# Supplementary material for: A tutorial review of linear rheology for polymer chemists: basics and best practices for covalent adaptable networks
Source: Royal Society of Chemistry journal article supplement (doi:10.1039/d3py01367g), 2024-01-01
Supplement: d3py01367g1.xlsx [file d3py01367g1.xlsx]

## Sheet: Shift Factors and Master Curves
Experimental Shift Factors
T [°C]	aT	bT
130	1	1.1
145	1	1
160	1	1
175	1	1
190	1	1
T [K]	Experimental log(aT)	WLF log(aT)	Residual Squared	WLF aT		WLF Parameters
403.15	0	2.04545	4.18388	111.034		C1	15
418.15	0	0.957447	0.916704	9.06665		C2 [K]	250
433.15	0	0	0	1		Tref [K]	433.15
448.15	0	-0.849057	0.720897	0.141561
463.15	0	-1.60714	2.58291	0.0247091
		Residual Squared Sum	8.40439
Instructions for using PS Rheology TTS.xlsx
1. Change the values of aT to shift the curves in the SAOS tan δ plot until the data collapse into a single continuous curve. 2. Use the Solver plug-in to fit the aT values to the WLF equation. In the Solver window, set cell D17 to be the objective cell to be minimized, and cells H11 and H12 as the cells that should be varied. 3. Change the values of bT to refine the superposition in the SAOS G' …

## Sheet: SAOS Data
130 °C								145 °C								160 °C								175 °C								190 °C
Angular Frequency	Storage Modulus	Loss Modulus	Tan Delta	Shifted Frequency	Shifted Storage Modulus	Shifted Loss Modulus		Angular Frequency	Storage Modulus	Loss Modulus	Tan Delta	Shifted Frequency	Shifted Storage Modulus	Shifted Loss Modulus		Angular Frequency	Storage Modulus	Loss Modulus	Tan Delta	Shifted Frequency	Shifted Storage Modulus	Shifted Loss Modulus		Angular Frequency	Storage Modulus	Loss Modulus	Tan Delta	Shifted Frequency	Shifted Storage Modulus	Shifted Loss Modulus		Angular Frequency	Storage Modulus	Loss Modulus	Tan Delta	Shifted Frequency	Shifted Storage Modulus	Shifted Loss Modulus
[rad/s]	[Pa]	[Pa]		[rad/s]	[Pa]	[Pa]		[rad/s]	[Pa]	[Pa]		[rad/s]	[Pa]	[Pa]		[rad/s]	[Pa]	[Pa]		[rad/s]	[Pa]	[Pa]		[rad/s]	[Pa]	[Pa]		[rad/s]	[Pa]	[Pa]		[rad/s]	[Pa]	[Pa]		[rad/s]	[Pa]	[Pa]
300	3366000	6079700	1.806	300	3.7026e+06	6.68767e+06		300	596730	616870	1.034	300	596730	616870		300	292930	159900	0.546	300	292930	159900		300	210030	75546	0.36	300	210030	75546		300	153880	51895	0.337	300	153880	51895
215	2585300	4779400	1.849	215	2843830	5257340		215	525220	501540	0.955	215	525220	501540		215	270900	134750	0.497	215	270900	134750		215	198090	68353	0.345	215	198090	68353		215	144290	49697	0.344	215	144290	49697
154	2034300	3740000	1.838	154	2237730	4.114e+06		154	465790	409570	0.879	154	465790	409570		154	252210	114660	0.455	154	252210	114660		154	186750	62821	0.336	154	186750	62821		154	134810	47960	0.356	154	134810	47960
111	1638500	2931400	1.789	111	1.80235e+06	3.22454e+06		111	416000	335720	0.807	111	416000	335720		111	235710	98559	0.418	111	235710	98559		111	175900	58603	0.333	111	175900	58603		111	125300	46511	0.371	111	125300	46511
79.3	1344900	2296300	1.707	79.3	1.47939e+06	2525930		79.3	374200	276250	0.738	79.3	374200	276250		79.3	221290	85896	0.388	79.3	221290	85896		79.3	165400	55441	0.335	79.3	165400	55441		79.3	115890	45269	0.391	79.3	115890	45269
56.9	1122000	1803800	1.608	56.9	1234200	1.98418e+06		56.9	338990	228180	0.673	56.9	338990	228180		56.9	208340	76003	0.365	56.9	208340	76003		56.9	155040	53019	0.342	56.9	155040	53019		56.9	106590	44121	0.414	56.9	106590	44121
40.8	948680	1421800	1.499	40.8	1.04355e+06	1.56398e+06		40.8	309680	189580	0.612	40.8	309680	189580		40.8	196460	68353	0.348	40.8	196460	68353		40.8	144810	51139	0.353	40.8	144810	51139		40.8	97384	42971	0.441	40.8	97384	42971
29.3	812420	1129100	1.39	29.3	893662	1242010		29.3	284800	158400	0.556	29.3	284800	158400		29.3	185310	62496	0.337	29.3	185310	62496		29.3	134710	49646	0.369	29.3	134710	49646		29.3	88336	41752	0.473	29.3	88336	41752
21	700790	897900	1.281	21	770869	987690		21	263370	133150	0.506	21	263370	133150		21	174710	58069	0.332	21	174710	58069		21	124630	48344	0.388	21	124630	48344		21	79484	40410	0.508	21	79484	40410
15	609580	717220	1.177	15	670538	788942		15	245140	113010	0.461	15	245140	113010		15	164470	54740	0.333	15	164470	54740		15	114660	47146	0.411	15	114660	47146		15	70855	38881	0.549	15	70855	38881
10.8	534350	575490	1.077	10.8	587785	633039		10.8	229350	97002	0.423	10.8	229350	97002		10.8	154430	52214	0.338	10.8	154430	52214		10.8	104780	45931	0.438	10.8	104780	45931		10.8	62567	37174	0.594	10.8	62567	37174
7.74	472440	464300	0.983	7.74	519684	510730		7.74	215410	84361	0.392	7.74	215410	84361		7.74	144380	50222	0.348	7.74	144380	50222		7.74	95099	44660	0.47	7.74	95099	44660		7.74	54641	35249	0.645	7.74	54641	35249
5.55	420440	376070	0.894	5.55	462484	413677		5.55	203010	74583	0.367	5.55	203010	74583		5.55	134530	48697	0.362	5.55	134530	48697		5.55	85552	43221	0.505	5.55	85552	43221		5.55	47159	33129	0.702	5.55	47159	33129
3.98	377140	306190	0.812	3.98	414854	336809		3.98	191620	67019	0.35	3.98	191620	67019		3.98	124620	47344	0.38	3.98	124620	47344		3.98	76247	41573	0.545	3.98	76247	41573		3.98	40158	30797	0.767	3.98	40158	30797
2.85	340960	250510	0.735	2.85	375056	275561		2.85	180690	61186	0.339	2.85	180690	61186		2.85	114960	46179	0.402	2.85	114960	46179		2.85	67320	39723	0.59	2.85	67320	39723		2.85	33736	28326	0.84	2.85	33736	28326
2.05	310790	206130	0.663	2.05	341869	226743		2.05	170290	56677	0.333	2.05	170290	56677		2.05	105430	45141	0.428	2.05	105430	45141		2.05	58796	37685	0.641	2.05	58796	37685		2.05	27917	25756	0.923	2.05	27917	25756
1.47	284740	170100	0.597	1.47	313214	187110		1.47	160250	53413	0.333	1.47	160250	53413		1.47	95850	43865	0.458	1.47	95850	43865		1.47	50751	35416	0.698	1.47	50751	35416		1.47	22729	23108	1.017	1.47	22729	23108
1.05	263360	141500	0.537	1.05	289696	155650		1.05	150520	50870	0.338	1.05	150520	50870		1.05	86569	42566	0.492	1.05	86569	42566		1.05	43335	32943	0.76	1.05	43335	32943		1.05	18187	20439	1.124	1.05	18187	20439
0.754	244150	118750	0.486	0.754	268565	130625		0.754	140780	49003	0.348	0.754	140780	49003		0.754	77492	41148	0.531	0.754	77492	41148		0.754	36477	30319	0.831	0.754	36477	30319		0.754	14289	17829	1.248	0.754	14289	17829
0.541	227660	101140	0.444	0.541	250426	111254		0.541	131210	47473	0.362	0.541	131210	47473		0.541	68763	39400	0.573	0.541	68763	39400		0.541	30196	27596	0.914	0.541	30196	27596		0.541	11035	15336	1.39	0.541	11035	15336
0.388	213240	87316	0.409	0.388	234564	96047.6		0.388	121270	46412	0.383	0.388	121270	46412		0.388	60121	37746	0.628	0.388	60121	37746		0.388	24587	24760	1.007	0.388	24587	24760		0.388	8320.8	12959	1.557	0.388	8320.8	12959
0.278	200580	76928	0.384	0.278	220638	84620.8		0.278	112110	45000	0.401	0.278	112110	45000		0.278	52112	35382	0.679	0.278	52112	35382		0.278	19651	21835	1.111	0.278	19651	21835		0.278	6176.7	10800	1.749	0.278	6176.7	10800
0.199	190110	68096	0.358	0.199	209121	74905.6		0.199	102790	43990	0.428	0.199	102790	43990		0.199	44530	33081	0.743	0.199	44530	33081		0.199	15377	19021	1.237	0.199	15377	19021		0.199	4480.3	8857.7	1.977	0.199	4480.3	8857.7
0.143	178880	61253	0.342	0.143	196768	67378.3		0.143	93051	42739	0.459	0.143	93051	42739		0.143	37575	30353	0.808	0.143	37575	30353		0.143	11916	16328	1.37	0.143	11916	16328		0.143	3198.3	7170.5	2.242	0.143	3198.3	7170.5
0.103	168600	56788	0.337	0.103	185460	62466.8		0.103	83875	41445	0.494	0.103	83875	41445		0.103	31344	27788	0.887	0.103	31344	27788		0.103	8974.5	13787	1.536	0.103	8974.5	13787		0.103	2238.1	5734.6	2.562	0.103	2238.1	5734.6
0.0735	158650	53599	0.338	0.0735	174515	58958.9		0.0735	75520	40024	0.53	0.0735	75520	40024		0.0735	25703	25069	0.975	0.0735	25703	25069		0.0735	6647.5	11486	1.728	0.0735	6647.5	11486		0.0735	1532.6	4513.1	2.945	0.0735	1532.6	4513.1
0.0527	149260	50294	0.337	0.0527	164186	55323.4		0.0527	66782	38411	0.575	0.0527	66782	38411		0.0527	20659	22222	1.076	0.0527	20659	22222		0.0527	4807.3	9382.1	1.952	0.0527	4807.3	9382.1		0.0527	1015.1	3475.2	3.423	0.0527	1015.1	3475.2
0.0378	139280	47966	0.344	0.0378	153208	52762.6		0.0378	58554	36415	0.622	0.0378	58554	36415		0.0378	16408	19456	1.186	0.0378	16408	19456		0.0378	3422.8	7574.8	2.213	0.0378	3422.8	7574.8		0.0378	665.74	2661.1	3.997	0.0378	665.74	2661.1
0.0271	130020	47075	0.362	0.0271	143022	51782.5		0.0271	50931	34416	0.676	0.0271	50931	34416		0.0271	12746	16811	1.319	0.0271	12746	16811		0.0271	2386.3	6011.4	2.519	0.0271	2386.3	6011.4		0.0271	428.89	2015.9	4.7	0.0271	428.89	2015.9
0.0194	120970	45962	0.38	0.0194	133067	50558.2		0.0194	43325	32221	0.744	0.0194	43325	32221		0.0194	9670.3	14283	1.477	0.0194	9670.3	14283		0.0194	1614.7	4694.3	2.907	0.0194	1614.7	4694.3		0.0194	275.1	1519.3	5.523	0.0194	275.1	1519.3
0.0139	111550	44047	0.395	0.0139	122705	48451.7		0.0139	36607	29590	0.808	0.0139	36607	29590		0.0139	7227.8	11940	1.652	0.0139	7227.8	11940		0.0139	1077.4	3635.5	3.374	0.0139	1077.4	3635.5		0.0139	169.66	1122.5	6.617	0.0139	169.66	1122.5
0.01	101900	42940	0.421	0.01	112090	47234		0.01	30467	26961	0.885	0.01	30467	26961		0.01	5293.2	9828.9	1.857	0.01	5293.2	9828.9		0.01	707.65	2783.3	3.933	0.01	707.65	2783.3		0.01	104.82	825.8	7.878	0.01	104.82	825.8

## Sheet: Stress Relaxation Data
130 °C					145 °C					160 °C					175 °C					190 °C
Interval Time	Relaxation Modulus	Shifted Interval Time	Shifted Relaxation Modulus		Interval Time	Relaxation Modulus	Shifted Interval Time	Shifted Relaxation Modulus		Interval Time	Relaxation Modulus	Shifted Interval Time	Shifted Relaxation Modulus		Interval Time	Relaxation Modulus	Shifted Interval Time	Shifted Relaxation Modulus		Interval Time	Relaxation Modulus	Shifted Interval Time	Shifted Relaxation Modulus
[s]	[Pa]	[s]	[Pa]		[s]	[Pa]	[s]	[Pa]		[s]	[Pa]	[s]	[Pa]		[s]	[Pa]	[s]	[Pa]		[s]	[Pa]	[s]	[Pa]
0.2011	292350	0.2011	321585		0.2009	143340	0.2009	143340		0.2009	92657	0.2009	92657		0.2009	57334	0.2009	57334		0.201	29941	0.201	29941
0.3012	249030	0.3012	273933		0.3008	130680	0.3008	130680		0.3008	81822	0.3008	81822		0.302	47469	0.302	47469		0.302	23032	0.302	23032
0.4013	226460	0.4013	249106		0.4018	122890	0.4018	122890		0.4018	74767	0.4018	74767		0.4029	41392	0.4029	41392		0.403	19029	0.403	19029
0.5009	212110	0.5009	233321		0.5029	117270	0.5029	117270		0.5029	69591	0.5029	69591		0.505	37077	0.505	37077		0.505	16309	0.505	16309
0.601	201640	0.601	221804		0.604	112850	0.604	112850		0.604	65506	0.604	65506		0.6069	33793	0.6069	33793		0.607	14327	0.607	14327
0.7021	193690	0.7021	213059		0.7048	109230	0.7048	109230		0.7048	62169	0.7048	62169		0.709	31171	0.709	31171		0.7091	12796	0.7091	12796
0.8022	187590	0.8022	206349		0.8059	106140	0.8059	106140		0.8059	59349	0.8059	59349		0.812	29000	0.812	29000		0.812	11555	0.812	11555
0.9023	182300	0.9023	200530		0.908	103420	0.908	103420		0.908	56884	0.908	56884		0.9149	27148	0.9149	27148		0.915	10543	0.915	10543
1.003	178020	1.003	195822		1.01	101070	1.01	101070		1.01	54727	1.01	54727		1.019	25561	1.019	25561		1.019	9709.4	1.019	9709.4
1.103	174370	1.103	191807		1.112	98929	1.112	98929		1.112	52820	1.112	52820		1.123	24186	1.123	24186		1.123	8969.2	1.123	8969.2
1.204	170980	1.204	188078		1.214	96999	1.214	96999		1.214	51087	1.214	51087		1.227	22983	1.227	22983		1.227	8349.1	1.227	8349.1
1.304	168130	1.304	184943		1.316	95230	1.316	95230		1.316	49533	1.316	49533		1.332	21869	1.332	21869		1.332	7805.7	1.332	7805.7
1.405	165500	1.405	182050		1.419	93581	1.419	93581		1.419	48097	1.419	48097		1.438	20854	1.438	20854		1.438	7327	1.438	7327
1.506	163080	1.506	179388		1.522	92088	1.522	92088		1.522	46790	1.522	46790		1.544	19977	1.544	19977		1.544	6876	1.544	6876
1.607	161060	1.607	177166		1.625	90648	1.625	90648		1.625	45575	1.625	45575		1.65	19169	1.65	19169		1.65	6493.3	1.65	6493.3
1.707	158970	1.707	174867		1.728	89355	1.728	89355		1.728	44428	1.728	44428		1.756	18414	1.756	18414		1.756	6150.3	1.756	6150.3
1.808	157220	1.808	172942		1.832	88108	1.832	88108		1.832	43381	1.832	43381		1.864	17719	1.864	17719		1.864	5841.9	1.864	5841.9
1.909	155660	1.909	171226		1.935	86975	1.935	86975		1.935	42379	1.935	42379		1.971	17089	1.971	17089		1.971	5552.7	1.971	5552.7
2.01	153970	2.01	169367		2.039	85847	2.039	85847		2.039	41460	2.039	41460		2.079	16521	2.079	16521		2.079	5298.8	2.079	5298.8
2.111	152600	2.111	167860		2.143	84794	2.143	84794		2.143	40580	2.143	40580		2.187	15963	2.187	15963		2.187	5039.5	2.187	5039.5
2.212	151180	2.212	166298		2.248	83781	2.248	83781		2.248	39762	2.248	39762		2.296	15474	2.296	15474		2.296	4817	2.296	4817
2.313	149870	2.313	164857		2.352	82819	2.352	82819		2.352	38973	2.352	38973		2.405	14985	2.405	14985		2.405	4630.1	2.405	4630.1
2.414	148740	2.414	163614		2.457	81917	2.457	81917		2.457	38208	2.457	38208		2.515	14557	2.515	14557		2.515	4416.1	2.515	4416.1
2.516	147550	2.516	162305		2.562	81011	2.562	81011		2.562	37508	2.562	37508		2.625	14108	2.625	14108		2.625	4256.2	2.625	4256.2
2.617	146400	2.617	161040		2.667	80171	2.667	80171		2.667	36828	2.667	36828		2.736	13693	2.736	13693		2.736	4077.3	2.736	4077.3
2.718	145500	2.718	160050		2.772	79331	2.772	79331		2.772	36201	2.772	36201		2.847	13312	2.847	13312		2.847	3929.2	2.847	3929.2
2.82	144370	2.82	158807		2.878	78560	2.878	78560		2.878	35554	2.878	35554		2.958	12964	2.958	12964		2.958	3772.8	2.958	3772.8
2.921	143520	2.921	157872		2.984	77796	2.984	77796		2.984	34994	2.984	34994		3.07	12617	3.07	12617		3.07	3646.1	3.07	3646.1
3.022	142520	3.022	156772		3.09	77094	3.09	77094		3.09	34430	3.09	34430		3.183	12288	3.183	12288		3.183	3521.8	3.183	3521.8
3.124	141650	3.124	155815		3.196	76369	3.196	76369		3.196	33909	3.196	33909		3.295	11978	3.295	11978		3.295	3406.3	3.295	3406.3
3.226	140900	3.226	154990		3.302	75704	3.302	75704		3.302	33387	3.302	33387		3.409	11687	3.409	11687		3.409	3282.9	3.409	3282.9
3.327	140010	3.327	154011		3.409	75039	3.409	75039		3.409	32878	3.409	32878		3.522	11407	3.522	11407		3.522	3196.8	3.522	3196.8
3.429	139270	3.429	153197		3.516	74415	3.516	74415		3.516	32384	3.516	32384		3.637	11147	3.637	11147		3.637	3087	3.637	3087
3.531	138610	3.531	152471		3.623	73780	3.623	73780		3.623	31936	3.623	31936		3.751	10884	3.751	10884		3.751	2967.8	3.751	2967.8
3.632	137750	3.632	151525		3.73	73208	3.73	73208		3.73	31475	3.73	31475		3.866	10622	3.866	10622		3.866	2888.5	3.866	2888.5
3.734	137250	3.734	150975		3.838	72599	3.838	72599		3.838	31036	3.838	31036		3.982	10368	3.982	10368		3.982	2787.4	3.982	2787.4
3.836	136550	3.836	150205		3.945	72066	3.945	72066		3.945	30613	3.945	30613		4.098	10162	4.098	10162		4.098	2714	4.098	2714
3.938	135950	3.938	149545		4.053	71494	4.053	71494		4.053	30206	4.053	30206		4.215	9952.6	4.215	9952.6		4.215	2638.3	4.215	2638.3
4.04	135310	4.04	148841		4.162	70963	4.162	70963		4.162	29825	4.162	29825		4.332	9735.4	4.332	9735.4		4.332	2569.7	4.332	2569.7
4.142	134670	4.142	148137		4.27	70449	4.27	70449		4.27	29448	4.27	29448		4.449	9530.2	4.449	9530.2		4.449	2493.7	4.449	2493.7
4.244	134230	4.244	147653		4.378	69945	4.378	69945		4.378	29071	4.378	29071		4.567	9352.9	4.567	9352.9		4.567	2428.6	4.567	2428.6
4.346	133580	4.346	146938		4.487	69420	4.487	69420		4.487	28713	4.487	28713		4.685	9159.7	4.685	9159.7		4.685	2341.2	4.685	2341.2
4.448	133040	4.448	146344		4.596	68951	4.596	68951		4.596	28383	4.596	28383		4.804	8961.3	4.804	8961.3		4.804	2298.2	4.804	2298.2
4.551	132550	4.551	145805		4.706	68474	4.706	68474		4.706	28007	4.706	28007		4.924	8785.3	4.924	8785.3		4.924	2252.6	4.924	2252.6
4.653	131970	4.653	145167		4.815	68012	4.815	68012		4.815	27710	4.815	27710		5.043	8600.8	5.043	8600.8		5.043	2180.1	5.043	2180.1
4.755	131570	4.755	144727		4.925	67567	4.925	67567		4.925	27385	4.925	27385		5.164	8454.5	5.164	8454.5		5.164	2134.2	5.164	2134.2
4.858	130860	4.858	143946		5.035	67119	5.035	67119		5.035	27075	5.035	27075		5.285	8284.9	5.285	8284.9		5.285	2069.8	5.285	2069.8
4.96	130540	4.96	143594		5.145	66656	5.145	66656		5.145	26766	5.145	26766		5.406	8137.6	5.406	8137.6		5.406	2028.1	5.406	2028.1
5.063	130070	5.063	143077		5.255	66280	5.255	66280		5.255	26474	5.255	26474		5.528	7977.2	5.528	7977.2		5.528	1959.8	5.528	1959.8
5.165	129520	5.165	142472		5.366	65807	5.366	65807		5.366	26189	5.366	26189		5.65	7851.7	5.65	7851.7		5.65	1926.4	5.65	1926.4
5.268	129180	5.268	142098		5.476	65476	5.476	65476		5.476	25901	5.476	25901		5.773	7711	5.773	7711		5.773	1869.2	5.773	1869.2
5.37	128600	5.37	141460		5.588	65024	5.588	65024		5.588	25625	5.588	25625		5.896	7566	5.896	7566		5.896	1819.6	5.896	1819.6
5.473	128300	5.473	141130		5.699	64624	5.699	64624		5.699	25353	5.699	25353		6.02	7426	6.02	7426		6.02	1776.1	6.02	1776.1
5.576	127780	5.576	140558		5.81	64252	5.81	64252		5.81	25091	5.81	25091		6.144	7317.4	6.144	7317.4		6.144	1749.4	6.144	1749.4
5.679	127420	5.679	140162		5.922	63821	5.922	63821		5.922	24836	5.922	24836		6.269	7191	6.269	7191		6.269	1694.6	6.269	1694.6
5.781	127020	5.781	139722		6.034	63488	6.034	63488		6.034	24574	6.034	24574		6.394	7055.1	6.394	7055.1		6.394	1660.9	6.394	1660.9
5.884	126520	5.884	139172		6.146	63116	6.146	63116		6.146	24334	6.146	24334		6.52	6954.8	6.52	6954.8		6.52	1626.2	6.52	1626.2
5.987	126240	5.987	138864		6.258	62733	6.258	62733		6.258	24088	6.258	24088		6.646	6825.5	6.646	6825.5		6.646	1588.2	6.646	1588.2
6.09	125730	6.09	138303		6.371	62406	6.371	62406		6.371	23843	6.371	23843		6.773	6712	6.773	6712		6.773	1566.4	6.773	1566.4
6.193	125470	6.193	138017		6.484	62056	6.484	62056		6.484	23613	6.484	23613		6.9	6609.7	6.9	6609.7		6.9	1531.9	6.9	1531.9
6.296	125010	6.296	137511		6.597	61719	6.597	61719		6.597	23381	6.597	23381		7.028	6501.2	7.028	6501.2		7.028	1495.2	7.028	1495.2
6.4	124760	6.4	137236		6.71	61389	6.71	61389		6.71	23155	6.71	23155		7.156	6399.6	7.156	6399.6		7.156	1485.7	7.156	1485.7
6.503	124360	6.503	136796		6.824	61046	6.824	61046		6.824	22944	6.824	22944		7.285	6310.4	7.285	6310.4		7.285	1436.4	7.285	1436.4
6.606	123940	6.606	136334		6.937	60716	6.937	60716		6.937	22734	6.937	22734		7.415	6208.8	7.415	6208.8		7.415	1407.3	7.415	1407.3
6.709	123650	6.709	136015		7.051	60429	7.051	60429		7.051	22503	7.051	22503		7.544	6112.7	7.544	6112.7		7.544	1370.8	7.544	1370.8
6.813	123220	6.813	135542		7.165	60105	7.165	60105		7.165	22313	7.165	22313		7.675	6009.2	7.675	6009.2		7.675	1335.4	7.675	1335.4
6.916	123040	6.916	135344		7.28	59766	7.28	59766		7.28	22101	7.28	22101		7.806	5919.9	7.806	5919.9		7.806	1321.8	7.806	1321.8
7.02	122570	7.02	134827		7.394	59486	7.394	59486		7.394	21908	7.394	21908		7.937	5845.5	7.937	5845.5		7.937	1297.9	7.937	1297.9
7.123	122240	7.123	134464		7.509	59199	7.509	59199		7.509	21688	7.509	21688		8.069	5749.3	8.069	5749.3		8.069	1275.2	8.069	1275.2
7.227	122000	7.227	134200		7.624	58891	7.624	58891		7.624	21525	7.624	21525		8.202	5678.5	8.202	5678.5		8.202	1249.7	8.202	1249.7
7.33	121600	7.33	133760		7.74	58591	7.74	58591		7.74	21335	7.74	21335		8.335	5586.6	8.335	5586.6		8.335	1225.6	8.335	1225.6
7.434	121340	7.434	133474		7.855	58308	7.855	58308		7.855	21136	7.855	21136		8.468	5525.4	8.468	5525.4		8.468	1217.3	8.468	1217.3
7.538	120980	7.538	133078		7.971	58005	7.971	58005		7.971	20961	7.971	20961		8.602	5456.5	8.602	5456.5		8.602	1177.7	8.602	1177.7
7.642	120750	7.642	132825		8.087	57714	8.087	57714		8.087	20783	8.087	20783		8.737	5370.5	8.737	5370.5		8.737	1151.6	8.737	1151.6
7.745	120420	7.745	132462		8.204	57463	8.204	57463		8.204	20604	8.204	20604		8.872	5293	8.872	5293		8.872	1139.3	8.872	1139.3
7.849	120190	7.849	132209		8.32	57215	8.32	57215		8.32	20435	8.32	20435		9.008	5227.3	9.008	5227.3		9.008	1108.6	9.008	1108.6
7.953	119860	7.953	131846		8.437	56907	8.437	56907		8.437	20286	8.437	20286		9.144	5162.2	9.144	5162.2		9.144	1085.1	9.144	1085.1
8.057	119530	8.057	131483		8.554	56643	8.554	56643		8.554	20105	8.554	20105		9.281	5086.8	9.281	5086.8		9.281	1079.1	9.281	1079.1
8.161	119290	8.161	131219		8.671	56385	8.671	56385		8.671	19944	8.671	19944		9.419	5032.6	9.419	5032.6		9.419	1060.2	9.419	1060.2
8.265	118940	8.265	130834		8.788	56140	8.788	56140		8.788	19790	8.788	19790		9.557	4945.4	9.557	4945.4		9.557	1039.4	9.557	1039.4
8.37	118810	8.37	130691		8.906	55872	8.906	55872		8.906	19634	8.906	19634		9.695	4890.4	9.695	4890.4		9.695	1012.7	9.695	1012.7
8.474	118380	8.474	130218		9.024	55618	9.024	55618		9.024	19483	9.024	19483		9.834	4826.6	9.834	4826.6		9.834	1007.5	9.834	1007.5
8.578	118200	8.578	130020		9.142	55367	9.142	55367		9.142	19329	9.142	19329		9.974	4774	9.974	4774		9.974	988.37	9.974	988.37
8.682	117700	8.682	129470		9.261	55131	9.261	55131		9.261	19167	9.261	19167		10.11	4708.3	10.11	4708.3		10.11	968.28	10.11	968.28
8.787	117640	8.787	129404		9.379	54869	9.379	54869		9.379	19022	9.379	19022		10.26	4645.9	10.26	4645.9		10.26	957.22	10.26	957.22
8.891	117300	8.891	129030		9.498	54633	9.498	54633		9.498	18887	9.498	18887		10.4	4568.7	10.4	4568.7		10.4	942.59	10.4	942.59
8.996	117150	8.996	128865		9.617	54386	9.617	54386		9.617	18741	9.617	18741		10.54	4515	10.54	4515		10.54	934.94	10.54	934.94
9.1	116860	9.1	128546		9.737	54163	9.737	54163		9.737	18605	9.737	18605		10.68	4470.8	10.68	4470.8		10.68	917.61	10.68	917.61
9.205	116590	9.205	128249		9.856	53958	9.856	53958		9.856	18444	9.856	18444		10.82	4398.9	10.82	4398.9		10.82	900.05	10.82	900.05
9.309	116270	9.309	127897		9.976	53752	9.976	53752		9.976	18322	9.976	18322		10.97	4333.5	10.97	4333.5		10.97	883.21	10.97	883.21
9.414	115970	9.414	127567		10.1	53532	10.1	53532		10.1	18179	10.1	18179		11.11	4298.3	11.11	4298.3		11.11	879.54	11.11	879.54
9.519	115880	9.519	127468		10.22	53282	10.22	53282		10.22	18040	10.22	18040		11.26	4237.5	11.26	4237.5		11.26	853.83	11.26	853.83
9.624	115550	9.624	127105		10.34	53060	10.34	53060		10.34	17910	10.34	17910		11.4	4196.9	11.4	4196.9		11.4	852.74	11.4	852.74
9.728	115410	9.728	126951		10.46	52831	10.46	52831		10.46	17779	10.46	17779		11.55	4131.4	11.55	4131.4		11.55	829.85	11.55	829.85
9.833	114970	9.833	126467		10.58	52606	10.58	52606		10.58	17652	10.58	17652		11.69	4085.5	11.69	4085.5		11.69	831.23	11.69	831.23
9.938	114850	9.938	126335		10.7	52410	10.7	52410		10.7	17517	10.7	17517		11.84	4030.9	11.84	4030.9		11.84	834.47	11.84	834.47
10.04	114570	10.04	126027		10.82	52207	10.82	52207		10.82	17392	10.82	17392		11.99	3980.5	11.99	3980.5		11.99	809.85	11.99	809.85
10.15	114450	10.15	125895		10.94	51992	10.94	51992		10.94	17279	10.94	17279		12.14	3934.6	12.14	3934.6		12.14	804.72	12.14	804.72
10.25	114120	10.25	125532		11.06	51784	11.06	51784		11.06	17158	11.06	17158		12.29	3886.3	12.29	3886.3		12.29	792.56	12.29	792.56
10.36	113970	10.36	125367		11.19	51551	11.19	51551		11.19	17049	11.19	17049		12.44	3841.2	12.44	3841.2		12.44	784.4	12.44	784.4
10.46	113690	10.46	125059		11.31	51380	11.31	51380		11.31	16922	11.31	16922		12.59	3794	12.59	3794		12.59	764.9	12.59	764.9
10.57	113550	10.57	124905		11.43	51192	11.43	51192		11.43	16796	11.43	16796		12.74	3752.3	12.74	3752.3		12.74	760.4	12.74	760.4
10.67	113230	10.67	124553		11.56	50990	11.56	50990		11.56	16678	11.56	16678		12.89	3696.3	12.89	3696.3		12.89	746.22	12.89	746.22
10.78	113070	10.78	124377		11.68	50793	11.68	50793		11.68	16564	11.68	16564		13.04	3650.4	13.04	3650.4		13.04	731.74	13.04	731.74
10.89	112890	10.89	124179		11.8	50614	11.8	50614		11.8	16462	11.8	16462		13.19	3610.1	13.19	3610.1		13.19	716.87	13.19	716.87
10.99	112680	10.99	123948		11.93	50407	11.93	50407		11.93	16359	11.93	16359		13.35	3565.9	13.35	3565.9		13.35	715.22	13.35	715.22
11.1	112510	11.1	123761		12.05	50198	12.05	50198		12.05	16238	12.05	16238		13.5	3522.9	13.5	3522.9		13.5	712.74	13.5	712.74
11.2	112220	11.2	123442		12.17	50034	12.17	50034		12.17	16148	12.17	16148		13.65	3484.2	13.65	3484.2		13.65	692.17	13.65	692.17
11.31	112090	11.31	123299		12.3	49847	12.3	49847		12.3	16023	12.3	16023		13.81	3447.4	13.81	3447.4		13.81	696.27	13.81	696.27
11.41	111860	11.41	123046		12.42	49619	12.42	49619		12.42	15917	12.42	15917		13.96	3418.2	13.96	3418.2		13.96	658.29	13.96	658.29
11.52	111770	11.52	122947		12.55	49460	12.55	49460		12.55	15825	12.55	15825		14.12	3379.2	14.12	3379.2		14.12	671.9	14.12	671.9
11.62	111500	11.62	122650		12.67	49235	12.67	49235		12.67	15700	12.67	15700		14.28	3315.2	14.28	3315.2		14.28	636.02	14.28	636.02
11.73	111390	11.73	122529		12.8	49057	12.8	49057		12.8	15614	12.8	15614		14.43	3301.7	14.43	3301.7		14.43	638.7	14.43	638.7
11.84	111140	11.84	122254		12.92	48908	12.92	48908		12.92	15513	12.92	15513		14.59	3261.1	14.59	3261.1		14.59	613.42	14.59	613.42
11.94	111040	11.94	122144		13.05	48735	13.05	48735		13.05	15414	13.05	15414		14.75	3210.9	14.75	3210.9		14.75	615.54	14.75	615.54
12.05	110690	12.05	121759		13.18	48571	13.18	48571		13.18	15310	13.18	15310		14.91	3188.9	14.91	3188.9		14.91	580.87	14.91	580.87
12.15	110670	12.15	121737		13.3	48397	13.3	48397		13.3	15215	13.3	15215		15.07	3149.3	15.07	3149.3		15.07	588.88	15.07	588.88
12.26	110370	12.26	121407		13.43	48261	13.43	48261		13.43	15138	13.43	15138		15.23	3126.1	15.23	3126.1		15.23	568.51	15.23	568.51
12.37	110360	12.37	121396		13.56	48054	13.56	48054		13.56	15029	13.56	15029		15.39	3063.3	15.39	3063.3		15.39	563.59	15.39	563.59
12.47	109970	12.47	120967		13.68	47931	13.68	47931		13.68	14943	13.68	14943		15.56	3041.7	15.56	3041.7		15.56	545.93	15.56	545.93
12.58	110030	12.58	121033		13.81	47738	13.81	47738		13.81	14849	13.81	14849		15.72	3005	15.72	3005		15.72	555.07	15.72	555.07
12.69	109720	12.69	120692		13.94	47590	13.94	47590		13.94	14733	13.94	14733		15.88	2974.4	15.88	2974.4		15.88	541.36	15.88	541.36
12.79	109610	12.79	120571		14.07	47431	14.07	47431		14.07	14666	14.07	14666		16.05	2961.2	16.05	2961.2		16.05	535.27	16.05	535.27
12.9	109330	12.9	120263		14.2	47267	14.2	47267		14.2	14565	14.2	14565		16.21	2918.5	16.21	2918.5		16.21	531.35	16.21	531.35
13.01	109280	13.01	120208		14.32	47112	14.32	47112		14.32	14476	14.32	14476		16.38	2884.7	16.38	2884.7		16.38	533.36	16.38	533.36
13.11	109040	13.11	119944		14.45	46949	14.45	46949		14.45	14387	14.45	14387		16.54	2847.9	16.54	2847.9		16.54	525.51	16.54	525.51
13.22	108930	13.22	119823		14.58	46819	14.58	46819		14.58	14301	14.58	14301		16.71	2820.8	16.71	2820.8		16.71	522.07	16.71	522.07
13.32	108710	13.32	119581		14.71	46644	14.71	46644		14.71	14221	14.71	14221		16.88	2795.1	16.88	2795.1		16.88	523.01	16.88	523.01
13.43	108650	13.43	119515		14.84	46472	14.84	46472		14.84	14126	14.84	14126		17.04	2763.8	17.04	2763.8		17.04	512.55	17.04	512.55
13.54	108390	13.54	119229		14.97	46320	14.97	46320		14.97	14040	14.97	14040		17.21	2745.6	17.21	2745.6		17.21	508.93	17.21	508.93
13.65	108290	13.65	119119		15.1	46162	15.1	46162		15.1	13968	15.1	13968		17.38	2698.4	17.38	2698.4		17.38	485.34	17.38	485.34
13.75	108100	13.75	118910		15.23	45994	15.23	45994		15.23	13890	15.23	13890		17.55	2682	17.55	2682		17.55	492.17	17.55	492.17
13.86	107910	13.86	118701		15.36	45836	15.36	45836		15.36	13801	15.36	13801		17.72	2654.4	17.72	2654.4		17.72	485.97	17.72	485.97
13.97	107760	13.97	118536		15.49	45692	15.49	45692		15.49	13719	15.49	13719		17.89	2631.4	17.89	2631.4		17.89	475.72	17.89	475.72
14.07	107570	14.07	118327		15.63	45548	15.63	45548		15.63	13656	15.63	13656		18.07	2599.8	18.07	2599.8		18.07	460.24	18.07	460.24
14.18	107440	14.18	118184		15.76	45400	15.76	45400		15.76	13581	15.76	13581		18.24	2577.9	18.24	2577.9		18.24	457.96	18.24	457.96
14.29	107280	14.29	118008		15.89	45257	15.89	45257		15.89	13506	15.89	13506		18.41	2544.9	18.41	2544.9		18.41	443.81	18.41	443.81
14.39	107190	14.39	117909		16.02	45111	16.02	45111		16.02	13417	16.02	13417		18.59	2521.6	18.59	2521.6		18.59	431.78	18.59	431.78
14.5	106930	14.5	117623		16.15	44970	16.15	44970		16.15	13338	16.15	13338		18.76	2495.7	18.76	2495.7		18.76	415.84	18.76	415.84
14.61	106850	14.61	117535		16.28	44789	16.28	44789		16.28	13268	16.28	13268		18.94	2467.1	18.94	2467.1		18.94	411.8	18.94	411.8
14.72	106600	14.72	117260		16.42	44677	16.42	44677		16.42	13190	16.42	13190		19.11	2446.1	19.11	2446.1		19.11	408.25	19.11	408.25
14.82	106520	14.82	117172		16.55	44509	16.55	44509		16.55	13116	16.55	13116		19.29	2429.8	19.29	2429.8		19.29	410.62	19.29	410.62
14.93	106280	14.93	116908		16.68	44362	16.68	44362		16.68	13026	16.68	13026		19.47	2412.2	19.47	2412.2		19.47	405.15	19.47	405.15
15.04	106250	15.04	116875		16.82	44236	16.82	44236		16.82	12966	16.82	12966		19.65	2383.3	19.65	2383.3		19.65	403.21	19.65	403.21
15.15	105950	15.15	116545		16.95	44107	16.95	44107		16.95	12897	16.95	12897		19.83	2346.9	19.83	2346.9		19.83	397.43	19.83	397.43
15.25	105900	15.25	116490		17.09	43953	17.09	43953		17.09	12825	17.09	12825		20.01	2338.8	20.01	2338.8		20.01	385.11	20.01	385.11
15.36	105670	15.36	116237		17.22	43800	17.22	43800		17.22	12753	17.22	12753		20.19	2307.9	20.19	2307.9		20.19	372.8	20.19	372.8
15.47	105560	15.47	116116		17.36	43655	17.36	43655		17.36	12683	17.36	12683		20.37	2290	20.37	2290		20.37	371.76	20.37	371.76
15.58	105380	15.58	115918		17.49	43519	17.49	43519		17.49	12619	17.49	12619		20.55	2260.2	20.55	2260.2		20.55	364.14	20.55	364.14
15.68	105280	15.68	115808		17.63	43394	17.63	43394		17.63	12550	17.63	12550		20.73	2255	20.73	2255		20.73	340.02	20.73	340.02
15.79	105080	15.79	115588		17.76	43287	17.76	43287		17.76	12469	17.76	12469		20.92	2241.4	20.92	2241.4		20.92	338.81	20.92	338.81
15.9	104970	15.9	115467		17.9	43149	17.9	43149		17.9	12386	17.9	12386		21.1	2211	21.1	2211		21.1	325.2	21.1	325.2
16.01	104790	16.01	115269		18.03	42975	18.03	42975		18.03	12337	18.03	12337		21.29	2188.7	21.29	2188.7		21.29	336.67	21.29	336.67
16.12	104640	16.12	115104		18.17	42834	18.17	42834		18.17	12280	18.17	12280		21.47	2170.3	21.47	2170.3		21.47	329.66	21.47	329.66
16.22	104550	16.22	115005		18.3	42720	18.3	42720		18.3	12201	18.3	12201		21.66	2150.1	21.66	2150.1		21.66	334.23	21.66	334.23
16.33	104300	16.33	114730		18.44	42596	18.44	42596		18.44	12146	18.44	12146		21.85	2129.8	21.85	2129.8		21.85	327.59	21.85	327.59
16.44	104370	16.44	114807		18.58	42418	18.58	42418		18.58	12087	18.58	12087		22.03	2125.2	22.03	2125.2		22.03	312.54	22.03	312.54
16.55	103970	16.55	114367		18.72	42256	18.72	42256		18.72	12033	18.72	12033		22.22	2097.6	22.22	2097.6		22.22	320.26	22.22	320.26
16.66	104090	16.66	114499		18.85	42130	18.85	42130		18.85	11973	18.85	11973		22.41	2080.5	22.41	2080.5		22.41	315.33	22.41	315.33
16.77	103670	16.77	114037		18.99	42014	18.99	42014		18.99	11907	18.99	11907		22.6	2065.9	22.6	2065.9		22.6	320.99	22.6	320.99
16.87	103610	16.87	113971		19.13	41897	19.13	41897		19.13	11831	19.13	11831		22.79	2051.9	22.79	2051.9		22.79	304.82	22.79	304.82
16.98	103490	16.98	113839		19.27	41746	19.27	41746		19.27	11789	19.27	11789		22.99	2036.9	22.99	2036.9		22.99	308.72	22.99	308.72
17.09	103340	17.09	113674		19.41	41621	19.41	41621		19.41	11726	19.41	11726		23.18	2008.2	23.18	2008.2		23.18	301.3	23.18	301.3
17.2	103360	17.2	113696		19.55	41523	19.55	41523		19.55	11681	19.55	11681		23.37	1997.7	23.37	1997.7		23.37	290.16	23.37	290.16
17.31	103040	17.31	113344		19.69	41383	19.69	41383		19.69	11609	19.69	11609		23.57	1983.8	23.57	1983.8		23.57	281.45	23.57	281.45
17.42	103070	17.42	113377		19.83	41215	19.83	41215		19.83	11564	19.83	11564		23.76	1959.2	23.76	1959.2		23.76	280.61	23.76	280.61
17.53	102750	17.53	113025		19.96	41109	19.96	41109		19.96	11500	19.96	11500		23.96	1936.5	23.96	1936.5		23.96	273.31	23.96	273.31
17.63	102820	17.63	113102		20.11	41002	20.11	41002		20.11	11444	20.11	11444		24.15	1917.2	24.15	1917.2		24.15	275.55	24.15	275.55
17.74	102560	17.74	112816		20.25	40859	20.25	40859		20.25	11374	20.25	11374		24.35	1889.1	24.35	1889.1		24.35	279.05	24.35	279.05
17.85	102480	17.85	112728		20.39	40746	20.39	40746		20.39	11317	20.39	11317		24.55	1876.8	24.55	1876.8		24.55	281.55	24.55	281.55
17.96	102390	17.96	112629		20.53	40642	20.53	40642		20.53	11255	20.53	11255		24.75	1858	24.75	1858		24.75	264.34	24.75	264.34
18.07	102130	18.07	112343		20.67	40515	20.67	40515		20.67	11194	20.67	11194		24.95	1840.8	24.95	1840.8		24.95	273.06	24.95	273.06
18.18	102140	18.18	112354		20.81	40395	20.81	40395		20.81	11142	20.81	11142		25.15	1811.8	25.15	1811.8		25.15	264.27	25.15	264.27
18.29	101880	18.29	112068		20.95	40292	20.95	40292		20.95	11079	20.95	11079		25.35	1800.7	25.35	1800.7		25.35	264.12	25.35	264.12
18.4	101850	18.4	112035		21.1	40143	21.1	40143		21.1	11027	21.1	11027		25.55	1794.2	25.55	1794.2		25.55	268.91	25.55	268.91
18.51	101640	18.51	111804		21.24	40032	21.24	40032		21.24	10975	21.24	10975		25.75	1777.3	25.75	1777.3		25.75	266.06	25.75	266.06
18.62	101500	18.62	111650		21.38	39938	21.38	39938		21.38	10894	21.38	10894		25.96	1758.6	25.96	1758.6		25.96	255.68	25.96	255.68
18.73	101390	18.73	111529		21.52	39807	21.52	39807		21.52	10859	21.52	10859		26.16	1741	26.16	1741		26.16	261.72	26.16	261.72
18.84	101190	18.84	111309		21.67	39715	21.67	39715		21.67	10795	21.67	10795		26.37	1732.2	26.37	1732.2		26.37	240.37	26.37	240.37
18.94	101300	18.94	111430		21.81	39589	21.81	39589		21.81	10714	21.81	10714		26.57	1703.1	26.57	1703.1		26.58	246.65	26.58	246.65
19.05	100950	19.05	111045		21.95	39483	21.95	39483		21.95	10666	21.95	10666		26.78	1701.1	26.78	1701.1		26.78	254.91	26.78	254.91
19.16	101080	19.16	111188		22.1	39410	22.1	39410		22.1	10626	22.1	10626		26.99	1676.7	26.99	1676.7		26.99	243.22	26.99	243.22
19.27	100750	19.27	110825		22.24	39317	22.24	39317		22.24	10559	22.24	10559		27.2	1654.4	27.2	1654.4		27.2	255.15	27.2	255.15
19.38	100780	19.38	110858		22.39	39207	22.39	39207		22.39	10527	22.39	10527		27.41	1644.2	27.41	1644.2		27.41	237.14	27.41	237.14
19.49	100580	19.49	110638		22.53	39134	22.53	39134		22.53	10455	22.53	10455		27.62	1631.8	27.62	1631.8		27.62	240.22	27.62	240.22
19.6	100500	19.6	110550		22.68	39020	22.68	39020		22.68	10402	22.68	10402		27.83	1606.1	27.83	1606.1		27.83	237.76	27.83	237.76
19.71	100440	19.71	110484		22.82	38946	22.82	38946		22.82	10329	22.82	10329		28.04	1603.6	28.04	1603.6		28.04	258.43	28.04	258.43
19.82	100250	19.82	110275		22.97	38867	22.97	38867		22.97	10283	22.97	10283		28.26	1592.6	28.26	1592.6		28.26	245.89	28.26	245.89
19.93	100230	19.93	110253		23.12	38785	23.12	38785		23.12	10247	23.12	10247		28.47	1583.9	28.47	1583.9		28.47	244.69	28.47	244.69
20.04	100160	20.04	110176		23.26	38696	23.26	38696		23.26	10184	23.26	10184		28.68	1554.8	28.68	1554.8		28.68	250.55	28.68	250.55
20.15	99988	20.15	109987		23.41	38603	23.41	38603		23.41	10157	23.41	10157		28.9	1540.8	28.9	1540.8		28.9	227.68	28.9	227.68
20.26	100070	20.26	110077		23.56	38491	23.56	38491		23.56	10112	23.56	10112		29.12	1531.8	29.12	1531.8		29.12	235.99	29.12	235.99
20.37	99818	20.37	109800		23.7	38399	23.7	38399		23.7	10068	23.7	10068		29.33	1519.9	29.33	1519.9		29.33	235.88	29.33	235.88
20.48	99864	20.48	109850		23.85	38323	23.85	38323		23.85	10009	23.85	10009		29.55	1524.7	29.55	1524.7		29.55	237.24	29.55	237.24
20.59	99595	20.59	109555		24	38202	24	38202		24	9974	24	9974		29.77	1504.4	29.77	1504.4		29.77	225.58	29.77	225.58
20.7	99635	20.7	109599		24.15	38105	24.15	38105		24.15	9922.1	24.15	9922.1		29.99	1493.5	29.99	1493.5		29.99	213.6	29.99	213.6
20.81	99434	20.81	109377		24.3	38007	24.3	38007		24.3	9892.1	24.3	9892.1		30.21	1483	30.21	1483		30.21	203.62	30.21	203.62
20.92	99322	20.92	109254		24.44	37943	24.44	37943		24.44	9828.3	24.44	9828.3		30.43	1469.1	30.43	1469.1		30.43	213.98	30.43	213.98
21.03	99283	21.03	109211		24.59	37843	24.59	37843		24.59	9793.9	24.59	9793.9		30.66	1456.7	30.66	1456.7		30.66	196.92	30.66	196.92
21.15	99121	21.15	109033		24.74	37773	24.74	37773		24.74	9749.2	24.74	9749.2		30.88	1422.1	30.88	1422.1		30.88	191.51	30.88	191.51
21.26	99017	21.26	108919		24.89	37626	24.89	37626		24.89	9701.5	24.89	9701.5		31.1	1414.1	31.1	1414.1		31.1	187.17	31.1	187.17
21.37	99068	21.37	108975		25.04	37541	25.04	37541		25.04	9649.2	25.04	9649.2		31.33	1407.2	31.33	1407.2		31.33	196.07	31.33	196.07
21.48	98740	21.48	108614		25.19	37423	25.19	37423		25.19	9610.1	25.19	9610.1		31.55	1404.9	31.55	1404.9		31.56	192.76	31.56	192.76
21.59	98825	21.59	108708		25.34	37364	25.34	37364		25.34	9546.7	25.34	9546.7		31.78	1386.6	31.78	1386.6		31.78	182.27	31.78	182.27
21.7	98660	21.7	108526		25.49	37258	25.49	37258		25.49	9509.7	25.49	9509.7		32.01	1368.2	32.01	1368.2		32.01	185.2	32.01	185.2
21.81	98496	21.81	108346		25.65	37187	25.65	37187		25.65	9459.1	25.65	9459.1		32.24	1359.9	32.24	1359.9		32.24	188.71	32.24	188.71
21.92	98550	21.92	108405		25.8	37085	25.8	37085		25.8	9405.7	25.8	9405.7		32.47	1344.5	32.47	1344.5		32.47	165.24	32.47	165.24
22.03	98201	22.03	108021		25.95	36985	25.95	36985		25.95	9368.9	25.95	9368.9		32.7	1330.7	32.7	1330.7		32.7	172.3	32.7	172.3
22.14	98391	22.14	108230		26.1	36925	26.1	36925		26.1	9325.6	26.1	9325.6		32.93	1312.4	32.93	1312.4		32.93	173.36	32.93	173.36
22.25	98184	22.25	108002		26.25	36821	26.25	36821		26.25	9278.7	26.25	9278.7		33.16	1313.4	33.16	1313.4		33.17	174.43	33.17	174.43
22.37	98049	22.37	107854		26.41	36714	26.41	36714		26.41	9242.8	26.41	9242.8		33.4	1311.5	33.4	1311.5		33.4	167.38	33.4	167.38
22.48	98118	22.48	107930		26.56	36627	26.56	36627		26.56	9203.8	26.56	9203.8		33.63	1290.2	33.63	1290.2		33.63	176.26	33.63	176.26
22.59	97883	22.59	107671		26.71	36543	26.71	36543		26.71	9156.6	26.71	9156.6		33.87	1291.6	33.87	1291.6		33.87	170.47	33.87	170.47
22.7	97838	22.7	107622		26.87	36443	26.87	36443		26.87	9122.5	26.87	9122.5		34.11	1280.9	34.11	1280.9		34.11	169.53	34.11	169.53
22.81	97732	22.81	107505		27.02	36351	27.02	36351		27.02	9089.7	27.02	9089.7		34.34	1259.2	34.34	1259.2		34.34	172.35	34.34	172.35
22.92	97641	22.92	107405		27.18	36252	27.18	36252		27.18	9050.4	27.18	9050.4		34.58	1248.3	34.58	1248.3		34.58	181.11	34.58	181.11
23.03	97555	23.03	107311		27.33	36160	27.33	36160		27.33	9010.1	27.33	9010.1		34.82	1236.7	34.82	1236.7		34.82	178.09	34.82	178.09
23.15	97416	23.15	107158		27.49	36041	27.49	36041		27.49	8993.5	27.49	8993.5		35.06	1217.8	35.06	1217.8		35.06	176.82	35.06	176.82
23.26	97428	23.26	107171		27.64	35968	27.64	35968		27.64	8934.5	27.64	8934.5		35.3	1221.7	35.3	1221.7		35.3	180.43	35.3	180.43
23.37	97308	23.37	107039		27.8	35889	27.8	35889		27.8	8905.5	27.8	8905.5		35.54	1210.9	35.54	1210.9		35.55	170.9	35.55	170.9
23.48	97180	23.48	106898		27.95	35757	27.95	35757		27.95	8871.2	27.95	8871.2		35.79	1201.1	35.79	1201.1		35.79	172.49	35.79	172.49
23.59	97018	23.59	106720		28.11	35679	28.11	35679		28.11	8839.3	28.11	8839.3		36.03	1196.5	36.03	1196.5		36.03	171.69	36.03	171.69
23.7	96963	23.7	106659		28.27	35601	28.27	35601		28.27	8789.3	28.27	8789.3		36.28	1184.2	36.28	1184.2		36.28	181.41	36.28	181.41
23.82	96826	23.82	106509		28.42	35495	28.42	35495		28.42	8762.9	28.42	8762.9		36.52	1190.6	36.52	1190.6		36.52	172.77	36.52	172.77
23.93	96760	23.93	106436		28.58	35382	28.58	35382		28.58	8734.6	28.58	8734.6		36.77	1171.3	36.77	1171.3		36.77	172.89	36.77	172.89
24.04	96598	24.04	106258		28.74	35306	28.74	35306		28.74	8711.1	28.74	8711.1		37.02	1171.6	37.02	1171.6		37.02	171.51	37.02	171.51
24.15	96451	24.15	106096		28.89	35214	28.89	35214		28.89	8668.7	28.89	8668.7		37.27	1165.7	37.27	1165.7		37.27	169.43	37.27	169.43
24.26	96343	24.26	105977		29.05	35102	29.05	35102		29.05	8628.5	29.05	8628.5		37.52	1166.8	37.52	1166.8		37.52	163.34	37.52	163.34
24.38	96234	24.38	105857		29.21	35032	29.21	35032		29.21	8592.2	29.21	8592.2		37.77	1149.7	37.77	1149.7		37.77	170.96	37.77	170.96
24.49	96053	24.49	105658		29.37	34977	29.37	34977		29.37	8539.9	29.37	8539.9		38.02	1137	38.02	1137		38.02	179.74	38.02	179.74
24.6	96102	24.6	105712		29.53	34871	29.53	34871		29.53	8520.8	29.53	8520.8		38.28	1124	38.28	1124		38.28	173.7	38.28	173.7
24.71	95881	24.71	105469		29.69	34815	29.69	34815		29.69	8468.9	29.69	8468.9		38.53	1111.9	38.53	1111.9		38.53	169.53	38.53	169.53
24.83	95866	24.83	105453		29.85	34717	29.85	34717		29.85	8436.3	29.85	8436.3		38.78	1098.8	38.78	1098.8		38.79	174.23	38.79	174.23
24.94	95827	24.94	105410		30.01	34645	30.01	34645		30.01	8390.4	30.01	8390.4		39.04	1079.6	39.04	1079.6		39.04	164.5	39.04	164.5
25.05	95690	25.05	105259		30.17	34553	30.17	34553		30.17	8354.6	30.17	8354.6		39.3	1076.1	39.3	1076.1		39.3	149.7	39.3	149.7
25.16	95659	25.16	105225		30.33	34454	30.33	34454		30.33	8314.5	30.33	8314.5		39.56	1059.5	39.56	1059.5		39.56	156.18	39.56	156.18
25.28	95588	25.28	105147		30.49	34340	30.49	34340		30.49	8290.8	30.49	8290.8		39.82	1038.9	39.82	1038.9		39.82	155.84	39.82	155.84
25.39	95330	25.39	104863		30.65	34276	30.65	34276		30.65	8251	30.65	8251		40.08	1035.7	40.08	1035.7		40.08	140.6	40.08	140.6
25.5	95327	25.5	104860		30.81	34185	30.81	34185		30.81	8211.8	30.81	8211.8		40.34	1026.4	40.34	1026.4		40.34	136.21	40.34	136.21
25.61	95260	25.61	104786		30.98	34113	30.98	34113		30.98	8183.5	30.98	8183.5		40.6	1010.5	40.6	1010.5		40.6	137.84	40.6	137.84
25.73	95143	25.73	104657		31.14	34008	31.14	34008		31.14	8140.5	31.14	8140.5		40.87	1004.7	40.87	1004.7		40.87	135.69	40.87	135.69
25.84	95033	25.84	104536		31.3	33934	31.3	33934		31.3	8096.5	31.3	8096.5		41.13	994.13	41.13	994.13		41.13	123.54	41.13	123.54
25.95	95022	25.95	104524		31.46	33849	31.46	33849		31.46	8060.4	31.46	8060.4		41.4	993.03	41.4	993.03		41.4	125.87	41.4	125.87
26.07	94847	26.07	104332		31.63	33771	31.63	33771		31.63	8032	31.63	8032		41.66	984.83	41.66	984.83		41.66	126.3	41.66	126.3
26.18	94877	26.18	104365		31.79	33697	31.79	33697		31.79	7996.3	31.79	7996.3		41.93	977.19	41.93	977.19		41.93	125.1	41.93	125.1
26.29	94676	26.29	104144		31.95	33624	31.95	33624		31.95	7962	31.95	7962		42.2	952.32	42.2	952.32		42.2	126.72	42.2	126.72
26.41	94571	26.41	104028		32.12	33531	32.12	33531		32.12	7927.7	32.12	7927.7		42.47	954.36	42.47	954.36		42.47	121.84	42.47	121.84
26.52	94543	26.52	103997		32.28	33442	32.28	33442		32.28	7889	32.28	7889		42.74	939.74	42.74	939.74		42.74	121.1	42.74	121.1
26.63	94465	26.63	103912		32.45	33374	32.45	33374		32.45	7846.7	32.45	7846.7		43.01	933.43	43.01	933.43		43.01	114.93	43.01	114.93
26.75	94381	26.75	103819		32.61	33274	32.61	33274		32.61	7813.7	32.61	7813.7		43.29	923.92	43.29	923.92		43.29	116.33	43.29	116.33
26.86	94332	26.86	103765		32.78	33198	32.78	33198		32.78	7778.7	32.78	7778.7		43.56	916.98	43.56	916.98		43.56	114.28	43.56	114.28
26.97	94052	26.97	103457		32.95	33118	32.95	33118		32.95	7750.5	32.95	7750.5		43.84	926.03	43.84	926.03		43.84	111.2	43.84	111.2
27.09	94081	27.09	103489		33.11	33037	33.11	33037		33.11	7703.6	33.11	7703.6		44.11	912.14	44.11	912.14		44.11	113.16	44.11	113.16
27.2	94071	27.2	103478		33.28	32935	33.28	32935		33.28	7685.5	33.28	7685.5		44.39	908.36	44.39	908.36		44.39	117.55	44.39	117.55
27.31	93779	27.31	103157		33.44	32861	33.44	32861		33.44	7640	33.44	7640		44.67	897.2	44.67	897.2		44.67	121.5	44.67	121.5
27.43	93674	27.43	103041		33.61	32780	33.61	32780		33.61	7603.2	33.61	7603.2		44.95	906.09	44.95	906.09		44.95	118.42	44.95	118.42
27.54	93801	27.54	103181		33.78	32711	33.78	32711		33.78	7571.5	33.78	7571.5		45.23	897.91	45.23	897.91		45.23	117.09	45.23	117.09
27.65	93638	27.65	103002		33.95	32639	33.95	32639		33.95	7540.7	33.95	7540.7		45.51	885.31	45.51	885.31		45.51	119.71	45.51	119.71
27.77	93381	27.77	102719		34.12	32560	34.12	32560		34.12	7502.1	34.12	7502.1		45.8	884.87	45.8	884.87		45.8	109.02	45.8	109.02
27.88	93414	27.88	102755		34.28	32482	34.28	32482		34.28	7486.4	34.28	7486.4		46.08	866.59	46.08	866.59		46.08	103.11	46.08	103.11
28	93404	28	102744		34.45	32410	34.45	32410		34.45	7463.3	34.45	7463.3		46.37	867.57	46.37	867.57		46.37	99.955	46.37	99.955
28.11	93201	28.11	102521		34.62	32325	34.62	32325		34.62	7426.6	34.62	7426.6		46.65	853.87	46.65	853.87		46.65	92.829	46.65	92.829
28.22	93141	28.22	102455		34.79	32260	34.79	32260		34.79	7402.2	34.79	7402.2		46.94	846.27	46.94	846.27		46.94	96.75	46.94	96.75
28.34	93113	28.34	102424		34.96	32166	34.96	32166		34.96	7390.5	34.96	7390.5		47.23	837.59	47.23	837.59		47.23	89.077	47.23	89.077
28.45	92926	28.45	102219		35.13	32105	35.13	32105		35.13	7352.4	35.13	7352.4		47.52	826.83	47.52	826.83		47.52	96.003	47.52	96.003
28.57	92976	28.57	102274		35.3	32019	35.3	32019		35.3	7326.5	35.3	7326.5		47.81	824.88	47.81	824.88		47.81	103.88	47.81	103.88
28.68	92892	28.68	102181		35.47	31940	35.47	31940		35.47	7310.8	35.47	7310.8		48.11	823.17	48.11	823.17		48.11	108.28	48.11	108.28
28.8	92710	28.8	101981		35.65	31872	35.65	31872		35.65	7279.6	35.65	7279.6		48.4	808.47	48.4	808.47		48.4	103.26	48.4	103.26
28.91	92735	28.91	102009		35.82	31789	35.82	31789		35.82	7245.6	35.82	7245.6		48.69	813.21	48.69	813.21		48.69	113.46	48.69	113.46
29.02	92676	29.02	101944		35.99	31723	35.99	31723		35.99	7215.5	35.99	7215.5		48.99	812.49	48.99	812.49		48.99	101.14	48.99	101.14
29.14	92433	29.14	101676		36.16	31657	36.16	31657		36.16	7187.8	36.16	7187.8		49.29	806.14	49.29	806.14		49.29	100.97	49.29	100.97
29.25	92307	29.25	101538		36.34	31569	36.34	31569		36.34	7175	36.34	7175		49.59	799.74	49.59	799.74		49.59	95.247	49.59	95.247
29.37	92489	29.37	101738		36.51	31478	36.51	31478		36.51	7138.2	36.51	7138.2		49.89	786.62	49.89	786.62		49.89	98.369	49.89	98.369
29.48	92311	29.48	101542		36.68	31415	36.68	31415		36.68	7108.7	36.68	7108.7		50.19	781.86	50.19	781.86		50.19	94.258	50.19	94.258
29.6	92107	29.6	101318		36.86	31343	36.86	31343		36.86	7072	36.86	7072		50.49	773.65	50.49	773.65		50.49	98.064	50.49	98.064
29.71	92066	29.71	101273		37.03	31281	37.03	31281		37.03	7056.8	37.03	7056.8		50.79	773.53	50.79	773.53		50.79	90.396	50.79	90.396
29.83	92096	29.83	101306		37.2	31210	37.2	31210		37.2	7018.3	37.2	7018.3		51.1	773.85	51.1	773.85		51.1	101.45	51.1	101.45
29.94	91910	29.94	101101		37.38	31160	37.38	31160		37.38	7001.3	37.38	7001.3		51.4	767.58	51.4	767.58		51.4	90.454	51.4	90.454
30.06	91802	30.06	100982		37.55	31074	37.55	31074		37.55	6958.8	37.55	6958.8		51.71	758.26	51.71	758.26		51.71	99.883	51.71	99.883
30.17	91793	30.17	100972		37.73	31009	37.73	31009		37.73	6942.6	37.73	6942.6		52.02	745.2	52.02	745.2		52.02	97.913	52.02	97.913
30.29	91659	30.29	100825		37.91	30943	37.91	30943		37.91	6899.4	37.91	6899.4		52.33	733.22	52.33	733.22		52.33	97.444	52.33	97.444
30.4	91633	30.4	100796		38.08	30878	38.08	30878		38.08	6875	38.08	6875		52.64	736.55	52.64	736.55		52.64	98.448	52.64	98.448
30.52	91653	30.52	100818		38.26	30808	38.26	30808		38.26	6859.3	38.26	6859.3		52.95	714.8	52.95	714.8		52.95	93.715	52.95	93.715
30.63	91685	30.63	100854		38.44	30747	38.44	30747		38.44	6831	38.44	6831		53.27	706.28	53.27	706.28		53.27	96.484	53.27	96.484
30.75	91395	30.75	100535		38.61	30679	38.61	30679		38.61	6813.8	38.61	6813.8		53.58	713.32	53.58	713.32		53.58	92.916	53.58	92.916
30.87	91232	30.87	100355		38.79	30628	38.79	30628		38.79	6791.7	38.79	6791.7		53.9	698.55	53.9	698.55		53.9	95.527	53.9	95.527
30.98	91267	30.98	100394		38.97	30553	38.97	30553		38.97	6768.4	38.97	6768.4		54.21	697.75	54.21	697.75		54.21	100.28	54.21	100.28
31.1	91211	31.1	100332		39.15	30521	39.15	30521		39.15	6736	39.15	6736		54.53	698.72	54.53	698.72		54.53	105.38	54.53	105.38
31.21	91170	31.21	100287		39.33	30474	39.33	30474		39.33	6712.1	39.33	6712.1		54.85	711.72	54.85	711.72		54.85	104.85	54.85	104.85
31.33	91087	31.33	100196		39.51	30405	39.51	30405		39.51	6680.9	39.51	6680.9		55.17	709.6	55.17	709.6		55.17	102.98	55.17	102.98
31.44	91008	31.44	100109		39.68	30363	39.68	30363		39.68	6640.1	39.68	6640.1		55.5	717.99	55.5	717.99		55.5	102.65	55.5	102.65
31.56	90771	31.56	99848.1		39.87	30271	39.87	30271		39.87	6641.9	39.87	6641.9		55.82	716.2	55.82	716.2		55.82	101.59	55.82	101.59
31.67	90616	31.67	99677.6		40.04	30212	40.04	30212		40.04	6613.1	40.04	6613.1		56.14	702.64	56.14	702.64		56.14	98.367	56.14	98.367
31.79	90694	31.79	99763.4		40.23	30145	40.23	30145		40.23	6590.2	40.23	6590.2		56.47	694.14	56.47	694.14		56.47	106.21	56.47	106.21
31.91	90651	31.91	99716.1		40.41	30060	40.41	30060		40.41	6585.9	40.41	6585.9		56.8	681.8	56.8	681.8		56.8	104.81	56.8	104.81
32.02	90534	32.02	99587.4		40.59	29983	40.59	29983		40.59	6540.2	40.59	6540.2		57.13	672.34	57.13	672.34		57.13	97.445	57.13	97.445
32.14	90368	32.14	99404.8		40.77	29916	40.77	29916		40.77	6512.2	40.77	6512.2		57.46	673.37	57.46	673.37		57.46	100.71	57.46	100.71
32.26	90338	32.26	99371.8		40.95	29858	40.95	29858		40.95	6491	40.95	6491		57.79	654.8	57.79	654.8		57.79	87.489	57.79	87.489
32.37	90132	32.37	99145.2		41.13	29786	41.13	29786		41.13	6474.5	41.13	6474.5		58.12	644.45	58.12	644.45		58.12	85.155	58.12	85.155
32.49	89985	32.49	98983.5		41.32	29722	41.32	29722		41.32	6440.3	41.32	6440.3		58.46	636.08	58.46	636.08		58.46	84.068	58.46	84.068
32.6	90059	32.6	99064.9		41.5	29658	41.5	29658		41.5	6420.9	41.5	6420.9		58.79	634.88	58.79	634.88		58.79	78.869	58.79	78.869
32.72	89986	32.72	98984.6		41.68	29604	41.68	29604		41.68	6396.2	41.68	6396.2		59.13	634.84	59.13	634.84		59.13	79.151	59.13	79.151
32.84	89903	32.84	98893.3		41.87	29547	41.87	29547		41.87	6366.5	41.87	6366.5		59.47	622.97	59.47	622.97		59.47	77.429	59.47	77.429
32.95	89761	32.95	98737.1		42.05	29456	42.05	29456		42.05	6348.2	42.05	6348.2		59.81	625.47	59.81	625.47		59.81	75.877	59.81	75.877
33.07	89778	33.07	98755.8		42.24	29391	42.24	29391		42.24	6305.2	42.24	6305.2		60.15	636.88	60.15	636.88		60.15	75.627	60.15	75.627
33.19	89660	33.19	98626		42.42	29294	42.42	29294		42.42	6301.9	42.42	6301.9		60.49	634.98	60.49	634.98		60.49	72.485	60.49	72.485
33.3	89506	33.3	98456.6		42.61	29222	42.61	29222		42.61	6268.2	42.61	6268.2		60.83	624.02	60.83	624.02		60.83	78.409	60.83	78.409
33.42	89448	33.42	98392.8		42.79	29173	42.79	29173		42.79	6240.9	42.79	6240.9		61.18	620.76	61.18	620.76		61.18	87.423	61.18	87.423
33.54	89399	33.54	98338.9		42.98	29081	42.98	29081		42.98	6214.8	42.98	6214.8		61.53	612.28	61.53	612.28		61.53	86.702	61.53	86.702
33.65	89380	33.65	98318		43.16	29022	43.16	29022		43.16	6189.4	43.16	6189.4		61.87	613.05	61.87	613.05		61.87	90.579	61.87	90.579
33.77	89251	33.77	98176.1		43.35	28971	43.35	28971		43.35	6171.8	43.35	6171.8		62.22	607.03	62.22	607.03		62.22	90.807	62.22	90.807
33.89	89133	33.89	98046.3		43.54	28881	43.54	28881		43.54	6152	43.54	6152		62.57	597.23	62.57	597.23		62.57	87.623	62.57	87.623
34	89259	34	98184.9		43.73	28839	43.73	28839		43.73	6132.7	43.73	6132.7		62.93	597.68	62.93	597.68		62.93	89.936	62.93	89.936
34.12	89298	34.12	98227.8		43.91	28767	43.91	28767		43.91	6104.2	43.91	6104.2		63.28	578.11	63.28	578.11		63.28	84.888	63.28	84.888
34.24	89099	34.24	98008.9		44.1	28687	44.1	28687		44.1	6089	44.1	6089		63.64	571.76	63.64	571.76		63.64	85.794	63.64	85.794
34.35	89000	34.35	97900		44.29	28625	44.29	28625		44.29	6041.9	44.29	6041.9		63.99	572.09	63.99	572.09		63.99	92.97	63.99	92.97
34.47	89038	34.47	97941.8		44.48	28562	44.48	28562		44.48	6029.9	44.48	6029.9		64.35	573.35	64.35	573.35		64.35	93.04	64.35	93.04
34.59	89058	34.59	97963.8		44.67	28511	44.67	28511		44.67	6014.5	44.67	6014.5		64.71	573.36	64.71	573.36		64.71	88.833	64.71	88.833
34.71	88971	34.71	97868.1		44.86	28442	44.86	28442		44.86	5993.1	44.86	5993.1		65.07	566.28	65.07	566.28		65.07	86.816	65.07	86.816
34.83	88971	34.83	97868.1		45.05	28401	45.05	28401		45.05	5959.5	45.05	5959.5		65.43	574.6	65.43	574.6		65.43	86.148	65.43	86.148
34.94	88961	34.94	97857.1		45.24	28320	45.24	28320		45.24	5939.7	45.24	5939.7		65.8	564.73	65.8	564.73		65.8	77.418	65.8	77.418
35.06	88977	35.06	97874.7		45.43	28270	45.43	28270		45.43	5920.1	45.43	5920.1		66.16	577.55	66.16	577.55		66.16	78.16	66.16	78.16
35.18	88880	35.18	97768		45.62	28215	45.62	28215		45.62	5904.1	45.62	5904.1		66.53	565.61	66.53	565.61		66.53	76.695	66.53	76.695
35.3	88816	35.3	97697.6		45.81	28183	45.81	28183		45.81	5876	45.81	5876		66.9	569.35	66.9	569.35		66.9	72.629	66.9	72.629
35.41	88695	35.41	97564.5		46.01	28106	46.01	28106		46.01	5861.1	46.01	5861.1		67.27	565.72	67.27	565.72		67.27	65.891	67.27	65.891
35.53	88702	35.53	97572.2		46.2	28070	46.2	28070		46.2	5830.8	46.2	5830.8		67.64	560.04	67.64	560.04		67.64	63.892	67.64	63.892
35.65	88583	35.65	97441.3		46.39	28016	46.39	28016		46.39	5812.7	46.39	5812.7		68.01	555.82	68.01	555.82		68.01	58.574	68.01	58.574
35.77	88524	35.77	97376.4		46.59	27969	46.59	27969		46.59	5787.3	46.59	5787.3		68.38	553.04	68.38	553.04		68.38	61.832	68.38	61.832
35.88	88465	35.88	97311.5		46.78	27939	46.78	27939		46.78	5779.6	46.78	5779.6		68.76	549.58	68.76	549.58		68.76	54.03	68.76	54.03
36	88488	36	97336.8		46.97	27862	46.97	27862		46.97	5759.9	46.97	5759.9		69.14	548.98	69.14	548.98		69.14	45.981	69.14	45.981
36.12	88506	36.12	97356.6		47.17	27838	47.17	27838		47.17	5721.7	47.17	5721.7		69.52	557.91	69.52	557.91		69.52	46.086	69.52	46.086
36.24	88295	36.24	97124.5		47.36	27742	47.36	27742		47.36	5716.4	47.36	5716.4		69.9	550.51	69.9	550.51		69.9	39.312	69.9	39.312
36.36	88183	36.36	97001.3		47.56	27697	47.56	27697		47.56	5683.8	47.56	5683.8		70.28	545.96	70.28	545.96		70.28	36.367	70.28	36.367
36.48	88090	36.48	96899		47.75	27631	47.75	27631		47.75	5667.3	47.75	5667.3		70.66	541.7	70.66	541.7		70.66	32.9	70.66	32.9
36.59	88022	36.59	96824.2		47.95	27550	47.95	27550		47.95	5631	47.95	5631		71.04	529.62	71.04	529.62		71.05	38.157	71.05	38.157
36.71	87858	36.71	96643.8		48.15	27525	48.15	27525		48.15	5618.8	48.15	5618.8		71.43	517.19	71.43	517.19		71.43	39.534	71.43	39.534
36.83	87778	36.83	96555.8		48.34	27444	48.34	27444		48.34	5607	48.34	5607		71.82	512.52	71.82	512.52		71.82	36.691	71.82	36.691
36.95	87686	36.95	96454.6		48.54	27391	48.54	27391		48.54	5571.4	48.54	5571.4		72.21	510.97	72.21	510.97		72.21	40.947	72.21	40.947
37.07	87708	37.07	96478.8		48.74	27329	48.74	27329		48.74	5562.3	48.74	5562.3		72.6	495.36	72.6	495.36		72.6	42.419	72.6	42.419
37.19	87747	37.19	96521.7		48.94	27246	48.94	27246		48.94	5529.9	48.94	5529.9		72.99	484.99	72.99	484.99		72.99	45.484	72.99	45.484
37.31	87581	37.31	96339.1		49.14	27180	49.14	27180		49.14	5502.9	49.14	5502.9		73.39	471.69	73.39	471.69		73.39	47.314	73.39	47.314
37.42	87423	37.42	96165.3		49.34	27136	49.34	27136		49.34	5477.5	49.34	5477.5		73.78	461.39	73.78	461.39		73.78	47.024	73.78	47.024
37.54	87343	37.54	96077.3		49.53	27055	49.53	27055		49.53	5459.6	49.53	5459.6		74.18	455.84	74.18	455.84		74.18	47.759	74.18	47.759
37.66	87346	37.66	96080.6		49.73	27010	49.73	27010		49.73	5451.9	49.73	5451.9		74.58	464.14	74.58	464.14		74.58	42.148	74.58	42.148
37.78	87289	37.78	96017.9		49.93	26976	49.93	26976		49.93	5434.9	49.93	5434.9		74.98	459.05	74.98	459.05		74.98	33.943	74.98	33.943
37.9	87092	37.9	95801.2		50.13	26900	50.13	26900		50.13	5431.6	50.13	5431.6		75.38	457.11	75.38	457.11		75.38	36.053	75.38	36.053
38.02	86836	38.02	95519.6		50.34	26845	50.34	26845		50.34	5400.5	50.34	5400.5		75.78	446.98	75.78	446.98		75.79	38.035	75.79	38.035
38.14	86807	38.14	95487.7		50.54	26809	50.54	26809		50.54	5373.8	50.54	5373.8		76.19	436.18	76.19	436.18		76.19	48.706	76.19	48.706
38.26	86763	38.26	95439.3		50.74	26764	50.74	26764		50.74	5352.7	50.74	5352.7		76.6	428.47	76.6	428.47		76.6	47.078	76.6	47.078
38.38	86755	38.38	95430.5		50.94	26697	50.94	26697		50.94	5341	50.94	5341		77.01	433.35	77.01	433.35		77.01	49.106	77.01	49.106
38.5	86640	38.5	95304		51.14	26653	51.14	26653		51.14	5318.6	51.14	5318.6		77.42	435.55	77.42	435.55		77.42	43.36	77.42	43.36
38.61	86470	38.61	95117		51.35	26611	51.35	26611		51.35	5299.3	51.35	5299.3		77.83	427.16	77.83	427.16		77.83	40.719	77.83	40.719
38.73	86355	38.73	94990.5		51.55	26566	51.55	26566		51.55	5273.4	51.55	5273.4		78.24	444.26	78.24	444.26		78.24	31.104	78.24	31.104
38.85	86473	38.85	95120.3		51.75	26530	51.75	26530		51.75	5256.9	51.75	5256.9		78.66	439.68	78.66	439.68		78.66	35.909	78.66	35.909
38.97	86481	38.97	95129.1		51.96	26449	51.96	26449		51.96	5237.9	51.96	5237.9		79.07	447.69	79.07	447.69		79.08	34.927	79.08	34.927
39.09	86406	39.09	95046.6		52.16	26410	52.16	26410		52.16	5228.3	52.16	5228.3		79.49	450.65	79.49	450.65		79.49	35.482	79.49	35.482
39.21	86350	39.21	94985		52.37	26352	52.37	26352		52.37	5216.3	52.37	5216.3		79.91	441.05	79.91	441.05		79.91	35.938	79.91	35.938
39.33	86176	39.33	94793.6		52.57	26303	52.57	26303		52.57	5201.5	52.57	5201.5		80.34	431.38	80.34	431.38		80.34	37.258	80.34	37.258
39.45	86183	39.45	94801.3		52.78	26232	52.78	26232		52.78	5178.9	52.78	5178.9		80.76	432.78	80.76	432.78		80.76	37.906	80.76	37.906
39.57	86266	39.57	94892.6		52.98	26184	52.98	26184		52.98	5153.6	52.98	5153.6		81.18	436.81	81.18	436.81		81.18	33.914	81.18	33.914
39.69	86162	39.69	94778.2		53.19	26138	53.19	26138		53.19	5141.3	53.19	5141.3		81.61	419.23	81.61	419.23		81.61	41.321	81.61	41.321
39.81	86005	39.81	94605.5		53.4	26076	53.4	26076		53.4	5121.3	53.4	5121.3		82.04	423.95	82.04	423.95		82.04	56.255	82.04	56.255
39.93	85872	39.93	94459.2		53.61	26037	53.61	26037		53.61	5089.7	53.61	5089.7		82.47	416.72	82.47	416.72		82.47	63.154	82.47	63.154
40.05	85779	40.05	94356.9		53.81	25966	53.81	25966		53.81	5070.2	53.81	5070.2		82.9	421.6	82.9	421.6		82.91	72.034	82.91	72.034
40.17	85829	40.17	94411.9		54.02	25928	54.02	25928		54.02	5064.6	54.02	5064.6		83.34	412.15	83.34	412.15		83.34	77.254	83.34	77.254
40.29	85835	40.29	94418.5		54.23	25861	54.23	25861		54.23	5034.5	54.23	5034.5		83.78	409.05	83.78	409.05		83.78	79.403	83.78	79.403
40.41	85654	40.41	94219.4		54.44	25802	54.44	25802		54.44	5017.7	54.44	5017.7		84.21	398.75	84.21	398.75		84.21	80.661	84.21	80.661
40.53	85513	40.53	94064.3		54.65	25713	54.65	25713		54.65	5004.9	54.65	5004.9		84.65	400.85	84.65	400.85		84.65	72.001	84.65	72.001
40.65	85460	40.65	94006		54.86	25646	54.86	25646		54.86	4983.3	54.86	4983.3		85.09	390.87	85.09	390.87		85.09	63.878	85.09	63.878
40.77	85455	40.77	94000.5		55.07	25563	55.07	25563		55.07	4970.2	55.07	4970.2		85.54	375.5	85.54	375.5		85.54	55.127	85.54	55.127
40.89	85404	40.89	93944.4		55.28	25492	55.28	25492		55.28	4961.2	55.28	4961.2		85.98	372.4	85.98	372.4		85.98	49.729	85.98	49.729
41.01	85402	41.01	93942.2		55.49	25425	55.49	25425		55.49	4934.4	55.49	4934.4		86.43	373.59	86.43	373.59		86.43	44.714	86.43	44.714
41.13	85206	41.13	93726.6		55.7	25353	55.7	25353		55.7	4924.5	55.7	4924.5		86.88	361.55	86.88	361.55		86.88	43.482	86.88	43.482
41.26	85147	41.26	93661.7		55.91	25286	55.91	25286		55.91	4909.1	55.91	4909.1		87.33	369.45	87.33	369.45		87.33	41.791	87.33	41.791
41.38	85117	41.38	93628.7		56.13	25211	56.13	25211		56.13	4893.5	56.13	4893.5		87.78	362.68	87.78	362.68		87.78	31.471	87.78	31.471
41.5	85153	41.5	93668.3		56.34	25164	56.34	25164		56.34	4869.7	56.34	4869.7		88.23	354.83	88.23	354.83		88.23	22.908	88.23	22.908
41.62	85247	41.62	93771.7		56.55	25119	56.55	25119		56.55	4848.5	56.55	4848.5		88.69	352.49	88.69	352.49		88.69	24.484	88.69	24.484
41.74	85261	41.74	93787.1		56.77	25064	56.77	25064		56.77	4844.4	56.77	4844.4		89.15	354.08	89.15	354.08		89.15	25.7	89.15	25.7
41.86	85058	41.86	93563.8		56.98	25031	56.98	25031		56.98	4831.5	56.98	4831.5		89.6	347.1	89.6	347.1		89.6	25.747	89.6	25.747
41.98	84823	41.98	93305.3		57.2	24981	57.2	24981		57.2	4802.2	57.2	4802.2		90.06	337.74	90.06	337.74		90.07	27.749	90.07	27.749
42.1	84711	42.1	93182.1		57.41	24940	57.41	24940		57.41	4794.2	57.41	4794.2		90.53	336.97	90.53	336.97		90.53	27.192	90.53	27.192
42.22	84743	42.22	93217.3		57.63	24932	57.63	24932		57.63	4767.2	57.63	4767.2		90.99	339.48	90.99	339.48		90.99	35.234	90.99	35.234
42.34	84816	42.34	93297.6		57.84	24907	57.84	24907		57.84	4751.7	57.84	4751.7		91.46	336.38	91.46	336.38		91.46	34.192	91.46	34.192
42.47	84958	42.47	93453.8		58.06	24869	58.06	24869		58.06	4734	58.06	4734		91.93	327.64	91.93	327.64		91.93	37.694	91.93	37.694
42.59	84992	42.59	93491.2		58.27	24817	58.27	24817		58.27	4722.7	58.27	4722.7		92.4	316.64	92.4	316.64		92.4	37.698	92.4	37.698
42.71	84865	42.71	93351.5		58.49	24764	58.49	24764		58.49	4699.4	58.49	4699.4		92.87	310.33	92.87	310.33		92.87	37.219	92.87	37.219
42.83	84678	42.83	93145.8		58.71	24735	58.71	24735		58.71	4684.1	58.71	4684.1		93.35	300.96	93.35	300.96		93.35	37.193	93.35	37.193
42.95	84685	42.95	93153.5		58.93	24685	58.93	24685		58.93	4680.8	58.93	4680.8		93.82	297.11	93.82	297.11		93.82	33.832	93.82	33.832
43.07	84750	43.07	93225		59.15	24679	59.15	24679		59.15	4665.4	59.15	4665.4		94.3	293.91	94.3	293.91		94.3	36.907	94.3	36.907
43.19	84700	43.19	93170		59.37	24653	59.37	24653		59.37	4637.6	59.37	4637.6		94.78	293.27	94.78	293.27		94.78	34.239	94.78	34.239
43.32	84656	43.32	93121.6		59.59	24631	59.59	24631		59.59	4619.2	59.59	4619.2		95.26	295.99	95.26	295.99		95.26	29.202	95.26	29.202
43.44	84564	43.44	93020.4		59.8	24574	59.8	24574		59.8	4616.9	59.8	4616.9		95.75	291.7	95.75	291.7		95.75	30.851	95.75	30.851
43.56	84513	43.56	92964.3		60.03	24536	60.03	24536		60.03	4593.5	60.03	4593.5		96.23	283.63	96.23	283.63		96.23	26.088	96.23	26.088
43.68	84448	43.68	92892.8		60.25	24478	60.25	24478		60.25	4581	60.25	4581		96.72	286.1	96.72	286.1		96.72	23.665	96.72	23.665
43.8	84389	43.8	92827.9		60.47	24428	60.47	24428		60.47	4572.8	60.47	4572.8		97.21	282.89	97.21	282.89		97.21	21.877	97.21	21.877
43.93	84216	43.93	92637.6		60.69	24391	60.69	24391		60.69	4571.7	60.69	4571.7		97.7	285.72	97.7	285.72		97.7	22.191	97.7	22.191
44.05	84186	44.05	92604.6		60.91	24343	60.91	24343		60.91	4538.9	60.91	4538.9		98.2	276.98	98.2	276.98		98.2	22.593	98.2	22.593
44.17	84227	44.17	92649.7		61.13	24292	61.13	24292		61.13	4523.9	61.13	4523.9		98.69	276.84	98.69	276.84		98.69	23.796	98.69	23.796
44.29	84324	44.29	92756.4		61.36	24228	61.36	24228		61.36	4502	61.36	4502		99.19	281.18	99.19	281.18		99.19	23.256	99.19	23.256
44.41	84105	44.41	92515.5		61.58	24205	61.58	24205		61.58	4490.2	61.58	4490.2		99.69	284.22	99.69	284.22		99.69	26.206	99.69	26.206
44.54	83994	44.54	92393.4		61.8	24139	61.8	24139		61.8	4466.4	61.8	4466.4		100.2	286.76	100.2	286.76		100.2	27.549	100.2	27.549
44.66	83925	44.66	92317.5		62.03	24064	62.03	24064		62.03	4463.5	62.03	4463.5		100.7	287.73	100.7	287.73
44.78	83894	44.78	92283.4		62.25	24031	62.25	24031		62.25	4454.4	62.25	4454.4		101.2	297.24	101.2	297.24
44.9	83883	44.9	92271.3		62.48	24028	62.48	24028		62.48	4423	62.48	4423		101.7	291.72	101.7	291.72
45.03	83806	45.03	92186.6		62.7	23950	62.7	23950		62.7	4416	62.7	4416		102.2	288.77	102.2	288.77
45.15	83871	45.15	92258.1		62.93	23903	62.93	23903		62.93	4387.3	62.93	4387.3		102.7	294.29	102.7	294.29
45.27	83936	45.27	92329.6		63.16	23879	63.16	23879		63.16	4380.7	63.16	4380.7		103.2	292.7	103.2	292.7
45.39	83816	45.39	92197.6		63.38	23817	63.38	23817		63.38	4360.5	63.38	4360.5		103.8	292.71	103.8	292.71
45.52	83665	45.52	92031.5		63.61	23774	63.61	23774		63.61	4341.1	63.61	4341.1		104.3	290.24	104.3	290.24
45.64	83564	45.64	91920.4		63.84	23733	63.84	23733		63.84	4336.7	63.84	4336.7		104.8	291.84	104.8	291.84
45.76	83430	45.76	91773		64.07	23683	64.07	23683		64.07	4307.5	64.07	4307.5		105.3	299.19	105.3	299.19
45.89	83403	45.89	91743.3		64.3	23632	64.3	23632		64.3	4304.5	64.3	4304.5		105.8	296.58	105.8	296.58
46.01	83322	46.01	91654.2		64.53	23597	64.53	23597		64.53	4279.9	64.53	4279.9		106.4	292.85	106.4	292.85
46.13	83426	46.13	91768.6		64.76	23541	64.76	23541		64.76	4275.3	64.76	4275.3		106.9	294.83	106.9	294.83
46.26	83473	46.26	91820.3		64.99	23512	64.99	23512		64.99	4260.8	64.99	4260.8		107.4	291.01	107.4	291.01
46.38	83400	46.38	91740		65.22	23446	65.22	23446		65.22	4239.9	65.22	4239.9		108	292.45	108	292.45
46.5	83366	46.5	91702.6		65.45	23395	65.45	23395		65.45	4233.4	65.45	4233.4		108.5	293.16	108.5	293.16
46.63	83363	46.63	91699.3		65.68	23348	65.68	23348		65.68	4206.6	65.68	4206.6		109	295.54	109	295.54
46.75	83190	46.75	91509		65.91	23287	65.91	23287		65.91	4181.1	65.91	4181.1		109.6	294.01	109.6	294.01
46.87	82970	46.87	91267		66.15	23264	66.15	23264		66.15	4170	66.15	4170		110.1	291.57	110.1	291.57
47	82964	47	91260.4		66.38	23186	66.38	23186		66.38	4159.1	66.38	4159.1		110.7	290.21	110.7	290.21
47.12	82953	47.12	91248.3		66.61	23164	66.61	23164		66.61	4144.6	66.61	4144.6		111.2	286.38	111.2	286.38
47.24	82853	47.24	91138.3		66.85	23102	66.85	23102		66.85	4141.2	66.85	4141.2		111.8	281.63	111.8	281.63
47.37	82777	47.37	91054.7		67.08	23076	67.08	23076		67.08	4129	67.08	4129		112.3	271.86	112.3	271.86
47.49	82911	47.49	91202.1		67.32	23032	67.32	23032		67.32	4110.1	67.32	4110.1		112.9	259.17	112.9	259.17
47.61	82790	47.61	91069		67.55	22984	67.55	22984		67.55	4106.6	67.55	4106.6		113.4	250.31	113.4	250.31
47.74	82774	47.74	91051.4		67.79	22940	67.79	22940		67.79	4094.2	67.79	4094.2		114	247.28	114	247.28
47.86	82785	47.86	91063.5		68.02	22900	68.02	22900		68.02	4079.6	68.02	4079.6		114.5	249.14	114.5	249.14
47.99	82651	47.99	90916.1		68.26	22866	68.26	22866		68.26	4078.7	68.26	4078.7		115.1	251.02	115.1	251.02
48.11	82353	48.11	90588.3		68.5	22818	68.5	22818		68.5	4053.4	68.5	4053.4		115.7	250.8	115.7	250.8
48.23	82400	48.23	90640		68.74	22760	68.74	22760		68.74	4049.6	68.74	4049.6		116.2	254.5	116.2	254.5
48.36	82224	48.36	90446.4		68.97	22704	68.97	22704		68.97	4032.1	68.97	4032.1		116.8	249.5	116.8	249.5
48.48	82132	48.48	90345.2		69.21	22639	69.21	22639		69.21	4023	69.21	4023		117.4	239.28	117.4	239.28
48.61	82174	48.61	90391.4		69.45	22586	69.45	22586		69.45	4016.8	69.45	4016.8		117.9	235.69	117.9	235.69
48.73	81994	48.73	90193.4		69.69	22530	69.69	22530		69.69	4001.4	69.69	4001.4		118.5	222.09	118.5	222.09
48.86	81968	48.86	90164.8		69.93	22487	69.93	22487		69.93	3987.3	69.93	3987.3		119.1	214.61	119.1	214.61
48.98	82046	48.98	90250.6		70.17	22406	70.17	22406		70.17	3974.7	70.17	3974.7		119.7	216.58	119.7	216.58
49.1	81969	49.1	90165.9		70.41	22356	70.41	22356		70.41	3950.7	70.41	3950.7		120.3	216.17	120.3	216.17
49.23	81965	49.23	90161.5		70.66	22326	70.66	22326		70.66	3927.5	70.66	3927.5		120.8	216.33	120.8	216.33
49.35	81948	49.35	90142.8		70.9	22296	70.9	22296		70.9	3921.6	70.9	3921.6		121.4	216.8	121.4	216.8
49.48	81831	49.48	90014.1		71.14	22265	71.14	22265		71.14	3919.4	71.14	3919.4		122	216.66	122	216.66
49.6	81832	49.6	90015.2		71.38	22227	71.38	22227		71.38	3897.8	71.38	3897.8		122.6	221.15	122.6	221.15
49.73	81696	49.73	89865.6		71.63	22211	71.63	22211		71.63	3892	71.63	3892		123.2	229.57	123.2	229.57
49.85	81592	49.85	89751.2		71.87	22171	71.87	22171		71.87	3872.6	71.87	3872.6		123.8	231.25	123.8	231.25
49.98	81548	49.98	89702.8		72.12	22131	72.12	22131		72.12	3845.2	72.12	3845.2		124.4	239.16	124.4	239.16
50.1	81391	50.1	89530.1		72.36	22106	72.36	22106		72.36	3855	72.36	3855		125	239.2	125	239.2
50.23	81474	50.23	89621.4		72.61	22064	72.61	22064		72.61	3832	72.61	3832		125.6	237.45	125.6	237.45
50.35	81364	50.35	89500.4		72.85	22008	72.85	22008		72.85	3842.1	72.85	3842.1		126.2	237.21	126.2	237.21
50.48	81275	50.48	89402.5		73.1	21967	73.1	21967		73.1	3814.6	73.1	3814.6		126.8	228.3	126.8	228.3
50.6	81273	50.6	89400.3		73.35	21902	73.35	21902		73.35	3806.2	73.35	3806.2		127.4	217.1	127.4	217.1
50.73	81134	50.73	89247.4		73.59	21867	73.59	21867		73.59	3783.3	73.59	3783.3		128	218.62	128	218.62
50.86	81184	50.86	89302.4		73.84	21814	73.84	21814		73.84	3766.7	73.84	3766.7		128.7	209.76	128.7	209.76
50.98	81145	50.98	89259.5		74.09	21745	74.09	21745		74.09	3744.2	74.09	3744.2		129.3	212.13	129.3	212.13
51.11	81104	51.11	89214.4		74.34	21699	74.34	21699		74.34	3730.9	74.34	3730.9		129.9	213.25	129.9	213.25
51.23	81176	51.23	89293.6		74.59	21670	74.59	21670		74.59	3732.2	74.59	3732.2		130.5	212.98	130.5	212.98
51.36	81054	51.36	89159.4		74.84	21616	74.84	21616		74.84	3733.4	74.84	3733.4		131.1	214.77	131.1	214.77
51.49	81211	51.49	89332.1		75.09	21570	75.09	21570		75.09	3722.4	75.09	3722.4		131.8	211.83	131.8	211.83
51.61	81073	51.61	89180.3		75.34	21536	75.34	21536		75.34	3708.4	75.34	3708.4		132.4	213.18	132.4	213.18
51.74	81060	51.74	89166		75.59	21503	75.59	21503		75.59	3683	75.59	3683		133	201.68	133	201.68
51.86	81016	51.86	89117.6		75.85	21472	75.85	21472		75.85	3671.4	75.85	3671.4		133.7	193.8	133.7	193.8
51.99	80996	51.99	89095.6		76.1	21421	76.1	21421		76.1	3661.3	76.1	3661.3		134.3	192.12	134.3	192.12
52.12	80989	52.12	89087.9		76.35	21379	76.35	21379		76.35	3662.8	76.35	3662.8		135	207.64	135	207.64
52.24	80821	52.24	88903.1		76.6	21344	76.6	21344		76.6	3648.3	76.6	3648.3		135.6	197.25	135.6	197.25
52.37	80875	52.37	88962.5		76.86	21299	76.86	21299		76.86	3638.6	76.86	3638.6		136.2	197.44	136.2	197.44
52.49	80706	52.49	88776.6		77.11	21257	77.11	21257		77.11	3621.3	77.11	3621.3		136.9	207.04	136.9	207.04
52.62	80760	52.62	88836		77.37	21204	77.37	21204		77.37	3614.9	77.37	3614.9		137.5	198.5	137.5	198.5
52.75	80626	52.75	88688.6		77.62	21164	77.62	21164		77.62	3604.8	77.62	3604.8		138.2	199.9	138.2	199.9
52.87	80680	52.87	88748		77.88	21111	77.88	21111		77.88	3579.7	77.88	3579.7		138.9	187.23	138.9	187.23
53	80466	53	88512.6		78.14	21068	78.14	21068		78.14	3574.2	78.14	3574.2		139.5	186.05	139.5	186.05
53.13	80487	53.13	88535.7		78.39	21041	78.39	21041		78.39	3564.4	78.39	3564.4		140.2	184.76	140.2	184.76
53.25	80350	53.25	88385		78.65	21004	78.65	21004		78.65	3549.4	78.65	3549.4		140.8	190.8	140.8	190.8
53.38	80348	53.38	88382.8		78.91	20941	78.91	20941		78.91	3545.4	78.91	3545.4		141.5	184.87	141.5	184.87
53.51	80272	53.51	88299.2		79.17	20891	79.17	20891		79.17	3516.6	79.17	3516.6		142.2	191.91	142.2	191.91
53.63	80220	53.63	88242		79.43	20857	79.43	20857		79.43	3508.4	79.43	3508.4		142.9	186.2	142.9	186.2
53.76	80069	53.76	88075.9		79.69	20795	79.69	20795		79.69	3494.7	79.69	3494.7		143.5	188.53	143.5	188.53
53.89	80117	53.89	88128.7		79.95	20751	79.95	20751		79.95	3477.6	79.95	3477.6		144.2	180.07	144.2	180.07
54.01	80021	54.01	88023.1		80.21	20726	80.21	20726		80.21	3457.5	80.21	3457.5		144.9	180.88	144.9	180.88
54.14	80071	54.14	88078.1		80.47	20700	80.47	20700		80.47	3461.3	80.47	3461.3		145.6	173.34	145.6	173.34
54.27	79944	54.27	87938.4		80.73	20687	80.73	20687		80.73	3437	80.73	3437		146.3	177.6	146.3	177.6
54.4	79961	54.4	87957.1		80.99	20645	80.99	20645		80.99	3426.7	80.99	3426.7		147	176.02	147	176.02
54.52	79802	54.52	87782.2		81.26	20630	81.26	20630		81.26	3417.7	81.26	3417.7		147.6	190.41	147.6	190.41
54.65	79827	54.65	87809.7		81.52	20571	81.52	20571		81.52	3412.3	81.52	3412.3		148.3	193.5	148.3	193.5
54.78	79641	54.78	87605.1		81.78	20535	81.78	20535		81.78	3395.4	81.78	3395.4		149	192.48	149	192.48
54.91	79795	54.91	87774.5		82.05	20491	82.05	20491		82.05	3388.4	82.05	3388.4		149.7	185.87	149.7	185.87
55.03	79646	55.03	87610.6		82.31	20458	82.31	20458		82.31	3369.2	82.31	3369.2		150.4	181.03	150.4	181.03
55.16	79670	55.16	87637		82.58	20398	82.58	20398		82.58	3361.7	82.58	3361.7		151.1	171.56	151.1	171.56
55.29	79543	55.29	87497.3		82.85	20320	82.85	20320		82.85	3344.4	82.85	3344.4		151.9	165.42	151.9	165.42
55.42	79543	55.42	87497.3		83.11	20272	83.11	20272		83.11	3340	83.11	3340		152.6	165.04	152.6	165.04
55.54	79484	55.54	87432.4		83.38	20225	83.38	20225		83.38	3328.3	83.38	3328.3		153.3	175.02	153.3	175.02
55.67	79407	55.67	87347.7		83.65	20214	83.65	20214		83.65	3324.4	83.65	3324.4		154	181.72	154	181.72
55.8	79424	55.8	87366.4		83.92	20157	83.92	20157		83.92	3294.7	83.92	3294.7		154.7	180.03	154.7	180.03
55.93	79349	55.93	87283.9		84.19	20132	84.19	20132		84.19	3300.2	84.19	3300.2		155.4	176.61	155.4	176.61
56.06	79344	56.06	87278.4		84.45	20097	84.45	20097		84.45	3279.5	84.45	3279.5		156.2	178.16	156.2	178.16
56.18	79280	56.18	87208		84.72	20093	84.72	20093		84.72	3269.3	84.72	3269.3		156.9	184.41	156.9	184.41
56.31	79257	56.31	87182.7		85	20080	85	20080		85	3257.9	85	3257.9		157.6	181.69	157.6	181.69
56.44	79189	56.44	87107.9		85.27	20073	85.27	20073		85.27	3244.6	85.27	3244.6		158.4	166.13	158.4	166.13
56.57	79135	56.57	87048.5		85.54	20033	85.54	20033		85.54	3232.4	85.54	3232.4		159.1	156.72	159.1	156.72
56.7	79198	56.7	87117.8		85.81	20026	85.81	20026		85.81	3225.3	85.81	3225.3		159.8	160.29	159.8	160.29
56.83	79014	56.83	86915.4		86.08	20020	86.08	20020		86.08	3209.8	86.08	3209.8		160.6	151.43	160.6	151.43
56.95	79041	56.95	86945.1		86.36	19974	86.36	19974		86.36	3206.5	86.36	3206.5		161.3	150.06	161.3	150.06
57.08	78964	57.08	86860.4		86.63	19964	86.63	19964		86.63	3187.8	86.63	3187.8		162.1	150.74	162.1	150.74
57.21	78882	57.21	86770.2		86.9	19924	86.9	19924		86.9	3184.3	86.9	3184.3		162.8	151.77	162.8	151.77
57.34	78916	57.34	86807.6		87.18	19900	87.18	19900		87.18	3173.4	87.18	3173.4		163.6	145.49	163.6	145.49
57.47	78849	57.47	86733.9		87.45	19864	87.45	19864		87.45	3166.9	87.45	3166.9		164.4	143.26	164.4	143.26
57.6	78888	57.6	86776.8		87.73	19840	87.73	19840		87.73	3157.2	87.73	3157.2		165.1	150.12	165.1	150.12
57.73	78820	57.73	86702		88.01	19803	88.01	19803		88.01	3140.4	88.01	3140.4		165.9	157.67	165.9	157.67
57.86	78787	57.86	86665.7		88.28	19784	88.28	19784		88.28	3135.2	88.28	3135.2		166.7	145.49	166.7	145.49
57.99	78821	57.99	86703.1		88.56	19732	88.56	19732		88.56	3130.4	88.56	3130.4		167.4	143.51	167.4	143.51
58.11	78692	58.11	86561.2		88.84	19697	88.84	19697		88.84	3133.5	88.84	3133.5		168.2	138.57	168.2	138.57
58.24	78674	58.24	86541.4		89.12	19663	89.12	19663		89.12	3115.1	89.12	3115.1		169	144.76	169	144.76
58.37	78664	58.37	86530.4		89.4	19604	89.4	19604		89.4	3114	89.4	3114		169.8	151.24	169.8	151.24
58.5	78547	58.5	86401.7		89.68	19544	89.68	19544		89.68	3095.3	89.68	3095.3		170.5	153.8	170.5	153.8
58.63	78496	58.63	86345.6		89.96	19495	89.96	19495		89.96	3086.1	89.96	3086.1		171.3	155.02	171.3	155.02
58.76	78417	58.76	86258.7		90.24	19459	90.24	19459		90.24	3067.9	90.24	3067.9		172.1	152.32	172.1	152.32
58.89	78295	58.89	86124.5		90.52	19401	90.52	19401		90.52	3057.1	90.52	3057.1		172.9	144.33	172.9	144.33
59.02	78234	59.02	86057.4		90.8	19372	90.8	19372		90.8	3051.8	90.8	3051.8		173.7	136.03	173.7	136.03
59.15	78189	59.15	86007.9		91.09	19336	91.09	19336		91.09	3034.5	91.09	3034.5		174.5	124.1	174.5	124.1
59.28	78141	59.28	85955.1		91.37	19288	91.37	19288		91.37	3012	91.37	3012		175.3	143.75	175.3	143.75
59.41	78166	59.41	85982.6		91.65	19276	91.65	19276		91.65	2992.4	91.65	2992.4		176.1	132.43	176.1	132.43
59.54	78157	59.54	85972.7		91.94	19259	91.94	19259		91.94	2982.6	91.94	2982.6		176.9	142.24	176.9	142.24
59.67	78062	59.67	85868.2		92.22	19202	92.22	19202		92.22	2954.6	92.22	2954.6		177.7	134.2	177.7	134.2
59.8	78153	59.8	85968.3		92.51	19167	92.51	19167		92.51	2949.7	92.51	2949.7		178.6	132.58	178.6	132.58
59.93	78111	59.93	85922.1		92.79	19113	92.79	19113		92.79	2944.8	92.79	2944.8		179.4	129.78	179.4	129.78
60.06	78054	60.06	85859.4		93.08	19063	93.08	19063		93.08	2934.1	93.08	2934.1		180.2	129.96	180.2	129.96
60.19	78015	60.19	85816.5		93.37	19031	93.37	19031		93.37	2930.6	93.37	2930.6		181	122.92	181	122.92
60.32	78015	60.32	85816.5		93.66	19012	93.66	19012		93.66	2916.7	93.66	2916.7		181.9	128.62	181.9	128.62
60.45	77912	60.45	85703.2		93.94	18967	93.94	18967		93.94	2913.3	93.94	2913.3		182.7	125.06	182.7	125.06
60.58	77874	60.58	85661.4		94.23	18912	94.23	18912		94.23	2898.5	94.23	2898.5		183.5	125.6	183.5	125.6
60.71	77908	60.71	85698.8		94.52	18873	94.52	18873		94.52	2908.6	94.52	2908.6		184.4	128.65	184.4	128.65
60.84	77879	60.84	85666.9		94.81	18814	94.81	18814		94.81	2892	94.81	2892		185.2	135.95	185.2	135.95
60.97	77810	60.97	85591		95.1	18781	95.1	18781		95.1	2885.3	95.1	2885.3		186.1	139.21	186.1	139.21
61.1	77740	61.1	85514		95.39	18747	95.39	18747		95.39	2890.8	95.39	2890.8		186.9	157.19	186.9	157.19
61.23	77636	61.23	85399.6		95.69	18701	95.69	18701		95.69	2873.5	95.69	2873.5		187.8	141.81	187.8	141.81
61.36	77461	61.36	85207.1		95.98	18669	95.98	18669		95.98	2864.5	95.98	2864.5		188.6	136.47	188.6	136.47
61.5	77470	61.5	85217		96.27	18649	96.27	18649		96.27	2844.8	96.27	2844.8		189.5	123.48	189.5	123.48
61.63	77475	61.63	85222.5		96.57	18607	96.57	18607		96.57	2824.8	96.57	2824.8		190.3	120.88	190.3	120.88
61.76	77515	61.76	85266.5		96.86	18560	96.86	18560		96.86	2813.9	96.86	2813.9		191.2	119.13	191.2	119.13
61.89	77474	61.89	85221.4		97.16	18553	97.16	18553		97.16	2817	97.16	2817		192.1	129.9	192.1	129.9
62.02	77509	62.02	85259.9		97.45	18526	97.45	18526		97.45	2796.4	97.45	2796.4		193	133.95	193	133.95
62.15	77534	62.15	85287.4		97.75	18536	97.75	18536		97.75	2799.6	97.75	2799.6		193.8	131.47	193.8	131.47
62.28	77574	62.28	85331.4		98.04	18506	98.04	18506		98.04	2799.4	98.04	2799.4		194.7	135.27	194.7	135.27
62.41	77446	62.41	85190.6		98.34	18468	98.34	18468		98.34	2791	98.34	2791		195.6	134.72	195.6	134.72
62.54	77235	62.54	84958.5		98.64	18411	98.64	18411		98.64	2788.7	98.64	2788.7		196.5	128.37	196.5	128.37
62.68	77136	62.68	84849.6		98.94	18371	98.94	18371		98.94	2768.9	98.94	2768.9		197.4	135.19	197.4	135.19
62.81	77105	62.81	84815.5		99.24	18320	99.24	18320		99.24	2777.4	99.24	2777.4		198.3	127.34	198.3	127.34
62.94	76983	62.94	84681.3		99.54	18269	99.54	18269		99.54	2773.9	99.54	2773.9		199.2	135.77	199.2	135.77
63.07	76946	63.07	84640.6		99.84	18230	99.84	18230		99.84	2759.1	99.84	2759.1		200.1	130.45	200.1	130.45
63.2	76956	63.2	84651.6		100.1	18208	100.1	18208		100.1	2743.5	100.1	2743.5		201	116.81	201	116.81
63.33	76995	63.33	84694.5		100.4	18191	100.4	18191		100.4	2746.2	100.4	2746.2		201.9	125.18	201.9	125.18
63.47	77003	63.47	84703.3		100.7	18158	100.7	18158		100.7	2738.6	100.7	2738.6		202.8	124.64	202.8	124.64
63.6	76888	63.6	84576.8		101	18130	101	18130		101	2728.5	101	2728.5		203.7	133.06	203.7	133.06
63.73	76863	63.73	84549.3		101.3	18091	101.3	18091		101.3	2714.7	101.3	2714.7		204.7	131.02	204.7	131.02
63.86	76805	63.86	84485.5		101.7	18060	101.7	18060		101.7	2712.1	101.7	2712.1		205.6	134.32	205.6	134.32
63.99	76730	63.99	84403		102	18039	102	18039		102	2701.3	102	2701.3		206.5	124.86	206.5	124.86
64.13	76619	64.13	84280.9		102.3	18018	102.3	18018		102.3	2708.4	102.3	2708.4		207.4	100.79	207.4	100.79
64.26	76550	64.26	84205		102.6	17970	102.6	17970		102.6	2686.2	102.6	2686.2		208.4	100.49	208.4	100.49
64.39	76528	64.39	84180.8		102.9	17934	102.9	17934		102.9	2685.8	102.9	2685.8		209.3	99.723	209.3	99.723
64.52	76580	64.52	84238		103.2	17892	103.2	17892		103.2	2674.7	103.2	2674.7		210.3	105.6	210.3	105.6
64.65	76576	64.65	84233.6		103.5	17868	103.5	17868		103.5	2669.8	103.5	2669.8		211.2	108.88	211.2	108.88
64.79	76541	64.79	84195.1		103.8	17849	103.8	17849		103.8	2674.2	103.8	2674.2		212.2	117.13	212.2	117.13
64.92	76486	64.92	84134.6		104.1	17811	104.1	17811		104.1	2669.5	104.1	2669.5		213.1	113.57	213.1	113.57
65.05	76474	65.05	84121.4		104.4	17762	104.4	17762		104.4	2659.5	104.4	2659.5		214.1	117.41	214.1	117.41
65.19	76317	65.19	83948.7		104.7	17727	104.7	17727		104.7	2654.2	104.7	2654.2		215	115.4	215	115.4
65.32	76224	65.32	83846.4		105	17720	105	17720		105	2642.3	105	2642.3		216	112.93	216	112.93
65.45	76163	65.45	83779.3		105.3	17669	105.3	17669		105.3	2638	105.3	2638		217	115.58	217	115.58
65.58	76155	65.58	83770.5		105.7	17611	105.7	17611		105.7	2636.4	105.7	2636.4		217.9	109.86	217.9	109.86
65.72	76186	65.72	83804.6		106	17604	106	17604		106	2632.5	106	2632.5		218.9	116.16	218.9	116.16
65.85	76230	65.85	83853		106.3	17541	106.3	17541		106.3	2616.9	106.3	2616.9		219.9	122.49	219.9	122.49
65.98	76177	65.98	83794.7		106.6	17510	106.6	17510		106.6	2595.1	106.6	2595.1		220.9	99.715	220.9	99.715
66.12	76095	66.12	83704.5		106.9	17481	106.9	17481		106.9	2597.1	106.9	2597.1		221.9	83.857	221.9	83.857
66.25	76008	66.25	83608.8		107.2	17442	107.2	17442		107.2	2584.3	107.2	2584.3		222.9	74.672	222.9	74.672
66.38	75906	66.38	83496.6		107.5	17405	107.5	17405		107.5	2579.9	107.5	2579.9		223.9	68.942	223.9	68.942
66.52	75895	66.52	83484.5		107.9	17372	107.9	17372		107.9	2561	107.9	2561		224.9	59.107	224.9	59.107
66.65	75958	66.65	83553.8		108.2	17326	108.2	17326		108.2	2562.7	108.2	2562.7		225.9	65.985	225.9	65.985
66.78	75999	66.78	83598.9		108.5	17292	108.5	17292		108.5	2554.8	108.5	2554.8		226.9	80.036	226.9	80.036
66.92	75977	66.92	83574.7		108.8	17234	108.8	17234		108.8	2548.8	108.8	2548.8		227.9	84.419	227.9	84.419
67.05	75836	67.05	83419.6		109.1	17222	109.1	17222		109.1	2547.8	109.1	2547.8		228.9	73.91	228.9	73.91
67.18	75776	67.18	83353.6		109.5	17199	109.5	17199		109.5	2533.5	109.5	2533.5		229.9	69.772	229.9	69.772
67.32	75640	67.32	83204		109.8	17185	109.8	17185		109.8	2524.4	109.8	2524.4		231	71.556	231	71.556
67.45	75568	67.45	83124.8		110.1	17166	110.1	17166		110.1	2501.5	110.1	2501.5		232	72.451	232	72.451
67.59	75622	67.59	83184.2		110.4	17125	110.4	17125		110.4	2500.5	110.4	2500.5		233	70.251	233	70.251
67.72	75649	67.72	83213.9		110.7	17103	110.7	17103		110.7	2506.5	110.7	2506.5		234.1	60.912	234.1	60.912
67.85	75588	67.85	83146.8		111.1	17066	111.1	17066		111.1	2491.5	111.1	2491.5		235.1	58.75	235.1	58.75
67.99	75585	67.99	83143.5		111.4	17056	111.4	17056		111.4	2480.4	111.4	2480.4		236.2	57.036	236.2	57.036
68.12	75373	68.12	82910.3		111.7	17038	111.7	17038		111.7	2461.3	111.7	2461.3		237.2	62.853	237.2	62.853
68.26	75331	68.26	82864.1		112	16998	112	16998		112	2455.7	112	2455.7		238.3	65.405	238.3	65.405
68.39	75356	68.39	82891.6		112.4	16963	112.4	16963		112.4	2443.3	112.4	2443.3		239.3	73.606	239.3	73.606
68.52	75404	68.52	82944.4		112.7	16904	112.7	16904		112.7	2439.4	112.7	2439.4		240.4	84.455	240.4	84.455
68.66	75456	68.66	83001.6		113	16860	113	16860		113	2429.6	113	2429.6		241.5	74.931	241.5	74.931
68.79	75348	68.79	82882.8		113.3	16843	113.3	16843		113.3	2436.3	113.3	2436.3		242.5	74.854	242.5	74.854
68.93	75290	68.93	82819		113.7	16812	113.7	16812		113.7	2437.6	113.7	2437.6		243.6	67.385	243.6	67.385
69.06	75277	69.06	82804.7		114	16775	114	16775		114	2429.6	114	2429.6		244.7	79.784	244.7	79.784
69.2	75217	69.2	82738.7		114.3	16750	114.3	16750		114.3	2420.3	114.3	2420.3		245.8	80.559	245.8	80.559
69.33	75184	69.33	82702.4		114.7	16717	114.7	16717		114.7	2413.1	114.7	2413.1		246.9	74.816	246.9	74.816
69.47	75252	69.47	82777.2		115	16699	115	16699		115	2401.9	115	2401.9		248	72.963	248	72.963
69.6	75253	69.6	82778.3		115.3	16670	115.3	16670		115.3	2385.8	115.3	2385.8		249.1	83.124	249.1	83.124
69.74	75080	69.74	82588		115.6	16649	115.6	16649		115.6	2372.5	115.6	2372.5		250.2	80.92	250.2	80.92
69.87	74965	69.87	82461.5		116	16639	116	16639		116	2365.7	116	2365.7		251.3	76.316	251.3	76.316
70.01	74942	70.01	82436.2		116.3	16611	116.3	16611		116.3	2354.3	116.3	2354.3		252.4	72.909	252.4	72.909
70.14	75004	70.14	82504.4		116.6	16573	116.6	16573		116.6	2344	116.6	2344		253.5	69.32	253.5	69.32
70.28	74940	70.28	82434		117	16533	117	16533		117	2335.9	117	2335.9		254.6	65.822	254.6	65.822
70.41	74793	70.41	82272.3		117.3	16526	117.3	16526		117.3	2336.9	117.3	2336.9		255.8	64.565	255.8	64.565
70.55	74630	70.55	82093		117.7	16519	117.7	16519		117.7	2330.8	117.7	2330.8		256.9	62.293	256.9	62.293
70.68	74547	70.68	82001.7		118	16505	118	16505		118	2320.1	118	2320.1		258	60.816	258	60.816
70.82	74608	70.82	82068.8		118.3	16449	118.3	16449		118.3	2319.1	118.3	2319.1		259.2	56.778	259.2	56.778
70.95	74732	70.95	82205.2		118.7	16401	118.7	16401		118.7	2311.8	118.7	2311.8		260.3	64.271	260.3	64.271
71.09	74591	71.09	82050.1		119	16367	119	16367		119	2307.1	119	2307.1		261.5	58.862	261.5	58.862
71.23	74482	71.23	81930.2		119.3	16353	119.3	16353		119.3	2298	119.3	2298		262.6	52.029	262.6	52.029
71.36	74375	71.36	81812.5		119.7	16328	119.7	16328		119.7	2275.1	119.7	2275.1		263.8	51.235	263.8	51.235
71.5	74360	71.5	81796		120	16283	120	16283		120	2276.8	120	2276.8		264.9	57.858	264.9	57.858
71.63	74457	71.63	81902.7		120.4	16254	120.4	16254		120.4	2282.4	120.4	2282.4		266.1	72.305	266.1	72.305
71.77	74427	71.77	81869.7		120.7	16205	120.7	16205		120.7	2267.4	120.7	2267.4		267.3	93.65	267.3	93.65
71.91	74239	71.91	81662.9		121.1	16185	121.1	16185		121.1	2265.5	121.1	2265.5		268.5	97.821	268.5	97.821
72.04	74100	72.04	81510		121.4	16122	121.4	16122		121.4	2267.4	121.4	2267.4		269.6	82.006	269.6	82.006
72.18	74060	72.18	81466		121.7	16056	121.7	16056		121.7	2256.4	121.7	2256.4		270.8	71.183	270.8	71.183
72.31	74049	72.31	81453.9		122.1	16011	122.1	16011		122.1	2256.4	122.1	2256.4		272	62.025	272	62.025
72.45	74082	72.45	81490.2		122.4	15989	122.4	15989		122.4	2249.5	122.4	2249.5		273.2	59.244	273.2	59.244
72.59	73988	72.59	81386.8		122.8	15977	122.8	15977		122.8	2237.2	122.8	2237.2		274.4	64.974	274.4	64.974
72.72	73837	72.72	81220.7		123.1	15965	123.1	15965		123.1	2222.7	123.1	2222.7		275.6	60.216	275.6	60.216
72.86	73940	72.86	81334		123.5	15950	123.5	15950		123.5	2209.8	123.5	2209.8		276.8	51.353	276.8	51.353
73	74029	73	81431.9		123.8	15947	123.8	15947		123.8	2203.1	123.8	2203.1		278.1	53.148	278.1	53.148
73.13	74035	73.13	81438.5		124.2	15916	124.2	15916		124.2	2196.4	124.2	2196.4		279.3	60.644	279.3	60.644
73.27	73978	73.27	81375.8		124.5	15888	124.5	15888		124.5	2193	124.5	2193		280.5	62.027	280.5	62.027
73.41	73833	73.41	81216.3		124.9	15855	124.9	15855		124.9	2179.9	124.9	2179.9		281.7	55.092	281.7	55.092
73.54	73860	73.54	81246		125.2	15817	125.2	15817		125.2	2170.4	125.2	2170.4		283	53.227	283	53.227
73.68	73973	73.68	81370.3		125.6	15786	125.6	15786		125.6	2166.6	125.6	2166.6		284.2	53.247	284.2	53.247
73.82	73905	73.82	81295.5		125.9	15732	125.9	15732		125.9	2159.5	125.9	2159.5		285.5	51.043	285.5	51.043
73.95	73708	73.95	81078.8		126.3	15713	126.3	15713		126.3	2164.5	126.3	2164.5		286.7	54.47	286.7	54.47
74.09	73694	74.09	81063.4		126.6	15714	126.6	15714		126.6	2146.9	126.6	2146.9		288	61.504	288	61.504
74.23	73794	74.23	81173.4		127	15697	127	15697		127	2140.3	127	2140.3		289.2	61.018	289.2	61.018
74.37	73788	74.37	81166.8		127.3	15690	127.3	15690		127.3	2149.7	127.3	2149.7		290.5	56.558	290.5	56.558
74.5	73665	74.5	81031.5		127.7	15676	127.7	15676		127.7	2144.7	127.7	2144.7		291.8	53.911	291.8	53.911
74.64	73634	74.64	80997.4		128.1	15652	128.1	15652		128.1	2142.1	128.1	2142.1		293	60.629	293	60.629
74.78	73620	74.78	80982		128.4	15632	128.4	15632		128.4	2118.6	128.4	2118.6		294.3	63.234	294.3	63.234
74.92	73759	74.92	81134.9		128.8	15591	128.8	15591		128.8	2103.7	128.8	2103.7		295.6	76.486	295.6	76.486
75.05	73556	75.05	80911.6		129.1	15568	129.1	15568		129.1	2078.8	129.1	2078.8		296.9	63.066	296.9	63.066
75.19	73402	75.19	80742.2		129.5	15499	129.5	15499		129.5	2070.9	129.5	2070.9		298.2	48.285	298.2	48.285
75.33	73432	75.33	80775.2		129.9	15441	129.9	15441		129.9	2054	129.9	2054		299.5	49.044	299.5	49.044
75.47	73407	75.47	80747.7		130.2	15439	130.2	15439		130.2	2035.9	130.2	2035.9		300.8	49.371	300.8	49.371
75.6	73344	75.6	80678.4		130.6	15440	130.6	15440		130.6	2033.2	130.6	2033.2		302.1	42.347	302.1	42.347
75.74	73259	75.74	80584.9		130.9	15397	130.9	15397		130.9	2039.7	130.9	2039.7		303.4	62.907	303.4	62.907
75.88	73266	75.88	80592.6		131.3	15373	131.3	15373		131.3	2036.8	131.3	2036.8		304.8	65.001	304.8	65.001
76.02	73408	76.02	80748.8		131.7	15317	131.7	15317		131.7	2039.9	131.7	2039.9		306.1	81.944	306.1	81.944
76.16	73318	76.16	80649.8		132	15274	132	15274		132	2028.9	132	2028.9		307.4	78.013	307.4	78.013
76.3	73149	76.3	80463.9		132.4	15261	132.4	15261		132.4	2025.5	132.4	2025.5		308.8	75.278	308.8	75.278
76.43	73132	76.43	80445.2		132.8	15253	132.8	15253		132.8	2034.8	132.8	2034.8		310.1	83.885	310.1	83.885
76.57	73203	76.57	80523.3		133.1	15221	133.1	15221		133.1	2039.9	133.1	2039.9		311.4	87.395	311.4	87.395
76.71	73183	76.71	80501.3		133.5	15180	133.5	15180		133.5	2030.5	133.5	2030.5		312.8	69.85	312.8	69.85
76.85	72978	76.85	80275.8		133.9	15152	133.9	15152		133.9	2030	133.9	2030		314.2	71.333	314.2	71.333
76.99	72909	76.99	80199.9		134.2	15140	134.2	15140		134.2	2022.2	134.2	2022.2		315.5	59.445	315.5	59.445
77.13	73081	77.13	80389.1		134.6	15120	134.6	15120		134.6	2026.4	134.6	2026.4		316.9	48.153	316.9	48.153
77.27	72980	77.27	80278		135	15098	135	15098		135	2023.6	135	2023.6		318.3	32.698	318.3	32.698
77.4	72835	77.4	80118.5		135.3	15073	135.3	15073		135.3	2000.5	135.3	2000.5		319.7	29.861	319.7	29.861
77.54	72879	77.54	80166.9		135.7	15059	135.7	15059		135.7	1991.3	135.7	1991.3		321	31.071	321	31.071
77.68	72945	77.68	80239.5		136.1	15032	136.1	15032		136.1	1980.1	136.1	1980.1		322.4	32.486	322.4	32.486
77.82	72835	77.82	80118.5		136.5	15007	136.5	15007		136.5	1993.4	136.5	1993.4		323.8	47.355	323.8	47.355
77.96	72704	77.96	79974.4		136.8	14975	136.8	14975		136.8	1982.5	136.8	1982.5		325.2	53.877	325.2	53.877
78.1	72794	78.1	80073.4		137.2	14960	137.2	14960		137.2	1978.6	137.2	1978.6		326.7	63.866	326.7	63.866
78.24	72806	78.24	80086.6		137.6	14934	137.6	14934		137.6	1980.2	137.6	1980.2		328.1	51.122	328.1	51.122
78.38	72622	78.38	79884.2		138	14908	138	14908		138	1964.5	138	1964.5		329.5	51.532	329.5	51.532
78.52	72644	78.52	79908.4		138.3	14892	138.3	14892		138.3	1961.4	138.3	1961.4		330.9	43.559	330.9	43.559
78.66	72728	78.66	80000.8		138.7	14858	138.7	14858		138.7	1948	138.7	1948		332.4	32.37	332.4	32.37
78.8	72666	78.8	79932.6		139.1	14828	139.1	14828		139.1	1940.4	139.1	1940.4		333.8	29.875	333.8	29.875
78.94	72489	78.94	79737.9		139.5	14806	139.5	14806		139.5	1933.6	139.5	1933.6		335.2	59.153	335.2	59.153
79.08	72514	79.08	79765.4		139.9	14773	139.9	14773		139.9	1921.2	139.9	1921.2		336.7	58.218	336.7	58.218
79.22	72588	79.22	79846.8		140.2	14749	140.2	14749		140.2	1912.6	140.2	1912.6		338.2	72.413	338.2	72.413
79.35	72382	79.35	79620.2		140.6	14728	140.6	14728		140.6	1909.6	140.6	1909.6		339.6	65.412	339.6	65.412
79.49	72381	79.49	79619.1		141	14676	141	14676		141	1909.3	141	1909.3		341.1	51.258	341.1	51.258
79.63	72448	79.63	79692.8		141.4	14645	141.4	14645		141.4	1910.6	141.4	1910.6		342.6	49.095	342.6	49.095
79.77	72395	79.77	79634.5		141.8	14597	141.8	14597		141.8	1906.8	141.8	1906.8		344	58.894	344	58.894
79.91	72202	79.91	79422.2		142.2	14552	142.2	14552		142.2	1904.6	142.2	1904.6		345.5	42.159	345.5	42.159
80.06	72219	80.06	79440.9		142.6	14511	142.6	14511		142.6	1906	142.6	1906		347	41.883	347	41.883
80.2	72279	80.2	79506.9		142.9	14443	142.9	14443		142.9	1903.6	142.9	1903.6		348.5	46.63	348.5	46.63
80.34	72039	80.34	79242.9		143.3	14323	143.3	14323		143.3	1886.1	143.3	1886.1		350	63.534	350	63.534
80.48	72107	80.48	79317.7		143.7	14283	143.7	14283		143.7	1874.4	143.7	1874.4		351.5	74.099	351.5	74.099
80.62	72220	80.62	79442		144.1	14240	144.1	14240		144.1	1873.3	144.1	1873.3		353.1	66.358	353.1	66.358
80.76	72106	80.76	79316.6		144.5	14202	144.5	14202		144.5	1875.4	144.5	1875.4		354.6	64.134	354.6	64.134
80.9	71934	80.9	79127.4		144.9	14180	144.9	14180		144.9	1868.8	144.9	1868.8		356.1	75.169	356.1	75.169
81.04	72076	81.04	79283.6		145.3	14177	145.3	14177		145.3	1869.6	145.3	1869.6		357.6	70.97	357.6	70.97
81.18	72029	81.18	79231.9		145.7	14189	145.7	14189		145.7	1853.8	145.7	1853.8		359.2	52.164	359.2	52.164
81.32	71823	81.32	79005.3		146.1	14180	146.1	14180		146.1	1832.8	146.1	1832.8		360.7	41.641	360.7	41.641
81.46	71966	81.46	79162.6		146.5	14151	146.5	14151		146.5	1824.7	146.5	1824.7		362.3	56.751	362.3	56.751
81.6	72049	81.6	79253.9		146.9	14123	146.9	14123		146.9	1806.2	146.9	1806.2		363.8	58.547	363.8	58.547
81.74	71815	81.74	78996.5		147.2	14097	147.2	14097		147.2	1801.9	147.2	1801.9		365.4	52.089	365.4	52.089
81.88	71818	81.88	78999.8		147.6	14082	147.6	14082		147.6	1805	147.6	1805		367	40.112	367	40.112
82.02	71886	82.02	79074.6		148	14085	148	14085		148	1806.5	148	1806.5		368.6	37.008	368.6	37.008
82.17	71671	82.17	78838.1		148.4	14095	148.4	14095		148.4	1810.9	148.4	1810.9		370.1	52.853	370.1	52.853
82.31	71766	82.31	78942.6		148.8	14077	148.8	14077		148.8	1803.5	148.8	1803.5		371.7	51.987	371.7	51.987
82.45	71807	82.45	78987.7		149.2	14024	149.2	14024		149.2	1797.9	149.2	1797.9		373.3	37.543	373.3	37.543
82.59	71607	82.59	78767.7		149.6	14014	149.6	14014		149.6	1774.8	149.6	1774.8		374.9	42.967	374.9	42.967
82.73	71649	82.73	78813.9		150	13982	150	13982		150	1767.8	150	1767.8		376.6	49.627	376.6	49.627
82.87	71660	82.87	78826		150.4	13965	150.4	13965		150.4	1756.9	150.4	1756.9		378.2	54.186	378.2	54.186
83.01	71517	83.01	78668.7		150.8	13947	150.8	13947		150.8	1762.3	150.8	1762.3		379.8	51.464	379.8	51.464
83.16	71511	83.16	78662.1		151.2	13969	151.2	13969		151.2	1748.1	151.2	1748.1		381.4	23.367	381.4	23.367
83.3	71512	83.3	78663.2		151.6	13955	151.6	13955		151.6	1742.7	151.6	1742.7		383.1	15.266	383.1	15.266
83.44	71403	83.44	78543.3		152.1	13966	152.1	13966		152.1	1741.5	152.1	1741.5		384.7	22.255	384.7	22.255
83.58	71402	83.58	78542.2		152.5	13939	152.5	13939		152.5	1724.3	152.5	1724.3
83.72	71433	83.72	78576.3		152.9	13922	152.9	13922		152.9	1719.7	152.9	1719.7
83.87	71370	83.87	78507		153.3	13893	153.3	13893		153.3	1700.5	153.3	1700.5
84.01	71280	84.01	78408		153.7	13826	153.7	13826		153.7	1693.1	153.7	1693.1
84.15	71384	84.15	78522.4		154.1	13803	154.1	13803		154.1	1682	154.1	1682
84.29	71175	84.29	78292.5		154.5	13791	154.5	13791		154.5	1687	154.5	1687
84.43	71166	84.43	78282.6		154.9	13800	154.9	13800		154.9	1685.2	154.9	1685.2
84.58	71358	84.58	78493.8		155.3	13813	155.3	13813		155.3	1682	155.3	1682
84.72	71091	84.72	78200.1		155.7	13795	155.7	13795		155.7	1676.8	155.7	1676.8
84.86	71152	84.86	78267.2		156.2	13718	156.2	13718		156.2	1658.7	156.2	1658.7
85.01	71117	85.01	78228.7		156.6	13703	156.6	13703		156.6	1660.9	156.6	1660.9
85.15	70973	85.15	78070.3		157	13703	157	13703		157	1662.9	157	1662.9
85.29	71074	85.29	78181.4		157.4	13660	157.4	13660		157.4	1667.8	157.4	1667.8
85.43	71012	85.43	78113.2		157.8	13602	157.8	13602		157.8	1675.7	157.8	1675.7
85.58	70861	85.58	77947.1		158.2	13611	158.2	13611		158.2	1676.9	158.2	1676.9
85.72	70911	85.72	78002.1		158.6	13636	158.6	13636		158.6	1668.1	158.6	1668.1
85.86	70877	85.86	77964.7		159.1	13635	159.1	13635		159.1	1673.1	159.1	1673.1
86.01	70814	86.01	77895.4		159.5	13606	159.5	13606		159.5	1667.4	159.5	1667.4
86.15	70905	86.15	77995.5		159.9	13545	159.9	13545		159.9	1649.9	159.9	1649.9
86.29	70760	86.29	77836		160.3	13486	160.3	13486		160.3	1641.9	160.3	1641.9
86.44	70867	86.44	77953.7		160.8	13416	160.8	13416		160.8	1632.8	160.8	1632.8
86.58	70784	86.58	77862.4		161.2	13341	161.2	13341		161.2	1637.4	161.2	1637.4
86.72	70615	86.72	77676.5		161.6	13275	161.6	13275		161.6	1648.3	161.6	1648.3
86.87	70705	86.87	77775.5		162	13267	162	13267		162	1647.6	162	1647.6
87.01	70665	87.01	77731.5		162.5	13237	162.5	13237		162.5	1633.1	162.5	1633.1
87.15	70581	87.15	77639.1		162.9	13199	162.9	13199		162.9	1620.2	162.9	1620.2
87.3	70597	87.3	77656.7		163.3	13096	163.3	13096		163.3	1627.1	163.3	1627.1
87.44	70405	87.44	77445.5		163.7	13057	163.7	13057		163.7	1619.6	163.7	1619.6
87.58	70439	87.58	77482.9		164.2	13011	164.2	13011		164.2	1610.6	164.2	1610.6
87.73	70487	87.73	77535.7		164.6	12977	164.6	12977		164.6	1607.7	164.6	1607.7
87.87	70316	87.87	77347.6		165	12937	165	12937		165	1577.8	165	1577.8
88.02	70425	88.02	77467.5		165.5	12890	165.5	12890		165.5	1564.6	165.5	1564.6
88.16	70367	88.16	77403.7		165.9	12882	165.9	12882		165.9	1569.8	165.9	1569.8
88.31	70252	88.31	77277.2		166.3	12905	166.3	12905		166.3	1582.1	166.3	1582.1
88.45	70324	88.45	77356.4		166.8	12903	166.8	12903		166.8	1585.2	166.8	1585.2
88.59	70076	88.59	77083.6		167.2	12894	167.2	12894		167.2	1579.8	167.2	1579.8
88.74	70331	88.74	77364.1		167.6	12946	167.6	12946		167.6	1581.1	167.6	1581.1
88.88	70107	88.88	77117.7		168.1	12998	168.1	12998		168.1	1571.5	168.1	1571.5
89.03	70169	89.03	77185.9		168.5	13014	168.5	13014		168.5	1558.5	168.5	1558.5
89.17	70214	89.17	77235.4		168.9	13013	168.9	13013		168.9	1558.8	168.9	1558.8
89.32	70078	89.32	77085.8		169.4	13020	169.4	13020		169.4	1558.5	169.4	1558.5
89.46	70166	89.46	77182.6		169.8	12994	169.8	12994		169.8	1559.9	169.8	1559.9
89.61	69940	89.61	76934		170.3	12971	170.3	12971		170.3	1551.9	170.3	1551.9
89.75	70025	89.75	77027.5		170.7	12957	170.7	12957		170.7	1547.5	170.7	1547.5
89.9	70033	89.9	77036.3		171.2	12936	171.2	12936		171.2	1543.3	171.2	1543.3
90.04	70007	90.04	77007.7		171.6	12930	171.6	12930		171.6	1528.8	171.6	1528.8
90.19	70088	90.19	77096.8		172	12843	172	12843		172	1535.6	172	1535.6
90.33	69892	90.33	76881.2		172.5	12738	172.5	12738		172.5	1526.4	172.5	1526.4
90.48	69958	90.48	76953.8		172.9	12662	172.9	12662		172.9	1522.4	172.9	1522.4
90.62	69864	90.62	76850.4		173.4	12662	173.4	12662		173.4	1513.2	173.4	1513.2
90.77	69699	90.77	76668.9		173.8	12614	173.8	12614		173.8	1513.5	173.8	1513.5
90.92	69876	90.92	76863.6		174.3	12640	174.3	12640		174.3	1510.5	174.3	1510.5
91.06	69633	91.06	76596.3		174.7	12667	174.7	12667		174.7	1491.3	174.7	1491.3
91.21	69687	91.21	76655.7		175.2	12637	175.2	12637		175.2	1498.7	175.2	1498.7
91.35	69512	91.35	76463.2		175.6	12644	175.6	12644		175.6	1489.8	175.6	1489.8
91.5	69609	91.5	76569.9		176.1	12637	176.1	12637		176.1	1483.4	176.1	1483.4
91.64	69559	91.64	76514.9		176.5	12628	176.5	12628		176.5	1477.3	176.5	1477.3
91.79	69399	91.79	76338.9		177	12614	177	12614		177	1474.8	177	1474.8
91.94	69598	91.94	76557.8		177.5	12582	177.5	12582		177.5	1483.7	177.5	1483.7
92.08	69293	92.08	76222.3		177.9	12544	177.9	12544		177.9	1474.5	177.9	1474.5
92.23	69443	92.23	76387.3		178.4	12511	178.4	12511		178.4	1475.6	178.4	1475.6
92.38	69363	92.38	76299.3		178.8	12505	178.8	12505		178.8	1475	178.8	1475
92.52	69332	92.52	76265.2		179.3	12473	179.3	12473		179.3	1476.9	179.3	1476.9
92.67	69295	92.67	76224.5		179.8	12445	179.8	12445		179.8	1465.2	179.8	1465.2
92.82	69288	92.82	76216.8		180.2	12415	180.2	12415		180.2	1456.8	180.2	1456.8
92.96	69210	92.96	76131		180.7	12370	180.7	12370		180.7	1437.8	180.7	1437.8
93.11	69165	93.11	76081.5		181.1	12330	181.1	12330		181.1	1429.9	181.1	1429.9
93.26	69275	93.26	76202.5		181.6	12310	181.6	12310		181.6	1432.1	181.6	1432.1
93.4	69065	93.4	75971.5		182.1	12274	182.1	12274		182.1	1426.6	182.1	1426.6
93.55	69197	93.55	76116.7		182.5	12250	182.5	12250		182.5	1422.2	182.5	1422.2
93.7	69053	93.7	75958.3		183	12226	183	12226		183	1430.7	183	1430.7
93.84	69136	93.84	76049.6		183.5	12222	183.5	12222		183.5	1417.4	183.5	1417.4
93.99	68947	93.99	75841.7		183.9	12205	183.9	12205		183.9	1436	183.9	1436
94.14	69108	94.14	76018.8		184.4	12178	184.4	12178		184.4	1440	184.4	1440
94.28	69030	94.28	75933		184.9	12171	184.9	12171		184.9	1459.6	184.9	1459.6
94.43	68956	94.43	75851.6		185.4	12161	185.4	12161		185.4	1452.9	185.4	1452.9
94.58	69011	94.58	75912.1		185.8	12158	185.8	12158		185.8	1430	185.8	1430
94.73	68990	94.73	75889		186.3	12143	186.3	12143		186.3	1426.7	186.3	1426.7
94.87	68929	94.87	75821.9		186.8	12113	186.8	12113		186.8	1419	186.8	1419
95.02	68828	95.02	75710.8		187.3	12080	187.3	12080		187.3	1414.7	187.3	1414.7
95.17	68907	95.17	75797.7		187.7	12056	187.7	12056		187.7	1410.5	187.7	1410.5
95.32	68873	95.32	75760.3		188.2	12024	188.2	12024		188.2	1395.2	188.2	1395.2
95.47	68831	95.47	75714.1		188.7	11950	188.7	11950		188.7	1406.2	188.7	1406.2
95.61	68655	95.61	75520.5		189.2	11882	189.2	11882		189.2	1390.7	189.2	1390.7
95.76	68869	95.76	75755.9		189.6	11826	189.6	11826		189.6	1365	189.6	1365
95.91	68618	95.91	75479.8		190.1	11808	190.1	11808		190.1	1362.9	190.1	1362.9
96.06	68747	96.06	75621.7		190.6	11800	190.6	11800		190.6	1365.1	190.6	1365.1
96.21	68469	96.21	75315.9		191.1	11809	191.1	11809		191.1	1363	191.1	1363
96.35	68681	96.35	75549.1		191.6	11852	191.6	11852		191.6	1364.1	191.6	1364.1
96.5	68513	96.5	75364.3		192.1	11856	192.1	11856		192.1	1360.8	192.1	1360.8
96.65	68589	96.65	75447.9		192.6	11852	192.6	11852		192.6	1348.5	192.6	1348.5
96.8	68339	96.8	75172.9		193	11861	193	11861		193	1344.4	193	1344.4
96.95	68457	96.95	75302.7		193.5	11827	193.5	11827		193.5	1354.3	193.5	1354.3
97.1	68329	97.1	75161.9		194	11794	194	11794		194	1358.4	194	1358.4
97.25	68475	97.25	75322.5		194.5	11777	194.5	11777		194.5	1335.1	194.5	1335.1
97.4	68292	97.4	75121.2		195	11763	195	11763		195	1328.7	195	1328.7
97.54	68329	97.54	75161.9		195.5	11714	195.5	11714		195.5	1313.5	195.5	1313.5
97.69	68253	97.69	75078.3		196	11663	196	11663		196	1317	196	1317
97.84	68363	97.84	75199.3		196.5	11666	196.5	11666		196.5	1297.5	196.5	1297.5
97.99	68182	97.99	75000.2		197	11654	197	11654		197	1290.2	197	1290.2
98.14	68280	98.14	75108		197.5	11633	197.5	11633		197.5	1278.6	197.5	1278.6
98.29	68039	98.29	74842.9		198	11619	198	11619		198	1265.7	198	1265.7
98.44	68088	98.44	74896.8		198.5	11584	198.5	11584		198.5	1272.3	198.5	1272.3
98.59	68042	98.59	74846.2		199	11535	199	11535		199	1268.4	199	1268.4
98.74	68145	98.74	74959.5		199.5	11431	199.5	11431		199.5	1266.7	199.5	1266.7
98.89	68000	98.89	74800		200	11389	200	11389		200	1257.1	200	1257.1
99.04	68024	99.04	74826.4		200.5	11367	200.5	11367		200.5	1259.9	200.5	1259.9
99.19	67852	99.19	74637.2		201	11314	201	11314		201	1256.2	201	1256.2
99.34	67905	99.34	74695.5		201.5	11312	201.5	11312		201.5	1250.7	201.5	1250.7
99.49	67831	99.49	74614.1		202	11353	202	11353		202	1233.5	202	1233.5
99.64	67959	99.64	74754.9		202.5	11403	202.5	11403		202.5	1243.6	202.5	1243.6
99.79	67927	99.79	74719.7		203	11420	203	11420		203	1241.8	203	1241.8
99.94	67898	99.94	74687.8		203.5	11405	203.5	11405		203.5	1241.3	203.5	1241.3
100.1	67805	100.1	74585.5		204	11401	204	11401		204	1240.3	204	1240.3
100.2	67702	100.2	74472.2		204.5	11395	204.5	11395		204.5	1240.4	204.5	1240.4
100.4	67698	100.4	74467.8		205	11363	205	11363		205	1235.1	205	1235.1
100.5	67608	100.5	74368.8		205.5	11348	205.5	11348		205.5	1236.9	205.5	1236.9
100.7	67648	100.7	74412.8		206.1	11313	206.1	11313		206.1	1226	206.1	1226
100.8	67587	100.8	74345.7		206.6	11288	206.6	11288		206.6	1232.8	206.6	1232.8
101	67692	101	74461.2		207.1	11248	207.1	11248		207.1	1232.2	207.1	1232.2
101.1	67525	101.1	74277.5		207.6	11203	207.6	11203		207.6	1225.5	207.6	1225.5
101.3	67707	101.3	74477.7		208.1	11168	208.1	11168		208.1	1196.8	208.1	1196.8
101.4	67561	101.4	74317.1		208.6	11150	208.6	11150		208.6	1196.9	208.6	1196.9
101.6	67533	101.6	74286.3		209.2	11135	209.2	11135		209.2	1198.5	209.2	1198.5
101.7	67537	101.7	74290.7		209.7	11092	209.7	11092		209.7	1189.1	209.7	1189.1
101.9	67407	101.9	74147.7		210.2	11073	210.2	11073		210.2	1179	210.2	1179
102	67472	102	74219.2		210.7	11074	210.7	11074		210.7	1210.6	210.7	1210.6
102.2	67324	102.2	74056.4		211.3	11064	211.3	11064		211.3	1229	211.3	1229
102.3	67382	102.3	74120.2		211.8	11047	211.8	11047		211.8	1219.2	211.8	1219.2
102.5	67235	102.5	73958.5		212.3	11014	212.3	11014		212.3	1219.5	212.3	1219.5
102.7	67315	102.7	74046.5		212.8	11038	212.8	11038		212.8	1220.5	212.8	1220.5
102.8	67161	102.8	73877.1		213.4	11025	213.4	11025		213.4	1216.8	213.4	1216.8
103	67283	103	74011.3		213.9	10998	213.9	10998		213.9	1212.7	213.9	1212.7
103.1	67249	103.1	73973.9		214.4	10978	214.4	10978		214.4	1206.2	214.4	1206.2
103.3	67171	103.3	73888.1		215	10982	215	10982		215	1199.2	215	1199.2
103.4	67191	103.4	73910.1		215.5	10954	215.5	10954		215.5	1194.5	215.5	1194.5
103.6	67093	103.6	73802.3		216	10979	216	10979		216	1174.7	216	1174.7
103.7	67142	103.7	73856.2		216.6	10958	216.6	10958		216.6	1171.3	216.6	1171.3
103.9	67039	103.9	73742.9		217.1	10907	217.1	10907		217.1	1157.8	217.1	1157.8
104	67062	104	73768.2		217.6	10857	217.6	10857		217.6	1144.3	217.6	1144.3
104.2	67048	104.2	73752.8		218.2	10816	218.2	10816		218.2	1129.8	218.2	1129.8
104.3	66912	104.3	73603.2		218.7	10770	218.7	10770		218.7	1141.1	218.7	1141.1
104.5	67082	104.5	73790.2		219.2	10740	219.2	10740		219.2	1151.9	219.2	1151.9
104.6	66880	104.6	73568		219.8	10681	219.8	10681		219.8	1146.8	219.8	1146.8
104.8	66922	104.8	73614.2		220.3	10624	220.3	10624		220.3	1147.3	220.3	1147.3
104.9	66848	104.9	73532.8		220.9	10586	220.9	10586		220.9	1142.5	220.9	1142.5
105.1	66733	105.1	73406.3		221.4	10588	221.4	10588		221.4	1145	221.4	1145
105.2	66896	105.2	73585.6		222	10608	222	10608		222	1144.8	222	1144.8
105.4	66629	105.4	73291.9		222.5	10622	222.5	10622		222.5	1130.2	222.5	1130.2
105.5	66747	105.5	73421.7		223.1	10646	223.1	10646		223.1	1125.3	223.1	1125.3
105.7	66672	105.7	73339.2		223.6	10652	223.6	10652		223.6	1117.7	223.6	1117.7
105.9	66616	105.9	73277.6		224.2	10643	224.2	10643		224.2	1106.8	224.2	1106.8
106	66672	106	73339.2		224.7	10638	224.7	10638		224.7	1086.5	224.7	1086.5
106.2	66505	106.2	73155.5		225.3	10622	225.3	10622		225.3	1086.5	225.3	1086.5
106.3	66608	106.3	73268.8		225.8	10595	225.8	10595		225.8	1084.5	225.8	1084.5
106.5	66571	106.5	73228.1		226.4	10567	226.4	10567		226.4	1085	226.4	1085
106.6	66491	106.6	73140.1		226.9	10501	226.9	10501		226.9	1114.3	226.9	1114.3
106.8	66625	106.8	73287.5		227.5	10445	227.5	10445		227.5	1120.3	227.5	1120.3
106.9	66484	106.9	73132.4		228	10415	228	10415		228	1110.2	228	1110.2
107.1	66516	107.1	73167.6		228.6	10424	228.6	10424		228.6	1106.8	228.6	1106.8
107.2	66451	107.2	73096.1		229.2	10451	229.2	10451		229.2	1101.2	229.2	1101.2
107.4	66356	107.4	72991.6		229.7	10453	229.7	10453		229.7	1095.7	229.7	1095.7
107.5	66439	107.5	73082.9		230.3	10446	230.3	10446		230.3	1088.4	230.3	1088.4
107.7	66307	107.7	72937.7		230.8	10418	230.8	10418		230.8	1080.2	230.8	1080.2
107.8	66285	107.8	72913.5		231.4	10397	231.4	10397		231.4	1091.3	231.4	1091.3
108	66354	108	72989.4		232	10376	232	10376		232	1096.9	232	1096.9
108.2	66278	108.2	72905.8		232.5	10298	232.5	10298		232.5	1098.5	232.5	1098.5
108.3	66363	108.3	72999.3		233.1	10246	233.1	10246		233.1	1083.8	233.1	1083.8
108.5	66297	108.5	72926.7		233.7	10235	233.7	10235		233.7	1079.6	233.7	1079.6
108.6	66121	108.6	72733.1		234.2	10245	234.2	10245		234.2	1076.6	234.2	1076.6
108.8	66192	108.8	72811.2		234.8	10224	234.8	10224		234.8	1062.9	234.8	1062.9
108.9	66115	108.9	72726.5		235.4	10175	235.4	10175		235.4	1054.2	235.4	1054.2
109.1	66079	109.1	72686.9		236	10151	236	10151		236	1048.2	236	1048.2
109.2	66191	109.2	72810.1		236.5	10136	236.5	10136		236.5	1039.3	236.5	1039.3
109.4	66088	109.4	72696.8		237.1	10094	237.1	10094		237.1	1037.1	237.1	1037.1
109.5	66045	109.5	72649.5		237.7	10047	237.7	10047		237.7	1035.4	237.7	1035.4
109.7	66078	109.7	72685.8		238.3	10011	238.3	10011		238.3	1037.5	238.3	1037.5
109.9	65952	109.9	72547.2		238.8	9988	238.8	9988		238.8	1024.2	238.8	1024.2
110	65923	110	72515.3		239.4	10011	239.4	10011		239.4	1023.8	239.4	1023.8
110.2	65949	110.2	72543.9		240	10024	240	10024		240	1028.8	240	1028.8
110.3	65935	110.3	72528.5		240.6	10034	240.6	10034		240.6	1030.4	240.6	1030.4
110.5	65851	110.5	72436.1		241.2	10017	241.2	10017		241.2	1025.9	241.2	1025.9
110.6	65880	110.6	72468		241.8	9961.3	241.8	9961.3		241.8	1027.9	241.8	1027.9
110.8	65765	110.8	72341.5		242.3	9891.1	242.3	9891.1		242.3	1024.7	242.3	1024.7
110.9	65803	110.9	72383.3		242.9	9791.3	242.9	9791.3		242.9	1036.8	242.9	1036.8
111.1	65860	111.1	72446		243.5	9784.6	243.5	9784.6		243.5	1038	243.5	1038
111.3	65797	111.3	72376.7		244.1	9856.3	244.1	9856.3		244.1	1028.9	244.1	1028.9
111.4	65737	111.4	72310.7		244.7	9880.4	244.7	9880.4		244.7	1011.7	244.7	1011.7
111.6	65697	111.6	72266.7		245.3	9887.8	245.3	9887.8		245.3	996.15	245.3	996.15
111.7	65705	111.7	72275.5		245.9	9890.3	245.9	9890.3		245.9	974.39	245.9	974.39
111.9	65755	111.9	72330.5		246.5	9860.4	246.5	9860.4		246.5	969.58	246.5	969.58
112	65729	112	72301.9		247.1	9836.8	247.1	9836.8		247.1	963.37	247.1	963.37
112.2	65619	112.2	72180.9		247.7	9875.1	247.7	9875.1		247.7	984.37	247.7	984.37
112.4	65720	112.4	72292		248.3	9886.2	248.3	9886.2		248.3	1001.3	248.3	1001.3
112.5	65746	112.5	72320.6		248.9	9840.3	248.9	9840.3		248.9	1002.3	248.9	1002.3
112.7	65584	112.7	72142.4		249.5	9762.7	249.5	9762.7		249.5	998.23	249.5	998.23
112.8	65549	112.8	72103.9		250.1	9704.4	250.1	9704.4		250.1	976.15	250.1	976.15
113	65692	113	72261.2		250.7	9693.7	250.7	9693.7		250.7	968.73	250.7	968.73
113.1	65578	113.1	72135.8		251.3	9675.9	251.3	9675.9		251.3	948.02	251.3	948.02
113.3	65490	113.3	72039		251.9	9690	251.9	9690		251.9	940.23	251.9	940.23
113.4	65534	113.4	72087.4		252.5	9699.3	252.5	9699.3		252.5	946.72	252.5	946.72
113.6	65579	113.6	72136.9		253.1	9662	253.1	9662		253.1	945.6	253.1	945.6
113.8	65512	113.8	72063.2		253.7	9655.5	253.7	9655.5		253.7	941.38	253.7	941.38
113.9	65521	113.9	72073.1		254.3	9651.7	254.3	9651.7		254.3	939.15	254.3	939.15
114.1	65507	114.1	72057.7		254.9	9529.2	254.9	9529.2		254.9	926.55	254.9	926.55
114.2	65541	114.2	72095.1		255.6	9458.2	255.6	9458.2		255.6	924.19	255.6	924.19
114.4	65482	114.4	72030.2		256.2	9414.9	256.2	9414.9		256.2	935.66	256.2	935.66
114.5	65452	114.5	71997.2		256.8	9420.4	256.8	9420.4		256.8	936.93	256.8	936.93
114.7	65445	114.7	71989.5		257.4	9442.9	257.4	9442.9		257.4	931.4	257.4	931.4
114.9	65348	114.9	71882.8		258	9407.8	258	9407.8		258	918.08	258	918.08
115	65344	115	71878.4		258.6	9381.4	258.6	9381.4		258.6	914.65	258.6	914.65
115.2	65321	115.2	71853.1		259.3	9364.5	259.3	9364.5		259.3	886.87	259.3	886.87
115.3	65235	115.3	71758.5		259.9	9319	259.9	9319		259.9	892.98	259.9	892.98
115.5	65208	115.5	71728.8		260.5	9316.9	260.5	9316.9		260.5	880.61	260.5	880.61
115.7	65228	115.7	71750.8		261.1	9314.8	261.1	9314.8		261.1	889.46	261.1	889.46
115.8	65087	115.8	71595.7		261.8	9342.8	261.8	9342.8		261.8	883.88	261.8	883.88
116	65080	116	71588		262.4	9346.1	262.4	9346.1		262.4	895.37	262.4	895.37
116.1	65124	116.1	71636.4		263	9356.2	263	9356.2		263	907.96	263	907.96
116.3	65033	116.3	71536.3		263.6	9359.7	263.6	9359.7		263.6	896.13	263.6	896.13
116.4	65005	116.4	71505.5		264.3	9362	264.3	9362		264.3	900.62	264.3	900.62
116.6	65082	116.6	71590.2		264.9	9366.2	264.9	9366.2		264.9	893.89	264.9	893.89
116.8	64996	116.8	71495.6		265.5	9352.4	265.5	9352.4		265.5	887.05	265.5	887.05
116.9	64936	116.9	71429.6		266.2	9337.2	266.2	9337.2		266.2	909.48	266.2	909.48
117.1	64840	117.1	71324		266.8	9268.5	266.8	9268.5		266.8	915.68	266.8	915.68
117.2	64819	117.2	71300.9		267.4	9221.9	267.4	9221.9		267.4	902.06	267.4	902.06
117.4	64861	117.4	71347.1		268.1	9225.2	268.1	9225.2		268.1	918.5	268.1	918.5
117.6	64748	117.6	71222.8		268.7	9197.1	268.7	9197.1		268.7	913.31	268.7	913.31
117.7	64712	117.7	71183.2		269.4	9189.9	269.4	9189.9		269.4	908.76	269.4	908.76
117.9	64799	117.9	71278.9		270	9167.2	270	9167.2		270	905.82	270	905.82
118	64674	118	71141.4		270.6	9139.6	270.6	9139.6		270.6	893.3	270.6	893.3
118.2	64702	118.2	71172.2		271.3	9074.5	271.3	9074.5		271.3	900.1	271.3	900.1
118.4	64510	118.4	70961		271.9	9014.6	271.9	9014.6		271.9	899.75	271.9	899.75
118.5	64600	118.5	71060		272.6	8957.2	272.6	8957.2		272.6	888.29	272.6	888.29
118.7	64578	118.7	71035.8		273.2	8925.9	273.2	8925.9		273.2	878.28	273.2	878.28
118.8	64412	118.8	70853.2		273.9	8967.3	273.9	8967.3		273.9	872.77	273.9	872.77
119	64395	119	70834.5		274.5	8958.2	274.5	8958.2		274.5	879.1	274.5	879.1
119.2	64389	119.2	70827.9		275.2	8940.8	275.2	8940.8		275.2	860.91	275.2	860.91
119.3	64449	119.3	70893.9		275.8	8950.7	275.8	8950.7		275.8	851.78	275.8	851.78
119.5	64340	119.5	70774		276.5	8946.2	276.5	8946.2		276.5	843.57	276.5	843.57
119.6	64422	119.6	70864.2		277.1	8939.3	277.1	8939.3		277.1	818.45	277.1	818.45
119.8	64350	119.8	70785		277.8	8880.6	277.8	8880.6		277.8	818.35	277.8	818.35
120	64354	120	70789.4		278.5	8891.3	278.5	8891.3		278.5	832.15	278.5	832.15
120.1	64268	120.1	70694.8		279.1	8885.6	279.1	8885.6		279.1	850.92	279.1	850.92
120.3	64298	120.3	70727.8		279.8	8896.6	279.8	8896.6		279.8	864.37	279.8	864.37
120.4	64282	120.4	70710.2		280.4	8938.8	280.4	8938.8		280.4	858.05	280.4	858.05
120.6	64314	120.6	70745.4		281.1	8981.9	281.1	8981.9		281.1	843.93	281.1	843.93
120.8	64208	120.8	70628.8		281.8	8877.5	281.8	8877.5		281.8	842.91	281.8	842.91
120.9	64176	120.9	70593.6		282.4	8832.9	282.4	8832.9		282.4	842.48	282.4	842.48
121.1	64206	121.1	70626.6		283.1	8796.7	283.1	8796.7		283.1	844.49	283.1	844.49
121.2	64204	121.2	70624.4		283.8	8774.5	283.8	8774.5		283.8	849.71	283.8	849.71
121.4	64153	121.4	70568.3		284.5	8767.1	284.5	8767.1		284.5	843.3	284.5	843.3
121.6	64072	121.6	70479.2		285.1	8759.4	285.1	8759.4		285.1	830.02	285.1	830.02
121.7	64014	121.7	70415.4		285.8	8774.1	285.8	8774.1		285.8	823.37	285.8	823.37
121.9	64030	121.9	70433		286.5	8751.7	286.5	8751.7		286.5	795.02	286.5	795.02
122	63967	122	70363.7		287.2	8710.8	287.2	8710.8		287.2	772.27	287.2	772.27
122.2	63989	122.2	70387.9		287.8	8703.4	287.8	8703.4		287.8	782.25	287.8	782.25
122.4	63923	122.4	70315.3		288.5	8726.1	288.5	8726.1		288.5	825.74	288.5	825.74
122.5	63931	122.5	70324.1		289.2	8724.5	289.2	8724.5		289.2	841.33	289.2	841.33
122.7	63867	122.7	70253.7		289.9	8766.2	289.9	8766.2		289.9	832.97	289.9	832.97
122.8	63878	122.8	70265.8		290.6	8794.3	290.6	8794.3		290.6	830.47	290.6	830.47
123	63802	123	70182.2		291.2	8785.6	291.2	8785.6		291.2	833.05	291.2	833.05
123.2	63823	123.2	70205.3		291.9	8748.7	291.9	8748.7		291.9	824.26	291.9	824.26
123.3	63711	123.3	70082.1		292.6	8691.7	292.6	8691.7		292.6	806.43	292.6	806.43
123.5	63656	123.5	70021.6		293.3	8647.7	293.3	8647.7		293.3	801.78	293.3	801.78
123.7	63744	123.7	70118.4		294	8559.8	294	8559.8		294	780.51	294	780.51
123.8	63668	123.8	70034.8		294.7	8507.9	294.7	8507.9		294.7	774.13	294.7	774.13
124	63729	124	70101.9		295.4	8455.6	295.4	8455.6		295.4	779.17	295.4	779.17
124.1	63652	124.1	70017.2		296.1	8418.7	296.1	8418.7		296.1	788.16	296.1	788.16
124.3	63654	124.3	70019.4		296.8	8409.5	296.8	8409.5		296.8	797.56	296.8	797.56
124.5	63633	124.5	69996.3		297.5	8408	297.5	8408		297.5	799.63	297.5	799.63
124.6	63572	124.6	69929.2		298.2	8383.1	298.2	8383.1		298.2	800.23	298.2	800.23
124.8	63626	124.8	69988.6		298.9	8374.2	298.9	8374.2		298.9	791.49	298.9	791.49
125	63445	125	69789.5		299.6	8369	299.6	8369		299.6	793.86	299.6	793.86
125.1	63445	125.1	69789.5		300.3	8374.1	300.3	8374.1		300.3	791.38	300.3	791.38
125.3	63468	125.3	69814.8		301	8405.9	301	8405.9		301	786.43	301	786.43
125.4	63467	125.4	69813.7		301.7	8493	301.7	8493		301.7	794.36	301.7	794.36
125.6	63423	125.6	69765.3		302.4	8503.8	302.4	8503.8		302.4	788.89	302.4	788.89
125.8	63414	125.8	69755.4		303.1	8492.4	303.1	8492.4		303.1	772.55	303.1	772.55
125.9	63361	125.9	69697.1		303.8	8456.5	303.8	8456.5		303.8	768	303.8	768
126.1	63348	126.1	69682.8		304.5	8428.2	304.5	8428.2		304.5	756.83	304.5	756.83
126.3	63264	126.3	69590.4		305.2	8421.5	305.2	8421.5		305.2	755.69	305.2	755.69
126.4	63237	126.4	69560.7		305.9	8411.2	305.9	8411.2		305.9	747.1	305.9	747.1
126.6	63261	126.6	69587.1		306.7	8402.4	306.7	8402.4		306.7	748.26	306.7	748.26
126.8	63228	126.8	69550.8		307.4	8381	307.4	8381		307.4	727.57	307.4	727.57
126.9	63163	126.9	69479.3		308.1	8302	308.1	8302		308.1	727.76	308.1	727.76
127.1	63188	127.1	69506.8		308.8	8187.3	308.8	8187.3		308.8	730.69	308.8	730.69
127.2	63141	127.2	69455.1		309.5	8159.4	309.5	8159.4		309.5	728.44	309.5	728.44
127.4	63069	127.4	69375.9		310.3	8229.9	310.3	8229.9		310.3	735.31	310.3	735.31
127.6	63102	127.6	69412.2		311	8290.5	311	8290.5		311	743.11	311	743.11
127.7	63124	127.7	69436.4		311.7	8361.4	311.7	8361.4		311.7	745.36	311.7	745.36
127.9	63011	127.9	69312.1		312.4	8345.2	312.4	8345.2		312.4	745.8	312.4	745.8
128.1	62967	128.1	69263.7		313.2	8323.1	313.2	8323.1		313.2	749.19	313.2	749.19
128.2	62953	128.2	69248.3		313.9	8266.4	313.9	8266.4		313.9	746.08	313.9	746.08
128.4	62916	128.4	69207.6		314.6	8255.3	314.6	8255.3		314.6	741.46	314.6	741.46
128.6	62865	128.6	69151.5		315.4	8204.3	315.4	8204.3		315.4	741.46	315.4	741.46
128.7	62823	128.7	69105.3		316.1	8172.3	316.1	8172.3		316.1	733.74	316.1	733.74
128.9	62800	128.9	69080		316.8	8169.8	316.8	8169.8		316.8	733.65	316.8	733.65
129.1	62737	129.1	69010.7		317.6	8068.7	317.6	8068.7		317.6	730.96	317.6	730.96
129.2	62705	129.2	68975.5		318.3	7998	318.3	7998		318.3	731.18	318.3	731.18
129.4	62700	129.4	68970		319	7984.9	319	7984.9		319	725.34	319	725.34
129.5	62725	129.5	68997.5		319.8	7879.9	319.8	7879.9		319.8	721.13	319.8	721.13
129.7	62678	129.7	68945.8		320.5	7841.3	320.5	7841.3		320.5	727.7	320.5	727.7
129.9	62685	129.9	68953.5		321.3	7838.2	321.3	7838.2		321.3	732.13	321.3	732.13
130	62686	130	68954.6		322	7866	322	7866		322	718.09	322	718.09
130.2	62662	130.2	68928.2		322.8	7875.2	322.8	7875.2		322.8	707.87	322.8	707.87
130.4	62670	130.4	68937		323.5	7955.1	323.5	7955.1		323.5	705.87	323.5	705.87
130.5	62600	130.5	68860		324.3	8005.7	324.3	8005.7		324.3	697.44	324.3	697.44
130.7	62594	130.7	68853.4		325	8021.3	325	8021.3		325	691.44	325	691.44
130.9	62599	130.9	68858.9		325.8	8000.5	325.8	8000.5		325.8	689.37	325.8	689.37
131	62611	131	68872.1		326.5	7987.4	326.5	7987.4		326.5	685.77	326.5	685.77
131.2	62550	131.2	68805		327.3	7932.4	327.3	7932.4		327.3	694.94	327.3	694.94
131.4	62519	131.4	68770.9		328	7812.5	328	7812.5		328	684.07	328	684.07
131.5	62498	131.5	68747.8		328.8	7764.9	328.8	7764.9		328.8	677.3	328.8	677.3
131.7	62532	131.7	68785.2		329.6	7760.8	329.6	7760.8		329.6	683.6	329.6	683.6
131.9	62499	131.9	68748.9		330.3	7752.8	330.3	7752.8		330.3	680.18	330.3	680.18
132	62469	132	68715.9		331.1	7751.1	331.1	7751.1		331.1	681.98	331.1	681.98
132.2	62400	132.2	68640		331.9	7758.4	331.9	7758.4		331.9	687.84	331.9	687.84
132.4	62425	132.4	68667.5		332.6	7727.3	332.6	7727.3		332.6	689.64	332.6	689.64
132.5	62423	132.5	68665.3		333.4	7716.2	333.4	7716.2		333.4	682.29	333.4	682.29
132.7	62405	132.7	68645.5		334.2	7708.9	334.2	7708.9		334.2	678.2	334.2	678.2
132.9	62325	132.9	68557.5		334.9	7669	334.9	7669		334.9	686.68	334.9	686.68
133	62353	133	68588.3		335.7	7643.2	335.7	7643.2		335.7	696.31	335.7	696.31
133.2	62341	133.2	68575.1		336.5	7663.6	336.5	7663.6		336.5	667.57	336.5	667.57
133.4	62270	133.4	68497		337.3	7711	337.3	7711		337.3	662.17	337.3	662.17
133.5	62198	133.5	68417.8		338	7733.9	338	7733.9		338	659.6	338	659.6
133.7	62219	133.7	68440.9		338.8	7733.4	338.8	7733.4		338.8	667.71	338.8	667.71
133.9	62238	133.9	68461.8		339.6	7730.9	339.6	7730.9		339.6	660.28	339.6	660.28
134	62218	134	68439.8		340.4	7706.6	340.4	7706.6		340.4	657.67	340.4	657.67
134.2	62193	134.2	68412.3		341.2	7683.1	341.2	7683.1		341.2	664.41	341.2	664.41
134.4	62149	134.4	68363.9		342	7667.3	342	7667.3		342	656.97	342	656.97
134.5	62139	134.5	68352.9		342.8	7679.2	342.8	7679.2		342.8	675.2	342.8	675.2
134.7	62135	134.7	68348.5		343.5	7641.9	343.5	7641.9		343.5	670.27	343.5	670.27
134.9	62140	134.9	68354		344.3	7574	344.3	7574		344.3	650.82	344.3	650.82
135	62077	135	68284.7		345.1	7495	345.1	7495		345.1	641.25	345.1	641.25
135.2	62008	135.2	68208.8		345.9	7452.4	345.9	7452.4		345.9	621.81	345.9	621.81
135.4	61979	135.4	68176.9		346.7	7480.5	346.7	7480.5		346.7	624.89	346.7	624.89
135.5	61956	135.5	68151.6		347.5	7523.7	347.5	7523.7		347.5	620.18	347.5	620.18
135.7	61985	135.7	68183.5		348.3	7527	348.3	7527		348.3	645.33	348.3	645.33
135.9	61915	135.9	68106.5		349.1	7579.7	349.1	7579.7		349.1	670.37	349.1	670.37
136	61894	136	68083.4		349.9	7545.5	349.9	7545.5		349.9	663.21	349.9	663.21
136.2	61917	136.2	68108.7		350.7	7505.4	350.7	7505.4		350.7	686.19	350.7	686.19
136.4	61965	136.4	68161.5		351.5	7452.9	351.5	7452.9		351.5	682.01	351.5	682.01
136.6	61995	136.6	68194.5		352.3	7353.8	352.3	7353.8		352.3	674.61	352.3	674.61
136.7	62011	136.7	68212.1		353.1	7388.9	353.1	7388.9		353.1	656.56	353.1	656.56
136.9	61977	136.9	68174.7		354	7416.5	354	7416.5		354	637.39	354	637.39
137.1	61866	137.1	68052.6		354.8	7413.6	354.8	7413.6		354.8	612.27	354.8	612.27
137.2	61807	137.2	67987.7		355.6	7416	355.6	7416		355.6	581.47	355.6	581.47
137.4	61760	137.4	67936		356.4	7391.3	356.4	7391.3		356.4	587.96	356.4	587.96
137.6	61692	137.6	67861.2		357.2	7314.9	357.2	7314.9		357.2	600.97	357.2	600.97
137.7	61643	137.7	67807.3		358	7328.1	358	7328.1		358	602.07	358	602.07
137.9	61596	137.9	67755.6		358.9	7380.6	358.9	7380.6		358.9	593.41	358.9	593.41
138.1	61609	138.1	67769.9		359.7	7340	359.7	7340		359.7	588.02	359.7	588.02
138.2	61614	138.2	67775.4		360.5	7250.9	360.5	7250.9		360.5	574.61	360.5	574.61
138.4	61586	138.4	67744.6		361.3	7205.7	361.3	7205.7		361.3	591.32	361.3	591.32
138.6	61548	138.6	67702.8		362.1	7166.3	362.1	7166.3		362.1	604.95	362.1	604.95
138.8	61469	138.8	67615.9		363	7240.8	363	7240.8		363	607.8	363	607.8
138.9	61442	138.9	67586.2		363.8	7297.8	363.8	7297.8		363.8	612.43	363.8	612.43
139.1	61456	139.1	67601.6		364.6	7275.9	364.6	7275.9		364.6	603.93	364.6	603.93
139.3	61394	139.3	67533.4		365.5	7229.1	365.5	7229.1		365.5	603.86	365.5	603.86
139.4	61394	139.4	67533.4		366.3	7211.2	366.3	7211.2		366.3	577.99	366.3	577.99
139.6	61355	139.6	67490.5		367.1	7212.9	367.1	7212.9		367.1	561.17	367.1	561.17
139.8	61327	139.8	67459.7		368	7176.7	368	7176.7		368	568.81	368	568.81
139.9	61323	139.9	67455.3		368.8	7163.3	368.8	7163.3		368.8	566.69	368.8	566.69
140.1	61328	140.1	67460.8		369.7	7155.7	369.7	7155.7		369.7	547.21	369.7	547.21
140.3	61257	140.3	67382.7		370.5	7159.2	370.5	7159.2		370.5	556.78	370.5	556.78
140.5	61240	140.5	67364		371.4	7156.2	371.4	7156.2		371.4	565.62	371.4	565.62
140.6	61235	140.6	67358.5		372.2	7144.5	372.2	7144.5		372.2	565.05	372.2	565.05
140.8	61218	140.8	67339.8		373.1	7104.9	373.1	7104.9		373.1	556.02	373.1	556.02
141	61099	141	67208.9		373.9	7052.2	373.9	7052.2		373.9	559.89	373.9	559.89
141.1	61050	141.1	67155		374.8	6977.8	374.8	6977.8		374.8	554.81	374.8	554.81
141.3	61040	141.3	67144		375.6	6986.2	375.6	6986.2		375.6	563.67	375.6	563.67
141.5	61054	141.5	67159.4		376.5	6975.6	376.5	6975.6		376.5	568.49	376.5	568.49
141.6	61068	141.6	67174.8		377.3	6991.4	377.3	6991.4		377.3	570.36	377.3	570.36
141.8	61036	141.8	67139.6		378.2	6993.6	378.2	6993.6		378.2	567.41	378.2	567.41
142	61010	142	67111		379	6992.8	379	6992.8		379	565.46	379	565.46
142.2	60977	142.2	67074.7		379.9	6969.7	379.9	6969.7		379.9	563.91	379.9	563.91
142.3	60943	142.3	67037.3		380.8	6918.9	380.8	6918.9		380.8	567.66	380.8	567.66
142.5	60894	142.5	66983.4		381.6	6898.6	381.6	6898.6		381.6	567.63	381.6	567.63
142.7	60934	142.7	67027.4		382.5	6897.6	382.5	6897.6		382.5	562.07	382.5	562.07
142.8	60911	142.8	67002.1		383.4	6900.2	383.4	6900.2		383.4	580.09	383.4	580.09
143	60859	143	66944.9		384.2	6900.2	384.2	6900.2		384.2	579.91	384.2	579.91
143.2	60855	143.2	66940.5		385.1	6838.3	385.1	6838.3		385.1	574.19	385.1	574.19
143.4	60817	143.4	66898.7		386	6760.3	386	6760.3		386	580.09	386	580.09
143.5	60753	143.5	66828.3		386.9	6727.4	386.9	6727.4		386.9	562.67	386.9	562.67
143.7	60745	143.7	66819.5		387.8	6715.8	387.8	6715.8		387.8	572.19	387.8	572.19
143.9	60726	143.9	66798.6		388.6	6693.7	388.6	6693.7		388.6	565.24	388.6	565.24
144.1	60698	144.1	66767.8		389.5	6678.7	389.5	6678.7		389.5	548.99	389.5	548.99
144.2	60713	144.2	66784.3		390.4	6761.9	390.4	6761.9		390.4	555.39	390.4	555.39
144.4	60736	144.4	66809.6		391.3	6791.9	391.3	6791.9		391.3	560.35	391.3	560.35
144.6	60671	144.6	66738.1		392.2	6803.7	392.2	6803.7		392.2	556.78	392.2	556.78
144.7	60561	144.7	66617.1		393.1	6807.1	393.1	6807.1		393.1	535.05	393.1	535.05
144.9	60581	144.9	66639.1		393.9	6848.7	393.9	6848.7		393.9	555.49	393.9	555.49
145.1	60567	145.1	66623.7		394.8	6818.4	394.8	6818.4		394.8	565.36	394.8	565.36
145.3	60604	145.3	66664.4		395.7	6813.3	395.7	6813.3		395.7	554.01	395.7	554.01
145.4	60602	145.4	66662.2		396.6	6801	396.6	6801		396.6	554.58	396.6	554.58
145.6	60493	145.6	66542.3		397.5	6774.4	397.5	6774.4		397.5	556.29	397.5	556.29
145.8	60537	145.8	66590.7		398.4	6748.8	398.4	6748.8		398.4	541.43	398.4	541.43
146	60485	146	66533.5		399.3	6699.4	399.3	6699.4		399.3	531.72	399.3	531.72
146.1	60499	146.1	66548.9		400.2	6649.9	400.2	6649.9		400.2	522.05	400.2	522.05
146.3	60395	146.3	66434.5		401.1	6674.8	401.1	6674.8		401.1	540.79	401.1	540.79
146.5	60445	146.5	66489.5		402	6670.3	402	6670.3		402	539.77	402	539.77
146.6	60414	146.6	66455.4		403	6672.4	403	6672.4		403	541.24	403	541.24
146.8	60358	146.8	66393.8		403.9	6645.4	403.9	6645.4		403.9	531.59	403.9	531.59
147	60340	147	66374		404.8	6604.5	404.8	6604.5		404.8	529.3	404.8	529.3
147.2	60299	147.2	66328.9		405.7	6592	405.7	6592		405.7	512.46	405.7	512.46
147.3	60317	147.3	66348.7		406.6	6592.1	406.6	6592.1		406.6	508.63	406.6	508.63
147.5	60353	147.5	66388.3		407.5	6579.4	407.5	6579.4		407.5	523.76	407.5	523.76
147.7	60368	147.7	66404.8		408.4	6532.5	408.4	6532.5		408.4	548.48	408.4	548.48
147.9	60379	147.9	66416.9		409.4	6553.9	409.4	6553.9		409.4	554.28	409.4	554.28
148	60303	148	66333.3		410.3	6535.5	410.3	6535.5		410.3	541.72	410.3	541.72
148.2	60248	148.2	66272.8		411.2	6529.8	411.2	6529.8		411.2	527.1	411.2	527.1
148.4	60223	148.4	66245.3		412.1	6516.3	412.1	6516.3		412.1	524.98	412.1	524.98
148.6	60186	148.6	66204.6		413.1	6500.6	413.1	6500.6		413.1	534.04	413.1	534.04
148.7	60215	148.7	66236.5		414	6465.2	414	6465.2		414	525.67	414	525.67
148.9	60296	148.9	66325.6		414.9	6473.3	414.9	6473.3		414.9	522.11	414.9	522.11
149.1	60275	149.1	66302.5		415.9	6460.6	415.9	6460.6		415.9	518.45	415.9	518.45
149.3	60243	149.3	66267.3		416.8	6439.2	416.8	6439.2		416.8	510.07	416.8	510.07
149.4	60205	149.4	66225.5		417.8	6403.9	417.8	6403.9		417.8	518.42	417.8	518.42
149.6	60134	149.6	66147.4		418.7	6370	418.7	6370		418.7	526.92	418.7	526.92
149.8	60120	149.8	66132		419.6	6384.4	419.6	6384.4		419.6	514.14	419.6	514.14
150	60112	150	66123.2		420.6	6379.2	420.6	6379.2		420.6	510.32	420.6	510.32
150.1	60041	150.1	66045.1		421.5	6377.4	421.5	6377.4		421.5	485.18	421.5	485.18
150.3	60070	150.3	66077		422.5	6345	422.5	6345		422.5	483.74	422.5	483.74
150.5	60141	150.5	66155.1		423.4	6320.9	423.4	6320.9		423.4	481.74	423.4	481.74
150.7	60135	150.7	66148.5		424.4	6342.1	424.4	6342.1		424.4	477.1	424.4	477.1
150.8	60171	150.8	66188.1		425.3	6393.8	425.3	6393.8		425.3	464.32	425.3	464.32
151	60097	151	66106.7		426.3	6365.6	426.3	6365.6		426.3	449.76	426.3	449.76
151.2	60006	151.2	66006.6		427.2	6318.9	427.2	6318.9		427.2	447.17	427.2	447.17
151.4	59966	151.4	65962.6		428.2	6294.8	428.2	6294.8		428.2	444.14	428.2	444.14
151.5	59804	151.5	65784.4		429.2	6286.3	429.2	6286.3		429.2	470.95	429.2	470.95
151.7	59914	151.7	65905.4		430.1	6244	430.1	6244		430.1	480.58	430.1	480.58
151.9	59766	151.9	65742.6		431.1	6244	431.1	6244		431.1	461.38	431.1	461.38
152.1	59795	152.1	65774.5		432.1	6235.3	432.1	6235.3		432.1	455.88	432.1	455.88
152.2	59743	152.2	65717.3		433	6240.1	433	6240.1		433	447.13	433	447.13
152.4	59697	152.4	65666.7		434	6195	434	6195		434	439.32	434	439.32
152.6	59687	152.6	65655.7		435	6139.1	435	6139.1		435	446.47	435	446.47
152.8	59595	152.8	65554.5		436	6108.6	436	6108.6		436	427.88	436	427.88
153	59646	153	65610.6		436.9	6104.5	436.9	6104.5		436.9	445.15	436.9	445.15
153.1	59513	153.1	65464.3		437.9	6145.7	437.9	6145.7		437.9	458.77	437.9	458.77
153.3	59593	153.3	65552.3		438.9	6167	438.9	6167		438.9	488.26	438.9	488.26
153.5	59534	153.5	65487.4		439.9	6179.1	439.9	6179.1		439.9	482.05	439.9	482.05
153.7	59580	153.7	65538		440.9	6143.7	440.9	6143.7		440.9	477.87	440.9	477.87
153.8	59518	153.8	65469.8		441.8	6138.7	441.8	6138.7		441.8	473.35	441.8	473.35
154	59522	154	65474.2		442.8	6091.7	442.8	6091.7		442.8	472.9	442.8	472.9
154.2	59526	154.2	65478.6		443.8	6011.2	443.8	6011.2		443.8	463.06	443.8	463.06
154.4	59506	154.4	65456.6		444.8	6006.2	444.8	6006.2		444.8	459.56	444.8	459.56
154.5	59485	154.5	65433.5		445.8	6052.5	445.8	6052.5		445.8	454.05	445.8	454.05
154.7	59422	154.7	65364.2		446.8	6111.6	446.8	6111.6		446.8	452.16	446.8	452.16
154.9	59386	154.9	65324.6		447.8	6069.2	447.8	6069.2		447.8	439.16	447.8	439.16
155.1	59451	155.1	65396.1		448.8	6059.4	448.8	6059.4		448.8	456.9	448.8	456.9
155.3	59404	155.3	65344.4		449.8	6025.9	449.8	6025.9		449.8	449.75	449.8	449.75
155.4	59400	155.4	65340		450.8	5987.5	450.8	5987.5		450.8	489.27	450.8	489.27
155.6	59341	155.6	65275.1		451.8	5959.2	451.8	5959.2		451.8	502.96	451.8	502.96
155.8	59355	155.8	65290.5		452.8	5947.3	452.8	5947.3		452.8	498.69	452.8	498.69
156	59295	156	65224.5		453.8	5956.6	453.8	5956.6		453.8	479.96	453.8	479.96
156.2	59322	156.2	65254.2		454.9	5919	454.9	5919		454.9	466.81	454.9	466.81
156.3	59218	156.3	65139.8		455.9	5945.8	455.9	5945.8		455.9	450.41	455.9	450.41
156.5	59293	156.5	65222.3		456.9	5981.2	456.9	5981.2		456.9	458.3	456.9	458.3
156.7	59218	156.7	65139.8		457.9	5984.8	457.9	5984.8		457.9	457.59	457.9	457.59
156.9	59222	156.9	65144.2		458.9	5961.4	458.9	5961.4		458.9	449.52	458.9	449.52
157	59229	157	65151.9		460	5957.2	460	5957.2		460	433.18	460	433.18
157.2	59142	157.2	65056.2		461	5952.4	461	5952.4		461	427.33	461	427.33
157.4	59202	157.4	65122.2		462	5920.9	462	5920.9		462	411.41	462	411.41
157.6	59119	157.6	65030.9		463	5908.3	463	5908.3		463	428.27	463	428.27
157.8	59208	157.8	65128.8		464.1	5894	464.1	5894		464.1	445.64	464.1	445.64
157.9	59144	157.9	65058.4		465.1	5872	465.1	5872		465.1	450.63	465.1	450.63
158.1	59150	158.1	65065		466.1	5819	466.1	5819		466.1	436.41	466.1	436.41
158.3	59090	158.3	64999		467.2	5767.9	467.2	5767.9		467.2	437.39	467.2	437.39
158.5	59010	158.5	64911		468.2	5667.2	468.2	5667.2		468.2	415.46	468.2	415.46
158.7	59073	158.7	64980.3		469.3	5683.5	469.3	5683.5		469.3	412.99	469.3	412.99
158.8	58972	158.8	64869.2		470.3	5659.3	470.3	5659.3		470.3	415.2	470.3	415.2
159	58899	159	64788.9		471.3	5574.6	471.3	5574.6		471.3	419.94	471.3	419.94
159.2	58951	159.2	64846.1		472.4	5631.6	472.4	5631.6		472.4	419.59	472.4	419.59
159.4	58922	159.4	64814.2		473.4	5711.9	473.4	5711.9		473.4	425.65	473.4	425.65
159.6	58921	159.6	64813.1		474.5	5738.5	474.5	5738.5		474.5	431.96	474.5	431.96
159.7	58961	159.7	64857.1		475.6	5745.2	475.6	5745.2		475.6	443.04	475.6	443.04
159.9	58833	159.9	64716.3		476.6	5812.2	476.6	5812.2		476.6	415.84	476.6	415.84
160.1	58841	160.1	64725.1		477.7	5799.6	477.7	5799.6		477.7	419.76	477.7	419.76
160.3	58879	160.3	64766.9		478.7	5747.9	478.7	5747.9		478.7	430.14	478.7	430.14
160.5	58742	160.5	64616.2		479.8	5701.7	479.8	5701.7		479.8	409.56	479.8	409.56
160.6	58696	160.6	64565.6		480.9	5710	480.9	5710		480.9	389.04	480.9	389.04
160.8	58747	160.8	64621.7		481.9	5676.3	481.9	5676.3		481.9	394.53	481.9	394.53
161	58658	161	64523.8		483	5607.8	483	5607.8		483	391.34	483	391.34
161.2	58580	161.2	64438		484.1	5516.6	484.1	5516.6		484.1	393.15	484.1	393.15
161.4	58570	161.4	64427		485.1	5514.3	485.1	5514.3		485.1	390.94	485.1	390.94
161.5	58539	161.5	64392.9		486.2	5576.1	486.2	5576.1		486.2	407.51	486.2	407.51
161.7	58490	161.7	64339		487.3	5621.8	487.3	5621.8		487.3	416.45	487.3	416.45
161.9	58461	161.9	64307.1		488.4	5606.2	488.4	5606.2		488.4	417.4	488.4	417.4
162.1	58461	162.1	64307.1		489.5	5509.9	489.5	5509.9		489.5	404.9	489.5	404.9
162.3	58464	162.3	64310.4		490.5	5513.2	490.5	5513.2		490.5	393.36	490.5	393.36
162.5	58435	162.5	64278.5		491.6	5561.1	491.6	5561.1		491.6	378.01	491.6	378.01
162.6	58404	162.6	64244.4		492.7	5480.8	492.7	5480.8		492.7	395.95	492.7	395.95
162.8	58340	162.8	64174		493.8	5422.5	493.8	5422.5		493.8	379.51	493.8	379.51
163	58263	163	64089.3		494.9	5415	494.9	5415		494.9	380.21	494.9	380.21
163.2	58285	163.2	64113.5		496	5397.7	496	5397.7		496	376.15	496	376.15
163.4	58276	163.4	64103.6		497.1	5451.1	497.1	5451.1		497.1	386.25	497.1	386.25
163.5	58268	163.5	64094.8		498.2	5430.8	498.2	5430.8		498.2	388.81	498.2	388.81
163.7	58133	163.7	63946.3		499.3	5396.2	499.3	5396.2		499.3	394.71	499.3	394.71
163.9	58004	163.9	63804.4		500.4	5455.3	500.4	5455.3		500.4	390.3	500.4	390.3
164.1	58040	164.1	63844		501.5	5511.7	501.5	5511.7		501.5	388.74	501.5	388.74
164.3	58085	164.3	63893.5		502.6	5541.9	502.6	5541.9		502.6	401.81	502.6	401.81
164.5	57965	164.5	63761.5		503.7	5437.7	503.7	5437.7		503.7	384.87	503.7	384.87
164.6	57904	164.6	63694.4		504.9	5374.6	504.9	5374.6		504.9	386.5	504.9	386.5
164.8	57901	164.8	63691.1		506	5361.8	506	5361.8		506	394.89	506	394.89
165	57873	165	63660.3		507.1	5365.3	507.1	5365.3		507.1	399.4	507.1	399.4
165.2	57822	165.2	63604.2		508.2	5326.8	508.2	5326.8		508.2	408.94	508.2	408.94
165.4	57859	165.4	63644.9		509.3	5349.9	509.3	5349.9		509.3	406.06	509.3	406.06
165.6	57813	165.6	63594.3		510.5	5352.1	510.5	5352.1		510.5	395.57	510.5	395.57
165.7	57743	165.7	63517.3		511.6	5385.9	511.6	5385.9		511.6	386.13	511.6	386.13
165.9	57815	165.9	63596.5		512.7	5454.4	512.7	5454.4		512.7	373.59	512.7	373.59
166.1	57917	166.1	63708.7		513.8	5474	513.8	5474		513.8	387.15	513.8	387.15
166.3	57904	166.3	63694.4		515	5493.6	515	5493.6		515	406.1	515	406.1
166.5	57839	166.5	63622.9		516.1	5421.7	516.1	5421.7		516.1	407.37	516.1	407.37
166.7	57848	166.7	63632.8		517.3	5418.6	517.3	5418.6		517.3	381.43	517.3	381.43
166.8	57842	166.8	63626.2		518.4	5395	518.4	5395		518.4	369.65	518.4	369.65
167	57766	167	63542.6		519.5	5271.1	519.5	5271.1		519.5	371.55	519.5	371.55
167.2	57855	167.2	63640.5		520.7	5258.1	520.7	5258.1		520.7	370.2	520.7	370.2
167.4	57819	167.4	63600.9		521.8	5236.1	521.8	5236.1		521.8	372.58	521.8	372.58
167.6	57796	167.6	63575.6		523	5273.1	523	5273.1		523	359.11	523	359.11
167.8	57802	167.8	63582.2		524.1	5307.2	524.1	5307.2		524.1	348.7	524.1	348.7
167.9	57670	167.9	63437		525.3	5306.2	525.3	5306.2		525.3	354.65	525.3	354.65
168.1	57541	168.1	63295.1		526.4	5284.5	526.4	5284.5		526.4	345.96	526.4	345.96
168.3	57541	168.3	63295.1		527.6	5255.7	527.6	5255.7		527.6	337.12	527.6	337.12
168.5	57425	168.5	63167.5		528.8	5229.6	528.8	5229.6		528.8	339.24	528.8	339.24
168.7	57387	168.7	63125.7		529.9	5214.5	529.9	5214.5		529.9	367.78	529.9	367.78
168.9	57430	168.9	63173		531.1	5216	531.1	5216		531.1	398.13	531.1	398.13
169	57359	169	63094.9		532.3	5210.8	532.3	5210.8		532.3	405.21	532.3	405.21
169.2	57362	169.2	63098.2		533.4	5193.4	533.4	5193.4		533.4	392.44	533.4	392.44
169.4	57396	169.4	63135.6		534.6	5183.1	534.6	5183.1		534.6	374	534.6	374
169.6	57392	169.6	63131.2		535.8	5186	535.8	5186		535.8	372.18	535.8	372.18
169.8	57404	169.8	63144.4		537	5159.2	537	5159.2		537	362.15	537	362.15
170	57409	170	63149.9		538.1	5162	538.1	5162		538.1	343.15	538.1	343.15
170.2	57400	170.2	63140		539.3	5142.7	539.3	5142.7		539.3	345.61	539.3	345.61
170.3	57522	170.3	63274.2		540.5	5100.6	540.5	5100.6		540.5	343.43	540.5	343.43
170.5	57633	170.5	63396.3		541.7	5038	541.7	5038		541.7	342.63	541.7	342.63
170.7	57602	170.7	63362.2		542.9	5093.9	542.9	5093.9		542.9	326.18	542.9	326.18
170.9	57638	170.9	63401.8		544.1	5114	544.1	5114		544.1	312.87	544.1	312.87
171.1	57704	171.1	63474.4		545.3	5109.7	545.3	5109.7		545.3	349.94	545.3	349.94
171.3	57676	171.3	63443.6		546.5	5127.5	546.5	5127.5		546.5	362.23	546.5	362.23
171.5	57743	171.5	63517.3		547.7	5097.2	547.7	5097.2		547.7	372.59	547.7	372.59
171.6	57670	171.6	63437		548.9	5082.2	548.9	5082.2		548.9	368.4	548.9	368.4
171.8	57677	171.8	63444.7		550.1	5021.4	550.1	5021.4		550.1	333.75	550.1	333.75
172	57552	172	63307.2		551.3	4975	551.3	4975		551.3	340.36	551.3	340.36
172.2	57483	172.2	63231.3		552.5	4969.2	552.5	4969.2		552.5	338.97	552.5	338.97
172.4	57593	172.4	63352.3		553.7	5017.6	553.7	5017.6		553.7	333.2	553.7	333.2
172.6	57447	172.6	63191.7		554.9	5032.3	554.9	5032.3		554.9	332.36	554.9	332.36
172.8	57474	172.8	63221.4		556.1	5011.2	556.1	5011.2		556.1	335.21	556.1	335.21
173	57403	173	63143.3		557.4	4968	557.4	4968		557.4	357.78	557.4	357.78
173.1	57350	173.1	63085		558.6	4986.2	558.6	4986.2		558.6	353.01	558.6	353.01
173.3	57342	173.3	63076.2		559.8	4997.8	559.8	4997.8		559.8	321.25	559.8	321.25
173.5	57328	173.5	63060.8		561	4975.3	561	4975.3		561	320.99	561	320.99
173.7	57294	173.7	63023.4		562.3	4886.8	562.3	4886.8		562.3	335.04	562.3	335.04
173.9	57250	173.9	62975		563.5	4707.2	563.5	4707.2		563.5	319.78	563.5	319.78
174.1	57205	174.1	62925.5		564.7	4813.3	564.7	4813.3		564.7	314.09	564.7	314.09
174.3	57222	174.3	62944.2		566	4917	566	4917		566	346.1	566	346.1
174.4	57164	174.4	62880.4		567.2	4924	567.2	4924		567.2	377.72	567.2	377.72
174.6	57205	174.6	62925.5		568.4	4898.5	568.4	4898.5		568.4	371.87	568.4	371.87
174.8	57154	174.8	62869.4		569.7	4888.6	569.7	4888.6		569.7	352.57	569.7	352.57
175	57100	175	62810		570.9	4749.4	570.9	4749.4		570.9	334.01	570.9	334.01
175.2	57106	175.2	62816.6		572.2	4684.5	572.2	4684.5		572.2	318.62	572.2	318.62
175.4	56971	175.4	62668.1		573.4	4644.6	573.4	4644.6		573.4	330.64	573.4	330.64
175.6	56995	175.6	62694.5		574.7	4668.9	574.7	4668.9		574.7	330.07	574.7	330.07
175.8	56937	175.8	62630.7		575.9	4781.4	575.9	4781.4		575.9	330.2	575.9	330.2
176	56880	176	62568		577.2	4770.3	577.2	4770.3		577.2	355.97	577.2	355.97
176.1	56864	176.1	62550.4		578.5	4730.7	578.5	4730.7		578.5	351.28	578.5	351.28
176.3	56821	176.3	62503.1		579.7	4800.8	579.7	4800.8		579.7	319.26	579.7	319.26
176.5	56891	176.5	62580.1		581	4783.8	581	4783.8		581	308.63	581	308.63
176.7	56810	176.7	62491		582.3	4696.4	582.3	4696.4		582.3	333.27	582.3	333.27
176.9	56855	176.9	62540.5		583.5	4661.1	583.5	4661.1		583.5	321.93	583.5	321.93
177.1	56756	177.1	62431.6		584.8	4732.1	584.8	4732.1		584.8	317.24	584.8	317.24
177.3	56795	177.3	62474.5		586.1	4772.7	586.1	4772.7		586.1	329.95	586.1	329.95
177.5	56785	177.5	62463.5		587.4	4798.5	587.4	4798.5		587.4	339.42	587.4	339.42
177.7	56780	177.7	62458		588.6	4799.8	588.6	4799.8		588.6	326.84	588.6	326.84
177.8	56725	177.8	62397.5		589.9	4783.9	589.9	4783.9		589.9	328.65	589.9	328.65
178	56658	178	62323.8		591.2	4798.8	591.2	4798.8		591.2	324.49	591.2	324.49
178.2	56685	178.2	62353.5		592.5	4772.2	592.5	4772.2		592.5	318.64	592.5	318.64
178.4	56677	178.4	62344.7		593.8	4723	593.8	4723		593.8	312.01	593.8	312.01
178.6	56852	178.6	62537.2		595.1	4699.8	595.1	4699.8		595.1	309.6	595.1	309.6
178.8	56812	178.8	62493.2		596.4	4657.9	596.4	4657.9		596.4	310.96	596.4	310.96
179	56840	179	62524		597.7	4654.4	597.7	4654.4		597.7	301.06	597.7	301.06
179.2	56764	179.2	62440.4		599	4706	599	4706		599	303.29	599	303.29
179.4	56870	179.4	62557		600.3	4635.3	600.3	4635.3		600.3	316.48	600.3	316.48
179.5	56864	179.5	62550.4		601.6	4602.8	601.6	4602.8		601.6	302.82	601.6	302.82
179.7	56804	179.7	62484.4		602.9	4605.2	602.9	4605.2		602.9	313.81	602.9	313.81
179.9	56806	179.9	62486.6		604.2	4586.8	604.2	4586.8		604.2	314.43	604.2	314.43
180.1	56923	180.1	62615.3		605.5	4582.1	605.5	4582.1		605.5	299.14	605.5	299.14
180.3	56863	180.3	62549.3		606.9	4592.7	606.9	4592.7		606.9	291.51	606.9	291.51
180.5	56701	180.5	62371.1		608.2	4569.5	608.2	4569.5		608.2	288.03	608.2	288.03
180.7	56633	180.7	62296.3		609.5	4583.7	609.5	4583.7		609.5	282.07	609.5	282.07
180.9	56673	180.9	62340.3		610.8	4608.3	610.8	4608.3		610.8	279.57	610.8	279.57
181.1	56655	181.1	62320.5		612.2	4576	612.2	4576		612.2	282.44	612.2	282.44
181.3	56581	181.3	62239.1		613.5	4565.5	613.5	4565.5		613.5	285.78	613.5	285.78
181.5	56546	181.5	62200.6		614.8	4501.8	614.8	4501.8		614.8	271.36	614.8	271.36
181.6	56521	181.6	62173.1		616.2	4471.9	616.2	4471.9		616.2	268.13	616.2	268.13
181.8	56497	181.8	62146.7		617.5	4485	617.5	4485		617.5	270.42	617.5	270.42
182	56471	182	62118.1		618.8	4512.5	618.8	4512.5		618.8	274.44	618.8	274.44
182.2	56467	182.2	62113.7		620.2	4516.6	620.2	4516.6		620.2	294.21	620.2	294.21
182.4	56382	182.4	62020.2		621.5	4549.5	621.5	4549.5		621.5	289.54	621.5	289.54
182.6	56392	182.6	62031.2		622.9	4434.7	622.9	4434.7		622.9	282.98	622.9	282.98
182.8	56409	182.8	62049.9		624.2	4315.1	624.2	4315.1		624.2	305.7	624.2	305.7
183	56364	183	62000.4		625.6	4292.5	625.6	4292.5		625.6	281.77	625.6	281.77
183.2	56310	183.2	61941		627	4372.8	627	4372.8		627	262.86	627	262.86
183.4	56317	183.4	61948.7		628.3	4372.1	628.3	4372.1		628.3	272.16	628.3	272.16
183.6	56264	183.6	61890.4		629.7	4384.7	629.7	4384.7		629.7	255.44	629.7	255.44
183.8	56286	183.8	61914.6		631.1	4297.3	631.1	4297.3		631.1	275.03	631.1	275.03
183.9	56314	183.9	61945.4		632.4	4323.3	632.4	4323.3		632.4	281.52	632.4	281.52
184.1	56203	184.1	61823.3		633.8	4293.6	633.8	4293.6		633.8	283.69	633.8	283.69
184.3	56342	184.3	61976.2		635.2	4373.9	635.2	4373.9		635.2	287.5	635.2	287.5
184.5	56204	184.5	61824.4		636.5	4347.6	636.5	4347.6		636.5	275.48	636.5	275.48
184.7	56240	184.7	61864		637.9	4286.1	637.9	4286.1		637.9	257.33	637.9	257.33
184.9	56151	184.9	61766.1		639.3	4260.1	639.3	4260.1		639.3	281.17	639.3	281.17
185.1	56167	185.1	61783.7		640.7	4339.8	640.7	4339.8		640.7	310.16	640.7	310.16
185.3	56189	185.3	61807.9		642.1	4344.5	642.1	4344.5		642.1	319.07	642.1	319.07
185.5	56157	185.5	61772.7		643.5	4376.2	643.5	4376.2		643.5	309.97	643.5	309.97
185.7	56149	185.7	61763.9		644.9	4436.5	644.9	4436.5		644.9	314.79	644.9	314.79
185.9	56156	185.9	61771.6		646.3	4391.7	646.3	4391.7		646.3	299.69	646.3	299.69
186.1	56131	186.1	61744.1		647.7	4287.2	647.7	4287.2		647.7	277.82	647.7	277.82
186.3	56153	186.3	61768.3		649.1	4337.3	649.1	4337.3		649.1	269.37	649.1	269.37
186.5	56101	186.5	61711.1		650.5	4380.9	650.5	4380.9		650.5	273.8	650.5	273.8
186.7	56071	186.7	61678.1		651.9	4374	651.9	4374		651.9	266.47	651.9	266.47
186.8	56045	186.8	61649.5		653.3	4360.1	653.3	4360.1		653.3	259.32	653.3	259.32
187	56042	187	61646.2		654.7	4359.5	654.7	4359.5		654.7	262.6	654.7	262.6
187.2	56018	187.2	61619.8		656.1	4318.1	656.1	4318.1		656.1	255.37	656.1	255.37
187.4	55971	187.4	61568.1		657.6	4320.3	657.6	4320.3		657.6	246.55	657.6	246.55
187.6	55920	187.6	61512		659	4265.3	659	4265.3		659	237.22	659	237.22
187.8	55949	187.8	61543.9		660.4	4206.4	660.4	4206.4		660.4	224.98	660.4	224.98
188	55899	188	61488.9		661.8	4348.7	661.8	4348.7		661.8	221.68	661.8	221.68
188.2	55874	188.2	61461.4		663.3	4307.4	663.3	4307.4		663.3	238.82	663.3	238.82
188.4	55712	188.4	61283.2		664.7	4177.7	664.7	4177.7		664.7	264.99	664.7	264.99
188.6	55830	188.6	61413		666.1	4168.2	666.1	4168.2		666.1	252.01	666.1	252.01
188.8	55740	188.8	61314		667.6	4149.3	667.6	4149.3		667.6	246.02	667.6	246.02
189	55727	189	61299.7		669	4134.2	669	4134.2		669	254.91	669	254.91
189.2	55690	189.2	61259		670.5	4230	670.5	4230		670.5	241.56	670.5	241.56
189.4	55626	189.4	61188.6		671.9	4255.8	671.9	4255.8		671.9	259.68	671.9	259.68
189.6	55656	189.6	61221.6		673.4	4294.7	673.4	4294.7		673.4	253.73	673.4	253.73
189.8	55590	189.8	61149		674.8	4261	674.8	4261		674.8	274.53	674.8	274.53
190	55542	190	61096.2		676.3	4240	676.3	4240		676.3	261.37	676.3	261.37
190.2	55655	190.2	61220.5		677.7	4201.7	677.7	4201.7		677.7	224.95	677.7	224.95
190.3	55545	190.3	61099.5		679.2	4137.3	679.2	4137.3		679.2	244.59	679.2	244.59
190.5	55542	190.5	61096.2		680.7	4126.1	680.7	4126.1		680.7	233.38	680.7	233.38
190.7	55486	190.7	61034.6		682.1	4155.5	682.1	4155.5		682.1	240.93	682.1	240.93
190.9	55470	190.9	61017		683.6	4139.4	683.6	4139.4		683.6	235.01	683.6	235.01
191.1	55530	191.1	61083		685.1	4123	685.1	4123		685.1	238.87	685.1	238.87
191.3	55442	191.3	60986.2		686.6	4004.9	686.6	4004.9		686.6	237.52	686.6	237.52
191.5	55505	191.5	61055.5		688	4038.3	688	4038.3		688	254.12	688	254.12
191.7	55444	191.7	60988.4		689.5	4114.6	689.5	4114.6		689.5	232.42	689.5	232.42
191.9	55419	191.9	60960.9		691	4141.9	691	4141.9		691	246.04	691	246.04
192.1	55464	192.1	61010.4		692.5	4055.7	692.5	4055.7		692.5	219.72	692.5	219.72
192.3	55327	192.3	60859.7		694	4027.3	694	4027.3		694	235.34	694	235.34
192.5	55403	192.5	60943.3		695.5	3993.2	695.5	3993.2		695.5	241.45	695.5	241.45
192.7	55310	192.7	60841		697	4006.7	697	4006.7		697	248.97	697	248.97
192.9	55216	192.9	60737.6		698.5	3959.8	698.5	3959.8		698.5	243.95	698.5	243.95
193.1	55328	193.1	60860.8		700	3918	700	3918		700	235.17	700	235.17
193.3	55281	193.3	60809.1		701.5	3923.2	701.5	3923.2		701.5	240.21	701.5	240.21
193.5	55223	193.5	60745.3		703	3926	703	3926		703	237.54	703	237.54
193.7	55278	193.7	60805.8		704.5	3893.2	704.5	3893.2		704.5	225.12	704.5	225.12
193.9	55234	193.9	60757.4		706.1	3894.5	706.1	3894.5		706.1	226.83	706.1	226.83
194.1	55206	194.1	60726.6		707.6	3824.1	707.6	3824.1		707.6	218.81	707.6	218.81
194.3	55241	194.3	60765.1		709.1	3870.8	709.1	3870.8		709.1	236.38	709.1	236.38
194.5	55214	194.5	60735.4		710.6	3927	710.6	3927		710.6	264.29	710.6	264.29
194.7	55205	194.7	60725.5		712.2	3848.1	712.2	3848.1		712.2	248.18	712.2	248.18
194.9	55303	194.9	60833.3		713.7	3876.2	713.7	3876.2		713.7	254.54	713.7	254.54
195.1	55385	195.1	60923.5		715.2	3906.6	715.2	3906.6		715.2	249.93	715.2	249.93
195.3	55312	195.3	60843.2		716.8	3793.8	716.8	3793.8		716.8	225.13	716.8	225.13
195.5	55365	195.5	60901.5		718.3	3755.6	718.3	3755.6		718.3	225	718.3	225
195.7	55311	195.7	60842.1		719.9	3939.8	719.9	3939.8		719.9	263.74	719.9	263.74
195.9	55363	195.9	60899.3		721.4	3938.1	721.4	3938.1		721.4	270.15	721.4	270.15
196.1	55326	196.1	60858.6		723	3919.9	723	3919.9		723	263.21	723	263.21
196.3	55242	196.3	60766.2		724.5	3828.9	724.5	3828.9		724.5	248.31	724.5	248.31
196.5	55273	196.5	60800.3		726.1	3788	726.1	3788		726.1	258.77	726.1	258.77
196.7	55228	196.7	60750.8		727.6	3822.2	727.6	3822.2		727.6	254.45	727.6	254.45
196.9	55185	196.9	60703.5		729.2	3885	729.2	3885		729.2	265.29	729.2	265.29
197.1	55208	197.1	60728.8		730.8	3875.1	730.8	3875.1		730.8	254.78	730.8	254.78
197.3	55282	197.3	60810.2		732.3	3744.1	732.3	3744.1		732.3	238.74	732.3	238.74
197.5	55099	197.5	60608.9		733.9	3701.6	733.9	3701.6		733.9	226.96	733.9	226.96
197.7	55136	197.7	60649.6		735.5	3702.6	735.5	3702.6		735.5	232.35	735.5	232.35
197.9	55176	197.9	60693.6		737.1	3763.3	737.1	3763.3		737.1	209.66	737.1	209.66
198.1	55069	198.1	60575.9		738.6	3771.4	738.6	3771.4		738.6	212.49	738.6	212.49
198.3	55048	198.3	60552.8		740.2	3794.4	740.2	3794.4		740.2	199.81	740.2	199.81
198.5	55060	198.5	60566		741.8	3880	741.8	3880		741.8	230.95	741.8	230.95
198.7	55017	198.7	60518.7		743.4	3849.8	743.4	3849.8		743.4	218.47	743.4	218.47
198.9	54967	198.9	60463.7		745	3850.6	745	3850.6		745	243.55	745	243.55
199.1	54960	199.1	60456		746.6	3849.2	746.6	3849.2		746.6	243.44	746.6	243.44
199.3	54973	199.3	60470.3		748.2	3818.8	748.2	3818.8		748.2	241.88	748.2	241.88
199.5	54858	199.5	60343.8		749.8	3688.1	749.8	3688.1		749.8	236.41	749.8	236.41
199.7	54853	199.7	60338.3		751.4	3576.7	751.4	3576.7		751.4	204.44	751.4	204.44
199.9	54824	199.9	60306.4		753	3665.6	753	3665.6		753	239.22	753	239.22
200.1	54765	200.1	60241.5		754.7	3709.6	754.7	3709.6		754.7	244.8	754.7	244.8
200.3	54766	200.3	60242.6		756.3	3737.7	756.3	3737.7		756.3	238.35	756.3	238.35
200.5	54842	200.5	60326.2		757.9	3740.8	757.9	3740.8		757.9	233.39	757.9	233.39
200.7	54759	200.7	60234.9		759.5	3734	759.5	3734		759.5	231.33	759.5	231.33
200.9	54669	200.9	60135.9		761.1	3701.2	761.1	3701.2		761.1	221.89	761.1	221.89
201.1	54683	201.1	60151.3		762.8	3693.4	762.8	3693.4		762.8	224.61	762.8	224.61
201.3	54749	201.3	60223.9		764.4	3723.8	764.4	3723.8		764.4	207.65	764.4	207.65
201.5	54704	201.5	60174.4		766.1	3695.1	766.1	3695.1		766.1	195.77	766.1	195.77
201.7	54591	201.7	60050.1		767.7	3669	767.7	3669		767.7	194.35	767.7	194.35
201.9	54608	201.9	60068.8		769.3	3623	769.3	3623		769.3	205.32	769.3	205.32
202.1	54668	202.1	60134.8		771	3650	771	3650		771	228.61	771	228.61
202.3	54587	202.3	60045.7		772.6	3654	772.6	3654		772.6	240.47	772.6	240.47
202.5	54507	202.5	59957.7		774.3	3676	774.3	3676		774.3	244.82	774.3	244.82
202.7	54547	202.7	60001.7		776	3638.3	776	3638.3		776	236.49	776	236.49
202.9	54539	202.9	59992.9		777.6	3634.7	777.6	3634.7		777.6	208.21	777.6	208.21
203.1	54565	203.1	60021.5		779.3	3606.7	779.3	3606.7		779.3	199.76	779.3	199.76
203.3	54490	203.3	59939		780.9	3564.1	780.9	3564.1		780.9	202.07	780.9	202.07
203.5	54608	203.5	60068.8		782.6	3568.1	782.6	3568.1		782.6	211.72	782.6	211.72
203.7	54535	203.7	59988.5		784.3	3566.5	784.3	3566.5		784.3	209.38	784.3	209.38
203.9	54522	203.9	59974.2		786	3554.4	786	3554.4		786	203.41	786	203.41
204.1	54546	204.1	60000.6		787.7	3482.2	787.7	3482.2		787.7	214.4	787.7	214.4
204.3	54591	204.3	60050.1		789.3	3553.1	789.3	3553.1		789.3	217.94	789.3	217.94
204.5	54589	204.5	60047.9		791	3530.9	791	3530.9		791	201.64	791	201.64
204.7	54515	204.7	59966.5		792.7	3511.7	792.7	3511.7		792.7	170.97	792.7	170.97
204.9	54388	204.9	59826.8		794.4	3518.9	794.4	3518.9		794.4	181.77	794.4	181.77
205.1	54425	205.1	59867.5		796.1	3537.1	796.1	3537.1		796.1	177.35	796.1	177.35
205.3	54404	205.3	59844.4		797.8	3528.2	797.8	3528.2		797.8	187.49	797.8	187.49
205.5	54353	205.5	59788.3		799.5	3541.6	799.5	3541.6		799.5	194.34	799.5	194.34
205.7	54243	205.7	59667.3		801.2	3499.4	801.2	3499.4		801.2	188.6	801.2	188.6
205.9	54163	205.9	59579.3		802.9	3523.1	802.9	3523.1		802.9	175.4	802.9	175.4
206.1	54205	206.1	59625.5		804.7	3542.6	804.7	3542.6		804.7	177.4	804.7	177.4
206.3	54176	206.3	59593.6		806.4	3489.7	806.4	3489.7		806.4	195.29	806.4	195.29
206.5	54215	206.5	59636.5		808.1	3470.2	808.1	3470.2		808.1	202.46	808.1	202.46
206.7	54106	206.7	59516.6		809.8	3502.1	809.8	3502.1		809.8	213.22	809.8	213.22
206.9	54097	206.9	59506.7		811.6	3464	811.6	3464		811.6	194.42	811.6	194.42
207.1	54063	207.1	59469.3		813.3	3485.9	813.3	3485.9		813.3	192.33	813.3	192.33
207.3	54102	207.3	59512.2		815	3465.6	815	3465.6		815	203.88	815	203.88
207.5	53989	207.5	59387.9		816.8	3402.1	816.8	3402.1		816.8	175.34	816.8	175.34
207.7	53948	207.7	59342.8		818.5	3280.9	818.5	3280.9		818.5	166.56	818.5	166.56
207.9	53890	207.9	59279		820.3	3281	820.3	3281		820.3	181.56	820.3	181.56
208.2	53899	208.2	59288.9		822	3416	822	3416		822	188.26	822	188.26
208.4	53912	208.4	59303.2		823.8	3460	823.8	3460		823.8	191.62	823.8	191.62
208.6	53824	208.6	59206.4		825.5	3437.9	825.5	3437.9		825.5	199.13	825.5	199.13
208.8	53780	208.8	59158		827.3	3433.5	827.3	3433.5		827.3	201.37	827.3	201.37
209	53774	209	59151.4		829	3254.8	829	3254.8		829	201.64	829	201.64
209.2	53815	209.2	59196.5		830.8	3404.4	830.8	3404.4		830.8	188.94	830.8	188.94
209.4	53853	209.4	59238.3		832.6	3450.2	832.6	3450.2		832.6	164.62	832.6	164.62
209.6	53815	209.6	59196.5		834.4	3370.5	834.4	3370.5		834.4	207.8	834.4	207.8
209.8	53787	209.8	59165.7		836.1	3302.1	836.1	3302.1		836.1	189.21	836.1	189.21
210	53817	210	59198.7		837.9	3297.4	837.9	3297.4		837.9	175.25	837.9	175.25
210.2	53755	210.2	59130.5		839.7	3307.8	839.7	3307.8		839.7	182.27	839.7	182.27
210.4	53808	210.4	59188.8		841.5	3313.9	841.5	3313.9		841.5	159.2	841.5	159.2
210.6	53814	210.6	59195.4		843.3	3399.3	843.3	3399.3		843.3	179.71	843.3	179.71
210.8	53908	210.8	59298.8		845.1	3396.3	845.1	3396.3		845.1	147.14	845.1	147.14
211	53841	211	59225.1		846.9	3370	846.9	3370		846.9	133.28	846.9	133.28
211.2	53732	211.2	59105.2		848.7	3325.2	848.7	3325.2		848.7	155.48	848.7	155.48
211.4	53675	211.4	59042.5		850.5	3316.9	850.5	3316.9		850.5	159.01	850.5	159.01
211.6	53644	211.6	59008.4		852.3	3292.1	852.3	3292.1		852.3	175.74	852.3	175.74
211.9	53606	211.9	58966.6		854.1	3219.9	854.1	3219.9		854.1	160.28	854.1	160.28
212.1	53540	212.1	58894		855.9	3221.6	855.9	3221.6		855.9	191.72	855.9	191.72
212.3	53529	212.3	58881.9		857.8	3277	857.8	3277		857.8	196.4	857.8	196.4
212.5	53470	212.5	58817		859.6	3179.7	859.6	3179.7		859.6	166.37	859.6	166.37
212.7	53446	212.7	58790.6		861.4	3183.3	861.4	3183.3		861.4	174.41	861.4	174.41
212.9	53389	212.9	58727.9		863.3	3091.2	863.3	3091.2		863.3	197.15	863.3	197.15
213.1	53421	213.1	58763.1		865.1	3194.5	865.1	3194.5		865.1	195.17	865.1	195.17
213.3	53444	213.3	58788.4		866.9	3179.4	866.9	3179.4		866.9	154.9	866.9	154.9
213.5	53451	213.5	58796.1		868.8	3192.9	868.8	3192.9		868.8	172.83	868.8	172.83
213.7	53479	213.7	58826.9		870.6	3253.2	870.6	3253.2		870.6	213.53	870.6	213.53
213.9	53513	213.9	58864.3		872.5	3241.4	872.5	3241.4		872.5	205.87	872.5	205.87
214.1	53479	214.1	58826.9		874.3	3209.9	874.3	3209.9		874.3	203.42	874.3	203.42
214.3	53501	214.3	58851.1		876.2	3154	876.2	3154		876.2	181.92	876.2	181.92
214.5	53365	214.5	58701.5		878.1	3215.5	878.1	3215.5		878.1	179.75	878.1	179.75
214.8	53329	214.8	58661.9		879.9	3197.6	879.9	3197.6		879.9	177.92	879.9	177.92
215	53334	215	58667.4		881.8	3199.9	881.8	3199.9		881.8	192.59	881.8	192.59
215.2	53343	215.2	58677.3		883.7	3213.7	883.7	3213.7		883.7	188.69	883.7	188.69
215.4	53408	215.4	58748.8		885.5	3149.1	885.5	3149.1		885.5	188.82	885.5	188.82
215.6	53338	215.6	58671.8		887.4	3080.6	887.4	3080.6		887.4	199.92	887.4	199.92
215.8	53282	215.8	58610.2		889.3	3193.5	889.3	3193.5		889.3	221.32	889.3	221.32
216	53267	216	58593.7		891.2	3124.7	891.2	3124.7		891.2	178.71	891.2	178.71
216.2	53214	216.2	58535.4		893.1	3148.3	893.1	3148.3		893.1	172.62	893.1	172.62
216.4	53256	216.4	58581.6		895	3137.5	895	3137.5		895	156.69	895	156.69
216.6	53177	216.6	58494.7		896.9	3146.3	896.9	3146.3		896.9	146.09	896.9	146.09
216.8	53203	216.8	58523.3		898.8	3166.3	898.8	3166.3		898.8	117	898.8	117
217	53160	217	58476		900.7	3166.6	900.7	3166.6		900.7	155.92	900.7	155.92
217.3	53119	217.3	58430.9		902.6	3123.8	902.6	3123.8		902.6	170.17	902.6	170.17
217.5	53152	217.5	58467.2		904.5	3070.1	904.5	3070.1		904.5	162.02	904.5	162.02
217.7	53140	217.7	58454		906.5	3045.5	906.5	3045.5		906.5	156.66	906.5	156.66
217.9	53074	217.9	58381.4		908.4	3063.1	908.4	3063.1		908.4	146.07	908.4	146.07
218.1	53054	218.1	58359.4		910.3	3142.7	910.3	3142.7		910.3	143.32	910.3	143.32
218.3	53015	218.3	58316.5		912.2	3129.3	912.2	3129.3		912.2	158.19	912.2	158.19
218.5	52995	218.5	58294.5		914.2	3116.3	914.2	3116.3		914.2	153.96	914.2	153.96
218.7	52982	218.7	58280.2		916.1	3124.9	916.1	3124.9		916.1	175.52	916.1	175.52
218.9	52985	218.9	58283.5		918.1	3077.6	918.1	3077.6		918.1	170.79	918.1	170.79
219.1	52947	219.1	58241.7		920	2953.4	920	2953.4		920	153.39	920	153.39
219.3	52911	219.3	58202.1		922	2866.9	922	2866.9		922	150.95	922	150.95
219.6	52903	219.6	58193.3		923.9	2855.5	923.9	2855.5		923.9	140.75	923.9	140.75
219.8	52918	219.8	58209.8		925.9	3067.2	925.9	3067.2		925.9	192.13	925.9	192.13
220	52949	220	58243.9		927.8	3136.9	927.8	3136.9		927.8	182.22	927.8	182.22
220.2	52965	220.2	58261.5		929.8	3061.8	929.8	3061.8		929.8	171.66	929.8	171.66
220.4	52969	220.4	58265.9		931.8	2836.2	931.8	2836.2		931.8	178.66	931.8	178.66
220.6	52926	220.6	58218.6		933.7	2836.2	933.7	2836.2		933.7	190.08	933.7	190.08
220.8	52948	220.8	58242.8		935.7	3060.2	935.7	3060.2		935.7	155.53	935.7	155.53
221	52978	221	58275.8		937.7	3062.4	937.7	3062.4		937.7	144.8	937.7	144.8
221.2	52889	221.2	58177.9		939.7	3050.2	939.7	3050.2		939.7	146.7	939.7	146.7
221.5	52900	221.5	58190		941.7	3047.3	941.7	3047.3		941.7	162.82	941.7	162.82
221.7	52881	221.7	58169.1		943.7	2947.4	943.7	2947.4		943.7	122.8	943.7	122.8
221.9	52888	221.9	58176.8		945.7	3001	945.7	3001		945.7	136.61	945.7	136.61
222.1	52758	222.1	58033.8		947.7	2895.2	947.7	2895.2		947.7	178.1	947.7	178.1
222.3	52796	222.3	58075.6		949.7	2798	949.7	2798		949.7	178.11	949.7	178.11
222.5	52770	222.5	58047		951.7	2801	951.7	2801		951.7	178.94	951.7	178.94
222.7	52754	222.7	58029.4		953.7	2972.2	953.7	2972.2		953.7	157.17	953.7	157.17
222.9	52762	222.9	58038.2		955.7	3058.5	955.7	3058.5		955.7	163.26	955.7	163.26
223.1	52800	223.1	58080		957.8	3001	957.8	3001		957.8	174.99	957.8	174.99
223.4	52705	223.4	57975.5		959.8	2955	959.8	2955		959.8	158.1	959.8	158.1
223.6	52696	223.6	57965.6		961.8	2919.9	961.8	2919.9		961.8	158.76	961.8	158.76
223.8	52701	223.8	57971.1		963.8	2873.5	963.8	2873.5		963.8	137.72	963.8	137.72
224	52667	224	57933.7		965.9	2909.5	965.9	2909.5		965.9	146.44	965.9	146.44
224.2	52619	224.2	57880.9		967.9	2925.2	967.9	2925.2		967.9	146.37	967.9	146.37
224.4	52635	224.4	57898.5		970	2915.5	970	2915.5		970	176.79	970	176.79
224.6	52647	224.6	57911.7		972	2860.7	972	2860.7		972	171.89	972	171.89
224.8	52553	224.8	57808.3		974.1	2766.2	974.1	2766.2		974.1	176.37	974.1	176.37
225.1	52579	225.1	57836.9		976.1	2754.4	976.1	2754.4		976.1	149.37	976.1	149.37
225.3	52618	225.3	57879.8		978.2	2843.4	978.2	2843.4		978.2	136.02	978.2	136.02
225.5	52581	225.5	57839.1		980.3	2923.2	980.3	2923.2		980.3	124.88	980.3	124.88
225.7	52597	225.7	57856.7		982.4	2908	982.4	2908		982.4	126.95	982.4	126.95
225.9	52480	225.9	57728		984.4	2731.9	984.4	2731.9		984.4	127.78	984.4	127.78
226.1	52484	226.1	57732.4		986.5	2674.5	986.5	2674.5		986.5	200.9	986.5	200.9
226.3	52567	226.3	57823.7		988.6	2738.6	988.6	2738.6		988.6	180.17	988.6	180.17
226.6	52437	226.6	57680.7		990.7	2800.1	990.7	2800.1		990.7	160.83	990.7	160.83
226.8	52425	226.8	57667.5		992.8	2885.8	992.8	2885.8		992.8	145.77	992.8	145.77
227	52392	227	57631.2		994.9	2906.6	994.9	2906.6		994.9	156.16	994.9	156.16
227.2	52327	227.2	57559.7		997	2988.4	997	2988.4		997	154.15	997	154.15
227.4	52351	227.4	57586.1		999.1	2940.7	999.1	2940.7		999.1	146.34	999.1	146.34
227.6	52301	227.6	57531.1		1001	2810.8	1001	2810.8		1001	131.5	1001	131.5
227.8	52227	227.8	57449.7		1003	2619.1	1003	2619.1		1003	116.74	1003	116.74
228.1	52269	228.1	57495.9		1005	2597	1005	2597		1005	132.5	1005	132.5
228.3	52301	228.3	57531.1		1008	2684	1008	2684		1008	140.83	1008	140.83
228.5	52219	228.5	57440.9		1010	2649.3	1010	2649.3		1010	139.89	1010	139.89
228.7	52156	228.7	57371.6		1012	2657.9	1012	2657.9		1012	150.58	1012	150.58
228.9	52198	228.9	57417.8		1014	2740.3	1014	2740.3		1014	158.57	1014	158.57
229.1	52167	229.1	57383.7		1016	2770.4	1016	2770.4		1016	141.64	1016	141.64
229.3	52120	229.3	57332		1018	2798.8	1018	2798.8		1018	142.03	1018	142.03
229.6	52100	229.6	57310		1020	2876.8	1020	2876.8		1020	130.44	1020	130.44
229.8	52106	229.8	57316.6		1023	2872	1023	2872		1023	146.98	1023	146.98
230	52080	230	57288		1025	2733.5	1025	2733.5		1025	155.3	1025	155.3
230.2	52121	230.2	57333.1		1027	2603.3	1027	2603.3		1027	130.51	1027	130.51
230.4	52145	230.4	57359.5		1029	2598.5	1029	2598.5		1029	144.81	1029	144.81
230.6	52097	230.6	57306.7		1031	2665.6	1031	2665.6		1031	141.89	1031	141.89
230.9	52088	230.9	57296.8		1033	2637.4	1033	2637.4		1033	150.85	1033	150.85
231.1	52069	231.1	57275.9		1036	2674.9	1036	2674.9		1036	131.89	1036	131.89
231.3	52121	231.3	57333.1		1038	2671.8	1038	2671.8		1038	127.54	1038	127.54
231.5	52135	231.5	57348.5		1040	2659.6	1040	2659.6		1040	111.9	1040	111.9
231.7	52098	231.7	57307.8		1042	2607.7	1042	2607.7		1042	103.06	1042	103.06
231.9	52033	231.9	57236.3		1044	2600.6	1044	2600.6		1044	124.67	1044	124.67
232.2	52058	232.2	57263.8		1047	2624.5	1047	2624.5		1047	126.28	1047	126.28
232.4	52108	232.4	57318.8		1049	2670.9	1049	2670.9		1049	149.31	1049	149.31
232.6	52062	232.6	57268.2		1051	2614.6	1051	2614.6		1051	122.8	1051	122.8
232.8	52032	232.8	57235.2		1053	2571.4	1053	2571.4		1053	98.837	1053	98.837
233	51993	233	57192.3		1055	2624.7	1055	2624.7		1055	129.28	1055	129.28
233.2	51905	233.2	57095.5		1058	2607	1058	2607		1058	134.69	1058	134.69
233.5	51825	233.5	57007.5		1060	2666.8	1060	2666.8		1060	151.27	1060	151.27
233.7	51825	233.7	57007.5		1062	2610.7	1062	2610.7		1062	149.93	1062	149.93
233.9	51816	233.9	56997.6		1064	2595.9	1064	2595.9		1064	143.97	1064	143.97
234.1	51840	234.1	57024		1067	2591.6	1067	2591.6		1067	124.72	1067	124.72
234.3	51865	234.3	57051.5		1069	2584.7	1069	2584.7		1069	138.05	1069	138.05
234.5	51857	234.5	57042.7		1071	2554	1071	2554		1071	143.89	1071	143.89
234.8	51780	234.8	56958		1073	2593.4	1073	2593.4		1073	150.52	1073	150.52
235	51774	235	56951.4		1076	2579.8	1076	2579.8		1076	121.44	1076	121.44
235.2	51754	235.2	56929.4		1078	2547.4	1078	2547.4		1078	122.54	1078	122.54
235.4	51712	235.4	56883.2		1080	2662.1	1080	2662.1		1080	122.81	1080	122.81
235.6	51749	235.6	56923.9		1082	2636.2	1082	2636.2		1082	127.41	1082	127.41
235.8	51826	235.8	57008.6		1085	2665.8	1085	2665.8		1085	123.46	1085	123.46
236.1	51847	236.1	57031.7		1087	2585.3	1087	2585.3		1087	120.04	1087	120.04
236.3	51859	236.3	57044.9		1089	2568.5	1089	2568.5		1089	152.15	1089	152.15
236.5	51798	236.5	56977.8		1091	2539.4	1091	2539.4		1091	162.53	1091	162.53
236.7	51763	236.7	56939.3		1094	2494.4	1094	2494.4		1094	124.26	1094	124.26
236.9	51713	236.9	56884.3		1096	2564.7	1096	2564.7		1096	106.18	1096	106.18
237.2	51701	237.2	56871.1		1098	2552.1	1098	2552.1		1098	110.44	1098	110.44
237.4	51762	237.4	56938.2		1101	2460	1101	2460		1101	130.4	1101	130.4
237.6	51774	237.6	56951.4		1103	2472.8	1103	2472.8		1103	125.55	1103	125.55
237.8	51738	237.8	56911.8		1105	2577.5	1105	2577.5		1105	137.52	1105	137.52
238	51671	238	56838.1		1108	2526	1108	2526		1108	113.36	1108	113.36
238.3	51577	238.3	56734.7		1110	2458.4	1110	2458.4		1110	114.66	1110	114.66
238.5	51569	238.5	56725.9		1112	2457.6	1112	2457.6		1112	123.82	1112	123.82
238.7	51600	238.7	56760		1115	2510.8	1115	2510.8		1115	133.83	1115	133.83
238.9	51613	238.9	56774.3		1117	2532.9	1117	2532.9		1117	127.47	1117	127.47
239.1	51560	239.1	56716		1119	2464.3	1119	2464.3		1119	103.63	1119	103.63
239.4	51486	239.4	56634.6		1122	2432.1	1122	2432.1		1122	148.68	1122	148.68
239.6	51461	239.6	56607.1		1124	2395.6	1124	2395.6		1124	153.76	1124	153.76
239.8	51487	239.8	56635.7		1126	2430.4	1126	2430.4		1126	147.43	1126	147.43
240	51412	240	56553.2		1129	2456.4	1129	2456.4		1129	134.53	1129	134.53
240.2	51351	240.2	56486.1		1131	2584.3	1131	2584.3		1131	116.72	1131	116.72
240.5	51243	240.5	56367.3		1134	2574.8	1134	2574.8		1134	104.61	1134	104.61
240.7	51210	240.7	56331		1136	2467.3	1136	2467.3		1136	121.97	1136	121.97
240.9	51201	240.9	56321.1		1138	2373.7	1138	2373.7		1138	139.74	1138	139.74
241.1	51174	241.1	56291.4		1141	2427.1	1141	2427.1		1141	107.12	1141	107.12
241.3	51164	241.3	56280.4		1143	2370.6	1143	2370.6		1143	145.11	1143	145.11
241.6	51116	241.6	56227.6		1145	2413	1145	2413		1145	122.29	1145	122.29
241.8	50998	241.8	56097.8		1148	2529.6	1148	2529.6		1148	99.417	1148	99.417
242	51086	242	56194.6		1150	2508.5	1150	2508.5		1150	110.59	1150	110.59
242.2	51155	242.2	56270.5		1153	2437.8	1153	2437.8		1153	107.46	1153	107.46
242.5	51147	242.5	56261.7		1155	2450	1155	2450		1155	107.31	1155	107.31
242.7	51131	242.7	56244.1		1158	2341.1	1158	2341.1		1158	120.21	1158	120.21
242.9	51073	242.9	56180.3		1160	2419.7	1160	2419.7		1160	85.616	1160	85.616
243.1	51121	243.1	56233.1		1162	2385.7	1162	2385.7		1162	99.605	1162	99.605
243.3	51204	243.3	56324.4		1165	2283.1	1165	2283.1		1165	90.08	1165	90.08
243.6	51233	243.6	56356.3		1167	2393.2	1167	2393.2		1167	127.64	1167	127.64
243.8	51129	243.8	56241.9		1170	2320.7	1170	2320.7		1170	120.86	1170	120.86
244	51076	244	56183.6		1172	2378.6	1172	2378.6		1172	115.73	1172	115.73
244.2	51102	244.2	56212.2		1175	2275.9	1175	2275.9		1175	124.09	1175	124.09
244.5	51102	244.5	56212.2		1177	2271.1	1177	2271.1		1177	120.68	1177	120.68
244.7	51150	244.7	56265		1180	2402.1	1180	2402.1		1180	110.45	1180	110.45
244.9	51136	244.9	56249.6		1182	2396	1182	2396		1182	108.43	1182	108.43
245.1	51120	245.1	56232		1185	2380.7	1185	2380.7		1185	101.04	1185	101.04
245.3	50981	245.3	56079.1		1187	2299.2	1187	2299.2		1187	113.02	1187	113.02
245.6	50892	245.6	55981.2		1190	2323.6	1190	2323.6		1190	118.16	1190	118.16
245.8	50786	245.8	55864.6		1192	2347.7	1192	2347.7		1192	89.167	1192	89.167
246	50647	246	55711.7		1195	2365	1195	2365		1195	80.837	1195	80.837
246.2	50533	246.2	55586.3		1197	2329	1197	2329		1197	82.675	1197	82.675
246.5	50422	246.5	55464.2		1200	2201.7	1200	2201.7		1200	76.057	1200	76.057
246.7	50433	246.7	55476.3		1202	2299.1	1202	2299.1		1202	93.091	1202	93.091
246.9	50496	246.9	55545.6		1205	2295	1205	2295		1205	98.859	1205	98.859
247.1	50414	247.1	55455.4		1207	2303.5	1207	2303.5		1207	77.856	1207	77.856
247.4	50315	247.4	55346.5		1210	2301.8	1210	2301.8		1210	115.83	1210	115.83
247.6	50400	247.6	55440		1212	2185.2	1212	2185.2		1212	105.89	1212	105.89
247.8	50448	247.8	55492.8		1215	2305.1	1215	2305.1		1215	130.01	1215	130.01
248	50236	248	55259.6		1217	2294	1217	2294		1217	124.35	1217	124.35
248.3	50193	248.3	55212.3		1220	2267.6	1220	2267.6		1220	107.75	1220	107.75
248.5	50469	248.5	55515.9		1222	2251.3	1222	2251.3		1222	111.76	1222	111.76
248.7	50375	248.7	55412.5		1225	2245.2	1225	2245.2		1225	94.38	1225	94.38
248.9	50241	248.9	55265.1		1227	2125.3	1227	2125.3		1227	105.12	1227	105.12
249.2	50283	249.2	55311.3		1230	2272.9	1230	2272.9		1230	107.26	1230	107.26
249.4	50279	249.4	55306.9		1233	2263.4	1233	2263.4		1233	121	1233	121
249.6	50173	249.6	55190.3		1235	2223.6	1235	2223.6		1235	99.135	1235	99.135
249.8	50267	249.8	55293.7		1238	2231.3	1238	2231.3		1238	99.605	1238	99.605
250.1	50449	250.1	55493.9		1240	2254	1240	2254		1240	113.73	1240	113.73
250.3	50224	250.3	55246.4		1243	2170.5	1243	2170.5		1243	128.74	1243	128.74
250.5	50170	250.5	55187		1246	2188.3	1246	2188.3		1246	103.42	1246	103.42
250.7	50260	250.7	55286		1248	2171.6	1248	2171.6		1248	97.534	1248	97.534
251	50239	251	55262.9		1251	2067.7	1251	2067.7		1251	80.8	1251	80.8
251.2	50348	251.2	55382.8		1253	2055.2	1253	2055.2		1253	111.39	1253	111.39
251.4	50485	251.4	55533.5		1256	2237.5	1256	2237.5		1256	52.17	1256	52.17
251.6	50404	251.6	55444.4		1259	2239.1	1259	2239.1		1259	120.37	1259	120.37
251.9	50404	251.9	55444.4		1261	2051.2	1261	2051.2		1261	117.71	1261	117.71
252.1	50354	252.1	55389.4		1264	2213.9	1264	2213.9		1264	113.1	1264	113.1
252.3	50309	252.3	55339.9		1267	2253.6	1267	2253.6		1267	118.39	1267	118.39
252.5	50212	252.5	55233.2		1269	2191.2	1269	2191.2		1269	97.292	1269	97.292
252.8	50261	252.8	55287.1		1272	2155.3	1272	2155.3		1272	88.731	1272	88.731
253	50268	253	55294.8		1275	2121.6	1275	2121.6		1275	136.69	1275	136.69
253.2	50061	253.2	55067.1		1277	2119.2	1277	2119.2		1277	144.2	1277	144.2
253.5	50178	253.5	55195.8		1280	2120.7	1280	2120.7		1280	112.88	1280	112.88
253.7	50069	253.7	55075.9		1283	2137	1283	2137		1283	103.85	1283	103.85
253.9	50031	253.9	55034.1		1285	2062.8	1285	2062.8		1285	114.38	1285	114.38
254.1	50029	254.1	55031.9		1288	2188.5	1288	2188.5		1288	99.617	1288	99.617
254.4	49918	254.4	54909.8		1291	2085.8	1291	2085.8		1291	95.883	1291	95.883
254.6	49972	254.6	54969.2		1293	2149.8	1293	2149.8		1293	130.9	1293	130.9
254.8	50053	254.8	55058.3		1296	2157.3	1296	2157.3		1296	111.11	1296	111.11
255	50036	255	55039.6		1299	2109.3	1299	2109.3		1299	108.39	1299	108.39
255.3	49941	255.3	54935.1		1301	2099.2	1301	2099.2		1301	112.21	1301	112.21
255.5	49993	255.5	54992.3		1304	2152.4	1304	2152.4		1304	88.051	1304	88.051
255.7	49809	255.7	54789.9		1307	2072.8	1307	2072.8		1307	93.561	1307	93.561
256	49927	256	54919.7		1310	2015.9	1310	2015.9		1310	96.498	1310	96.498
256.2	49904	256.2	54894.4		1312	2018.6	1312	2018.6		1312	91.896	1312	91.896
256.4	49950	256.4	54945		1315	2034.5	1315	2034.5		1315	135.25	1315	135.25
256.6	49954	256.6	54949.4		1318	2139.5	1318	2139.5		1318	131.15	1318	131.15
256.9	49893	256.9	54882.3		1321	2068	1321	2068		1321	74.035	1321	74.035
257.1	50009	257.1	55009.9		1323	2037.2	1323	2037.2		1323	47.749	1323	47.749
257.3	49948	257.3	54942.8		1326	2070.6	1326	2070.6		1326	58.108	1326	58.108
257.6	49861	257.6	54847.1		1329	2088.7	1329	2088.7		1329	87.75	1329	87.75
257.8	49904	257.8	54894.4		1332	2062.9	1332	2062.9		1332	78.222	1332	78.222
258	49867	258	54853.7		1334	2059.9	1334	2059.9		1334	85.357	1334	85.357
258.3	49857	258.3	54842.7		1337	1893	1337	1893		1337	83.108	1337	83.108
258.5	49884	258.5	54872.4		1340	2036.2	1340	2036.2		1340	62.826	1340	62.826
258.7	49747	258.7	54721.7		1343	2143.6	1343	2143.6		1343	53.657	1343	53.657
258.9	49775	258.9	54752.5		1346	2042.9	1346	2042.9		1346	55.205	1346	55.205
259.2	49652	259.2	54617.2		1348	1901.8	1348	1901.8		1348	126.61	1348	126.61
259.4	49633	259.4	54596.3		1351	2102	1351	2102		1351	104.71	1351	104.71
259.6	49594	259.6	54553.4		1354	2110.7	1354	2110.7		1354	108.31	1354	108.31
259.9	49445	259.9	54389.5		1357	2006.3	1357	2006.3		1357	147.33	1357	147.33
260.1	49440	260.1	54384		1360	1938.6	1360	1938.6		1360	129.91	1360	129.91
260.3	49399	260.3	54338.9		1362	1995.5	1362	1995.5		1362	83.297	1362	83.297
260.6	49458	260.6	54403.8		1365	1976.4	1365	1976.4		1365	92.813	1365	92.813
260.8	49377	260.8	54314.7		1368	1852	1368	1852		1368	80.511	1368	80.511
261	49467	261	54413.7		1371	2017.1	1371	2017.1		1371	73.292	1371	73.292
261.2	49492	261.2	54441.2		1374	2086.8	1374	2086.8		1374	57.439	1374	57.439
261.5	49408	261.5	54348.8		1377	2115.7	1377	2115.7		1377	119.67	1377	119.67
261.7	49473	261.7	54420.3		1380	1950	1380	1950		1380	132.88	1380	132.88
261.9	49390	261.9	54329		1382	1904.1	1382	1904.1		1382	89.957	1382	89.957
262.2	49479	262.2	54426.9		1385	1824.6	1385	1824.6		1385	82.886	1385	82.886
262.4	49489	262.4	54437.9		1388	1937.5	1388	1937.5		1388	68.093	1388	68.093
262.6	49652	262.6	54617.2		1391	1988.2	1391	1988.2		1391	69.327	1391	69.327
262.9	49583	262.9	54541.3		1394	1933.6	1394	1933.6		1394	67.32	1394	67.32
263.1	49616	263.1	54577.6		1397	1939.9	1397	1939.9		1397	32.357	1397	32.357
263.3	49652	263.3	54617.2		1400	1919.8	1400	1919.8		1400	69.342	1400	69.342
263.6	49667	263.6	54633.7		1403	1953.2	1403	1953.2		1403	116.2	1403	116.2
263.8	49659	263.8	54624.9		1406	1938.4	1406	1938.4		1406	93.365	1406	93.365
264	49667	264	54633.7		1409	2020.1	1409	2020.1		1409	91.556	1409	91.556
264.3	49804	264.3	54784.4		1412	1871.3	1412	1871.3		1412	75.614	1412	75.614
264.5	49711	264.5	54682.1		1415	1904.9	1415	1904.9		1415	92.425	1415	92.425
264.7	49736	264.7	54709.6		1417	2005	1417	2005		1417	84.367	1417	84.367
265	49758	265	54733.8		1420	1988.5	1420	1988.5		1420	79.19	1420	79.19
265.2	49838	265.2	54821.8		1423	1926.1	1423	1926.1		1423	102.98	1423	102.98
265.4	49793	265.4	54772.3		1426	1861.4	1426	1861.4		1426	81.401	1426	81.401
265.7	49812	265.7	54793.2		1429	1906.9	1429	1906.9		1429	59.967	1429	59.967
265.9	49775	265.9	54752.5		1432	1863	1432	1863		1432	110.25	1432	110.25
266.1	49813	266.1	54794.3		1435	1841	1435	1841		1435	89.507	1435	89.507
266.4	49826	266.4	54808.6		1438	1970.6	1438	1970.6		1438	102.48	1438	102.48
266.6	49883	266.6	54871.3		1441	1959.8	1441	1959.8		1441	78.268	1441	78.268
266.8	49831	266.8	54814.1		1444	1949.3	1444	1949.3		1444	80.669	1444	80.669
267.1	49850	267.1	54835		1447	1938.9	1447	1938.9		1447	45.372	1447	45.372
267.3	49718	267.3	54689.8		1450	1827.5	1450	1827.5		1450	59.785	1450	59.785
267.5	49800	267.5	54780		1453	1859.1	1453	1859.1		1453	65.61	1453	65.61
267.8	49676	267.8	54643.6		1456	1731.4	1456	1731.4		1456	73.788	1456	73.788
268	49746	268	54720.6		1459	1870.1	1459	1870.1		1459	71.296	1459	71.296
268.2	49660	268.2	54626		1462	1925.6	1462	1925.6		1462	61.337	1462	61.337
268.5	49722	268.5	54694.2		1465	1881.8	1465	1881.8		1465	97.047	1465	97.047
268.7	49615	268.7	54576.5		1468	1747.2	1468	1747.2		1468	81.219	1468	81.219
268.9	49652	268.9	54617.2		1472	1934	1472	1934		1472	100.04	1472	100.04
269.2	49692	269.2	54661.2		1475	1870.4	1475	1870.4		1475	86.025	1475	86.025
269.4	49643	269.4	54607.3		1478	1779.8	1478	1779.8		1478	64.605	1478	64.605
269.6	49688	269.6	54656.8		1481	1865.7	1481	1865.7		1481	56.551	1481	56.551
269.9	49664	269.9	54630.4		1484	1867.5	1484	1867.5		1484	86.346	1484	86.346
270.1	49667	270.1	54633.7		1487	1851.2	1487	1851.2		1487	76.595	1487	76.595
270.4	49659	270.4	54624.9		1490	1848.3	1490	1848.3		1490	87.843	1490	87.843
270.6	49645	270.6	54609.5		1493	1781	1493	1781		1493	70.642	1493	70.642
270.8	49508	270.8	54458.8		1496	1782.6	1496	1782.6		1496	65.584	1496	65.584
271.1	49531	271.1	54484.1		1499	1858.8	1499	1858.8		1499	61.513	1499	61.513
271.3	49398	271.3	54337.8		1502	1840.2	1502	1840.2		1502	61.386	1502	61.386
271.5	49433	271.5	54376.3		1506	1822	1506	1822		1506	79.329	1506	79.329
271.8	49396	271.8	54335.6		1509	1749	1509	1749		1509	54.774	1509	54.774
272	49284	272	54212.4		1512	1844.1	1512	1844.1		1512	84.364	1512	84.364
272.2	49275	272.2	54202.5		1515	1794.3	1515	1794.3		1515	92.428	1515	92.428
272.5	49174	272.5	54091.4		1518	1817.6	1518	1817.6		1518	83.622	1518	83.622
272.7	49203	272.7	54123.3		1521	1782.2	1521	1782.2		1521	74.265	1521	74.265
273	49112	273	54023.2		1524	1799.7	1524	1799.7		1524	79.156	1524	79.156
273.2	49107	273.2	54017.7		1528	1702.4	1528	1702.4		1528	83.556	1528	83.556
273.4	49037	273.4	53940.7		1531	1793.6	1531	1793.6		1531	58.951	1531	58.951
273.7	49030	273.7	53933		1534	1836.6	1534	1836.6		1534	77.026	1534	77.026
273.9	49041	273.9	53945.1		1537	1785.7	1537	1785.7		1537	62.61	1537	62.61
274.1	48905	274.1	53795.5		1540	1745.7	1540	1745.7		1540	40.407	1540	40.407
274.4	48977	274.4	53874.7		1544	1695.8	1544	1695.8		1544	76.415	1544	76.415
274.6	48972	274.6	53869.2		1547	1786.2	1547	1786.2		1547	59.537	1547	59.537
274.9	48981	274.9	53879.1		1550	1655.9	1550	1655.9		1550	73.616	1550	73.616
275.1	48992	275.1	53891.2		1553	1696.6	1553	1696.6		1553	58.434	1553	58.434
275.3	48891	275.3	53780.1		1556	1653.1	1556	1653.1		1556	68.847	1556	68.847
275.6	48944	275.6	53838.4		1560	1779.1	1560	1779.1		1560	65.878	1560	65.878
275.8	48816	275.8	53697.6		1563	1760.5	1563	1760.5		1563	33.927	1563	33.927
276	48782	276	53660.2		1566	1746	1566	1746		1566	57.81	1566	57.81
276.3	48822	276.3	53704.2		1569	1648	1569	1648		1569	93.794	1569	93.794
276.5	48754	276.5	53629.4		1573	1769.2	1573	1769.2		1573	88.975	1573	88.975
276.8	48787	276.8	53665.7		1576	1645.2	1576	1645.2		1576	66.585	1576	66.585
277	48836	277	53719.6		1579	1822.4	1579	1822.4		1579	71.682	1579	71.682
277.2	48780	277.2	53658		1582	1784.7	1582	1784.7		1582	56.258	1582	56.258
277.5	48856	277.5	53741.6		1586	1727.8	1586	1727.8		1586	60.256	1586	60.256
277.7	48791	277.7	53670.1		1589	1632.6	1589	1632.6		1589	69.132	1589	69.132
278	48823	278	53705.3		1592	1719.7	1592	1719.7		1592	76.085	1592	76.085
278.2	48829	278.2	53711.9		1596	1751.4	1596	1751.4		1596	84.896	1596	84.896
278.4	48767	278.4	53643.7		1599	1734.8	1599	1734.8		1599	96.456	1599	96.456
278.7	48834	278.7	53717.4		1602	1712.6	1602	1712.6		1602	87.119	1602	87.119
278.9	48755	278.9	53630.5		1606	1718.4	1606	1718.4		1606	86.784	1606	86.784
279.2	48674	279.2	53541.4		1609	1667.3	1609	1667.3		1609	60.407	1609	60.407
279.4	48696	279.4	53565.6		1612	1677.6	1612	1677.6		1612	61.842	1612	61.842
279.6	48581	279.6	53439.1		1616	1632.4	1616	1632.4		1616	77.215	1616	77.215
279.9	48501	279.9	53351.1		1619	1467.7	1619	1467.7		1619	75.025	1619	75.025
280.1	48504	280.1	53354.4		1622	1686.1	1622	1686.1		1622	70.053	1622	70.053
280.4	48489	280.4	53337.9		1626	1650.4	1626	1650.4		1626	69.281	1626	69.281
280.6	48403	280.6	53243.3		1629	1627.9	1629	1627.9		1629	73.935	1629	73.935
280.8	48379	280.8	53216.9		1632	1686.2	1632	1686.2		1632	70.132	1632	70.132
281.1	48288	281.1	53116.8		1636	1528.3	1636	1528.3		1636	79.145	1636	79.145
281.3	48178	281.3	52995.8		1639	1592.9	1639	1592.9		1639	44.467	1639	44.467
281.6	48240	281.6	53064		1643	1520.2	1643	1520.2		1643	96.139	1643	96.139
281.8	48223	281.8	53045.3		1646	1604.7	1646	1604.7		1646	58.388	1646	58.388
282	48171	282	52988.1		1649	1716.3	1649	1716.3		1649	68.697	1649	68.697
282.3	48211	282.3	53032.1		1653	1720.6	1653	1720.6		1653	74.326	1653	74.326
282.5	48267	282.5	53093.7		1656	1655.8	1656	1655.8		1656	93.166	1656	93.166
282.8	48239	282.8	53062.9		1660	1547.8	1660	1547.8		1660	42.906	1660	42.906
283	48239	283	53062.9		1663	1604.4	1663	1604.4		1663	40.793	1663	40.793
283.3	48315	283.3	53146.5		1667	1553.4	1667	1553.4		1667	95.634	1667	95.634
283.5	48224	283.5	53046.4		1670	1588.5	1670	1588.5		1670	78.029	1670	78.029
283.7	48199	283.7	53018.9		1673	1602.3	1673	1602.3		1673	73.422	1673	73.422
284	48290	284	53119		1677	1703.6	1677	1703.6		1677	66.958	1677	66.958
284.2	48400	284.2	53240		1680	1598.6	1680	1598.6		1680	72.102	1680	72.102
284.5	48343	284.5	53177.3		1684	1542.6	1684	1542.6		1684	77.647	1684	77.647
284.7	48344	284.7	53178.4		1687	1604.5	1687	1604.5		1687	55.358	1687	55.358
285	48359	285	53194.9		1691	1588.1	1691	1588.1		1691	32.685	1691	32.685
285.2	48357	285.2	53192.7		1694	1548.8	1694	1548.8		1694	73.623	1694	73.623
285.4	48336	285.4	53169.6		1698	1580.4	1698	1580.4		1698	64.851	1698	64.851
285.7	48324	285.7	53156.4		1701	1546.5	1701	1546.5		1701	82.786	1701	82.786
285.9	48307	285.9	53137.7		1705	1563.1	1705	1563.1		1705	70.33	1705	70.33
286.2	48230	286.2	53053		1708	1545.9	1708	1545.9		1708	61.866	1708	61.866
286.4	48202	286.4	53022.2		1712	1569.6	1712	1569.6		1712	58.156	1712	58.156
286.7	48241	286.7	53065.1		1715	1531.3	1715	1531.3		1715	57.873	1715	57.873
286.9	48195	286.9	53014.5		1719	1611.2	1719	1611.2		1719	72.159	1719	72.159
287.2	48143	287.2	52957.3		1723	1587.1	1723	1587.1		1723	100.28	1723	100.28
287.4	48102	287.4	52912.2		1726	1554.2	1726	1554.2		1726	78.35	1726	78.35
287.6	48154	287.6	52969.4		1730	1438.2	1730	1438.2		1730	33.963	1730	33.963
287.9	48041	287.9	52845.1		1733	1361.9	1733	1361.9		1733	45.224	1733	45.224
288.1	47951	288.1	52746.1		1737	1510.3	1737	1510.3		1737	57.164	1737	57.164
288.4	47904	288.4	52694.4		1741	1641.3	1741	1641.3		1741	58.988	1741	58.988
288.6	47913	288.6	52704.3		1744	1607.7	1744	1607.7		1744	62.832	1744	62.832
288.9	47873	288.9	52660.3		1748	1551.3	1748	1551.3		1748	69.916	1748	69.916
289.1	47872	289.1	52659.2		1751	1530	1751	1530		1751	61.171	1751	61.171
289.4	47843	289.4	52627.3		1755	1584.7	1755	1584.7		1755	92.028	1755	92.028
289.6	47850	289.6	52635		1759	1478.7	1759	1478.7		1759	81.803	1759	81.803
289.8	47778	289.8	52555.8		1762	1585.8	1762	1585.8		1762	73.812	1762	73.812
290.1	47735	290.1	52508.5		1766	1509	1766	1509		1766	39.102	1766	39.102
290.3	47730	290.3	52503		1770	1522	1770	1522		1770	39.352	1770	39.352
290.6	47736	290.6	52509.6		1773	1504	1773	1504		1773	44.907	1773	44.907
290.8	47728	290.8	52500.8		1777	1433.2	1777	1433.2		1777	44.823	1777	44.823
291.1	47690	291.1	52459		1781	1436	1781	1436		1781	44.546	1781	44.546
291.3	47662	291.3	52428.2		1784	1453.1	1784	1453.1		1784	73.185	1784	73.185
291.6	47693	291.6	52462.3		1788	1534.9	1788	1534.9		1788	61.554	1788	61.554
291.8	47652	291.8	52417.2		1792	1465	1792	1465		1792	92.783	1792	92.783
292.1	47595	292.1	52354.5		1795	1474.2	1795	1474.2		1795	72.583	1795	72.583
292.3	47545	292.3	52299.5		1799	1472.1	1799	1472.1		1799	35.418	1799	35.418
292.6	47430	292.6	52173		1803	1461.9	1803	1461.9		1803	20.21	1803	20.21
292.8	47430	292.8	52173
293	47381	293	52119.1
293.3	47394	293.3	52133.4
293.5	47446	293.5	52190.6
293.8	47399	293.8	52138.9
294	47448	294	52192.8
294.3	47468	294.3	52214.8
294.5	47410	294.5	52151
294.8	47497	294.8	52246.7
295	47480	295	52228
295.3	47420	295.3	52162
295.5	47409	295.5	52149.9
295.8	47433	295.8	52176.3
296	47505	296	52255.5
296.3	47527	296.3	52279.7
296.5	47533	296.5	52286.3
296.8	47551	296.8	52306.1
297	47542	297	52296.2
297.3	47557	297.3	52312.7
297.5	47649	297.5	52413.9
297.8	47626	297.8	52388.6
298	47579	298	52336.9
298.3	47530	298.3	52283
298.5	47479	298.5	52226.9
298.8	47452	298.8	52197.2
299	47397	299	52136.7
299.3	47415	299.3	52156.5
299.5	47461	299.5	52207.1
299.8	47463	299.8	52209.3
300	47480	300	52228
300.3	47446	300.3	52190.6
300.5	47411	300.5	52152.1
300.8	47397	300.8	52136.7
301	47404	301	52144.4
301.3	47393	301.3	52132.3
301.5	47378	301.5	52115.8
301.8	47404	301.8	52144.4
302	47422	302	52164.2
302.3	47444	302.3	52188.4
302.5	47459	302.5	52204.9
302.8	47463	302.8	52209.3
303	47504	303	52254.4
303.3	47472	303.3	52219.2
303.5	47453	303.5	52198.3
303.8	47410	303.8	52151
304	47451	304	52196.1
304.3	47453	304.3	52198.3
304.6	47447	304.6	52191.7
304.8	47398	304.8	52137.8
305.1	47310	305.1	52041
305.3	47293	305.3	52022.3
305.6	47276	305.6	52003.6
305.8	47305	305.8	52035.5
306.1	47320	306.1	52052
306.3	47288	306.3	52016.8
306.6	47280	306.6	52008
306.8	47318	306.8	52049.8
307.1	47310	307.1	52041
307.3	47294	307.3	52023.4
307.6	47355	307.6	52090.5
307.9	47371	307.9	52108.1
308.1	47326	308.1	52058.6
308.4	47347	308.4	52081.7
308.6	47403	308.6	52143.3
308.9	47395	308.9	52134.5
309.1	47367	309.1	52103.7
309.4	47281	309.4	52009.1
309.6	47232	309.6	51955.2
309.9	47226	309.9	51948.6
310.1	47301	310.1	52031.1
310.4	47254	310.4	51979.4
310.7	47342	310.7	52076.2
310.9	47332	310.9	52065.2
311.2	47294	311.2	52023.4
311.4	47242	311.4	51966.2
311.7	47154	311.7	51869.4
311.9	47104	311.9	51814.4
312.2	47103	312.2	51813.3
312.5	47101	312.5	51811.1
312.7	47019	312.7	51720.9
313	47001	313	51701.1
313.2	46960	313.2	51656
313.5	46935	313.5	51628.5
313.7	46845	313.7	51529.5
314	46789	314	51467.9
314.3	46669	314.3	51335.9
314.5	46601	314.5	51261.1
314.8	46529	314.8	51181.9
315	46512	315	51163.2
315.3	46381	315.3	51019.1
315.5	46399	315.5	51038.9
315.8	46384	315.8	51022.4
316.1	46370	316.1	51007
316.3	46293	316.3	50922.3
316.6	46294	316.6	50923.4
316.8	46325	316.8	50957.5
317.1	46218	317.1	50839.8
317.4	46200	317.4	50820
317.6	46190	317.6	50809
317.9	46198	317.9	50817.8
318.1	46258	318.1	50883.8
318.4	46238	318.4	50861.8
318.7	46209	318.7	50829.9
318.9	46390	318.9	51029
319.2	46353	319.2	50988.3
319.4	46405	319.4	51045.5
319.7	46409	319.7	51049.9
320	46351	320	50986.1
320.2	46335	320.2	50968.5
320.5	46286	320.5	50914.6
320.7	46215	320.7	50836.5
321	46266	321	50892.6
321.3	46302	321.3	50932.2
321.5	46287	321.5	50915.7
321.8	46277	321.8	50904.7
322	46291	322	50920.1
322.3	46237	322.3	50860.7
322.6	46262	322.6	50888.2
322.8	46185	322.8	50803.5
323.1	46237	323.1	50860.7
323.4	46197	323.4	50816.7
323.6	46221	323.6	50843.1
323.9	46172	323.9	50789.2
324.1	46243	324.1	50867.3
324.4	46136	324.4	50749.6
324.7	46208	324.7	50828.8
324.9	46256	324.9	50881.6
325.2	46238	325.2	50861.8
325.5	46237	325.5	50860.7
325.7	46170	325.7	50787
326	46190	326	50809
326.3	46153	326.3	50768.3
326.5	46136	326.5	50749.6
326.8	46104	326.8	50714.4
327	46011	327	50612.1
327.3	46032	327.3	50635.2
327.6	46002	327.6	50602.2
327.8	45976	327.8	50573.6
328.1	45977	328.1	50574.7
328.4	45981	328.4	50579.1
328.6	46025	328.6	50627.5
328.9	46109	328.9	50719.9
329.2	45947	329.2	50541.7
329.4	45884	329.4	50472.4
329.7	45898	329.7	50487.8
330	45921	330	50513.1
330.2	45801	330.2	50381.1
330.5	45781	330.5	50359.1
330.8	45817	330.8	50398.7
331	45776	331	50353.6
331.3	45826	331.3	50408.6
331.6	45826	331.6	50408.6
331.8	45878	331.8	50465.8
332.1	45885	332.1	50473.5
332.4	45808	332.4	50388.8
332.6	45731	332.6	50304.1
332.9	45608	332.9	50168.8
333.2	45421	333.2	49963.1
333.4	45305	333.4	49835.5
333.7	45254	333.7	49779.4
334	45257	334	49782.7
334.2	45194	334.2	49713.4
334.5	45248	334.5	49772.8
334.8	45260	334.8	49786
335	45297	335	49826.7
335.3	45350	335.3	49885
335.6	45423	335.6	49965.3
335.8	45486	335.8	50034.6
336.1	45520	336.1	50072
336.4	45581	336.4	50139.1
336.6	45539	336.6	50092.9
336.9	45525	336.9	50077.5
337.2	45592	337.2	50151.2
337.5	45533	337.5	50086.3
337.7	45538	337.7	50091.8
338	45572	338	50129.2
338.3	45449	338.3	49993.9
338.5	45471	338.5	50018.1
338.8	45446	338.8	49990.6
339.1	45398	339.1	49937.8
339.3	45408	339.3	49948.8
339.6	45444	339.6	49988.4
339.9	45363	339.9	49899.3
340.2	45360	340.2	49896
340.4	45374	340.4	49911.4
340.7	45223	340.7	49745.3
341	45265	341	49791.5
341.2	45136	341.2	49649.6
341.5	45059	341.5	49564.9
341.8	45004	341.8	49504.4
342.1	44995	342.1	49494.5
342.3	45044	342.3	49548.4
342.6	45088	342.6	49596.8
342.9	45125	342.9	49637.5
343.1	45182	343.1	49700.2
343.4	45051	343.4	49556.1
343.7	45010	343.7	49511
344	44907	344	49397.7
[truncated: 5,202 more rows]

## Sheet: Creep Data
130 °C					145 °C					160 °C					175 °C					190 °C
Interval Time	Creep Compliance	Shifted Interval Time	Shifted Creep Compliance		Interval Time	Creep Compliance	Shifted Interval Time	Shifted Creep Compliance		Interval Time	Creep Compliance	Shifted Interval Time	Shifted Creep Compliance		Interval Time	Creep Compliance	Shifted Interval Time	Shifted Creep Compliance		Interval Time	Creep Compliance	Shifted Interval Time	Shifted Creep Compliance
[s]	[1/Pa]	[s]	[1/Pa]		[s]	[1/Pa]	[s]	[1/Pa]		[s]	[1/Pa]	[s]	[1/Pa]		[s]	[1/Pa]	[s]	[1/Pa]		[s]	[1/Pa]	[s]	[1/Pa]
0.2012	3.32007e-06	0.2012	3.01825e-06		0.2012	5.55286e-06	0.2012	5.55286e-06		0.2011	9.77646e-06	0.2011	9.77646e-06		0.2011	1.49404e-05	0.2011	1.49404e-05		0.2009	2.60701e-05	0.2009	2.60701e-05
0.3013	3.62847e-06	0.3013	3.29861e-06		0.3013	6.02114e-06	0.3013	6.02114e-06		0.3012	1.0666e-05	0.3012	1.0666e-05		0.3012	1.72915e-05	0.3012	1.72915e-05		0.301	3.17121e-05	0.301	3.17121e-05
0.4014	3.8927e-06	0.4014	3.53882e-06		0.4014	6.37973e-06	0.4014	6.37973e-06		0.4013	1.15378e-05	0.4013	1.15378e-05		0.4013	1.91701e-05	0.4013	1.91701e-05		0.4009	3.63229e-05	0.4009	3.63229e-05
0.5015	4.10138e-06	0.5015	3.72852e-06		0.5015	6.66866e-06	0.5015	6.66866e-06		0.5024	1.21754e-05	0.5024	1.21754e-05		0.5024	2.10226e-05	0.5024	2.10226e-05		0.5019	4.07408e-05	0.5019	4.07408e-05
0.6011	4.26906e-06	0.6011	3.88096e-06		0.6011	6.88845e-06	0.6011	6.88845e-06		0.602	1.2807e-05	0.602	1.2807e-05		0.602	2.2554e-05	0.602	2.2554e-05		0.602	4.46722e-05	0.602	4.46722e-05
0.7012	4.40744e-06	0.7012	4.00676e-06		0.7022	7.1737e-06	0.7022	7.1737e-06		0.7031	1.3185e-05	0.7031	1.3185e-05		0.7031	2.37556e-05	0.7031	2.37556e-05		0.7029	4.84974e-05	0.7029	4.84974e-05
0.8013	4.57985e-06	0.8013	4.1635e-06		0.8023	7.36939e-06	0.8023	7.36939e-06		0.8032	1.37705e-05	0.8032	1.37705e-05		0.8032	2.55272e-05	0.8032	2.55272e-05		0.803	5.21239e-05	0.803	5.21239e-05
0.9014	4.66583e-06	0.9014	4.24167e-06		0.9024	7.5797e-06	0.9024	7.5797e-06		0.9042	1.41236e-05	0.9042	1.41236e-05		0.9042	2.64421e-05	0.9042	2.64421e-05		0.904	5.55055e-05	0.904	5.55055e-05
1.002	4.82018e-06	1.002	4.38198e-06		1.003	7.80736e-06	1.003	7.80736e-06		1.005	1.44867e-05	1.005	1.44867e-05		1.005	2.79249e-05	1.005	2.79249e-05		1.005	5.89666e-05	1.005	5.89666e-05
1.101	4.8904e-06	1.101	4.44582e-06		1.103	7.95256e-06	1.103	7.95256e-06		1.106	1.49897e-05	1.106	1.49897e-05		1.106	2.89725e-05	1.106	2.89725e-05		1.106	6.21015e-05	1.106	6.21015e-05
1.201	4.93177e-06	1.201	4.48342e-06		1.204	8.1806e-06	1.204	8.1806e-06		1.207	1.53404e-05	1.207	1.53404e-05		1.207	3.0299e-05	1.207	3.0299e-05		1.207	6.54102e-05	1.207	6.54102e-05
1.301	5.01921e-06	1.301	4.56292e-06		1.304	8.32593e-06	1.304	8.32593e-06		1.308	1.57279e-05	1.308	1.57279e-05		1.308	3.10423e-05	1.308	3.10423e-05		1.308	6.8352e-05	1.308	6.8352e-05
1.402	5.07237e-06	1.402	4.61125e-06		1.405	8.49246e-06	1.405	8.49246e-06		1.41	1.6034e-05	1.41	1.6034e-05		1.41	3.25244e-05	1.41	3.25244e-05		1.41	7.15042e-05	1.41	7.15042e-05
1.502	5.14516e-06	1.502	4.67742e-06		1.506	8.59493e-06	1.506	8.59493e-06		1.511	1.65264e-05	1.511	1.65264e-05		1.511	3.33907e-05	1.511	3.33907e-05		1.511	7.43204e-05	1.511	7.43204e-05
1.602	5.17406e-06	1.602	4.70369e-06		1.607	8.76523e-06	1.607	8.76523e-06		1.613	1.67142e-05	1.613	1.67142e-05		1.613	3.45666e-05	1.613	3.45666e-05		1.613	7.73158e-05	1.613	7.73158e-05
1.702	5.27037e-06	1.702	4.79125e-06		1.707	8.9084e-06	1.707	8.9084e-06		1.714	1.70186e-05	1.714	1.70186e-05		1.714	3.53128e-05	1.714	3.53128e-05		1.714	8.00056e-05	1.714	8.00056e-05
1.802	5.26811e-06	1.802	4.78919e-06		1.808	8.99899e-06	1.808	8.99899e-06		1.816	1.73203e-05	1.816	1.73203e-05		1.816	3.66938e-05	1.816	3.66938e-05		1.816	8.28389e-05	1.816	8.28389e-05
1.903	5.32369e-06	1.903	4.83972e-06		1.909	9.15599e-06	1.909	9.15599e-06		1.918	1.7586e-05	1.918	1.7586e-05		1.918	3.75748e-05	1.918	3.75748e-05		1.918	8.55676e-05	1.918	8.55676e-05
2.003	5.39332e-06	2.003	4.90302e-06		2.01	9.29634e-06	2.01	9.29634e-06		2.02	1.77785e-05	2.02	1.77785e-05		2.02	3.85155e-05	2.02	3.85155e-05		2.02	8.83374e-05	2.02	8.83374e-05
2.103	5.46903e-06	2.103	4.97185e-06		2.111	9.37152e-06	2.111	9.37152e-06		2.122	1.81322e-05	2.122	1.81322e-05		2.122	3.91532e-05	2.122	3.91532e-05		2.122	9.0953e-05	2.122	9.0953e-05
2.203	5.52707e-06	2.203	5.02461e-06		2.212	9.5224e-06	2.212	9.5224e-06		2.224	1.84125e-05	2.224	1.84125e-05		2.224	4.04748e-05	2.224	4.04748e-05		2.224	9.3577e-05	2.224	9.3577e-05
2.304	5.59961e-06	2.304	5.09056e-06		2.314	9.5957e-06	2.314	9.5957e-06		2.326	1.86918e-05	2.326	1.86918e-05		2.326	4.10529e-05	2.326	4.10529e-05		2.326	9.62384e-05	2.326	9.62384e-05
2.404	5.63958e-06	2.404	5.12689e-06		2.414	9.74235e-06	2.414	9.74235e-06		2.428	1.89669e-05	2.428	1.89669e-05		2.428	4.2009e-05	2.428	4.2009e-05		2.428	9.88117e-05	2.428	9.88117e-05
2.504	5.65844e-06	2.504	5.14404e-06		2.516	9.81619e-06	2.516	9.81619e-06		2.531	1.92042e-05	2.531	1.92042e-05		2.531	4.27307e-05	2.531	4.27307e-05		2.531	0.000101453	2.531	0.000101453
2.605	5.7284e-06	2.605	5.20763e-06		2.617	9.97609e-06	2.617	9.97609e-06		2.633	1.95733e-05	2.633	1.95733e-05		2.633	4.38723e-05	2.633	4.38723e-05		2.633	0.000104022	2.633	0.000104022
2.705	5.76677e-06	2.705	5.24252e-06		2.718	1.00363e-05	2.718	1.00363e-05		2.736	1.97151e-05	2.736	1.97151e-05		2.736	4.4607e-05	2.736	4.4607e-05		2.736	0.000106657	2.736	0.000106657
2.805	5.80352e-06	2.805	5.27593e-06		2.82	1.01368e-05	2.82	1.01368e-05		2.839	1.99889e-05	2.839	1.99889e-05		2.839	4.57736e-05	2.839	4.57736e-05		2.839	0.000109167	2.839	0.000109167
2.906	5.80849e-06	2.906	5.28044e-06		2.921	1.02553e-05	2.921	1.02553e-05		2.942	2.00822e-05	2.942	2.00822e-05		2.942	4.64976e-05	2.942	4.64976e-05		2.942	0.000111685	2.942	0.000111685
3.006	5.85534e-06	3.006	5.32303e-06		3.023	1.036e-05	3.023	1.036e-05		3.045	2.04118e-05	3.045	2.04118e-05		3.045	4.77688e-05	3.045	4.77688e-05		3.045	0.000114087	3.045	0.000114087
3.106	5.84848e-06	3.106	5.3168e-06		3.124	1.04638e-05	3.124	1.04638e-05		3.148	2.04996e-05	3.148	2.04996e-05		3.148	4.84833e-05	3.148	4.84833e-05		3.148	0.000116574	3.148	0.000116574
3.207	5.89496e-06	3.207	5.35906e-06		3.226	1.05447e-05	3.226	1.05447e-05		3.251	2.07853e-05	3.251	2.07853e-05		3.251	4.93703e-05	3.251	4.93703e-05		3.251	0.000118966	3.251	0.000118966
3.307	5.94258e-06	3.307	5.40235e-06		3.327	1.06981e-05	3.327	1.06981e-05		3.354	2.09522e-05	3.354	2.09522e-05		3.354	4.98087e-05	3.354	4.98087e-05		3.354	0.000121339	3.354	0.000121339
3.408	5.94066e-06	3.408	5.4006e-06		3.429	1.07741e-05	3.429	1.07741e-05		3.458	2.1457e-05	3.458	2.1457e-05		3.458	5.08914e-05	3.458	5.08914e-05		3.458	0.000123713	3.458	0.000123713
3.508	5.99097e-06	3.508	5.44633e-06		3.531	1.08836e-05	3.531	1.08836e-05		3.561	2.16156e-05	3.561	2.16156e-05		3.561	5.1505e-05	3.561	5.1505e-05		3.561	0.000126011	3.561	0.000126011
3.608	6.01616e-06	3.608	5.46924e-06		3.632	1.0969e-05	3.632	1.0969e-05		3.665	2.19067e-05	3.665	2.19067e-05		3.665	5.24245e-05	3.665	5.24245e-05		3.665	0.000128419	3.665	0.000128419
3.709	6.07077e-06	3.709	5.51889e-06		3.734	1.10839e-05	3.734	1.10839e-05		3.768	2.20886e-05	3.768	2.20886e-05		3.768	5.28998e-05	3.768	5.28998e-05		3.768	0.000130682	3.768	0.000130682
3.809	6.06122e-06	3.809	5.5102e-06		3.837	1.11716e-05	3.837	1.11716e-05		3.872	2.23414e-05	3.872	2.23414e-05		3.872	5.41789e-05	3.872	5.41789e-05		3.872	0.000133066	3.872	0.000133066
3.91	6.11545e-06	3.91	5.5595e-06		3.939	1.12058e-05	3.939	1.12058e-05		3.976	2.25041e-05	3.976	2.25041e-05		3.976	5.49196e-05	3.976	5.49196e-05		3.976	0.00013524	3.976	0.00013524
4.01	6.12904e-06	4.01	5.57185e-06		4.04	1.13437e-05	4.04	1.13437e-05		4.08	2.28348e-05	4.08	2.28348e-05		4.08	5.58779e-05	4.08	5.58779e-05		4.08	0.000137608	4.08	0.000137608
4.111	6.16184e-06	4.111	5.60167e-06		4.142	1.14208e-05	4.142	1.14208e-05		4.184	2.31598e-05	4.184	2.31598e-05		4.184	5.6333e-05	4.184	5.6333e-05		4.184	0.000139746	4.184	0.000139746
4.212	6.19725e-06	4.212	5.63386e-06		4.244	1.15241e-05	4.244	1.15241e-05		4.288	2.34835e-05	4.288	2.34835e-05		4.288	5.6996e-05	4.288	5.6996e-05		4.288	0.000142154	4.288	0.000142154
4.312	6.2216e-06	4.312	5.656e-06		4.346	1.15805e-05	4.346	1.15805e-05		4.393	2.37276e-05	4.393	2.37276e-05		4.393	5.7846e-05	4.393	5.7846e-05		4.393	0.000144323	4.393	0.000144323
4.412	6.24695e-06	4.412	5.67904e-06		4.448	1.17164e-05	4.448	1.17164e-05		4.497	2.38618e-05	4.497	2.38618e-05		4.497	5.87189e-05	4.497	5.87189e-05		4.497	0.000146737	4.497	0.000146737
4.513	6.28198e-06	4.513	5.71089e-06		4.551	1.17972e-05	4.551	1.17972e-05		4.601	2.41942e-05	4.601	2.41942e-05		4.601	5.98667e-05	4.601	5.98667e-05		4.601	0.000148907	4.601	0.000148907
4.614	6.3169e-06	4.614	5.74264e-06		4.653	1.18709e-05	4.653	1.18709e-05		4.706	2.43503e-05	4.706	2.43503e-05		4.706	6.01721e-05	4.706	6.01721e-05		4.706	0.000151283	4.706	0.000151283
4.714	6.30721e-06	4.714	5.73383e-06		4.755	1.19874e-05	4.755	1.19874e-05		4.811	2.48274e-05	4.811	2.48274e-05		4.811	6.10555e-05	4.811	6.10555e-05		4.811	0.000153524	4.811	0.000153524
4.815	6.34986e-06	4.815	5.7726e-06		4.858	1.20552e-05	4.858	1.20552e-05		4.916	2.49496e-05	4.916	2.49496e-05		4.916	6.1468e-05	4.916	6.1468e-05		4.916	0.00015585	4.916	0.00015585
4.915	6.40269e-06	4.915	5.82062e-06		4.961	1.21807e-05	4.961	1.21807e-05		5.021	2.5241e-05	5.021	2.5241e-05		5.021	6.27899e-05	5.021	6.27899e-05		5.021	0.000158291	5.021	0.000158291
5.016	6.4483e-06	5.016	5.86209e-06		5.064	1.22529e-05	5.064	1.22529e-05		5.126	2.54657e-05	5.126	2.54657e-05		5.126	6.335e-05	5.126	6.335e-05		5.126	0.000160544	5.126	0.000160544
5.117	6.48342e-06	5.117	5.89401e-06		5.165	1.23601e-05	5.165	1.23601e-05		5.231	2.58832e-05	5.231	2.58832e-05		5.231	6.43031e-05	5.231	6.43031e-05		5.231	0.000162903	5.231	0.000162903
5.217	6.52013e-06	5.217	5.92739e-06		5.268	1.24699e-05	5.268	1.24699e-05		5.336	2.63299e-05	5.336	2.63299e-05		5.336	6.49062e-05	5.336	6.49062e-05		5.336	0.000165033	5.336	0.000165033
5.318	6.55809e-06	5.318	5.9619e-06		5.37	1.25919e-05	5.37	1.25919e-05		5.441	2.65562e-05	5.441	2.65562e-05		5.441	6.562e-05	5.441	6.562e-05		5.441	0.000167468	5.441	0.000167468
5.419	6.60098e-06	5.419	6.00089e-06		5.473	1.2628e-05	5.473	1.2628e-05		5.547	2.66616e-05	5.547	2.66616e-05		5.547	6.67013e-05	5.547	6.67013e-05		5.547	0.000169625	5.547	0.000169625
5.519	6.62276e-06	5.519	6.02069e-06		5.576	1.27277e-05	5.576	1.27277e-05		5.652	2.69178e-05	5.652	2.69178e-05		5.652	6.68832e-05	5.652	6.68832e-05		5.652	0.000171969	5.652	0.000171969
5.62	6.67881e-06	5.62	6.07165e-06		5.679	1.27521e-05	5.679	1.27521e-05		5.758	2.73312e-05	5.758	2.73312e-05		5.758	6.78537e-05	5.758	6.78537e-05		5.758	0.000174199	5.758	0.000174199
5.721	6.70326e-06	5.721	6.09388e-06		5.781	1.28571e-05	5.781	1.28571e-05		5.864	2.75077e-05	5.864	2.75077e-05		5.864	6.86338e-05	5.864	6.86338e-05		5.864	0.000176444	5.864	0.000176444
5.821	6.74917e-06	5.821	6.1356e-06		5.884	1.28564e-05	5.884	1.28564e-05		5.97	2.76762e-05	5.97	2.76762e-05		5.97	6.9436e-05	5.97	6.9436e-05		5.97	0.000178787	5.97	0.000178787
5.922	6.79404e-06	5.922	6.1764e-06		5.987	1.2861e-05	5.987	1.2861e-05		6.076	2.79736e-05	6.076	2.79736e-05		6.076	7.03527e-05	6.076	7.03527e-05		6.076	0.000180935	6.076	0.000180935
6.024	6.7925e-06	6.024	6.175e-06		6.09	1.29139e-05	6.09	1.29139e-05		6.182	2.8372e-05	6.182	2.8372e-05		6.182	7.05851e-05	6.182	7.05851e-05		6.182	0.000183325	6.182	0.000183325
6.124	6.83796e-06	6.124	6.21633e-06		6.193	1.29624e-05	6.193	1.29624e-05		6.288	2.84131e-05	6.288	2.84131e-05		6.288	7.1935e-05	6.288	7.1935e-05		6.288	0.000185433	6.288	0.000185433
6.224	6.86322e-06	6.224	6.23929e-06		6.296	1.30487e-05	6.296	1.30487e-05		6.394	2.85545e-05	6.394	2.85545e-05		6.394	7.2127e-05	6.394	7.2127e-05		6.394	0.000187813	6.394	0.000187813
6.325	6.87967e-06	6.325	6.25425e-06		6.4	1.31102e-05	6.4	1.31102e-05		6.501	2.88903e-05	6.501	2.88903e-05		6.501	7.28059e-05	6.501	7.28059e-05		6.501	0.000190042	6.501	0.000190042
6.426	6.88068e-06	6.426	6.25516e-06		6.503	1.31874e-05	6.503	1.31874e-05		6.607	2.90388e-05	6.607	2.90388e-05		6.607	7.37481e-05	6.607	7.37481e-05		6.607	0.000192182	6.607	0.000192182
6.527	6.91989e-06	6.527	6.29081e-06		6.606	1.3284e-05	6.606	1.3284e-05		6.714	2.91597e-05	6.714	2.91597e-05		6.714	7.42426e-05	6.714	7.42426e-05		6.714	0.000194559	6.714	0.000194559
6.628	6.94569e-06	6.628	6.31426e-06		6.709	1.33195e-05	6.709	1.33195e-05		6.821	2.94222e-05	6.821	2.94222e-05		6.821	7.51975e-05	6.821	7.51975e-05		6.821	0.000196618	6.821	0.000196618
6.728	6.95341e-06	6.728	6.32128e-06		6.814	1.33645e-05	6.814	1.33645e-05		6.928	2.97579e-05	6.928	2.97579e-05		6.928	7.58186e-05	6.928	7.58186e-05		6.928	0.000198929	6.928	0.000198929
6.829	6.96644e-06	6.829	6.33312e-06		6.916	1.33606e-05	6.916	1.33606e-05		7.035	2.98517e-05	7.035	2.98517e-05		7.035	7.65757e-05	7.035	7.65757e-05		7.035	0.000201133	7.035	0.000201133
6.93	7.02877e-06	6.93	6.38979e-06		7.02	1.33976e-05	7.02	1.33976e-05		7.142	3.00567e-05	7.142	3.00567e-05		7.142	7.73868e-05	7.142	7.73868e-05		7.142	0.000203268	7.142	0.000203268
7.031	7.04931e-06	7.031	6.40846e-06		7.123	1.34336e-05	7.123	1.34336e-05		7.249	3.04415e-05	7.249	3.04415e-05		7.249	7.78789e-05	7.249	7.78789e-05		7.249	0.000205618	7.249	0.000205618
7.132	7.05707e-06	7.132	6.41552e-06		7.227	1.35176e-05	7.227	1.35176e-05		7.356	3.03436e-05	7.356	3.03436e-05		7.356	7.91003e-05	7.356	7.91003e-05		7.356	0.000207735	7.356	0.000207735
7.233	7.14482e-06	7.233	6.49529e-06		7.33	1.36161e-05	7.33	1.36161e-05		7.464	3.07467e-05	7.464	3.07467e-05		7.464	7.92707e-05	7.464	7.92707e-05		7.464	0.000210135	7.464	0.000210135
7.334	7.17972e-06	7.334	6.52702e-06		7.434	1.36797e-05	7.434	1.36797e-05		7.571	3.08695e-05	7.571	3.08695e-05		7.571	8.0063e-05	7.571	8.0063e-05		7.571	0.000212317	7.571	0.000212317
7.435	7.21405e-06	7.435	6.55823e-06		7.538	1.37634e-05	7.538	1.37634e-05		7.679	3.09389e-05	7.679	3.09389e-05		7.679	8.10098e-05	7.679	8.10098e-05		7.679	0.000214544	7.679	0.000214544
7.535	7.23868e-06	7.535	6.58061e-06		7.642	1.37561e-05	7.642	1.37561e-05		7.786	3.14217e-05	7.786	3.14217e-05		7.786	8.13167e-05	7.786	8.13167e-05		7.786	0.000216868	7.786	0.000216868
7.636	7.30475e-06	7.636	6.64068e-06		7.745	1.38172e-05	7.745	1.38172e-05		7.894	3.14361e-05	7.894	3.14361e-05		7.894	8.23527e-05	7.894	8.23527e-05		7.894	0.000219002	7.894	0.000219002
7.737	7.28896e-06	7.737	6.62633e-06		7.849	1.37764e-05	7.849	1.37764e-05		8.002	3.16435e-05	8.002	3.16435e-05		8.002	8.31054e-05	8.002	8.31054e-05		8.002	0.000221236	8.002	0.000221236
7.838	7.33916e-06	7.838	6.67196e-06		7.953	1.38717e-05	7.953	1.38717e-05		8.11	3.20627e-05	8.11	3.20627e-05		8.11	8.34842e-05	8.11	8.34842e-05		8.11	0.000223491	8.11	0.000223491
7.94	7.3521e-06	7.94	6.68373e-06		8.057	1.38958e-05	8.057	1.38958e-05		8.218	3.20495e-05	8.218	3.20495e-05		8.218	8.43814e-05	8.218	8.43814e-05		8.218	0.000225553	8.218	0.000225553
8.04	7.34888e-06	8.04	6.6808e-06		8.161	1.40233e-05	8.161	1.40233e-05		8.327	3.24358e-05	8.327	3.24358e-05		8.327	8.49805e-05	8.327	8.49805e-05		8.327	0.000227902	8.327	0.000227902
8.141	7.37663e-06	8.141	6.70603e-06		8.265	1.40441e-05	8.265	1.40441e-05		8.435	3.25227e-05	8.435	3.25227e-05		8.435	8.56874e-05	8.435	8.56874e-05		8.435	0.000230041	8.435	0.000230041
8.242	7.41104e-06	8.242	6.73731e-06		8.37	1.40967e-05	8.37	1.40967e-05		8.543	3.26331e-05	8.543	3.26331e-05		8.543	8.64527e-05	8.543	8.64527e-05		8.543	0.000232202	8.543	0.000232202
8.343	7.43934e-06	8.343	6.76303e-06		8.474	1.4092e-05	8.474	1.4092e-05		8.652	3.30023e-05	8.652	3.30023e-05		8.652	8.73101e-05	8.652	8.73101e-05		8.652	0.000234516	8.652	0.000234516
8.444	7.4609e-06	8.444	6.78263e-06		8.578	1.4187e-05	8.578	1.4187e-05		8.761	3.30648e-05	8.761	3.30648e-05		8.761	8.75771e-05	8.761	8.75771e-05		8.761	0.000236646	8.761	0.000236646
8.545	7.49188e-06	8.545	6.8108e-06		8.682	1.42466e-05	8.682	1.42466e-05		8.87	3.33431e-05	8.87	3.33431e-05		8.87	8.8831e-05	8.87	8.8831e-05		8.87	0.000238764	8.87	0.000238764
8.648	7.52914e-06	8.648	6.84467e-06		8.787	1.43923e-05	8.787	1.43923e-05		8.979	3.34653e-05	8.979	3.34653e-05		8.979	8.93417e-05	8.979	8.93417e-05		8.979	0.000241099	8.979	0.000241099
8.748	7.52523e-06	8.748	6.84112e-06		8.891	1.43963e-05	8.891	1.43963e-05		9.088	3.38331e-05	9.088	3.38331e-05		9.088	8.96726e-05	9.088	8.96726e-05		9.088	0.000243054	9.088	0.000243054
8.849	7.54569e-06	8.849	6.85972e-06		8.996	1.44545e-05	8.996	1.44545e-05		9.197	3.39177e-05	9.197	3.39177e-05		9.197	9.08231e-05	9.197	9.08231e-05		9.197	0.000245214	9.197	0.000245214
8.95	7.56831e-06	8.95	6.88028e-06		9.1	1.44271e-05	9.1	1.44271e-05		9.306	3.42878e-05	9.306	3.42878e-05		9.306	9.09717e-05	9.306	9.09717e-05		9.306	0.000247451	9.306	0.000247451
9.051	7.58261e-06	9.051	6.89328e-06		9.205	1.45804e-05	9.205	1.45804e-05		9.415	3.43965e-05	9.415	3.43965e-05		9.415	9.19116e-05	9.415	9.19116e-05		9.415	0.000249363	9.415	0.000249363
9.152	7.57156e-06	9.152	6.88324e-06		9.309	1.46254e-05	9.309	1.46254e-05		9.525	3.466e-05	9.525	3.466e-05		9.525	9.26817e-05	9.525	9.26817e-05		9.525	0.000251535	9.525	0.000251535
9.253	7.5762e-06	9.253	6.88746e-06		9.414	1.47237e-05	9.414	1.47237e-05		9.634	3.48301e-05	9.634	3.48301e-05		9.634	9.35119e-05	9.634	9.35119e-05		9.634	0.000253717	9.634	0.000253717
9.354	7.60793e-06	9.354	6.9163e-06		9.519	1.47327e-05	9.519	1.47327e-05		9.744	3.49622e-05	9.744	3.49622e-05		9.744	9.38154e-05	9.744	9.38154e-05		9.744	0.000255705	9.744	0.000255705
9.456	7.59776e-06	9.456	6.90705e-06		9.624	1.47502e-05	9.624	1.47502e-05		9.854	3.52475e-05	9.854	3.52475e-05		9.854	9.48958e-05	9.854	9.48958e-05		9.854	0.000257865	9.854	0.000257865
9.557	7.59196e-06	9.557	6.90179e-06		9.728	1.47867e-05	9.728	1.47867e-05		9.964	3.54642e-05	9.964	3.54642e-05		9.964	9.54404e-05	9.964	9.54404e-05		9.964	0.000260091	9.964	0.000260091
9.658	7.61467e-06	9.658	6.92242e-06		9.833	1.48804e-05	9.833	1.48804e-05		10.07	3.56031e-05	10.07	3.56031e-05		10.07	9.60704e-05	10.07	9.60704e-05		10.07	0.000262048	10.07	0.000262048
9.759	7.65253e-06	9.759	6.95684e-06		9.939	1.49014e-05	9.939	1.49014e-05		10.18	3.58802e-05	10.18	3.58802e-05		10.18	9.68072e-05	10.18	9.68072e-05		10.18	0.000264281	10.18	0.000264281
9.86	7.62539e-06	9.86	6.93218e-06		10.04	1.4923e-05	10.04	1.4923e-05		10.29	3.6071e-05	10.29	3.6071e-05		10.29	9.76622e-05	10.29	9.76622e-05		10.29	0.0002666	10.29	0.0002666
9.962	7.66808e-06	9.962	6.97098e-06		10.15	1.48822e-05	10.15	1.48822e-05		10.4	3.62472e-05	10.4	3.62472e-05		10.4	9.7855e-05	10.4	9.7855e-05		10.4	0.000268623	10.4	0.000268623
10.06	7.66483e-06	10.06	6.96803e-06		10.25	1.50003e-05	10.25	1.50003e-05		10.52	3.64676e-05	10.52	3.64676e-05		10.52	9.88735e-05	10.52	9.88735e-05		10.51	0.000270853	10.51	0.000270853
10.16	7.68132e-06	10.16	6.98302e-06		10.36	1.50458e-05	10.36	1.50458e-05		10.63	3.67343e-05	10.63	3.67343e-05		10.63	9.95457e-05	10.63	9.95457e-05		10.63	0.000273202	10.63	0.000273202
10.27	7.65847e-06	10.27	6.96224e-06		10.46	1.50915e-05	10.46	1.50915e-05		10.74	3.67454e-05	10.74	3.67454e-05		10.74	0.000100094	10.74	0.000100094		10.74	0.000275316	10.74	0.000275316
10.37	7.68192e-06	10.37	6.98356e-06		10.57	1.51009e-05	10.57	1.51009e-05		10.85	3.72464e-05	10.85	3.72464e-05		10.85	0.000100702	10.85	0.000100702		10.85	0.000277497	10.85	0.000277497
10.47	7.67162e-06	10.47	6.9742e-06		10.67	1.512e-05	10.67	1.512e-05		10.96	3.72969e-05	10.96	3.72969e-05		10.96	0.000101461	10.96	0.000101461		10.96	0.000279947	10.96	0.000279947
10.57	7.70782e-06	10.57	7.00711e-06		10.78	1.526e-05	10.78	1.526e-05		11.07	3.75408e-05	11.07	3.75408e-05		11.07	0.00010245	11.07	0.00010245		11.07	0.000282175	11.07	0.000282175
10.67	7.70049e-06	10.67	7.00045e-06		10.89	1.52468e-05	10.89	1.52468e-05		11.18	3.77066e-05	11.18	3.77066e-05		11.18	0.000102694	11.18	0.000102694		11.18	0.00028435	11.18	0.00028435
10.77	7.72822e-06	10.77	7.02566e-06		10.99	1.5264e-05	10.99	1.5264e-05		11.29	3.80126e-05	11.29	3.80126e-05		11.29	0.000103678	11.29	0.000103678		11.29	0.000286731	11.29	0.000286731
10.87	7.72265e-06	10.87	7.02059e-06		11.1	1.52296e-05	11.1	1.52296e-05		11.4	3.83169e-05	11.4	3.83169e-05		11.4	0.000104411	11.4	0.000104411		11.4	0.00028914	11.4	0.00028914
10.98	7.72987e-06	10.98	7.02715e-06		11.2	1.53535e-05	11.2	1.53535e-05		11.51	3.83174e-05	11.51	3.83174e-05		11.51	0.000104767	11.51	0.000104767		11.51	0.000291296	11.51	0.000291296
11.08	7.75958e-06	11.08	7.05416e-06		11.31	1.5367e-05	11.31	1.5367e-05		11.63	3.88411e-05	11.63	3.88411e-05		11.63	0.000105501	11.63	0.000105501		11.63	0.000293538	11.63	0.000293538
11.18	7.78444e-06	11.18	7.07676e-06		11.41	1.54196e-05	11.41	1.54196e-05		11.74	3.8965e-05	11.74	3.8965e-05		11.74	0.000106139	11.74	0.000106139		11.74	0.000295953	11.74	0.000295953
11.28	7.79025e-06	11.28	7.08204e-06		11.52	1.54442e-05	11.52	1.54442e-05		11.85	3.90175e-05	11.85	3.90175e-05		11.85	0.000106722	11.85	0.000106722		11.85	0.00029813	11.85	0.00029813
11.38	7.77831e-06	11.38	7.07119e-06		11.62	1.55616e-05	11.62	1.55616e-05		11.96	3.94518e-05	11.96	3.94518e-05		11.96	0.000107331	11.96	0.000107331		11.96	0.000300215	11.96	0.000300215
11.48	7.82045e-06	11.48	7.1095e-06		11.73	1.55639e-05	11.73	1.55639e-05		12.07	3.94872e-05	12.07	3.94872e-05		12.07	0.000107717	12.07	0.000107717		12.07	0.000302536	12.07	0.000302536
11.58	7.83411e-06	11.58	7.12192e-06		11.84	1.55609e-05	11.84	1.55609e-05		12.19	3.97765e-05	12.19	3.97765e-05		12.19	0.000108885	12.19	0.000108885		12.19	0.000304777	12.19	0.000304777
11.69	7.81819e-06	11.69	7.10744e-06		11.94	1.56149e-05	11.94	1.56149e-05		12.3	3.99418e-05	12.3	3.99418e-05		12.3	0.000109354	12.3	0.000109354		12.3	0.000306805	12.3	0.000306805
11.79	7.83298e-06	11.79	7.12089e-06		12.05	1.57331e-05	12.05	1.57331e-05		12.41	4.01225e-05	12.41	4.01225e-05		12.41	0.000109768	12.41	0.000109768		12.41	0.000308925	12.41	0.000308925
11.89	7.8587e-06	11.89	7.14428e-06		12.15	1.57458e-05	12.15	1.57458e-05		12.52	4.05239e-05	12.52	4.05239e-05		12.52	0.000110852	12.52	0.000110852		12.52	0.000311194	12.52	0.000311194
11.99	7.85913e-06	11.99	7.14466e-06		12.26	1.57381e-05	12.26	1.57381e-05		12.64	4.06071e-05	12.64	4.06071e-05		12.64	0.000111443	12.64	0.000111443		12.64	0.000313412	12.64	0.000313412
12.09	7.86594e-06	12.09	7.15085e-06		12.37	1.58307e-05	12.37	1.58307e-05		12.75	4.0606e-05	12.75	4.0606e-05		12.75	0.000111656	12.75	0.000111656		12.75	0.000315441	12.75	0.000315441
12.19	7.89287e-06	12.19	7.17534e-06		12.47	1.58639e-05	12.47	1.58639e-05		12.86	4.09537e-05	12.86	4.09537e-05		12.86	0.000112486	12.86	0.000112486		12.86	0.000317561	12.86	0.000317561
12.29	7.91876e-06	12.29	7.19887e-06		12.58	1.5884e-05	12.58	1.5884e-05		12.97	4.10782e-05	12.97	4.10782e-05		12.97	0.000113134	12.97	0.000113134		12.97	0.00031986	12.97	0.00031986
12.4	7.91837e-06	12.4	7.19851e-06		12.69	1.58813e-05	12.69	1.58813e-05		13.09	4.11007e-05	13.09	4.11007e-05		13.09	0.000113875	13.09	0.000113875		13.09	0.000322017	13.09	0.000322017
12.5	7.92937e-06	12.5	7.20852e-06		12.79	1.60005e-05	12.79	1.60005e-05		13.2	4.14363e-05	13.2	4.14363e-05		13.2	0.000114548	13.2	0.000114548		13.2	0.000324034	13.2	0.000324034
12.6	7.95893e-06	12.6	7.23539e-06		12.9	1.6011e-05	12.9	1.6011e-05		13.31	4.17665e-05	13.31	4.17665e-05		13.31	0.000115181	13.31	0.000115181		13.31	0.000326209	13.31	0.000326209
12.7	7.98793e-06	12.7	7.26176e-06		13.01	1.60514e-05	13.01	1.60514e-05		13.43	4.18205e-05	13.43	4.18205e-05		13.43	0.000115706	13.43	0.000115706		13.43	0.000328481	13.43	0.000328481
12.8	7.99912e-06	12.8	7.27192e-06		13.11	1.61627e-05	13.11	1.61627e-05		13.54	4.19201e-05	13.54	4.19201e-05		13.54	0.000116535	13.54	0.000116535		13.54	0.000330602	13.54	0.000330602
12.9	8.02981e-06	12.9	7.29982e-06		13.22	1.62152e-05	13.22	1.62152e-05		13.65	4.22565e-05	13.65	4.22565e-05		13.65	0.000117268	13.65	0.000117268		13.65	0.000332582	13.65	0.000332582
13.01	8.03901e-06	13.01	7.30819e-06		13.32	1.62742e-05	13.32	1.62742e-05		13.77	4.24062e-05	13.77	4.24062e-05		13.77	0.00011744	13.77	0.00011744		13.77	0.000334695	13.77	0.000334695
13.11	8.04073e-06	13.11	7.30975e-06		13.43	1.63735e-05	13.43	1.63735e-05		13.88	4.25246e-05	13.88	4.25246e-05		13.88	0.000118015	13.88	0.000118015		13.88	0.000336921	13.88	0.000336921
13.21	8.05961e-06	13.21	7.32692e-06		13.54	1.64546e-05	13.54	1.64546e-05		14	4.2787e-05	14	4.2787e-05		14	0.000119265	14	0.000119265		13.99	0.000339088	13.99	0.000339088
13.31	8.11493e-06	13.31	7.37721e-06		13.65	1.64933e-05	13.65	1.64933e-05		14.11	4.30901e-05	14.11	4.30901e-05		14.11	0.000119981	14.11	0.000119981		14.11	0.000341148	14.11	0.000341148
13.41	8.13431e-06	13.41	7.39483e-06		13.75	1.65876e-05	13.75	1.65876e-05		14.22	4.31791e-05	14.22	4.31791e-05		14.22	0.000120305	14.22	0.000120305		14.22	0.000343202	14.22	0.000343202
13.51	8.13049e-06	13.51	7.39136e-06		13.86	1.67002e-05	13.86	1.67002e-05		14.34	4.33038e-05	14.34	4.33038e-05		14.34	0.00012054	14.34	0.00012054		14.34	0.000345377	14.34	0.000345377
13.62	8.16186e-06	13.62	7.41987e-06		13.97	1.67521e-05	13.97	1.67521e-05		14.45	4.34404e-05	14.45	4.34404e-05		14.45	0.000121438	14.45	0.000121438		14.45	0.000347651	14.45	0.000347651
13.72	8.18343e-06	13.72	7.43949e-06		14.07	1.67333e-05	14.07	1.67333e-05		14.57	4.38479e-05	14.57	4.38479e-05		14.57	0.000122781	14.57	0.000122781		14.57	0.000349802	14.57	0.000349802
13.82	8.19615e-06	13.82	7.45105e-06		14.18	1.67605e-05	14.18	1.67605e-05		14.68	4.40982e-05	14.68	4.40982e-05		14.68	0.000123595	14.68	0.000123595		14.68	0.000351911	14.68	0.000351911
13.92	8.18236e-06	13.92	7.43851e-06		14.29	1.67957e-05	14.29	1.67957e-05		14.8	4.40592e-05	14.8	4.40592e-05		14.8	0.000124004	14.8	0.000124004		14.8	0.00035406	14.8	0.00035406
14.02	8.21982e-06	14.02	7.47257e-06		14.39	1.67799e-05	14.39	1.67799e-05		14.91	4.40544e-05	14.91	4.40544e-05		14.91	0.000124067	14.91	0.000124067		14.91	0.00035631	14.91	0.00035631
14.12	8.23882e-06	14.12	7.48984e-06		14.5	1.68642e-05	14.5	1.68642e-05		15.03	4.41902e-05	15.03	4.41902e-05		15.03	0.000125082	15.03	0.000125082		15.03	0.000358609	15.03	0.000358609
14.23	8.28904e-06	14.23	7.53549e-06		14.61	1.67765e-05	14.61	1.67765e-05		15.14	4.45134e-05	15.14	4.45134e-05		15.14	0.000126212	15.14	0.000126212		15.14	0.000360764	15.14	0.000360764
14.33	8.26195e-06	14.33	7.51086e-06		14.72	1.68544e-05	14.72	1.68544e-05		15.26	4.47392e-05	15.26	4.47392e-05		15.26	0.000127067	15.26	0.000127067		15.26	0.000362869	15.26	0.000362869
14.43	8.30414e-06	14.43	7.54922e-06		14.82	1.69051e-05	14.82	1.69051e-05		15.37	4.47802e-05	15.37	4.47802e-05		15.37	0.000127239	15.37	0.000127239		15.37	0.000365018	15.37	0.000365018
14.53	8.30958e-06	14.53	7.55416e-06		14.93	1.68831e-05	14.93	1.68831e-05		15.49	4.48065e-05	15.49	4.48065e-05		15.49	0.000127576	15.49	0.000127576		15.49	0.000367254	15.49	0.000367254
14.63	8.3346e-06	14.63	7.57691e-06		15.04	1.69778e-05	15.04	1.69778e-05		15.6	4.49321e-05	15.6	4.49321e-05		15.6	0.000128445	15.6	0.000128445		15.6	0.000369525	15.6	0.000369525
14.73	8.30607e-06	14.73	7.55097e-06		15.15	1.70506e-05	15.15	1.70506e-05		15.72	4.52414e-05	15.72	4.52414e-05		15.72	0.000129372	15.72	0.000129372		15.72	0.000371771	15.72	0.000371771
14.84	8.33572e-06	14.84	7.57793e-06		15.25	1.70262e-05	15.25	1.70262e-05		15.83	4.55659e-05	15.83	4.55659e-05		15.83	0.000130281	15.83	0.000130281		15.83	0.000373881	15.83	0.000373881
14.94	8.33303e-06	14.94	7.57548e-06		15.36	1.71325e-05	15.36	1.71325e-05		15.95	4.57622e-05	15.95	4.57622e-05		15.95	0.000130888	15.95	0.000130888		15.95	0.000376036	15.95	0.000376036
15.04	8.32782e-06	15.04	7.57075e-06		15.47	1.71014e-05	15.47	1.71014e-05		16.07	4.59074e-05	16.07	4.59074e-05		16.07	0.00013155	16.07	0.00013155		16.07	0.000378274	16.07	0.000378274
15.14	8.30847e-06	15.14	7.55316e-06		15.58	1.71756e-05	15.58	1.71756e-05		16.18	4.59662e-05	16.18	4.59662e-05		16.18	0.000132063	16.18	0.000132063		16.18	0.000380566	16.18	0.000380566
15.24	8.37968e-06	15.24	7.61789e-06		15.68	1.72104e-05	15.68	1.72104e-05		16.3	4.6089e-05	16.3	4.6089e-05		16.3	0.000132458	16.3	0.000132458		16.3	0.000382721	16.3	0.000382721
15.35	8.36814e-06	15.35	7.6074e-06		15.79	1.71521e-05	15.79	1.71521e-05		16.41	4.62974e-05	16.41	4.62974e-05		16.41	0.000133116	16.41	0.000133116		16.41	0.000384834	16.41	0.000384834
15.45	8.41864e-06	15.45	7.6533e-06		15.9	1.72477e-05	15.9	1.72477e-05		16.53	4.66033e-05	16.53	4.66033e-05		16.53	0.000133863	16.53	0.000133863		16.53	0.000386892	16.53	0.000386892
15.55	8.41734e-06	15.55	7.65213e-06		16.01	1.72367e-05	16.01	1.72367e-05		16.65	4.68798e-05	16.65	4.68798e-05		16.65	0.000134861	16.65	0.000134861		16.65	0.000389004	16.65	0.000389004
15.65	8.4623e-06	15.65	7.693e-06		16.12	1.72546e-05	16.12	1.72546e-05		16.76	4.71113e-05	16.76	4.71113e-05		16.76	0.000135379	16.76	0.000135379		16.76	0.000391204	16.76	0.000391204
15.75	8.50291e-06	15.75	7.72992e-06		16.22	1.73083e-05	16.22	1.73083e-05		16.88	4.72178e-05	16.88	4.72178e-05		16.88	0.000135844	16.88	0.000135844		16.88	0.000393414	16.88	0.000393414
15.86	8.50664e-06	15.86	7.73331e-06		16.33	1.73238e-05	16.33	1.73238e-05		17	4.73905e-05	17	4.73905e-05		17	0.000136493	17	0.000136493		17	0.000395648	17	0.000395648
15.96	8.49978e-06	15.96	7.72707e-06		16.44	1.73869e-05	16.44	1.73869e-05		17.12	4.7562e-05	17.12	4.7562e-05		17.12	0.00013737	17.12	0.00013737		17.12	0.000397782	17.12	0.000397782
16.06	8.54983e-06	16.06	7.77258e-06		16.55	1.73869e-05	16.55	1.73869e-05		17.23	4.77553e-05	17.23	4.77553e-05		17.23	0.000138008	17.23	0.000138008		17.23	0.000399891	17.23	0.000399891
16.16	8.54943e-06	16.16	7.7722e-06		16.66	1.73967e-05	16.66	1.73967e-05		17.35	4.79364e-05	17.35	4.79364e-05		17.35	0.000138871	17.35	0.000138871		17.35	0.000401976	17.35	0.000401976
16.26	8.54868e-06	16.26	7.77153e-06		16.77	1.74467e-05	16.77	1.74467e-05		17.47	4.80975e-05	17.47	4.80975e-05		17.47	0.000139495	17.47	0.000139495		17.47	0.000404074	17.47	0.000404074
16.37	8.52602e-06	16.37	7.75093e-06		16.87	1.74751e-05	16.87	1.74751e-05		17.59	4.81261e-05	17.59	4.81261e-05		17.59	0.000139869	17.59	0.000139869		17.59	0.000406242	17.59	0.000406242
16.47	8.53865e-06	16.47	7.76241e-06		16.98	1.75632e-05	16.98	1.75632e-05		17.7	4.82173e-05	17.7	4.82173e-05		17.7	0.000140195	17.7	0.000140195		17.7	0.000408418	17.7	0.000408418
16.57	8.53908e-06	16.57	7.7628e-06		17.09	1.75454e-05	17.09	1.75454e-05		17.82	4.84623e-05	17.82	4.84623e-05		17.82	0.000141124	17.82	0.000141124		17.82	0.000410629	17.82	0.000410629
16.67	8.56114e-06	16.67	7.78285e-06		17.2	1.76285e-05	17.2	1.76285e-05		17.94	4.86057e-05	17.94	4.86057e-05		17.94	0.000141367	17.94	0.000141367		17.94	0.000412807	17.94	0.000412807
16.77	8.54539e-06	16.77	7.76854e-06		17.31	1.76391e-05	17.31	1.76391e-05		18.06	4.87909e-05	18.06	4.87909e-05		18.06	0.00014205	18.06	0.00014205		18.06	0.000414806	18.06	0.000414806
16.88	8.58378e-06	16.88	7.80344e-06		17.42	1.7643e-05	17.42	1.7643e-05		18.17	4.89937e-05	18.17	4.89937e-05		18.17	0.000142936	18.17	0.000142936		18.17	0.000416836	18.17	0.000416836
16.98	8.58592e-06	16.98	7.80538e-06		17.53	1.77104e-05	17.53	1.77104e-05		18.29	4.9153e-05	18.29	4.9153e-05		18.29	0.000143607	18.29	0.000143607		18.29	0.000418899	18.29	0.000418899
17.08	8.61403e-06	17.08	7.83094e-06		17.63	1.76753e-05	17.63	1.76753e-05		18.41	4.93241e-05	18.41	4.93241e-05		18.41	0.000144143	18.41	0.000144143		18.41	0.000420981	18.41	0.000420981
17.18	8.62689e-06	17.18	7.84263e-06		17.74	1.7753e-05	17.74	1.7753e-05		18.53	4.94598e-05	18.53	4.94598e-05		18.53	0.000144811	18.53	0.000144811		18.53	0.000423075	18.53	0.000423075
17.28	8.64966e-06	17.28	7.86332e-06		17.85	1.76909e-05	17.85	1.76909e-05		18.65	4.9725e-05	18.65	4.9725e-05		18.65	0.000145386	18.65	0.000145386		18.65	0.00042523	18.65	0.00042523
17.39	8.65832e-06	17.39	7.8712e-06		17.96	1.77429e-05	17.96	1.77429e-05		18.77	4.98746e-05	18.77	4.98746e-05		18.77	0.000145899	18.77	0.000145899		18.77	0.00042734	18.77	0.00042734
17.49	8.64845e-06	17.49	7.86223e-06		18.07	1.7725e-05	18.07	1.7725e-05		18.89	5.02103e-05	18.89	5.02103e-05		18.89	0.000146614	18.89	0.000146614		18.89	0.000429496	18.89	0.000429496
17.59	8.64796e-06	17.59	7.86178e-06		18.18	1.77296e-05	18.18	1.77296e-05		19.01	5.03791e-05	19.01	5.03791e-05		19.01	0.00014725	19.01	0.00014725		19	0.000431578	19	0.000431578
17.69	8.68716e-06	17.69	7.89742e-06		18.29	1.77811e-05	18.29	1.77811e-05		19.12	5.05301e-05	19.12	5.05301e-05		19.12	0.000147793	19.12	0.000147793		19.12	0.000433667	19.12	0.000433667
17.8	8.69239e-06	17.8	7.90218e-06		18.4	1.77501e-05	18.4	1.77501e-05		19.24	5.08314e-05	19.24	5.08314e-05		19.24	0.000148588	19.24	0.000148588		19.24	0.000435726	19.24	0.000435726
17.9	8.69009e-06	17.9	7.90008e-06		18.51	1.78264e-05	18.51	1.78264e-05		19.36	5.09799e-05	19.36	5.09799e-05		19.36	0.000149136	19.36	0.000149136		19.36	0.000437743	19.36	0.000437743
18	8.6897e-06	18	7.89972e-06		18.62	1.78225e-05	18.62	1.78225e-05		19.48	5.10604e-05	19.48	5.10604e-05		19.48	0.000149729	19.48	0.000149729		19.48	0.000439858	19.48	0.000439858
18.1	8.70621e-06	18.1	7.91474e-06		18.73	1.78753e-05	18.73	1.78753e-05		19.6	5.13465e-05	19.6	5.13465e-05		19.6	0.000150364	19.6	0.000150364		19.6	0.000442023	19.6	0.000442023
18.2	8.69726e-06	18.2	7.9066e-06		18.84	1.78244e-05	18.84	1.78244e-05		19.72	5.14256e-05	19.72	5.14256e-05		19.72	0.000150658	19.72	0.000150658		19.72	0.000444191	19.72	0.000444191
18.31	8.71095e-06	18.31	7.91905e-06		18.94	1.79064e-05	18.94	1.79064e-05		19.84	5.15848e-05	19.84	5.15848e-05		19.84	0.000151308	19.84	0.000151308		19.84	0.000446322	19.84	0.000446322
18.41	8.67747e-06	18.41	7.88861e-06		19.05	1.78576e-05	19.05	1.78576e-05		19.96	5.17268e-05	19.96	5.17268e-05		19.96	0.000151814	19.96	0.000151814		19.96	0.000448438	19.96	0.000448438
18.51	8.68762e-06	18.51	7.89783e-06		19.16	1.79546e-05	19.16	1.79546e-05		20.08	5.1852e-05	20.08	5.1852e-05		20.08	0.000152293	20.08	0.000152293		20.08	0.000450537	20.08	0.000450537
18.61	8.70182e-06	18.61	7.91074e-06		19.27	1.78844e-05	19.27	1.78844e-05		20.2	5.20696e-05	20.2	5.20696e-05		20.2	0.00015316	20.2	0.00015316		20.2	0.000452735	20.2	0.000452735
18.72	8.71511e-06	18.72	7.92282e-06		19.38	1.79661e-05	19.38	1.79661e-05		20.32	5.225e-05	20.32	5.225e-05		20.32	0.000153716	20.32	0.000153716		20.32	0.000454927	20.32	0.000454927
18.82	8.6809e-06	18.82	7.89173e-06		19.49	1.79695e-05	19.49	1.79695e-05		20.44	5.25143e-05	20.44	5.25143e-05		20.44	0.000154428	20.44	0.000154428		20.44	0.000457073	20.44	0.000457073
18.92	8.71972e-06	18.92	7.92702e-06		19.6	1.79861e-05	19.6	1.79861e-05		20.56	5.26428e-05	20.56	5.26428e-05		20.56	0.000155053	20.56	0.000155053		20.56	0.000459187	20.56	0.000459187
19.02	8.7157e-06	19.02	7.92336e-06		19.71	1.78963e-05	19.71	1.78963e-05		20.68	5.27497e-05	20.68	5.27497e-05		20.68	0.000155598	20.68	0.000155598		20.68	0.000461266	20.68	0.000461266
19.13	8.7292e-06	19.13	7.93564e-06		19.82	1.80006e-05	19.82	1.80006e-05		20.8	5.28531e-05	20.8	5.28531e-05		20.8	0.000156279	20.8	0.000156279		20.8	0.000463421	20.8	0.000463421
19.23	8.73906e-06	19.23	7.9446e-06		19.93	1.7877e-05	19.93	1.7877e-05		20.93	5.28433e-05	20.93	5.28433e-05		20.93	0.00015684	20.93	0.00015684		20.93	0.000465583	20.93	0.000465583
19.33	8.76039e-06	19.33	7.96399e-06		20.04	1.79668e-05	20.04	1.79668e-05		21.05	5.29044e-05	21.05	5.29044e-05		21.05	0.000157779	21.05	0.000157779		21.05	0.000467706	21.05	0.000467706
19.43	8.74712e-06	19.43	7.95193e-06		20.15	1.78844e-05	20.15	1.78844e-05		21.17	5.29867e-05	21.17	5.29867e-05		21.17	0.000158418	21.17	0.000158418		21.17	0.000469836	21.17	0.000469836
19.54	8.75584e-06	19.54	7.95986e-06		20.26	1.7996e-05	20.26	1.7996e-05		21.29	5.31902e-05	21.29	5.31902e-05		21.29	0.000159056	21.29	0.000159056		21.29	0.000471937	21.29	0.000471937
19.64	8.75501e-06	19.64	7.9591e-06		20.37	1.79766e-05	20.37	1.79766e-05		21.41	5.32479e-05	21.41	5.32479e-05		21.41	0.000159356	21.41	0.000159356		21.41	0.000474075	21.41	0.000474075
19.74	8.75929e-06	19.74	7.96299e-06		20.48	1.80162e-05	20.48	1.80162e-05		21.53	5.32893e-05	21.53	5.32893e-05		21.53	0.000160083	21.53	0.000160083		21.53	0.000476186	21.53	0.000476186
19.84	8.73798e-06	19.84	7.94362e-06		20.59	1.7997e-05	20.59	1.7997e-05		21.65	5.32785e-05	21.65	5.32785e-05		21.65	0.000160686	21.65	0.000160686		21.65	0.000478251	21.65	0.000478251
19.95	8.74604e-06	19.95	7.95095e-06		20.7	1.80957e-05	20.7	1.80957e-05		21.78	5.33831e-05	21.78	5.33831e-05		21.78	0.000161329	21.78	0.000161329		21.77	0.000480274	21.77	0.000480274
20.05	8.71776e-06	20.05	7.92523e-06		20.81	1.80426e-05	20.81	1.80426e-05		21.9	5.36561e-05	21.9	5.36561e-05		21.9	0.000161814	21.9	0.000161814		21.9	0.000482342	21.9	0.000482342
20.15	8.72069e-06	20.15	7.9279e-06		20.92	1.80899e-05	20.92	1.80899e-05		22.02	5.37137e-05	22.02	5.37137e-05		22.02	0.000162024	22.02	0.000162024		22.02	0.000484364	22.02	0.000484364
20.25	8.73508e-06	20.25	7.94098e-06		21.03	1.8124e-05	21.03	1.8124e-05		22.14	5.37958e-05	22.14	5.37958e-05		22.14	0.000162901	22.14	0.000162901		22.14	0.000486414	22.14	0.000486414
20.36	8.75561e-06	20.36	7.95965e-06		21.15	1.81047e-05	21.15	1.81047e-05		22.26	5.37942e-05	22.26	5.37942e-05		22.26	0.000163582	22.26	0.000163582		22.26	0.000488443	22.26	0.000488443
20.46	8.7334e-06	20.46	7.93945e-06		21.26	1.82109e-05	21.26	1.82109e-05		22.39	5.4224e-05	22.39	5.4224e-05		22.39	0.000164358	22.39	0.000164358		22.39	0.000490511	22.39	0.000490511
20.56	8.74545e-06	20.56	7.95041e-06		21.37	1.81838e-05	21.37	1.81838e-05		22.51	5.44424e-05	22.51	5.44424e-05		22.51	0.000164505	22.51	0.000164505		22.51	0.000492576	22.51	0.000492576
20.66	8.73702e-06	20.66	7.94274e-06		21.48	1.82522e-05	21.48	1.82522e-05		22.63	5.45437e-05	22.63	5.45437e-05		22.63	0.000165465	22.63	0.000165465		22.63	0.00049463	22.63	0.00049463
20.77	8.75456e-06	20.77	7.95869e-06		21.59	1.8228e-05	21.59	1.8228e-05		22.75	5.46027e-05	22.75	5.46027e-05		22.75	0.000166255	22.75	0.000166255		22.75	0.000496721	22.75	0.000496721
20.87	8.72467e-06	20.87	7.93152e-06		21.7	1.83416e-05	21.7	1.83416e-05		22.88	5.49938e-05	22.88	5.49938e-05		22.88	0.000166905	22.88	0.000166905		22.88	0.000498771	22.88	0.000498771
20.97	8.68613e-06	20.97	7.89649e-06		21.81	1.82605e-05	21.81	1.82605e-05		23	5.50836e-05	23	5.50836e-05		23	0.000167189	23	0.000167189		23	0.000500843	23	0.000500843
21.07	8.70337e-06	21.07	7.91216e-06		21.92	1.83268e-05	21.92	1.83268e-05		23.12	5.52316e-05	23.12	5.52316e-05		23.12	0.000168209	23.12	0.000168209		23.12	0.000502934	23.12	0.000502934
21.18	8.70504e-06	21.18	7.91368e-06		22.03	1.83723e-05	22.03	1.83723e-05		23.25	5.52961e-05	23.25	5.52961e-05		23.25	0.000168484	23.25	0.000168484		23.24	0.000505021	23.24	0.000505021
21.28	8.68169e-06	21.28	7.89244e-06		22.14	1.82801e-05	22.14	1.82801e-05		23.37	5.57025e-05	23.37	5.57025e-05		23.37	0.000168928	23.37	0.000168928		23.37	0.000507091	23.37	0.000507091
21.38	8.71142e-06	21.38	7.91948e-06		22.25	1.84143e-05	22.25	1.84143e-05		23.49	5.56263e-05	23.49	5.56263e-05		23.49	0.000169491	23.49	0.000169491		23.49	0.00050919	23.49	0.00050919
21.48	8.70692e-06	21.48	7.91538e-06		22.37	1.83581e-05	22.37	1.83581e-05		23.62	5.57902e-05	23.62	5.57902e-05		23.62	0.000170338	23.62	0.000170338		23.62	0.000511381	23.62	0.000511381
21.59	8.74533e-06	21.59	7.9503e-06		22.48	1.84206e-05	22.48	1.84206e-05		23.74	5.60286e-05	23.74	5.60286e-05		23.74	0.000170686	23.74	0.000170686		23.74	0.000513541	23.74	0.000513541
21.69	8.7253e-06	21.69	7.93209e-06		22.59	1.84278e-05	22.59	1.84278e-05		23.86	5.62442e-05	23.86	5.62442e-05		23.86	0.000171354	23.86	0.000171354		23.86	0.000515651	23.86	0.000515651
21.79	8.75042e-06	21.79	7.95493e-06		22.7	1.84013e-05	22.7	1.84013e-05		23.99	5.62078e-05	23.99	5.62078e-05		23.99	0.000171985	23.99	0.000171985		23.99	0.000517804	23.99	0.000517804
21.9	8.74994e-06	21.9	7.95449e-06		22.81	1.84888e-05	22.81	1.84888e-05		24.11	5.64973e-05	24.11	5.64973e-05		24.11	0.000172401	24.11	0.000172401		24.11	0.000519939	24.11	0.000519939
22	8.77857e-06	22	7.98052e-06		22.92	1.84689e-05	22.92	1.84689e-05		24.24	5.6589e-05	24.24	5.6589e-05		24.24	0.000173079	24.24	0.000173079		24.24	0.000522025	24.24	0.000522025
22.1	8.79469e-06	22.1	7.99517e-06		23.03	1.85789e-05	23.03	1.85789e-05		24.36	5.67042e-05	24.36	5.67042e-05		24.36	0.000173769	24.36	0.000173769		24.36	0.000524174	24.36	0.000524174
22.2	8.82103e-06	22.2	8.01912e-06		23.15	1.8537e-05	23.15	1.8537e-05		24.49	5.70745e-05	24.49	5.70745e-05		24.49	0.000174164	24.49	0.000174164		24.48	0.000526227	24.48	0.000526227
22.31	8.82055e-06	22.31	8.01868e-06		23.26	1.85994e-05	23.26	1.85994e-05		24.61	5.71071e-05	24.61	5.71071e-05		24.61	0.000174769	24.61	0.000174769		24.61	0.000528309	24.61	0.000528309
22.41	8.83903e-06	22.41	8.03548e-06		23.37	1.8662e-05	23.37	1.8662e-05		24.73	5.73974e-05	24.73	5.73974e-05		24.73	0.00017525	24.73	0.00017525		24.73	0.000530375	24.73	0.000530375
22.51	8.8599e-06	22.51	8.05445e-06		23.48	1.86124e-05	23.48	1.86124e-05		24.86	5.76073e-05	24.86	5.76073e-05		24.86	0.000175499	24.86	0.000175499		24.86	0.000532449	24.86	0.000532449
22.61	8.86528e-06	22.61	8.05935e-06		23.59	1.87399e-05	23.59	1.87399e-05		24.98	5.76908e-05	24.98	5.76908e-05		24.98	0.000176479	24.98	0.000176479		24.98	0.000534552	24.98	0.000534552
22.72	8.88024e-06	22.72	8.07295e-06		23.7	1.87709e-05	23.7	1.87709e-05		25.11	5.78912e-05	25.11	5.78912e-05		25.11	0.000176368	25.11	0.000176368		25.11	0.000536612	25.11	0.000536612
22.82	8.87442e-06	22.82	8.06766e-06		23.82	1.87538e-05	23.82	1.87538e-05		25.23	5.79102e-05	25.23	5.79102e-05		25.23	0.000177296	25.23	0.000177296		25.23	0.000538745	25.23	0.000538745
22.92	8.91617e-06	22.92	8.10561e-06		23.93	1.88574e-05	23.93	1.88574e-05		25.36	5.81777e-05	25.36	5.81777e-05		25.36	0.000177501	25.36	0.000177501		25.36	0.000540842	25.36	0.000540842
23.03	8.92775e-06	23.03	8.11614e-06		24.04	1.88567e-05	24.04	1.88567e-05		25.49	5.82694e-05	25.49	5.82694e-05		25.49	0.000177985	25.49	0.000177985		25.48	0.000542895	25.48	0.000542895
23.13	8.97107e-06	23.13	8.15552e-06		24.15	1.88749e-05	24.15	1.88749e-05		25.61	5.83142e-05	25.61	5.83142e-05		25.61	0.000178739	25.61	0.000178739		25.61	0.000545087	25.61	0.000545087
23.23	9.01754e-06	23.23	8.19776e-06		24.26	1.90136e-05	24.26	1.90136e-05		25.74	5.85065e-05	25.74	5.85065e-05		25.74	0.000179072	25.74	0.000179072		25.74	0.000547252	25.74	0.000547252
23.33	9.05796e-06	23.33	8.23451e-06		24.38	1.90051e-05	24.38	1.90051e-05		25.86	5.84524e-05	25.86	5.84524e-05		25.86	0.000180049	25.86	0.000180049		25.86	0.000549465	25.86	0.000549465
23.44	9.08763e-06	23.44	8.26149e-06		24.49	1.90679e-05	24.49	1.90679e-05		25.99	5.87534e-05	25.99	5.87534e-05		25.99	0.000180419	25.99	0.000180419		25.99	0.000551671	25.99	0.000551671
23.54	9.14389e-06	23.54	8.31263e-06		24.6	1.90749e-05	24.6	1.90749e-05		26.11	5.85981e-05	26.11	5.85981e-05		26.11	0.000181324	26.11	0.000181324		26.11	0.000553889	26.11	0.000553889
23.64	9.13388e-06	23.64	8.30352e-06		24.71	1.90919e-05	24.71	1.90919e-05		26.24	5.90035e-05	26.24	5.90035e-05		26.24	0.000181913	26.24	0.000181913		26.24	0.00055617	26.24	0.00055617
23.75	9.12509e-06	23.75	8.29554e-06		24.83	1.91677e-05	24.83	1.91677e-05		26.37	5.8899e-05	26.37	5.8899e-05		26.37	0.000182826	26.37	0.000182826		26.37	0.000558364	26.37	0.000558364
23.85	9.11364e-06	23.85	8.28513e-06		24.94	1.92023e-05	24.94	1.92023e-05		26.49	5.91908e-05	26.49	5.91908e-05		26.49	0.000183007	26.49	0.000183007		26.49	0.000560614	26.49	0.000560614
23.95	9.0554e-06	23.95	8.23218e-06		25.05	1.92231e-05	25.05	1.92231e-05		26.62	5.9313e-05	26.62	5.9313e-05		26.62	0.00018409	26.62	0.00018409		26.62	0.000562799	26.62	0.000562799
24.06	9.03386e-06	24.06	8.2126e-06		25.16	1.93629e-05	25.16	1.93629e-05		26.75	5.96821e-05	26.75	5.96821e-05		26.75	0.000184196	26.75	0.000184196		26.75	0.000565	26.75	0.000565
24.16	9.05608e-06	24.16	8.2328e-06		25.28	1.93529e-05	25.28	1.93529e-05		26.87	5.97844e-05	26.87	5.97844e-05		26.87	0.000185252	26.87	0.000185252		26.87	0.000567183	26.87	0.000567183
24.26	9.02356e-06	24.26	8.20323e-06		25.39	1.93812e-05	25.39	1.93812e-05		27	6.02777e-05	27	6.02777e-05		27	0.000185598	27	0.000185598		27	0.000569393	27	0.000569393
24.36	9.04225e-06	24.36	8.22023e-06		25.5	1.95047e-05	25.5	1.95047e-05		27.13	6.02122e-05	27.13	6.02122e-05		27.13	0.000186267	27.13	0.000186267		27.13	0.000571622	27.13	0.000571622
24.47	9.06613e-06	24.47	8.24194e-06		25.61	1.94978e-05	25.61	1.94978e-05		27.26	6.06592e-05	27.26	6.06592e-05		27.26	0.000186726	27.26	0.000186726		27.25	0.000573883	27.25	0.000573883
24.57	9.07625e-06	24.57	8.25114e-06		25.73	1.94945e-05	25.73	1.94945e-05		27.38	6.06291e-05	27.38	6.06291e-05		27.38	0.000187855	27.38	0.000187855		27.38	0.000576241	27.38	0.000576241
24.67	9.06468e-06	24.67	8.24062e-06		25.84	1.96045e-05	25.84	1.96045e-05		27.51	6.09244e-05	27.51	6.09244e-05		27.51	0.000188246	27.51	0.000188246		27.51	0.000578532	27.51	0.000578532
24.78	9.04173e-06	24.78	8.21975e-06		25.95	1.96689e-05	25.95	1.96689e-05		27.64	6.08968e-05	27.64	6.08968e-05		27.64	0.000189372	27.64	0.000189372		27.64	0.000580871	27.64	0.000580871
24.88	9.07586e-06	24.88	8.25078e-06		26.07	1.96361e-05	26.07	1.96361e-05		27.77	6.12307e-05	27.77	6.12307e-05		27.77	0.000190325	27.77	0.000190325		27.77	0.000583133	27.77	0.000583133
24.98	9.06379e-06	24.98	8.23981e-06		26.18	1.97979e-05	26.18	1.97979e-05		27.89	6.12347e-05	27.89	6.12347e-05		27.89	0.000190736	27.89	0.000190736		27.89	0.000585358	27.89	0.000585358
25.09	9.04234e-06	25.09	8.22031e-06		26.29	1.99256e-05	26.29	1.99256e-05		28.02	6.14634e-05	28.02	6.14634e-05		28.02	0.000191741	28.02	0.000191741		28.02	0.000587526	28.02	0.000587526
25.19	9.06353e-06	25.19	8.23957e-06		26.41	1.99418e-05	26.41	1.99418e-05		28.15	6.18516e-05	28.15	6.18516e-05		28.15	0.000192122	28.15	0.000192122		28.15	0.000589699	28.15	0.000589699
25.29	9.08146e-06	25.29	8.25588e-06		26.52	1.99831e-05	26.52	1.99831e-05		28.28	6.17765e-05	28.28	6.17765e-05		28.28	0.000192773	28.28	0.000192773		28.28	0.000591929	28.28	0.000591929
25.4	9.09505e-06	25.4	8.26822e-06		26.63	2.01477e-05	26.63	2.01477e-05		28.41	6.2055e-05	28.41	6.2055e-05		28.41	0.00019364	28.41	0.00019364		28.41	0.000594207	28.41	0.000594207
25.5	9.09688e-06	25.5	8.26989e-06		26.75	2.02006e-05	26.75	2.02006e-05		28.54	6.20689e-05	28.54	6.20689e-05		28.54	0.000194329	28.54	0.000194329		28.53	0.000596518	28.53	0.000596518
25.6	9.08736e-06	25.6	8.26124e-06		26.86	2.01628e-05	26.86	2.01628e-05		28.66	6.22148e-05	28.66	6.22148e-05		28.66	0.000195459	28.66	0.000195459		28.66	0.000598857	28.66	0.000598857
25.71	9.09109e-06	25.71	8.26463e-06		26.97	2.03119e-05	26.97	2.03119e-05		28.79	6.23072e-05	28.79	6.23072e-05		28.79	0.000195672	28.79	0.000195672		28.79	0.000601203	28.79	0.000601203
25.81	9.06523e-06	25.81	8.24112e-06		27.09	2.04106e-05	27.09	2.04106e-05		28.92	6.23069e-05	28.92	6.23069e-05		28.92	0.000196386	28.92	0.000196386		28.92	0.000603485	28.92	0.000603485
25.91	9.06756e-06	25.91	8.24323e-06		27.2	2.0385e-05	27.2	2.0385e-05		29.05	6.25915e-05	29.05	6.25915e-05		29.05	0.000197423	29.05	0.000197423		29.05	0.000605675	29.05	0.000605675
26.02	9.01293e-06	26.02	8.19357e-06		27.31	2.04244e-05	27.31	2.04244e-05		29.18	6.27477e-05	29.18	6.27477e-05		29.18	0.000197464	29.18	0.000197464		29.18	0.000607896	29.18	0.000607896
26.12	9.01357e-06	26.12	8.19416e-06		27.43	2.05656e-05	27.43	2.05656e-05		29.31	6.27159e-05	29.31	6.27159e-05		29.31	0.000198137	29.31	0.000198137		29.31	0.000610162	29.31	0.000610162
26.22	9.0085e-06	26.22	8.18954e-06		27.54	2.06498e-05	27.54	2.06498e-05		29.44	6.30952e-05	29.44	6.30952e-05		29.44	0.000199271	29.44	0.000199271		29.44	0.000612501	29.44	0.000612501
26.33	9.01705e-06	26.33	8.19732e-06		27.65	2.06311e-05	27.65	2.06311e-05		29.57	6.31827e-05	29.57	6.31827e-05		29.57	0.0001996	29.57	0.0001996		29.57	0.000614802	29.57	0.000614802
26.43	9.02411e-06	26.43	8.20373e-06		27.77	2.06706e-05	27.77	2.06706e-05		29.7	6.30845e-05	29.7	6.30845e-05		29.7	0.000200268	29.7	0.000200268		29.7	0.000617093	29.7	0.000617093
26.53	9.01909e-06	26.53	8.19918e-06		27.88	2.07641e-05	27.88	2.07641e-05		29.83	6.33159e-05	29.83	6.33159e-05		29.83	0.00020109	29.83	0.00020109		29.96	0.000621572	29.96	0.000621572
26.64	9.01495e-06	26.64	8.19541e-06		28	2.08192e-05	28	2.08192e-05		29.96	6.34947e-05	29.96	6.34947e-05		29.96	0.000201452	29.96	0.000201452		30.09	0.000623794	30.09	0.000623794
26.74	9.02621e-06	26.74	8.20564e-06		28.11	2.07865e-05	28.11	2.07865e-05		30.09	6.35029e-05	30.09	6.35029e-05		30.09	0.000202107	30.09	0.000202107		30.22	0.000626087	30.22	0.000626087
26.84	9.01781e-06	26.84	8.19801e-06		28.22	2.0866e-05	28.22	2.0866e-05		30.22	6.37297e-05	30.22	6.37297e-05		30.22	0.000203307	30.22	0.000203307		30.35	0.000628469	30.35	0.000628469
26.95	9.0356e-06	26.95	8.21418e-06		28.34	2.09868e-05	28.34	2.09868e-05		30.35	6.39206e-05	30.35	6.39206e-05		30.35	0.000204014	30.35	0.000204014		30.48	0.000630841	30.48	0.000630841
27.05	9.00266e-06	27.05	8.18424e-06		28.45	2.10568e-05	28.45	2.10568e-05		30.48	6.39043e-05	30.48	6.39043e-05		30.48	0.000204528	30.48	0.000204528		30.61	0.000633112	30.61	0.000633112
27.15	9.03365e-06	27.15	8.21241e-06		28.57	2.10274e-05	28.57	2.10274e-05		30.61	6.4064e-05	30.61	6.4064e-05		30.61	0.000205349	30.61	0.000205349		30.74	0.000635339	30.74	0.000635339
27.26	9.04961e-06	27.26	8.22692e-06		28.68	2.10859e-05	28.68	2.10859e-05		30.74	6.42586e-05	30.74	6.42586e-05		30.74	0.000205799	30.74	0.000205799		30.87	0.000637561	30.87	0.000637561
27.36	9.08178e-06	27.36	8.25617e-06		28.8	2.12246e-05	28.8	2.12246e-05		30.87	6.44115e-05	30.87	6.44115e-05		30.87	0.000206053	30.87	0.000206053		31	0.000639837	31	0.000639837
27.46	9.06409e-06	27.46	8.24008e-06		28.91	2.12679e-05	28.91	2.12679e-05		31	6.43409e-05	31	6.43409e-05		31	0.000206748	31	0.000206748		31.13	0.000642168	31.13	0.000642168
27.57	9.08243e-06	27.57	8.25675e-06		29.02	2.12477e-05	29.02	2.12477e-05		31.13	6.45367e-05	31.13	6.45367e-05		31.13	0.000207674	31.13	0.000207674		31.26	0.000644449	31.26	0.000644449
27.67	9.07414e-06	27.67	8.24921e-06		29.14	2.12656e-05	29.14	2.12656e-05		31.27	6.47216e-05	31.27	6.47216e-05		31.27	0.000208312	31.27	0.000208312		31.4	0.000646667	31.4	0.000646667
27.77	9.11198e-06	27.77	8.28362e-06		29.25	2.13045e-05	29.25	2.13045e-05		31.4	6.48741e-05	31.4	6.48741e-05		31.4	0.000208585	31.4	0.000208585		31.53	0.000648914	31.53	0.000648914
27.88	9.12077e-06	27.88	8.29161e-06		29.37	2.13969e-05	29.37	2.13969e-05		31.53	6.49652e-05	31.53	6.49652e-05		31.53	0.000209105	31.53	0.000209105		31.66	0.000651217	31.66	0.000651217
27.98	9.08928e-06	27.98	8.26298e-06		29.48	2.1413e-05	29.48	2.1413e-05		31.66	6.50055e-05	31.66	6.50055e-05		31.66	0.000210168	31.66	0.000210168		31.79	0.00065356	31.79	0.00065356
28.08	9.10856e-06	28.08	8.28051e-06		29.6	2.14234e-05	29.6	2.14234e-05		31.79	6.51643e-05	31.79	6.51643e-05		31.79	0.000211075	31.79	0.000211075		31.92	0.000655877	31.92	0.000655877
28.19	9.10843e-06	28.19	8.28039e-06		29.71	2.14206e-05	29.71	2.14206e-05		31.92	6.54397e-05	31.92	6.54397e-05		31.92	0.000211632	31.92	0.000211632		32.05	0.000658115	32.05	0.000658115
28.29	9.15201e-06	28.29	8.32001e-06		29.83	2.14862e-05	29.83	2.14862e-05		32.06	6.55363e-05	32.06	6.55363e-05		32.06	0.000212088	32.06	0.000212088		32.19	0.000660347	32.19	0.000660347
28.39	9.18503e-06	28.39	8.35003e-06		29.94	2.15353e-05	29.94	2.15353e-05		32.19	6.56625e-05	32.19	6.56625e-05		32.19	0.00021274	32.19	0.00021274		32.32	0.000662645	32.32	0.000662645
28.5	9.20411e-06	28.5	8.36737e-06		30.06	2.15682e-05	30.06	2.15682e-05		32.32	6.5732e-05	32.32	6.5732e-05		32.32	0.000213276	32.32	0.000213276		32.45	0.000665009	32.45	0.000665009
28.6	9.1755e-06	28.6	8.34137e-06		30.17	2.15635e-05	30.17	2.15635e-05		32.45	6.57965e-05	32.45	6.57965e-05		32.45	0.000213824	32.45	0.000213824		32.59	0.000667271	32.59	0.000667271
28.7	9.18919e-06	28.7	8.35381e-06		30.29	2.15926e-05	30.29	2.15926e-05		32.59	6.59548e-05	32.59	6.59548e-05		32.59	0.000214525	32.59	0.000214525		32.72	0.000669484	32.72	0.000669484
28.81	9.19486e-06	28.81	8.35896e-06		30.4	2.16134e-05	30.4	2.16134e-05		32.72	6.62139e-05	32.72	6.62139e-05		32.72	0.000215481	32.72	0.000215481		32.85	0.000671739	32.85	0.000671739
28.91	9.21607e-06	28.91	8.37825e-06		30.52	2.17088e-05	30.52	2.17088e-05		32.85	6.64451e-05	32.85	6.64451e-05		32.85	0.00021643	32.85	0.00021643		32.98	0.000674174	32.98	0.000674174
29.02	9.19214e-06	29.02	8.35649e-06		30.63	2.17928e-05	30.63	2.17928e-05		32.98	6.66592e-05	32.98	6.66592e-05		32.98	0.000217051	32.98	0.000217051		33.12	0.000676497	33.12	0.000676497
29.12	9.25495e-06	29.12	8.41359e-06		30.75	2.17857e-05	30.75	2.17857e-05		33.12	6.66223e-05	33.12	6.66223e-05		33.12	0.000217321	33.12	0.000217321		33.25	0.000678753	33.25	0.000678753
29.22	9.25668e-06	29.22	8.41516e-06		30.87	2.17761e-05	30.87	2.17761e-05		33.25	6.65798e-05	33.25	6.65798e-05		33.25	0.00021786	33.25	0.00021786		33.38	0.000681079	33.38	0.000681079
29.33	9.30448e-06	29.33	8.45862e-06		30.98	2.1767e-05	30.98	2.1767e-05		33.38	6.66455e-05	33.38	6.66455e-05		33.38	0.000218663	33.38	0.000218663		33.52	0.000683519	33.52	0.000683519
29.43	9.29355e-06	29.43	8.44868e-06		31.1	2.18888e-05	31.1	2.18888e-05		33.52	6.67836e-05	33.52	6.67836e-05		33.52	0.000219192	33.52	0.000219192		33.65	0.000685938	33.65	0.000685938
29.53	9.25222e-06	29.53	8.41111e-06		31.21	2.19549e-05	31.21	2.19549e-05		33.65	6.70454e-05	33.65	6.70454e-05		33.65	0.000219601	33.65	0.000219601		33.78	0.000688179	33.78	0.000688179
29.64	9.27828e-06	29.64	8.4348e-06		31.33	2.20027e-05	31.33	2.20027e-05		33.79	6.72672e-05	33.79	6.72672e-05		33.79	0.000220579	33.79	0.000220579		33.92	0.000690519	33.92	0.000690519
29.74	9.26189e-06	29.74	8.4199e-06		31.44	2.1998e-05	31.44	2.1998e-05		33.92	6.75351e-05	33.92	6.75351e-05		33.92	0.000221677	33.92	0.000221677		34.05	0.000693028	34.05	0.000693028
29.84	9.29345e-06	29.84	8.44859e-06		31.56	2.20186e-05	31.56	2.20186e-05		34.05	6.77714e-05	34.05	6.77714e-05		34.05	0.000222334	34.05	0.000222334		34.19	0.000695415	34.19	0.000695415
29.95	9.2852e-06	29.95	8.44109e-06		31.67	2.20758e-05	31.67	2.20758e-05		34.19	6.79664e-05	34.19	6.79664e-05		34.19	0.00022291	34.19	0.00022291		34.32	0.000697663	34.32	0.000697663
30.05	9.32309e-06	30.05	8.47553e-06		31.79	2.21449e-05	31.79	2.21449e-05		34.32	6.81089e-05	34.32	6.81089e-05		34.32	0.000223662	34.32	0.000223662		34.46	0.00070007	34.46	0.00070007
30.16	9.26938e-06	30.16	8.42671e-06		31.91	2.22379e-05	31.91	2.22379e-05		34.46	6.82572e-05	34.46	6.82572e-05		34.46	0.000224331	34.46	0.000224331		34.59	0.000702566	34.59	0.000702566
30.26	9.28089e-06	30.26	8.43717e-06		32.02	2.23445e-05	32.02	2.23445e-05		34.59	6.85471e-05	34.59	6.85471e-05		34.59	0.00022475	34.59	0.00022475		34.72	0.000704875	34.72	0.000704875
30.36	9.24973e-06	30.36	8.40885e-06		32.14	2.24256e-05	32.14	2.24256e-05		34.73	6.87186e-05	34.73	6.87186e-05		34.73	0.000225357	34.73	0.000225357		34.86	0.000707112	34.86	0.000707112
30.47	9.2932e-06	30.47	8.44837e-06		32.26	2.24593e-05	32.26	2.24593e-05		34.86	6.87224e-05	34.86	6.87224e-05		34.86	0.000226084	34.86	0.000226084		34.99	0.000709557	34.99	0.000709557
30.57	9.32428e-06	30.57	8.47662e-06		32.37	2.2463e-05	32.37	2.2463e-05		35	6.89293e-05	35	6.89293e-05		35	0.000226569	35	0.000226569		35.13	0.000711954	35.13	0.000711954
30.68	9.31644e-06	30.68	8.46949e-06		32.49	2.24579e-05	32.49	2.24579e-05		35.13	6.9222e-05	35.13	6.9222e-05		35.13	0.00022696	35.13	0.00022696		35.27	0.00071426	35.27	0.00071426
30.78	9.32216e-06	30.78	8.47469e-06		32.6	2.24113e-05	32.6	2.24113e-05		35.27	6.93546e-05	35.27	6.93546e-05		35.27	0.000227734	35.27	0.000227734		35.4	0.000716609	35.4	0.000716609
30.88	9.32839e-06	30.88	8.48035e-06		32.72	2.24603e-05	32.72	2.24603e-05		35.4	6.95331e-05	35.4	6.95331e-05		35.4	0.000228506	35.4	0.000228506		35.54	0.000718955	35.54	0.000718955
30.99	9.32376e-06	30.99	8.47615e-06		32.84	2.24814e-05	32.84	2.24814e-05		35.54	6.98335e-05	35.54	6.98335e-05		35.54	0.000229083	35.54	0.000229083		35.67	0.000721094	35.67	0.000721094
31.09	9.32725e-06	31.09	8.47932e-06		32.95	2.25439e-05	32.95	2.25439e-05		35.67	7.00676e-05	35.67	7.00676e-05		35.67	0.00022976	35.67	0.00022976		35.81	0.000723237	35.81	0.000723237
31.19	9.33712e-06	31.19	8.48829e-06		33.07	2.25431e-05	33.07	2.25431e-05		35.81	7.01549e-05	35.81	7.01549e-05		35.81	0.00023074	35.81	0.00023074		35.94	0.000725515	35.94	0.000725515
31.3	9.33038e-06	31.3	8.48217e-06		33.19	2.25195e-05	33.19	2.25195e-05		35.94	7.03468e-05	35.94	7.03468e-05		35.94	0.000231428	35.94	0.000231428		36.08	0.000727679	36.08	0.000727679
31.4	9.37591e-06	31.4	8.52356e-06		33.3	2.2591e-05	33.3	2.2591e-05		36.08	7.04822e-05	36.08	7.04822e-05		36.08	0.000231854	36.08	0.000231854		36.22	0.000729906	36.22	0.000729906
31.51	9.37849e-06	31.51	8.5259e-06		33.42	2.25485e-05	33.42	2.25485e-05		36.22	7.05671e-05	36.22	7.05671e-05		36.22	0.000232881	36.22	0.000232881		36.35	0.000732337	36.35	0.000732337
31.61	9.3882e-06	31.61	8.53472e-06		33.54	2.25223e-05	33.54	2.25223e-05		36.35	7.06092e-05	36.35	7.06092e-05		36.35	0.000233496	36.35	0.000233496		36.49	0.000734704	36.49	0.000734704
31.71	9.36671e-06	31.71	8.51519e-06		33.65	2.2504e-05	33.65	2.2504e-05		36.49	7.08493e-05	36.49	7.08493e-05		36.49	0.000234001	36.49	0.000234001		36.63	0.00073698	36.63	0.00073698
31.82	9.35526e-06	31.82	8.50478e-06		33.77	2.24873e-05	33.77	2.24873e-05		36.63	7.09272e-05	36.63	7.09272e-05		36.63	0.000235073	36.63	0.000235073		36.76	0.000739464	36.76	0.000739464
31.92	9.33366e-06	31.92	8.48514e-06		33.89	2.24477e-05	33.89	2.24477e-05		36.76	7.09689e-05	36.76	7.09689e-05		36.76	0.000235923	36.76	0.000235923		36.9	0.000741885	36.9	0.000741885
32.03	9.38149e-06	32.03	8.52863e-06		34	2.24433e-05	34	2.24433e-05		36.9	7.12536e-05	36.9	7.12536e-05		36.9	0.000236412	36.9	0.000236412		37.04	0.000744147	37.04	0.000744147
32.13	9.37446e-06	32.13	8.52223e-06		34.12	2.24354e-05	34.12	2.24354e-05		37.04	7.13936e-05	37.04	7.13936e-05		37.04	0.000237293	37.04	0.000237293		37.18	0.000746641	37.18	0.000746641
32.23	9.38013e-06	32.23	8.52739e-06		34.24	2.24323e-05	34.24	2.24323e-05		37.18	7.15002e-05	37.18	7.15002e-05		37.18	0.000237908	37.18	0.000237908		37.31	0.000748985	37.31	0.000748985
32.34	9.38836e-06	32.34	8.53487e-06		34.36	2.24235e-05	34.36	2.24235e-05		37.31	7.17589e-05	37.31	7.17589e-05		37.31	0.000238452	37.31	0.000238452		37.45	0.00075118	37.45	0.00075118
32.44	9.37933e-06	32.44	8.52666e-06		34.47	2.2474e-05	34.47	2.2474e-05		37.45	7.17949e-05	37.45	7.17949e-05		37.45	0.000239349	37.45	0.000239349		37.59	0.000753587	37.59	0.000753587
32.55	9.4025e-06	32.55	8.54773e-06		34.59	2.25078e-05	34.59	2.25078e-05		37.59	7.16634e-05	37.59	7.16634e-05		37.59	0.000239914	37.59	0.000239914		37.72	0.000755807	37.72	0.000755807
32.65	9.40768e-06	32.65	8.55243e-06		34.71	2.24567e-05	34.71	2.24567e-05		37.73	7.1774e-05	37.73	7.1774e-05		37.73	0.000240462	37.73	0.000240462		37.86	0.000757976	37.86	0.000757976
32.75	9.42782e-06	32.75	8.57075e-06		34.83	2.2465e-05	34.83	2.2465e-05		37.86	7.19872e-05	37.86	7.19872e-05		37.86	0.00024161	37.86	0.00024161		38	0.000760222	38	0.000760222
32.86	9.42368e-06	32.86	8.56698e-06		34.94	2.25076e-05	34.94	2.25076e-05		38	7.21922e-05	38	7.21922e-05		38	0.000241937	38	0.000241937		38.14	0.0007623	38.14	0.0007623
32.96	9.43872e-06	32.96	8.58066e-06		35.06	2.25807e-05	35.06	2.25807e-05		38.14	7.24713e-05	38.14	7.24713e-05		38.14	0.000242544	38.14	0.000242544		38.28	0.000764425	38.28	0.000764425
33.07	9.40524e-06	33.07	8.55022e-06		35.18	2.26167e-05	35.18	2.26167e-05		38.28	7.25169e-05	38.28	7.25169e-05		38.28	0.000243091	38.28	0.000243091		38.42	0.000766638	38.42	0.000766638
33.17	9.41643e-06	33.17	8.56039e-06		35.3	2.2697e-05	35.3	2.2697e-05		38.42	7.25128e-05	38.42	7.25128e-05		38.42	0.000243247	38.42	0.000243247		38.55	0.000768653	38.55	0.000768653
33.28	9.43742e-06	33.28	8.57947e-06		35.41	2.27342e-05	35.41	2.27342e-05		38.56	7.27681e-05	38.56	7.27681e-05		38.56	0.000244396	38.56	0.000244396		38.69	0.00077083	38.69	0.00077083
33.38	9.45839e-06	33.38	8.59854e-06		35.53	2.27806e-05	35.53	2.27806e-05		38.69	7.29606e-05	38.69	7.29606e-05		38.69	0.000245068	38.69	0.000245068		38.83	0.000772907	38.83	0.000772907
33.48	9.46669e-06	33.48	8.60608e-06		35.65	2.28519e-05	35.65	2.28519e-05		38.83	7.31203e-05	38.83	7.31203e-05		38.83	0.000245535	38.83	0.000245535		38.97	0.000774873	38.97	0.000774873
33.59	9.44116e-06	33.59	8.58288e-06		35.77	2.29721e-05	35.77	2.29721e-05		38.97	7.32918e-05	38.97	7.32918e-05		38.97	0.000246244	38.97	0.000246244		39.11	0.000777107	39.11	0.000777107
33.69	9.42041e-06	33.69	8.56401e-06		35.88	2.30198e-05	35.88	2.30198e-05		39.11	7.32658e-05	39.11	7.32658e-05		39.11	0.000246731	39.11	0.000246731		39.25	0.000779142	39.25	0.000779142
33.8	9.4249e-06	33.8	8.56809e-06		36	2.30675e-05	36	2.30675e-05		39.25	7.35383e-05	39.25	7.35383e-05		39.25	0.000247982	39.25	0.000247982		39.39	0.000781264	39.39	0.000781264
33.9	9.4377e-06	33.9	8.57973e-06		36.12	2.31481e-05	36.12	2.31481e-05		39.39	7.38474e-05	39.39	7.38474e-05		39.39	0.000248311	39.39	0.000248311		39.53	0.000783429	39.53	0.000783429
34	9.43588e-06	34	8.57807e-06		36.24	2.3172e-05	36.24	2.3172e-05		39.53	7.38578e-05	39.53	7.38578e-05		39.53	0.000248478	39.53	0.000248478		39.67	0.0007854	39.67	0.0007854
34.11	9.48747e-06	34.11	8.62497e-06		36.36	2.32477e-05	36.36	2.32477e-05		39.67	7.41294e-05	39.67	7.41294e-05		39.67	0.000249615	39.67	0.000249615		39.81	0.000787554	39.81	0.000787554
34.21	9.47326e-06	34.21	8.61206e-06		36.48	2.33947e-05	36.48	2.33947e-05		39.81	7.4401e-05	39.81	7.4401e-05		39.81	0.000250082	39.81	0.000250082		39.95	0.000789568	39.95	0.000789568
34.32	9.50274e-06	34.32	8.63885e-06		36.59	2.34106e-05	36.59	2.34106e-05		39.95	7.46876e-05	39.95	7.46876e-05		39.95	0.000250758	39.95	0.000250758		40.09	0.000791719	40.09	0.000791719
34.42	9.47183e-06	34.42	8.61076e-06		36.71	2.34878e-05	36.71	2.34878e-05		40.09	7.46994e-05	40.09	7.46994e-05		40.09	0.000251155	40.09	0.000251155		40.23	0.00079389	40.23	0.00079389
34.53	9.48761e-06	34.53	8.6251e-06		36.83	2.34959e-05	36.83	2.34959e-05		40.23	7.4907e-05	40.23	7.4907e-05		40.23	0.000252096	40.23	0.000252096		40.37	0.000796003	40.37	0.000796003
34.63	9.52332e-06	34.63	8.65757e-06		36.95	2.35125e-05	36.95	2.35125e-05		40.37	7.51905e-05	40.37	7.51905e-05		40.37	0.000252827	40.37	0.000252827		40.51	0.000798397	40.51	0.000798397
34.74	9.51073e-06	34.74	8.64612e-06		37.07	2.35634e-05	37.07	2.35634e-05		40.51	7.50772e-05	40.51	7.50772e-05		40.51	0.000252862	40.51	0.000252862		40.65	0.000800593	40.65	0.000800593
34.84	9.53401e-06	34.84	8.66728e-06		37.19	2.36501e-05	37.19	2.36501e-05		40.65	7.53416e-05	40.65	7.53416e-05		40.65	0.000254135	40.65	0.000254135		40.79	0.000802933	40.79	0.000802933
34.94	9.55197e-06	34.94	8.68361e-06		37.31	2.37035e-05	37.31	2.37035e-05		40.79	7.56664e-05	40.79	7.56664e-05		40.79	0.000254308	40.79	0.000254308		40.93	0.000805205	40.93	0.000805205
35.05	9.5804e-06	35.05	8.70946e-06		37.42	2.3728e-05	37.42	2.3728e-05		40.93	7.56193e-05	40.93	7.56193e-05		40.93	0.000255138	40.93	0.000255138		41.07	0.000807502	41.07	0.000807502
35.15	9.58671e-06	35.15	8.71519e-06		37.54	2.37745e-05	37.54	2.37745e-05		41.07	7.58317e-05	41.07	7.58317e-05		41.07	0.000256034	41.07	0.000256034		41.21	0.000809948	41.21	0.000809948
35.26	9.64856e-06	35.26	8.77142e-06		37.66	2.37706e-05	37.66	2.37706e-05		41.22	7.60567e-05	41.22	7.60567e-05		41.22	0.000256465	41.22	0.000256465		41.36	0.000812274	41.36	0.000812274
35.36	9.65008e-06	35.36	8.7728e-06		37.78	2.37668e-05	37.78	2.37668e-05		41.36	7.60295e-05	41.36	7.60295e-05		41.36	0.00025717	41.36	0.00025717		41.5	0.000814775	41.5	0.000814775
35.47	9.66204e-06	35.47	8.78367e-06		37.9	2.37903e-05	37.9	2.37903e-05		41.5	7.62844e-05	41.5	7.62844e-05		41.5	0.000257693	41.5	0.000257693		41.64	0.000817033	41.64	0.000817033
35.57	9.68315e-06	35.57	8.80287e-06		38.02	2.37972e-05	38.02	2.37972e-05		41.64	7.64657e-05	41.64	7.64657e-05		41.64	0.00025823	41.64	0.00025823		41.78	0.000819548	41.78	0.000819548
35.67	9.68673e-06	35.67	8.80612e-06		38.14	2.38099e-05	38.14	2.38099e-05		41.78	7.66268e-05	41.78	7.66268e-05		41.78	0.000259064	41.78	0.000259064		41.92	0.000821866	41.92	0.000821866
35.78	9.76237e-06	35.78	8.87488e-06		38.26	2.37947e-05	38.26	2.37947e-05		41.92	7.68848e-05	41.92	7.68848e-05		41.92	0.000259659	41.92	0.000259659		42.07	0.000824444	42.07	0.000824444
35.88	9.76412e-06	35.88	8.87647e-06		38.38	2.3742e-05	38.38	2.3742e-05		42.07	7.68759e-05	42.07	7.68759e-05		42.07	0.000259763	42.07	0.000259763		42.21	0.000826888	42.21	0.000826888
35.99	9.80691e-06	35.99	8.91537e-06		38.5	2.36997e-05	38.5	2.36997e-05		42.21	7.72613e-05	42.21	7.72613e-05		42.21	0.000260885	42.21	0.000260885		42.35	0.000829355	42.35	0.000829355
36.09	9.78654e-06	36.09	8.89686e-06		38.61	2.36198e-05	38.61	2.36198e-05		42.35	7.74859e-05	42.35	7.74859e-05		42.35	0.000260801	42.35	0.000260801		42.49	0.000831714	42.49	0.000831714
36.2	9.8059e-06	36.2	8.91446e-06		38.73	2.36113e-05	38.73	2.36113e-05		42.49	7.7607e-05	42.49	7.7607e-05		42.49	0.000262038	42.49	0.000262038		42.64	0.00083398	42.64	0.00083398
36.3	9.84155e-06	36.3	8.94686e-06		38.85	2.36017e-05	38.85	2.36017e-05		42.64	7.78736e-05	42.64	7.78736e-05		42.64	0.000262168	42.64	0.000262168		42.78	0.000836279	42.78	0.000836279
36.41	9.87252e-06	36.41	8.97502e-06		38.97	2.35946e-05	38.97	2.35946e-05		42.78	7.80229e-05	42.78	7.80229e-05		42.78	0.000263292	42.78	0.000263292		42.92	0.000838444	42.92	0.000838444
36.51	9.92619e-06	36.51	9.02381e-06		39.09	2.36528e-05	39.09	2.36528e-05		42.92	7.84969e-05	42.92	7.84969e-05		42.92	0.000263431	42.92	0.000263431		43.06	0.00084075	43.06	0.00084075
36.62	9.91576e-06	36.62	9.01432e-06		39.21	2.36927e-05	39.21	2.36927e-05		43.07	7.85761e-05	43.07	7.85761e-05		43.07	0.000264523	43.07	0.000264523		43.21	0.000842994	43.21	0.000842994
36.72	9.96094e-06	36.72	9.0554e-06		39.33	2.37136e-05	39.33	2.37136e-05		43.21	7.89463e-05	43.21	7.89463e-05		43.21	0.000265123	43.21	0.000265123		43.35	0.000845424	43.35	0.000845424
36.82	9.95788e-06	36.82	9.05262e-06		39.45	2.37719e-05	39.45	2.37719e-05		43.35	7.89298e-05	43.35	7.89298e-05		43.35	0.000265806	43.35	0.000265806		43.49	0.0008477	43.49	0.0008477
36.93	9.99257e-06	36.93	9.08416e-06		39.57	2.37993e-05	39.57	2.37993e-05		43.5	7.94535e-05	43.5	7.94535e-05		43.5	0.000266272	43.5	0.000266272		43.64	0.000850148	43.64	0.000850148
37.03	1.00009e-05	37.03	9.09173e-06		39.69	2.38652e-05	39.69	2.38652e-05		43.64	7.9543e-05	43.64	7.9543e-05		43.64	0.000267252	43.64	0.000267252		43.78	0.000852479	43.78	0.000852479
37.14	1.00001e-05	37.14	9.09102e-06		39.81	2.3926e-05	39.81	2.3926e-05		43.78	7.98399e-05	43.78	7.98399e-05		43.78	0.000267789	43.78	0.000267789		43.93	0.000854952	43.93	0.000854952
37.24	9.98376e-06	37.24	9.07615e-06		39.93	2.39304e-05	39.93	2.39304e-05		43.93	7.99101e-05	43.93	7.99101e-05		43.93	0.00026854	43.93	0.00026854		44.07	0.000857302	44.07	0.000857302
37.35	9.95213e-06	37.35	9.04739e-06		40.05	2.39706e-05	40.05	2.39706e-05		44.07	8.02228e-05	44.07	8.02228e-05		44.07	0.000268734	44.07	0.000268734		44.21	0.000859774	44.21	0.000859774
37.45	9.93734e-06	37.45	9.03395e-06		40.17	2.4031e-05	40.17	2.4031e-05		44.22	8.0147e-05	44.22	8.0147e-05		44.22	0.000269752	44.22	0.000269752		44.36	0.000862185	44.36	0.000862185
37.56	9.9495e-06	37.56	9.045e-06		40.29	2.40143e-05	40.29	2.40143e-05		44.36	8.0278e-05	44.36	8.0278e-05		44.36	0.00026988	44.36	0.00026988		44.5	0.000864644	44.5	0.000864644
37.66	9.97231e-06	37.66	9.06574e-06		40.41	2.40618e-05	40.41	2.40618e-05		44.5	8.04401e-05	44.5	8.04401e-05		44.5	0.000270818	44.5	0.000270818		44.65	0.000867098	44.65	0.000867098
37.77	9.94643e-06	37.77	9.04221e-06		40.53	2.41055e-05	40.53	2.41055e-05		44.65	8.0508e-05	44.65	8.0508e-05		44.65	0.000271203	44.65	0.000271203		44.79	0.000869504	44.79	0.000869504
37.87	9.94371e-06	37.87	9.03974e-06		40.65	2.41692e-05	40.65	2.41692e-05		44.79	8.07716e-05	44.79	8.07716e-05		44.79	0.000271944	44.79	0.000271944		44.94	0.00087203	44.94	0.00087203
37.98	9.90373e-06	37.98	9.00339e-06		40.77	2.42343e-05	40.77	2.42343e-05		44.94	8.08345e-05	44.94	8.08345e-05		44.94	0.000272371	44.94	0.000272371		45.08	0.000874435	45.08	0.000874435
38.08	9.92645e-06	38.08	9.02405e-06		40.89	2.42647e-05	40.89	2.42647e-05		45.08	8.11085e-05	45.08	8.11085e-05		45.08	0.000273074	45.08	0.000273074		45.23	0.000876963	45.23	0.000876963
38.19	9.92069e-06	38.19	9.01881e-06		41.01	2.42251e-05	41.01	2.42251e-05		45.23	8.12616e-05	45.23	8.12616e-05		45.23	0.000273466	45.23	0.000273466		45.38	0.000879368	45.38	0.000879368
38.29	9.95267e-06	38.29	9.04789e-06		41.13	2.42166e-05	41.13	2.42166e-05		45.38	8.12484e-05	45.38	8.12484e-05		45.38	0.000274103	45.38	0.000274103		45.52	0.000881955	45.52	0.000881955
38.4	9.94542e-06	38.4	9.04129e-06		41.26	2.42192e-05	41.26	2.42192e-05		45.52	8.16764e-05	45.52	8.16764e-05		45.52	0.000274546	45.52	0.000274546		45.67	0.000884432	45.67	0.000884432
38.5	9.95411e-06	38.5	9.04919e-06		41.38	2.42189e-05	41.38	2.42189e-05		45.67	8.15876e-05	45.67	8.15876e-05		45.67	0.000275785	45.67	0.000275785		45.81	0.000887078	45.81	0.000887078
38.61	9.94126e-06	38.61	9.03751e-06		41.5	2.41955e-05	41.5	2.41955e-05		45.81	8.18973e-05	45.81	8.18973e-05		45.81	0.000275813	45.81	0.000275813		45.96	0.000889583	45.96	0.000889583
38.71	9.96499e-06	38.71	9.05908e-06		41.62	2.41992e-05	41.62	2.41992e-05		45.96	8.21731e-05	45.96	8.21731e-05		45.96	0.000276975	45.96	0.000276975		46.1	0.000892175	46.1	0.000892175
38.81	9.98528e-06	38.81	9.07753e-06		41.74	2.41223e-05	41.74	2.41223e-05		46.1	8.21973e-05	46.1	8.21973e-05		46.1	0.000277892	46.1	0.000277892		46.25	0.000894756	46.25	0.000894756
38.92	9.97967e-06	38.92	9.07243e-06		41.86	2.40898e-05	41.86	2.40898e-05		46.25	8.23616e-05	46.25	8.23616e-05		46.25	0.000278104	46.25	0.000278104		46.4	0.000897326	46.4	0.000897326
39.02	9.98293e-06	39.02	9.07539e-06		41.98	2.40657e-05	41.98	2.40657e-05		46.4	8.26971e-05	46.4	8.26971e-05		46.4	0.0002793	46.4	0.0002793		46.54	0.000899963	46.54	0.000899963
39.13	1.0012e-05	39.13	9.10181e-06		42.1	2.41005e-05	42.1	2.41005e-05		46.54	8.25515e-05	46.54	8.25515e-05		46.54	0.000279676	46.54	0.000279676		46.69	0.000902508	46.69	0.000902508
39.23	1.00483e-05	39.23	9.13479e-06		42.22	2.40868e-05	42.22	2.40868e-05		46.69	8.29253e-05	46.69	8.29253e-05		46.69	0.000280463	46.69	0.000280463		46.84	0.000905121	46.84	0.000905121
39.34	1.00146e-05	39.34	9.10421e-06		42.34	2.41213e-05	42.34	2.41213e-05		46.84	8.32595e-05	46.84	8.32595e-05		46.84	0.000280871	46.84	0.000280871		46.98	0.000907646	46.98	0.000907646
39.44	1.0004e-05	39.44	9.09457e-06		42.47	2.41171e-05	42.47	2.41171e-05		46.99	8.30809e-05	46.99	8.30809e-05		46.99	0.000281878	46.99	0.000281878		47.13	0.00091021	47.13	0.00091021
39.55	1.00348e-05	39.55	9.12252e-06		42.59	2.40637e-05	42.59	2.40637e-05		47.13	8.33069e-05	47.13	8.33069e-05		47.13	0.00028236	47.13	0.00028236		47.28	0.000912765	47.28	0.000912765
39.65	1.00482e-05	39.65	9.1347e-06		42.71	2.40772e-05	42.71	2.40772e-05		47.28	8.33838e-05	47.28	8.33838e-05		47.28	0.000282572	47.28	0.000282572		47.43	0.000915315	47.43	0.000915315
39.76	1.00849e-05	39.76	9.16814e-06		42.83	2.41145e-05	42.83	2.41145e-05		47.43	8.35631e-05	47.43	8.35631e-05		47.43	0.000283601	47.43	0.000283601		47.57	0.000917938	47.57	0.000917938
39.86	1.00749e-05	39.86	9.15897e-06		42.95	2.41824e-05	42.95	2.41824e-05		47.57	8.34408e-05	47.57	8.34408e-05		47.57	0.000283987	47.57	0.000283987		47.72	0.00092046	47.72	0.00092046
39.97	1.00728e-05	39.97	9.15706e-06		43.07	2.41587e-05	43.07	2.41587e-05		47.72	8.35889e-05	47.72	8.35889e-05		47.72	0.000284635	47.72	0.000284635		47.87	0.000923073	47.87	0.000923073
40.07	1.00719e-05	40.07	9.15623e-06		43.19	2.41699e-05	43.19	2.41699e-05		47.87	8.40812e-05	47.87	8.40812e-05		47.87	0.000285008	47.87	0.000285008		48.02	0.0009256	48.02	0.0009256
40.18	1.01174e-05	40.18	9.19765e-06		43.32	2.41988e-05	43.32	2.41988e-05		48.02	8.3929e-05	48.02	8.3929e-05		48.02	0.000285911	48.02	0.000285911		48.17	0.000928161	48.17	0.000928161
40.28	1.01086e-05	40.28	9.18968e-06		43.44	2.43036e-05	43.44	2.43036e-05		48.17	8.41021e-05	48.17	8.41021e-05		48.17	0.000287201	48.17	0.000287201		48.31	0.000930755	48.31	0.000930755
40.39	1.01034e-05	40.39	9.18495e-06		43.56	2.43683e-05	43.56	2.43683e-05		48.32	8.41192e-05	48.32	8.41192e-05		48.32	0.00028772	48.32	0.00028772		48.46	0.000933229	48.46	0.000933229
40.49	1.01116e-05	40.49	9.19239e-06		43.68	2.43897e-05	43.68	2.43897e-05		48.46	8.44022e-05	48.46	8.44022e-05		48.46	0.000288253	48.46	0.000288253		48.61	0.000935787	48.61	0.000935787
40.6	1.00834e-05	40.6	9.16676e-06		43.8	2.4408e-05	43.8	2.4408e-05		48.61	8.47382e-05	48.61	8.47382e-05		48.61	0.000289344	48.61	0.000289344		48.76	0.000938389	48.76	0.000938389
40.7	1.01089e-05	40.7	9.18987e-06		43.93	2.4457e-05	43.93	2.4457e-05		48.76	8.46752e-05	48.76	8.46752e-05		48.76	0.000289797	48.76	0.000289797		48.91	0.000940894	48.91	0.000940894
40.81	1.00965e-05	40.81	9.17862e-06		44.05	2.4537e-05	44.05	2.4537e-05		48.91	8.4781e-05	48.91	8.4781e-05		48.91	0.000291175	48.91	0.000291175		49.06	0.000943487	49.06	0.000943487
40.91	1.00697e-05	40.91	9.15423e-06		44.17	2.45564e-05	44.17	2.45564e-05		49.06	8.48669e-05	49.06	8.48669e-05		49.06	0.00029184	49.06	0.00029184		49.21	0.000946006	49.21	0.000946006
41.02	1.01042e-05	41.02	9.1856e-06		44.29	2.45873e-05	44.29	2.45873e-05		49.21	8.49905e-05	49.21	8.49905e-05		49.21	0.00029239	49.21	0.00029239		49.36	0.000948498	49.36	0.000948498
41.13	1.00981e-05	41.13	9.18007e-06		44.41	2.45619e-05	44.41	2.45619e-05		49.36	8.51941e-05	49.36	8.51941e-05		49.36	0.000293433	49.36	0.000293433		49.51	0.000951071	49.51	0.000951071
41.23	1.01489e-05	41.23	9.22625e-06		44.54	2.46463e-05	44.54	2.46463e-05		49.51	8.54201e-05	49.51	8.54201e-05		49.51	0.000293921	49.51	0.000293921		49.66	0.000953558	49.66	0.000953558
41.34	1.00821e-05	41.34	9.16552e-06		44.66	2.47036e-05	44.66	2.47036e-05		49.66	8.53373e-05	49.66	8.53373e-05		49.66	0.000294537	49.66	0.000294537		49.81	0.000956066	49.81	0.000956066
41.44	1.00798e-05	41.44	9.16349e-06		44.78	2.46967e-05	44.78	2.46967e-05		49.81	8.56133e-05	49.81	8.56133e-05		49.81	0.000295601	49.81	0.000295601		49.96	0.000958548	49.96	0.000958548
41.55	1.00775e-05	41.55	9.16134e-06		44.9	2.46637e-05	44.9	2.46637e-05		49.96	8.55448e-05	49.96	8.55448e-05		49.96	0.000296181	49.96	0.000296181		50.11	0.000960857	50.11	0.000960857
41.65	1.00832e-05	41.65	9.16654e-06		45.03	2.47656e-05	45.03	2.47656e-05		50.11	8.57808e-05	50.11	8.57808e-05		50.11	0.000296883	50.11	0.000296883		50.26	0.000963143	50.26	0.000963143
41.76	1.0117e-05	41.76	9.19723e-06		45.15	2.48367e-05	45.15	2.48367e-05		50.26	8.58068e-05	50.26	8.58068e-05		50.26	0.000297975	50.26	0.000297975		50.41	0.000965525	50.41	0.000965525
41.86	1.00803e-05	41.86	9.16389e-06		45.27	2.4819e-05	45.27	2.4819e-05		50.41	8.59299e-05	50.41	8.59299e-05		50.41	0.000298405	50.41	0.000298405		50.56	0.000967783	50.56	0.000967783
41.97	1.01087e-05	41.97	9.18969e-06		45.39	2.47511e-05	45.39	2.47511e-05		50.56	8.60408e-05	50.56	8.60408e-05		50.56	0.000299184	50.56	0.000299184		50.71	0.000970158	50.71	0.000970158
42.07	1.01101e-05	42.07	9.19101e-06		45.52	2.48684e-05	45.52	2.48684e-05		50.71	8.63786e-05	50.71	8.63786e-05		50.71	0.00030011	50.71	0.00030011		50.86	0.000972591	50.86	0.000972591
42.18	1.01345e-05	42.18	9.21318e-06		45.64	2.4886e-05	45.64	2.4886e-05		50.86	8.6588e-05	50.86	8.6588e-05		50.86	0.000300774	50.86	0.000300774		51.01	0.000975008	51.01	0.000975008
42.28	1.01305e-05	42.28	9.20956e-06		45.76	2.4833e-05	45.76	2.4833e-05		51.01	8.70144e-05	51.01	8.70144e-05		51.01	0.000301422	51.01	0.000301422		51.16	0.000977504	51.16	0.000977504
42.39	1.00962e-05	42.39	9.17835e-06		45.89	2.48531e-05	45.89	2.48531e-05		51.16	8.71008e-05	51.16	8.71008e-05		51.16	0.000302271	51.16	0.000302271		51.31	0.0009801	51.31	0.0009801
42.49	1.01011e-05	42.49	9.18281e-06		46.01	2.49914e-05	46.01	2.49914e-05		51.32	8.73097e-05	51.32	8.73097e-05		51.32	0.000303037	51.32	0.000303037		51.47	0.000982611	51.47	0.000982611
42.6	1.00916e-05	42.6	9.17418e-06		46.13	2.50324e-05	46.13	2.50324e-05		51.47	8.74719e-05	51.47	8.74719e-05		51.47	0.000303357	51.47	0.000303357		51.62	0.000985087	51.62	0.000985087
42.7	1.00865e-05	42.7	9.16958e-06		46.26	2.50557e-05	46.26	2.50557e-05		51.62	8.76977e-05	51.62	8.76977e-05		51.62	0.000304321	51.62	0.000304321		51.77	0.000987686	51.77	0.000987686
42.81	1.0068e-05	42.81	9.15276e-06		46.38	2.51803e-05	46.38	2.51803e-05		51.77	8.7653e-05	51.77	8.7653e-05		51.77	0.000304827	51.77	0.000304827		51.92	0.00099018	51.92	0.00099018
42.91	1.00861e-05	42.91	9.16917e-06		46.5	2.52276e-05	46.5	2.52276e-05		51.92	8.77572e-05	51.92	8.77572e-05		51.92	0.000305575	51.92	0.000305575		52.07	0.00099266	52.07	0.00099266
43.02	1.00917e-05	43.02	9.17425e-06		46.63	2.51586e-05	46.63	2.51586e-05		52.08	8.78742e-05	52.08	8.78742e-05		52.08	0.000306135	52.08	0.000306135		52.23	0.00099521	52.23	0.00099521
43.13	1.00762e-05	43.13	9.16019e-06		46.75	2.52208e-05	46.75	2.52208e-05		52.23	8.78248e-05	52.23	8.78248e-05		52.23	0.000307234	52.23	0.000307234		52.38	0.000997633	52.38	0.000997633
43.23	1.0094e-05	43.23	9.17633e-06		46.87	2.52607e-05	46.87	2.52607e-05		52.38	8.78798e-05	52.38	8.78798e-05		52.38	0.000307646	52.38	0.000307646		52.53	0.00100006	52.53	0.00100006
43.34	1.00646e-05	43.34	9.14961e-06		47	2.52816e-05	47	2.52816e-05		52.53	8.80061e-05	52.53	8.80061e-05		52.53	0.000308163	52.53	0.000308163		52.69	0.00100249	52.69	0.00100249
43.44	1.00988e-05	43.44	9.18074e-06		47.12	2.53018e-05	47.12	2.53018e-05		52.69	8.80829e-05	52.69	8.80829e-05		52.69	0.000309202	52.69	0.000309202		52.84	0.00100496	52.84	0.00100496
43.55	1.01253e-05	43.55	9.20484e-06		47.24	2.54815e-05	47.24	2.54815e-05		52.84	8.81939e-05	52.84	8.81939e-05		52.84	0.000309782	52.84	0.000309782		52.99	0.00100739	52.99	0.00100739
43.65	1.0122e-05	43.65	9.20178e-06		47.37	2.54658e-05	47.37	2.54658e-05		52.99	8.82268e-05	52.99	8.82268e-05		52.99	0.000310414	52.99	0.000310414		53.14	0.00100981	53.14	0.00100981
43.76	1.00988e-05	43.76	9.18074e-06		47.49	2.54994e-05	47.49	2.54994e-05		53.14	8.8423e-05	53.14	8.8423e-05		53.14	0.000311169	53.14	0.000311169		53.3	0.00101224	53.3	0.00101224
43.86	1.01213e-05	43.86	9.20117e-06		47.61	2.56239e-05	47.61	2.56239e-05		53.3	8.84278e-05	53.3	8.84278e-05		53.3	0.000312081	53.3	0.000312081		53.45	0.00101471	53.45	0.00101471
43.97	1.01721e-05	43.97	9.24735e-06		47.74	2.56301e-05	47.74	2.56301e-05		53.45	8.85303e-05	53.45	8.85303e-05		53.45	0.000313013	53.45	0.000313013		53.61	0.0010172	53.61	0.0010172
44.07	1.01344e-05	44.07	9.21312e-06		47.86	2.56916e-05	47.86	2.56916e-05		53.6	8.89432e-05	53.6	8.89432e-05		53.6	0.000313239	53.6	0.000313239		53.76	0.00101965	53.76	0.00101965
44.18	1.01166e-05	44.18	9.19689e-06		47.99	2.58046e-05	47.99	2.58046e-05		53.76	8.91252e-05	53.76	8.91252e-05		53.76	0.000314046	53.76	0.000314046		53.91	0.0010221	53.91	0.0010221
44.29	1.01303e-05	44.29	9.20939e-06		48.11	2.57657e-05	48.11	2.57657e-05		53.91	8.94993e-05	53.91	8.94993e-05		53.91	0.000315022	53.91	0.000315022		54.07	0.00102464	54.07	0.00102464
44.39	1.01271e-05	44.39	9.20647e-06		48.23	2.58148e-05	48.23	2.58148e-05		54.07	8.96885e-05	54.07	8.96885e-05		54.07	0.000315411	54.07	0.000315411		54.22	0.00102706	54.22	0.00102706
44.5	1.01554e-05	44.5	9.23217e-06		48.36	2.59336e-05	48.36	2.59336e-05		54.22	8.99651e-05	54.22	8.99651e-05		54.22	0.000315918	54.22	0.000315918		54.38	0.00102952	54.38	0.00102952
44.6	1.01327e-05	44.6	9.21159e-06		48.48	2.5906e-05	48.48	2.5906e-05		54.38	9.01424e-05	54.38	9.01424e-05		54.38	0.000316787	54.38	0.000316787		54.53	0.001032	54.53	0.001032
44.71	1.00982e-05	44.71	9.18018e-06		48.61	2.5982e-05	48.61	2.5982e-05		54.53	9.02289e-05	54.53	9.02289e-05		54.53	0.000317969	54.53	0.000317969		54.69	0.00103454	54.69	0.00103454
44.81	1.01175e-05	44.81	9.19777e-06		48.73	2.60859e-05	48.73	2.60859e-05		54.69	9.03566e-05	54.69	9.03566e-05		54.69	0.000318623	54.69	0.000318623		54.84	0.00103715	54.84	0.00103715
44.92	1.00898e-05	44.92	9.17253e-06		48.86	2.6074e-05	48.86	2.6074e-05		54.84	9.06939e-05	54.84	9.06939e-05		54.84	0.000319054	54.84	0.000319054		55	0.00103975	55	0.00103975
45.03	1.00627e-05	45.03	9.14793e-06		48.98	2.61336e-05	48.98	2.61336e-05		55	9.08891e-05	55	9.08891e-05		55	0.000319084	55	0.000319084		55.15	0.00104236	55.15	0.00104236
45.13	1.01009e-05	45.13	9.18261e-06		49.11	2.61912e-05	49.11	2.61912e-05		55.15	9.09729e-05	55.15	9.09729e-05		55.15	0.000319698	55.15	0.000319698		55.31	0.00104496	55.31	0.00104496
45.24	1.01377e-05	45.24	9.21611e-06		49.23	2.61889e-05	49.23	2.61889e-05		55.31	9.12888e-05	55.31	9.12888e-05		55.31	0.000320719	55.31	0.000320719		55.46	0.00104763	55.46	0.00104763
45.34	1.01363e-05	45.34	9.21482e-06		49.35	2.62547e-05	49.35	2.62547e-05		55.46	9.1547e-05	55.46	9.1547e-05		55.46	0.000321123	55.46	0.000321123		55.62	0.00105018	55.62	0.00105018
45.45	1.0155e-05	45.45	9.2318e-06		49.48	2.62834e-05	49.48	2.62834e-05		55.62	9.19475e-05	55.62	9.19475e-05		55.62	0.000321271	55.62	0.000321271		55.77	0.0010527	55.77	0.0010527
45.55	1.01685e-05	45.55	9.24406e-06		49.6	2.6292e-05	49.6	2.6292e-05		55.77	9.22127e-05	55.77	9.22127e-05		55.77	0.000321793	55.77	0.000321793		55.93	0.00105524	55.93	0.00105524
45.66	1.01786e-05	45.66	9.25326e-06		49.73	2.64155e-05	49.73	2.64155e-05		55.93	9.22829e-05	55.93	9.22829e-05		55.93	0.000322795	55.93	0.000322795		56.09	0.00105772	56.09	0.00105772
45.76	1.02028e-05	45.76	9.27525e-06		49.85	2.63565e-05	49.85	2.63565e-05		56.09	9.23892e-05	56.09	9.23892e-05		56.09	0.00032359	56.09	0.00032359		56.24	0.00106027	56.24	0.00106027
45.87	1.01909e-05	45.87	9.26445e-06		49.98	2.64931e-05	49.98	2.64931e-05		56.24	9.27172e-05	56.24	9.27172e-05		56.24	0.000324227	56.24	0.000324227		56.4	0.00106281	56.4	0.00106281
45.98	1.01847e-05	45.98	9.25885e-06		50.1	2.64771e-05	50.1	2.64771e-05		56.4	9.30103e-05	56.4	9.30103e-05		56.4	0.000324966	56.4	0.000324966		56.55	0.00106529	56.55	0.00106529
46.08	1.0225e-05	46.08	9.29547e-06		50.23	2.65191e-05	50.23	2.65191e-05		56.56	9.29223e-05	56.56	9.29223e-05		56.56	0.000325633	56.56	0.000325633		56.71	0.00106768	56.71	0.00106768
46.19	1.02379e-05	46.19	9.30718e-06		50.36	2.6543e-05	50.36	2.6543e-05		56.71	9.28134e-05	56.71	9.28134e-05		56.71	0.000326744	56.71	0.000326744		56.87	0.00107008	56.87	0.00107008
46.29	1.02346e-05	46.29	9.3042e-06		50.48	2.64583e-05	50.48	2.64583e-05		56.87	9.32008e-05	56.87	9.32008e-05		56.87	0.00032763	56.87	0.00032763		57.03	0.00107249	57.03	0.00107249
46.4	1.02331e-05	46.4	9.3028e-06		50.61	2.65399e-05	50.61	2.65399e-05		57.03	9.33886e-05	57.03	9.33886e-05		57.03	0.000328479	57.03	0.000328479		57.18	0.00107484	57.18	0.00107484
46.51	1.02803e-05	46.51	9.34573e-06		50.73	2.65172e-05	50.73	2.65172e-05		57.18	9.34053e-05	57.18	9.34053e-05		57.18	0.000329412	57.18	0.000329412		57.34	0.00107726	57.34	0.00107726
46.61	1.02777e-05	46.61	9.34335e-06		50.86	2.66081e-05	50.86	2.66081e-05		57.34	9.35079e-05	57.34	9.35079e-05		57.34	0.000329735	57.34	0.000329735		57.5	0.00107973	57.5	0.00107973
46.72	1.02603e-05	46.72	9.32756e-06		50.98	2.66287e-05	50.98	2.66287e-05		57.5	9.36753e-05	57.5	9.36753e-05		57.5	0.0003303	57.5	0.0003303		57.66	0.00108223	57.66	0.00108223
46.82	1.02661e-05	46.82	9.33279e-06		51.11	2.66517e-05	51.11	2.66517e-05		57.66	9.36764e-05	57.66	9.36764e-05		57.66	0.000331356	57.66	0.000331356		57.81	0.00108478	57.81	0.00108478
46.93	1.03253e-05	46.93	9.38668e-06		51.23	2.67139e-05	51.23	2.67139e-05		57.82	9.41347e-05	57.82	9.41347e-05		57.82	0.000331931	57.82	0.000331931		57.97	0.00108739	57.97	0.00108739
47.03	1.03395e-05	47.03	9.39952e-06		51.36	2.66919e-05	51.36	2.66919e-05		57.97	9.42936e-05	57.97	9.42936e-05		57.97	0.000332546	57.97	0.000332546		58.13	0.00108997	58.13	0.00108997
47.14	1.03206e-05	47.14	9.38239e-06		51.49	2.67328e-05	51.49	2.67328e-05		58.13	9.43353e-05	58.13	9.43353e-05		58.13	0.000333547	58.13	0.000333547		58.29	0.00109258	58.29	0.00109258
47.25	1.03446e-05	47.25	9.40417e-06		51.61	2.66586e-05	51.61	2.66586e-05		58.29	9.48086e-05	58.29	9.48086e-05		58.29	0.000334087	58.29	0.000334087		58.45	0.00109516	58.45	0.00109516
47.35	1.03946e-05	47.35	9.44963e-06		51.74	2.67095e-05	51.74	2.67095e-05		58.45	9.49363e-05	58.45	9.49363e-05		58.45	0.000335109	58.45	0.000335109		58.61	0.00109778	58.61	0.00109778
47.46	1.0404e-05	47.46	9.45821e-06		51.86	2.66532e-05	51.86	2.66532e-05		58.61	9.52989e-05	58.61	9.52989e-05		58.61	0.000335744	58.61	0.000335744		58.77	0.00110043	58.77	0.00110043
47.56	1.03642e-05	47.56	9.422e-06		51.99	2.66381e-05	51.99	2.66381e-05		58.77	9.56228e-05	58.77	9.56228e-05		58.77	0.000336151	58.77	0.000336151		58.93	0.00110311	58.93	0.00110311
47.67	1.03868e-05	47.67	9.4425e-06		52.12	2.65806e-05	52.12	2.65806e-05		58.93	9.5671e-05	58.93	9.5671e-05		58.93	0.000337057	58.93	0.000337057		59.08	0.00110577	59.08	0.00110577
47.78	1.04248e-05	47.78	9.47708e-06		52.24	2.6669e-05	52.24	2.6669e-05		59.08	9.60428e-05	59.08	9.60428e-05		59.08	0.000337573	59.08	0.000337573		59.24	0.00110837	59.24	0.00110837
47.88	1.04231e-05	47.88	9.47558e-06		52.37	2.66249e-05	52.37	2.66249e-05		59.24	9.59529e-05	59.24	9.59529e-05		59.24	0.000338798	59.24	0.000338798		59.4	0.00111089	59.4	0.00111089
47.99	1.04388e-05	47.99	9.48981e-06		52.49	2.6648e-05	52.49	2.6648e-05		59.4	9.62692e-05	59.4	9.62692e-05		59.4	0.000339256	59.4	0.000339256		59.56	0.00111345	59.56	0.00111345
48.09	1.0493e-05	48.09	9.53907e-06		52.62	2.66701e-05	52.62	2.66701e-05		59.56	9.63423e-05	59.56	9.63423e-05		59.56	0.000339947	59.56	0.000339947		59.72	0.00111599	59.72	0.00111599
48.2	1.05026e-05	48.2	9.54779e-06		52.75	2.66588e-05	52.75	2.66588e-05		59.72	9.65545e-05	59.72	9.65545e-05		59.72	0.000340197	59.72	0.000340197		59.88	0.00111856	59.88	0.00111856
48.31	1.05017e-05	48.31	9.547e-06		52.87	2.66857e-05	52.87	2.66857e-05		59.88	9.65721e-05	59.88	9.65721e-05		59.88	0.000341041	59.88	0.000341041		60.04	0.00112111	60.04	0.00112111
48.41	1.04766e-05	48.41	9.5242e-06		53	2.66123e-05	53	2.66123e-05		60.04	9.67847e-05	60.04	9.67847e-05		60.04	0.000341616	60.04	0.000341616		60.2	0.0011237	60.2	0.0011237
48.52	1.05125e-05	48.52	9.55683e-06		53.13	2.66058e-05	53.13	2.66058e-05		60.2	9.69231e-05	60.2	9.69231e-05		60.2	0.000342543	60.2	0.000342543		60.36	0.00112632	60.36	0.00112632
48.62	1.05228e-05	48.62	9.56619e-06		53.25	2.65237e-05	53.25	2.65237e-05		60.36	9.70708e-05	60.36	9.70708e-05		60.36	0.000343485	60.36	0.000343485		60.52	0.00112893	60.52	0.00112893
48.73	1.05149e-05	48.73	9.55903e-06		53.38	2.65707e-05	53.38	2.65707e-05		60.52	9.71799e-05	60.52	9.71799e-05		60.52	0.000344604	60.52	0.000344604		60.69	0.0011315	60.69	0.0011315
48.84	1.05798e-05	48.84	9.61796e-06		53.51	2.65504e-05	53.51	2.65504e-05		60.69	9.72515e-05	60.69	9.72515e-05		60.69	0.000345384	60.69	0.000345384		60.85	0.0011341	60.85	0.0011341
48.94	1.05738e-05	48.94	9.61255e-06		53.63	2.66181e-05	53.63	2.66181e-05		60.85	9.72248e-05	60.85	9.72248e-05		60.85	0.000346046	60.85	0.000346046		61.01	0.00113674	61.01	0.00113674
49.05	1.05896e-05	49.05	9.62687e-06		53.76	2.65538e-05	53.76	2.65538e-05		61.01	9.74998e-05	61.01	9.74998e-05		61.01	0.000346612	61.01	0.000346612		61.17	0.00113931	61.17	0.00113931
49.16	1.05584e-05	49.16	9.59851e-06		53.89	2.65767e-05	53.89	2.65767e-05		61.17	9.74252e-05	61.17	9.74252e-05		61.17	0.00034766	61.17	0.00034766		61.33	0.00114195	61.33	0.00114195
49.26	1.0571e-05	49.26	9.61e-06		54.01	2.65806e-05	54.01	2.65806e-05		61.33	9.76467e-05	61.33	9.76467e-05		61.33	0.00034803	61.33	0.00034803		61.49	0.0011446	61.49	0.0011446
49.37	1.05792e-05	49.37	9.61745e-06		54.14	2.65712e-05	54.14	2.65712e-05		61.49	9.7534e-05	61.49	9.7534e-05		61.49	0.000349018	61.49	0.000349018		61.65	0.00114725	61.65	0.00114725
49.47	1.05434e-05	49.47	9.58489e-06		54.27	2.65946e-05	54.27	2.65946e-05		61.65	9.77959e-05	61.65	9.77959e-05		61.65	0.000349482	61.65	0.000349482		61.82	0.00114987	61.82	0.00114987
49.58	1.0551e-05	49.58	9.59179e-06		54.4	2.65324e-05	54.4	2.65324e-05		61.82	9.79003e-05	61.82	9.79003e-05		61.82	0.000350288	61.82	0.000350288		61.98	0.00115252	61.98	0.00115252
49.69	1.05576e-05	49.69	9.59784e-06		54.52	2.65554e-05	54.52	2.65554e-05		61.98	9.78978e-05	61.98	9.78978e-05		61.98	0.000351131	61.98	0.000351131		62.14	0.00115517	62.14	0.00115517
49.79	1.05186e-05	49.79	9.56238e-06		54.65	2.65091e-05	54.65	2.65091e-05		62.14	9.81159e-05	62.14	9.81159e-05		62.14	0.000351619	62.14	0.000351619		62.3	0.00115789	62.3	0.00115789
49.9	1.05338e-05	49.9	9.57615e-06		54.78	2.65896e-05	54.78	2.65896e-05		62.3	9.81063e-05	62.3	9.81063e-05		62.3	0.000352769	62.3	0.000352769		62.46	0.00116065	62.46	0.00116065
50.01	1.05426e-05	50.01	9.58418e-06		54.91	2.65068e-05	54.91	2.65068e-05		62.47	9.84257e-05	62.47	9.84257e-05		62.47	0.000353189	62.47	0.000353189		62.63	0.0011634	62.63	0.0011634
50.11	1.05628e-05	50.11	9.60252e-06		55.03	2.65931e-05	55.03	2.65931e-05		62.63	9.86594e-05	62.63	9.86594e-05		62.63	0.000353849	62.63	0.000353849		62.79	0.00116615	62.79	0.00116615
50.22	1.0542e-05	50.22	9.58367e-06		55.16	2.65266e-05	55.16	2.65266e-05		62.79	9.8654e-05	62.79	9.8654e-05		62.79	0.000354955	62.79	0.000354955		62.95	0.00116889	62.95	0.00116889
50.32	1.05421e-05	50.32	9.58372e-06		55.29	2.65846e-05	55.29	2.65846e-05		62.95	9.89999e-05	62.95	9.89999e-05		62.95	0.000355564	62.95	0.000355564		63.12	0.00117163	63.12	0.00117163
50.43	1.05986e-05	50.43	9.63506e-06		55.42	2.65699e-05	55.42	2.65699e-05		63.12	9.92071e-05	63.12	9.92071e-05		63.12	0.000356407	63.12	0.000356407		63.28	0.00117435	63.28	0.00117435
50.54	1.0563e-05	50.54	9.60276e-06		55.54	2.65829e-05	55.54	2.65829e-05		63.28	9.91516e-05	63.28	9.91516e-05		63.28	0.000357492	63.28	0.000357492		63.44	0.00117706	63.44	0.00117706
50.64	1.05402e-05	50.64	9.58197e-06		55.67	2.66308e-05	55.67	2.66308e-05		63.45	9.94489e-05	63.45	9.94489e-05		63.45	0.00035811	63.45	0.00035811		63.61	0.00117964	63.61	0.00117964
50.75	1.05668e-05	50.75	9.60617e-06		55.8	2.66389e-05	55.8	2.66389e-05		63.61	9.96053e-05	63.61	9.96053e-05		63.61	0.000358863	63.61	0.000358863		63.77	0.00118227	63.77	0.00118227
50.86	1.05658e-05	50.86	9.60527e-06		55.93	2.67653e-05	55.93	2.67653e-05		63.77	9.96041e-05	63.77	9.96041e-05		63.77	0.000360043	63.77	0.000360043		63.94	0.00118483	63.94	0.00118483
50.96	1.05492e-05	50.96	9.59017e-06		56.06	2.67392e-05	56.06	2.67392e-05		63.94	9.9802e-05	63.94	9.9802e-05		63.94	0.000360693	63.94	0.000360693		64.1	0.00118747	64.1	0.00118747
51.07	1.05484e-05	51.07	9.58945e-06		56.18	2.6825e-05	56.18	2.6825e-05		64.1	0.000100112	64.1	0.000100112		64.1	0.000361024	64.1	0.000361024		64.26	0.0011901	64.26	0.0011901
51.18	1.05451e-05	51.18	9.58645e-06		56.31	2.68043e-05	56.31	2.68043e-05		64.27	0.000100175	64.27	0.000100175		64.27	0.000361851	64.27	0.000361851		64.43	0.00119278	64.43	0.00119278
51.28	1.05291e-05	51.28	9.57189e-06		56.44	2.67737e-05	56.44	2.67737e-05		64.43	0.000100226	64.43	0.000100226		64.43	0.000362666	64.43	0.000362666		64.6	0.00119535	64.6	0.00119535
51.39	1.04955e-05	51.39	9.54138e-06		56.57	2.68449e-05	56.57	2.68449e-05		64.6	0.000100421	64.6	0.000100421		64.6	0.000363046	64.6	0.000363046		64.76	0.00119787	64.76	0.00119787
51.49	1.05124e-05	51.49	9.55674e-06		56.7	2.68309e-05	56.7	2.68309e-05		64.76	0.000100614	64.76	0.000100614		64.76	0.000363659	64.76	0.000363659		64.93	0.00120043	64.93	0.00120043
51.6	1.0502e-05	51.6	9.54724e-06		56.83	2.68817e-05	56.83	2.68817e-05		64.93	0.000100669	64.93	0.000100669		64.93	0.000364157	64.93	0.000364157		65.09	0.00120293	65.09	0.00120293
51.71	1.04834e-05	51.71	9.53033e-06		56.95	2.6855e-05	56.95	2.6855e-05		65.09	0.00010065	65.09	0.00010065		65.09	0.00036505	65.09	0.00036505		65.25	0.00120549	65.25	0.00120549
51.81	1.04989e-05	51.81	9.54446e-06		57.08	2.68587e-05	57.08	2.68587e-05		65.26	0.000100781	65.26	0.000100781		65.26	0.000365677	65.26	0.000365677		65.42	0.0012081	65.42	0.0012081
51.92	1.04655e-05	51.92	9.51405e-06		57.21	2.69477e-05	57.21	2.69477e-05		65.42	0.000101032	65.42	0.000101032		65.42	0.000366345	65.42	0.000366345		65.59	0.00121064	65.59	0.00121064
52.03	1.04537e-05	52.03	9.5034e-06		57.34	2.69164e-05	57.34	2.69164e-05		65.59	0.000101258	65.59	0.000101258		65.59	0.000366831	65.59	0.000366831		65.75	0.00121316	65.75	0.00121316
52.13	1.04089e-05	52.13	9.46262e-06		57.47	2.6992e-05	57.47	2.6992e-05		65.75	0.000101396	65.75	0.000101396		65.75	0.000367459	65.75	0.000367459		65.92	0.00121569	65.92	0.00121569
52.24	1.04719e-05	52.24	9.51994e-06		57.6	2.70449e-05	57.6	2.70449e-05		65.92	0.000101494	65.92	0.000101494		65.92	0.000368286	65.92	0.000368286		66.09	0.00121824	66.09	0.00121824
52.35	1.04647e-05	52.35	9.51335e-06		57.73	2.70268e-05	57.73	2.70268e-05		66.09	0.000101704	66.09	0.000101704		66.09	0.000369095	66.09	0.000369095		66.25	0.0012208	66.25	0.0012208
52.45	1.04601e-05	52.45	9.50919e-06		57.86	2.71063e-05	57.86	2.71063e-05		66.25	0.000101913	66.25	0.000101913		66.25	0.000370044	66.25	0.000370044		66.42	0.0012234	66.42	0.0012234
52.56	1.05053e-05	52.56	9.55028e-06		57.99	2.71922e-05	57.99	2.71922e-05		66.42	0.00010227	66.42	0.00010227		66.42	0.000370847	66.42	0.000370847		66.59	0.00122599	66.59	0.00122599
52.67	1.04946e-05	52.67	9.54056e-06		58.11	2.72232e-05	58.11	2.72232e-05		66.59	0.00010247	66.59	0.00010247		66.59	0.000371438	66.59	0.000371438		66.75	0.00122866	66.75	0.00122866
52.77	1.04915e-05	52.77	9.53772e-06		58.24	2.72811e-05	58.24	2.72811e-05		66.75	0.000102735	66.75	0.000102735		66.75	0.000372164	66.75	0.000372164		66.92	0.0012313	66.92	0.0012313
52.88	1.04982e-05	52.88	9.54383e-06		58.37	2.72645e-05	58.37	2.72645e-05		66.92	0.000102884	66.92	0.000102884		66.92	0.000372682	66.92	0.000372682		67.09	0.00123392	67.09	0.00123392
52.99	1.05224e-05	52.99	9.5658e-06		58.5	2.7275e-05	58.5	2.7275e-05		67.09	0.000103058	67.09	0.000103058		67.09	0.000373578	67.09	0.000373578		67.25	0.00123659	67.25	0.00123659
53.09	1.05078e-05	53.09	9.55258e-06		58.63	2.73787e-05	58.63	2.73787e-05		67.25	0.000103296	67.25	0.000103296		67.25	0.000374139	67.25	0.000374139		67.42	0.00123929	67.42	0.00123929
53.2	1.04939e-05	53.2	9.53989e-06		58.76	2.73146e-05	58.76	2.73146e-05		67.42	0.000103473	67.42	0.000103473		67.42	0.000374843	67.42	0.000374843		67.59	0.001242	67.59	0.001242
53.31	1.05226e-05	53.31	9.56597e-06		58.89	2.73406e-05	58.89	2.73406e-05		67.59	0.000103773	67.59	0.000103773		67.59	0.000375611	67.59	0.000375611		67.76	0.00124478	67.76	0.00124478
53.41	1.05057e-05	53.41	9.55062e-06		59.02	2.74094e-05	59.02	2.74094e-05		67.76	0.000104063	67.76	0.000104063		67.76	0.000376362	67.76	0.000376362		67.93	0.00124759	67.93	0.00124759
53.52	1.04834e-05	53.52	9.5304e-06		59.15	2.73937e-05	59.15	2.73937e-05		67.93	0.000104264	67.93	0.000104264		67.93	0.000376978	67.93	0.000376978		68.09	0.00125049	68.09	0.00125049
53.63	1.05324e-05	53.63	9.57493e-06		59.28	2.73389e-05	59.28	2.73389e-05		68.09	0.00010446	68.09	0.00010446		68.09	0.000377285	68.09	0.000377285		68.26	0.00125342	68.26	0.00125342
53.73	1.05441e-05	53.73	9.58551e-06		59.41	2.74212e-05	59.41	2.74212e-05		68.26	0.000104541	68.26	0.000104541		68.26	0.000378074	68.26	0.000378074		68.43	0.00125633	68.43	0.00125633
53.84	1.05159e-05	53.84	9.55992e-06		59.54	2.74221e-05	59.54	2.74221e-05		68.43	0.000104733	68.43	0.000104733		68.43	0.000378978	68.43	0.000378978		68.6	0.00125924	68.6	0.00125924
53.95	1.0548e-05	53.95	9.58905e-06		59.67	2.73888e-05	59.67	2.73888e-05		68.6	0.00010498	68.6	0.00010498		68.6	0.000379988	68.6	0.000379988		68.77	0.00126214	68.77	0.00126214
54.05	1.05298e-05	54.05	9.57251e-06		59.8	2.74518e-05	59.8	2.74518e-05		68.77	0.000105145	68.77	0.000105145		68.77	0.000380924	68.77	0.000380924		68.94	0.00126503	68.94	0.00126503
54.16	1.05628e-05	54.16	9.60257e-06		59.93	2.74569e-05	59.93	2.74569e-05		68.94	0.000105299	68.94	0.000105299		68.94	0.000381783	68.94	0.000381783		69.11	0.00126801	69.11	0.00126801
54.27	1.05694e-05	54.27	9.60858e-06		60.06	2.74665e-05	60.06	2.74665e-05		69.11	0.000105406	69.11	0.000105406		69.11	0.000382469	69.11	0.000382469		69.28	0.00127097	69.28	0.00127097
54.37	1.05979e-05	54.37	9.63444e-06		60.19	2.75511e-05	60.19	2.75511e-05		69.28	0.000105623	69.28	0.000105623		69.28	0.000383202	69.28	0.000383202		69.45	0.001274	69.45	0.001274
54.48	1.05661e-05	54.48	9.60551e-06		60.32	2.75906e-05	60.32	2.75906e-05		69.45	0.000105839	69.45	0.000105839		69.45	0.000383768	69.45	0.000383768		69.62	0.00127701	69.62	0.00127701
54.59	1.05874e-05	54.59	9.6249e-06		60.45	2.76193e-05	60.45	2.76193e-05		69.62	0.000106107	69.62	0.000106107		69.62	0.000384474	69.62	0.000384474		69.78	0.00128005	69.78	0.00128005
54.69	1.05808e-05	54.69	9.61892e-06		60.58	2.76556e-05	60.58	2.76556e-05		69.79	0.000106201	69.79	0.000106201		69.79	0.000385441	69.79	0.000385441		69.96	0.00128309	69.96	0.00128309
54.8	1.05861e-05	54.8	9.62369e-06		60.71	2.77516e-05	60.71	2.77516e-05		69.96	0.000106357	69.96	0.000106357		69.96	0.000386212	69.96	0.000386212		70.13	0.00128609	70.13	0.00128609
54.91	1.05616e-05	54.91	9.6015e-06		60.84	2.77636e-05	60.84	2.77636e-05		70.13	0.000106543	70.13	0.000106543		70.13	0.000386916	70.13	0.000386916		70.3	0.00128909	70.3	0.00128909
55.01	1.06007e-05	55.01	9.63704e-06		60.97	2.77769e-05	60.97	2.77769e-05		70.3	0.000106764	70.3	0.000106764		70.3	0.000387795	70.3	0.000387795		70.47	0.00129212	70.47	0.00129212
55.12	1.05575e-05	55.12	9.59776e-06		61.1	2.79052e-05	61.1	2.79052e-05		70.47	0.000106898	70.47	0.000106898		70.47	0.000388406	70.47	0.000388406		70.64	0.00129511	70.64	0.00129511
55.23	1.055e-05	55.23	9.59094e-06		61.23	2.80339e-05	61.23	2.80339e-05		70.64	0.00010701	70.64	0.00010701		70.64	0.000389169	70.64	0.000389169		70.81	0.00129813	70.81	0.00129813
55.34	1.05482e-05	55.34	9.58926e-06		61.36	2.80133e-05	61.36	2.80133e-05		70.81	0.000107115	70.81	0.000107115		70.81	0.000389858	70.81	0.000389858		70.98	0.00130106	70.98	0.00130106
55.44	1.05554e-05	55.44	9.59582e-06		61.5	2.80419e-05	61.5	2.80419e-05		70.98	0.000107266	70.98	0.000107266		70.98	0.000390986	70.98	0.000390986		71.15	0.00130397	71.15	0.00130397
55.55	1.0551e-05	55.55	9.59178e-06		61.63	2.81363e-05	61.63	2.81363e-05		71.15	0.000107312	71.15	0.000107312		71.15	0.000392103	71.15	0.000392103		71.32	0.00130687	71.32	0.00130687
55.66	1.05424e-05	55.66	9.58398e-06		61.76	2.82353e-05	61.76	2.82353e-05		71.32	0.000107478	71.32	0.000107478		71.32	0.000392515	71.32	0.000392515		71.49	0.00130972	71.49	0.00130972
55.76	1.05347e-05	55.76	9.57704e-06		61.89	2.8217e-05	61.89	2.8217e-05		71.5	0.000107835	71.5	0.000107835		71.5	0.000392852	71.5	0.000392852		71.67	0.00131256	71.67	0.00131256
55.87	1.05045e-05	55.87	9.54955e-06		62.02	2.81866e-05	62.02	2.81866e-05		71.67	0.000108156	71.67	0.000108156		71.67	0.000393628	71.67	0.000393628		71.84	0.00131544	71.84	0.00131544
55.98	1.05106e-05	55.98	9.55509e-06		62.15	2.82556e-05	62.15	2.82556e-05		71.84	0.000108076	71.84	0.000108076		71.84	0.000394671	71.84	0.000394671		72.01	0.00131829	72.01	0.00131829
56.08	1.05311e-05	56.08	9.57372e-06		62.28	2.82682e-05	62.28	2.82682e-05		72.01	0.000108115	72.01	0.000108115		72.01	0.000395956	72.01	0.000395956		72.18	0.00132109	72.18	0.00132109
56.19	1.04977e-05	56.19	9.54338e-06		62.41	2.83239e-05	62.41	2.83239e-05		72.18	0.0001083	72.18	0.0001083		72.18	0.000396565	72.18	0.000396565		72.36	0.0013239	72.36	0.0013239
56.3	1.04922e-05	56.3	9.53835e-06		62.54	2.83271e-05	62.54	2.83271e-05		72.36	0.00010862	72.36	0.00010862		72.36	0.000396967	72.36	0.000396967		72.53	0.00132672	72.53	0.00132672
56.41	1.05208e-05	56.41	9.56436e-06		62.68	2.83593e-05	62.68	2.83593e-05		72.53	0.00010891	72.53	0.00010891		72.53	0.00039734	72.53	0.00039734		72.7	0.00132954	72.7	0.00132954
56.51	1.04444e-05	56.51	9.49491e-06		62.81	2.84436e-05	62.81	2.84436e-05		72.7	0.000109086	72.7	0.000109086		72.7	0.000398462	72.7	0.000398462		72.88	0.00133238	72.88	0.00133238
56.62	1.04827e-05	56.62	9.52971e-06		62.94	2.85335e-05	62.94	2.85335e-05		72.88	0.000109112	72.88	0.000109112		72.88	0.000399699	72.88	0.000399699		73.05	0.00133518	73.05	0.00133518
56.73	1.05212e-05	56.73	9.56472e-06		63.07	2.85761e-05	63.07	2.85761e-05		73.05	0.000109266	73.05	0.000109266		73.05	0.000399781	73.05	0.000399781		73.22	0.00133791	73.22	0.00133791
56.83	1.05032e-05	56.83	9.54837e-06		63.2	2.85948e-05	63.2	2.85948e-05		73.22	0.000109549	73.22	0.000109549		73.22	0.000400338	73.22	0.000400338		73.4	0.00134064	73.4	0.00134064
56.94	1.05505e-05	56.94	9.59133e-06		63.33	2.86515e-05	63.33	2.86515e-05		73.4	0.000109526	73.4	0.000109526		73.4	0.000401537	73.4	0.000401537		73.57	0.00134331	73.57	0.00134331
57.05	1.05503e-05	57.05	9.5912e-06		63.47	2.87178e-05	63.47	2.87178e-05		73.57	0.000109747	73.57	0.000109747		73.57	0.000402228	73.57	0.000402228		73.74	0.00134595	73.74	0.00134595
57.16	1.05155e-05	57.16	9.55952e-06		63.6	2.87476e-05	63.6	2.87476e-05		73.74	0.000110237	73.74	0.000110237		73.74	0.00040285	73.74	0.00040285		73.92	0.00134857	73.92	0.00134857
57.26	1.05847e-05	57.26	9.62243e-06		63.73	2.88196e-05	63.73	2.88196e-05		73.92	0.000110257	73.92	0.000110257		73.92	0.000403513	73.92	0.000403513		74.09	0.00135121	74.09	0.00135121
57.37	1.05548e-05	57.37	9.59528e-06		63.86	2.88793e-05	63.86	2.88793e-05		74.09	0.00011037	74.09	0.00011037		74.09	0.000404273	74.09	0.000404273		74.27	0.00135388	74.27	0.00135388
57.48	1.05577e-05	57.48	9.59794e-06		63.99	2.89212e-05	63.99	2.89212e-05		74.27	0.000110689	74.27	0.000110689		74.27	0.000404962	74.27	0.000404962		74.44	0.00135654	74.44	0.00135654
57.58	1.061e-05	57.58	9.64544e-06		64.13	2.90078e-05	64.13	2.90078e-05		74.44	0.000110868	74.44	0.000110868		74.44	0.000405653	74.44	0.000405653		74.62	0.00135915	74.62	0.00135915
57.69	1.0592e-05	57.69	9.62912e-06		64.26	2.90364e-05	64.26	2.90364e-05		74.62	0.000110954	74.62	0.000110954		74.62	0.000406281	74.62	0.000406281		74.79	0.00136179	74.79	0.00136179
57.8	1.0594e-05	57.8	9.63088e-06		64.39	2.90215e-05	64.39	2.90215e-05		74.79	0.000111141	74.79	0.000111141		74.79	0.000406785	74.79	0.000406785		74.96	0.00136445	74.96	0.00136445
57.91	1.06388e-05	57.91	9.67163e-06		64.52	2.90688e-05	64.52	2.90688e-05		74.97	0.000111424	74.97	0.000111424		74.97	0.000407874	74.97	0.000407874		75.14	0.00136707	75.14	0.00136707
58.01	1.06382e-05	58.01	9.67108e-06		64.65	2.91678e-05	64.65	2.91678e-05		75.14	0.00011155	75.14	0.00011155		75.14	0.000408595	75.14	0.000408595		75.32	0.00136969	75.32	0.00136969
58.12	1.06649e-05	58.12	9.69539e-06		64.79	2.92238e-05	64.79	2.92238e-05		75.32	0.000111886	75.32	0.000111886		75.32	0.000408733	75.32	0.000408733		75.49	0.00137241	75.49	0.00137241
58.23	1.06705e-05	58.23	9.70045e-06		64.92	2.9336e-05	64.92	2.9336e-05		75.49	0.000111834	75.49	0.000111834		75.49	0.000410219	75.49	0.000410219		75.67	0.00137513	75.67	0.00137513
58.34	1.06549e-05	58.34	9.68629e-06		65.05	2.93594e-05	65.05	2.93594e-05		75.67	0.000112169	75.67	0.000112169		75.67	0.000410615	75.67	0.000410615		75.84	0.00137786	75.84	0.00137786
58.44	1.06973e-05	58.44	9.72485e-06		65.19	2.94209e-05	65.19	2.94209e-05		75.84	0.000112378	75.84	0.000112378		75.84	0.000411365	75.84	0.000411365		76.02	0.00138062	76.02	0.00138062
58.55	1.0725e-05	58.55	9.75004e-06		65.32	2.94216e-05	65.32	2.94216e-05		76.02	0.000112245	76.02	0.000112245		76.02	0.000411735	76.02	0.000411735		76.2	0.00138346	76.2	0.00138346
58.66	1.06883e-05	58.66	9.71665e-06		65.45	2.9412e-05	65.45	2.9412e-05		76.2	0.000112572	76.2	0.000112572		76.2	0.000412587	76.2	0.000412587		76.37	0.00138628	76.37	0.00138628
58.76	1.07333e-05	58.76	9.75753e-06		65.58	2.94343e-05	65.58	2.94343e-05		76.37	0.000112412	76.37	0.000112412		76.37	0.000413513	76.37	0.000413513		76.55	0.00138913	76.55	0.00138913
58.87	1.07737e-05	58.87	9.79427e-06		65.72	2.9497e-05	65.72	2.9497e-05		76.55	0.000112759	76.55	0.000112759		76.55	0.000413804	76.55	0.000413804		76.73	0.00139197	76.73	0.00139197
58.98	1.07612e-05	58.98	9.78289e-06		65.85	2.95779e-05	65.85	2.95779e-05		76.73	0.000112596	76.73	0.000112596		76.73	0.000415179	76.73	0.000415179		76.9	0.00139482	76.9	0.00139482
59.09	1.08005e-05	59.09	9.8186e-06		65.98	2.95954e-05	65.98	2.95954e-05		76.9	0.000112961	76.9	0.000112961		76.9	0.000415391	76.9	0.000415391		77.08	0.00139769	77.08	0.00139769
59.19	1.0766e-05	59.19	9.78728e-06		66.12	2.96244e-05	66.12	2.96244e-05		77.08	0.000112917	77.08	0.000112917		77.08	0.000416585	77.08	0.000416585		77.26	0.00140066	77.26	0.00140066
59.3	1.07669e-05	59.3	9.78808e-06		66.25	2.9594e-05	66.25	2.9594e-05		77.26	0.000113269	77.26	0.000113269		77.26	0.000417154	77.26	0.000417154		77.44	0.00140363	77.44	0.00140363
59.41	1.07527e-05	59.41	9.77518e-06		66.38	2.95629e-05	66.38	2.95629e-05		77.44	0.000113115	77.44	0.000113115		77.44	0.000418299	77.44	0.000418299		77.61	0.00140659	77.61	0.00140659
59.52	1.08123e-05	59.52	9.82938e-06		66.52	2.95737e-05	66.52	2.95737e-05		77.61	0.000113515	77.61	0.000113515		77.61	0.000418586	77.61	0.000418586		77.79	0.00140965	77.79	0.00140965
59.62	1.08171e-05	59.62	9.8337e-06		66.65	2.95992e-05	66.65	2.95992e-05		77.79	0.000113615	77.79	0.000113615		77.79	0.000419977	77.79	0.000419977		77.97	0.00141264	77.97	0.00141264
59.73	1.08104e-05	59.73	9.82764e-06		66.78	2.96966e-05	66.78	2.96966e-05		77.97	0.000113959	77.97	0.000113959		77.97	0.000420579	77.97	0.000420579		78.15	0.00141565	78.15	0.00141565
59.84	1.08282e-05	59.84	9.84385e-06		66.92	2.97388e-05	66.92	2.97388e-05		78.15	0.000114107	78.15	0.000114107		78.15	0.000421226	78.15	0.000421226		78.33	0.00141872	78.33	0.00141872
59.95	1.08871e-05	59.95	9.8974e-06		67.05	2.97835e-05	67.05	2.97835e-05		78.33	0.00011444	78.33	0.00011444		78.33	0.000422356	78.33	0.000422356		78.51	0.00142167	78.51	0.00142167
60.05	1.08883e-05	60.05	9.89841e-06		67.18	2.97907e-05	67.18	2.97907e-05		78.51	0.000114635	78.51	0.000114635		78.51	0.000423024	78.51	0.000423024		78.69	0.00142462	78.69	0.00142462
60.16	1.09279e-05	60.16	9.9345e-06		67.32	2.98489e-05	67.32	2.98489e-05		78.69	0.000114789	78.69	0.000114789		78.69	0.00042379	78.69	0.00042379		78.86	0.00142762	78.86	0.00142762
60.27	1.09687e-05	60.27	9.9715e-06		67.45	2.98954e-05	67.45	2.98954e-05		78.86	0.000115237	78.86	0.000115237		78.86	0.000424988	78.86	0.000424988		79.04	0.00143052	79.04	0.00143052
60.38	1.1027e-05	60.38	1.00245e-05		67.59	2.98589e-05	67.59	2.98589e-05		79.04	0.000115268	79.04	0.000115268		79.04	0.000425485	79.04	0.000425485		79.22	0.00143338	79.22	0.00143338
60.48	1.10062e-05	60.48	1.00056e-05		67.72	2.9806e-05	67.72	2.9806e-05		79.22	0.000115549	79.22	0.000115549		79.22	0.000426559	79.22	0.000426559		79.4	0.00143632	79.4	0.00143632
60.59	1.10508e-05	60.59	1.00462e-05		67.85	2.98501e-05	67.85	2.98501e-05		79.4	0.000115919	79.4	0.000115919		79.4	0.000427461	79.4	0.000427461		79.58	0.00143921	79.58	0.00143921
60.7	1.10912e-05	60.7	1.00829e-05		67.99	2.99152e-05	67.99	2.99152e-05		79.58	0.000115949	79.58	0.000115949		79.58	0.000428038	79.58	0.000428038		79.76	0.00144206	79.76	0.00144206
60.81	1.11103e-05	60.81	1.01003e-05		68.12	2.99377e-05	68.12	2.99377e-05		79.76	0.000116284	79.76	0.000116284		79.76	0.000429327	79.76	0.000429327		79.94	0.00144504	79.94	0.00144504
60.91	1.10989e-05	60.91	1.00899e-05		68.26	2.99548e-05	68.26	2.99548e-05		79.94	0.000116568	79.94	0.000116568		79.94	0.000429729	79.94	0.000429729		80.12	0.00144794	80.12	0.00144794
61.02	1.1121e-05	61.02	1.011e-05		68.39	2.99355e-05	68.39	2.99355e-05		80.12	0.000116512	80.12	0.000116512		80.12	0.000430793	80.12	0.000430793		80.3	0.00145093	80.3	0.00145093
61.13	1.11178e-05	61.13	1.01071e-05		68.52	2.99753e-05	68.52	2.99753e-05		80.3	0.000116808	80.3	0.000116808		80.3	0.000432092	80.3	0.000432092		80.48	0.00145381	80.48	0.00145381
61.24	1.11316e-05	61.24	1.01197e-05		68.66	3.01083e-05	68.66	3.01083e-05		80.48	0.000117138	80.48	0.000117138		80.48	0.000432106	80.48	0.000432106		80.67	0.00145673	80.67	0.00145673
61.35	1.11668e-05	61.35	1.01516e-05		68.79	3.01614e-05	68.79	3.01614e-05		80.67	0.000117061	80.67	0.000117061		80.67	0.000433247	80.67	0.000433247		80.85	0.00145977	80.85	0.00145977
61.45	1.11589e-05	61.45	1.01445e-05		68.93	3.0183e-05	68.93	3.0183e-05		80.85	0.000117369	80.85	0.000117369		80.85	0.000434005	80.85	0.000434005		81.03	0.00146276	81.03	0.00146276
61.56	1.11839e-05	61.56	1.01672e-05		69.06	3.02149e-05	69.06	3.02149e-05		81.03	0.000117545	81.03	0.000117545		81.03	0.000434736	81.03	0.000434736		81.21	0.00146592	81.21	0.00146592
61.67	1.11809e-05	61.67	1.01644e-05		69.2	3.03299e-05	69.2	3.03299e-05		81.21	0.000117767	81.21	0.000117767		81.21	0.000435729	81.21	0.000435729		81.39	0.00146902	81.39	0.00146902
61.78	1.12383e-05	61.78	1.02166e-05		69.33	3.04085e-05	69.33	3.04085e-05		81.39	0.000117856	81.39	0.000117856		81.39	0.000436293	81.39	0.000436293		81.57	0.00147218	81.57	0.00147218
61.88	1.1288e-05	61.88	1.02619e-05		69.47	3.04564e-05	69.47	3.04564e-05		81.57	0.00011782	81.57	0.00011782		81.57	0.00043752	81.57	0.00043752		81.75	0.00147534	81.75	0.00147534
61.99	1.12532e-05	61.99	1.02302e-05		69.6	3.04778e-05	69.6	3.04778e-05		81.75	0.000118189	81.75	0.000118189		81.75	0.000438048	81.75	0.000438048		81.94	0.00147835	81.94	0.00147835
62.1	1.13195e-05	62.1	1.02905e-05		69.74	3.05306e-05	69.74	3.05306e-05		81.94	0.000118322	81.94	0.000118322		81.94	0.000438991	81.94	0.000438991		82.12	0.00148144	82.12	0.00148144
62.21	1.1345e-05	62.21	1.03136e-05		69.87	3.06473e-05	69.87	3.06473e-05		82.12	0.00011848	82.12	0.00011848		82.12	0.000439244	82.12	0.000439244		82.3	0.00148432	82.3	0.00148432
62.32	1.13475e-05	62.32	1.03159e-05		70.01	3.06728e-05	70.01	3.06728e-05		82.3	0.000118368	82.3	0.000118368		82.3	0.000440727	82.3	0.000440727		82.48	0.00148723	82.48	0.00148723
62.42	1.13955e-05	62.42	1.03595e-05		70.14	3.07081e-05	70.14	3.07081e-05		82.48	0.000118661	82.48	0.000118661		82.48	0.000441298	82.48	0.000441298		82.67	0.00149006	82.67	0.00149006
62.53	1.13635e-05	62.53	1.03305e-05		70.28	3.07893e-05	70.28	3.07893e-05		82.67	0.000118954	82.67	0.000118954		82.67	0.000442075	82.67	0.000442075		82.85	0.00149301	82.85	0.00149301
62.64	1.13564e-05	62.64	1.0324e-05		70.41	3.07986e-05	70.41	3.07986e-05		82.85	0.000119094	82.85	0.000119094		82.85	0.000442832	82.85	0.000442832		83.03	0.00149591	83.03	0.00149591
62.75	1.13598e-05	62.75	1.03271e-05		70.55	3.07947e-05	70.55	3.07947e-05		83.03	0.000119296	83.03	0.000119296		83.03	0.000443365	83.03	0.000443365		83.22	0.00149872	83.22	0.00149872
62.85	1.13004e-05	62.85	1.0273e-05		70.68	3.07645e-05	70.68	3.07645e-05		83.22	0.000119377	83.22	0.000119377		83.22	0.00044442	83.22	0.00044442		83.4	0.00150156	83.4	0.00150156
62.96	1.13416e-05	62.96	1.03106e-05		70.82	3.07862e-05	70.82	3.07862e-05		83.4	0.000119455	83.4	0.000119455		83.4	0.000444889	83.4	0.000444889		83.59	0.00150431	83.59	0.00150431
63.07	1.13552e-05	63.07	1.03229e-05		70.95	3.07888e-05	70.95	3.07888e-05		83.59	0.000119402	83.59	0.000119402		83.59	0.00044641	83.59	0.00044641		83.77	0.00150717	83.77	0.00150717
63.18	1.13384e-05	63.18	1.03076e-05		71.09	3.07672e-05	71.09	3.07672e-05		83.77	0.000119599	83.77	0.000119599		83.77	0.000446773	83.77	0.000446773		83.95	0.00150989	83.95	0.00150989
63.29	1.13429e-05	63.29	1.03117e-05		71.23	3.06877e-05	71.23	3.06877e-05		83.95	0.000119578	83.95	0.000119578		83.95	0.000447815	83.95	0.000447815		84.14	0.00151275	84.14	0.00151275
63.39	1.13195e-05	63.39	1.02905e-05		71.36	3.06669e-05	71.36	3.06669e-05		84.14	0.000119642	84.14	0.000119642		84.14	0.000448404	84.14	0.000448404		84.32	0.00151546	84.32	0.00151546
63.5	1.13111e-05	63.5	1.02828e-05		71.5	3.06473e-05	71.5	3.06473e-05		84.32	0.000119745	84.32	0.000119745		84.32	0.00044969	84.32	0.00044969		84.51	0.00151832	84.51	0.00151832
63.61	1.13083e-05	63.61	1.02803e-05		71.63	3.05684e-05	71.63	3.05684e-05		84.51	0.000119822	84.51	0.000119822		84.51	0.000450299	84.51	0.000450299		84.69	0.00152093	84.69	0.00152093
63.72	1.13019e-05	63.72	1.02744e-05		71.77	3.04811e-05	71.77	3.04811e-05		84.69	0.000119953	84.69	0.000119953		84.69	0.000451099	84.69	0.000451099		84.88	0.00152363	84.88	0.00152363
63.83	1.13092e-05	63.83	1.02811e-05		71.91	3.0447e-05	71.91	3.0447e-05		84.88	0.000119937	84.88	0.000119937		84.88	0.00045162	84.88	0.00045162		85.06	0.0015262	85.06	0.0015262
63.93	1.12375e-05	63.93	1.02159e-05		72.04	3.04211e-05	72.04	3.04211e-05		85.06	0.000120015	85.06	0.000120015		85.06	0.000452734	85.06	0.000452734		85.25	0.00152889	85.25	0.00152889
64.04	1.12835e-05	64.04	1.02577e-05		72.18	3.0439e-05	72.18	3.0439e-05		85.25	0.000120126	85.25	0.000120126		85.25	0.000453367	85.25	0.000453367		85.43	0.00153153	85.43	0.00153153
64.15	1.12606e-05	64.15	1.02369e-05		72.31	3.04488e-05	72.31	3.04488e-05		85.43	0.000120199	85.43	0.000120199		85.43	0.000454309	85.43	0.000454309		85.62	0.00153426	85.62	0.00153426
64.26	1.12596e-05	64.26	1.0236e-05		72.45	3.0439e-05	72.45	3.0439e-05		85.62	0.000120213	85.62	0.000120213		85.62	0.000454869	85.62	0.000454869		85.8	0.00153683	85.8	0.00153683
64.37	1.12711e-05	64.37	1.02465e-05		72.59	3.04484e-05	72.59	3.04484e-05		85.81	0.000120258	85.81	0.000120258		85.81	0.000455961	85.81	0.000455961		85.99	0.00153947	85.99	0.00153947
64.47	1.12187e-05	64.47	1.01988e-05		72.72	3.04693e-05	72.72	3.04693e-05		85.99	0.000120342	85.99	0.000120342		85.99	0.000456551	85.99	0.000456551		86.18	0.00154223	86.18	0.00154223
64.58	1.12772e-05	64.58	1.0252e-05		72.86	3.04411e-05	72.86	3.04411e-05		86.18	0.000120486	86.18	0.000120486		86.18	0.000457493	86.18	0.000457493		86.37	0.00154511	86.37	0.00154511
64.69	1.12996e-05	64.69	1.02724e-05		73	3.04905e-05	73	3.04905e-05		86.37	0.000120697	86.37	0.000120697		86.37	0.000458232	86.37	0.000458232		86.55	0.00154804	86.55	0.00154804
64.8	1.12909e-05	64.8	1.02645e-05		73.13	3.04259e-05	73.13	3.04259e-05		86.55	0.000120695	86.55	0.000120695		86.55	0.000458869	86.55	0.000458869		86.74	0.00155093	86.74	0.00155093
64.91	1.1322e-05	64.91	1.02928e-05		73.27	3.03751e-05	73.27	3.03751e-05		86.74	0.00012087	86.74	0.00012087		86.74	0.000459915	86.74	0.000459915		86.93	0.00155388	86.93	0.00155388
65.01	1.13285e-05	65.01	1.02986e-05		73.41	3.03589e-05	73.41	3.03589e-05		86.93	0.000120828	86.93	0.000120828		86.93	0.000460533	86.93	0.000460533		87.11	0.00155666	87.11	0.00155666
65.12	1.13083e-05	65.12	1.02802e-05		73.54	3.03855e-05	73.54	3.03855e-05		87.11	0.000120999	87.11	0.000120999		87.11	0.000461847	87.11	0.000461847		87.3	0.00155959	87.3	0.00155959
65.23	1.13474e-05	65.23	1.03158e-05		73.68	3.03998e-05	73.68	3.03998e-05		87.3	0.000120993	87.3	0.000120993		87.3	0.000462166	87.3	0.000462166		87.49	0.00156243	87.49	0.00156243
65.34	1.13148e-05	65.34	1.02862e-05		73.82	3.03834e-05	73.82	3.03834e-05		87.49	0.000121223	87.49	0.000121223		87.49	0.000463019	87.49	0.000463019		87.68	0.0015654	87.68	0.0015654
65.45	1.13125e-05	65.45	1.02841e-05		73.95	3.04381e-05	73.95	3.04381e-05		87.68	0.000121435	87.68	0.000121435		87.68	0.000463406	87.68	0.000463406		87.86	0.00156821	87.86	0.00156821
65.56	1.13115e-05	65.56	1.02832e-05		74.09	3.05142e-05	74.09	3.05142e-05		87.86	0.000121747	87.86	0.000121747		87.86	0.000464261	87.86	0.000464261		88.05	0.00157119	88.05	0.00157119
65.66	1.12879e-05	65.66	1.02617e-05		74.23	3.04769e-05	74.23	3.04769e-05		88.05	0.000122062	88.05	0.000122062		88.05	0.000465212	88.05	0.000465212		88.24	0.00157413	88.24	0.00157413
65.77	1.13413e-05	65.77	1.03103e-05		74.37	3.05171e-05	74.37	3.05171e-05		88.24	0.000122285	88.24	0.000122285		88.24	0.000465899	88.24	0.000465899		88.43	0.00157702	88.43	0.00157702
65.88	1.13117e-05	65.88	1.02834e-05		74.5	3.05192e-05	74.5	3.05192e-05		88.43	0.000122573	88.43	0.000122573		88.43	0.000467255	88.43	0.000467255		88.62	0.00158016	88.62	0.00158016
65.99	1.13518e-05	65.99	1.03198e-05		74.64	3.05218e-05	74.64	3.05218e-05		88.62	0.000122741	88.62	0.000122741		88.62	0.000467731	88.62	0.000467731		88.81	0.00158329	88.81	0.00158329
66.1	1.13634e-05	66.1	1.03304e-05		74.78	3.05286e-05	74.78	3.05286e-05		88.81	0.000123133	88.81	0.000123133		88.81	0.000468428	88.81	0.000468428		89	0.00158656	89	0.00158656
66.21	1.14012e-05	66.21	1.03647e-05		74.92	3.06404e-05	74.92	3.06404e-05		89	0.000123495	89	0.000123495		89	0.000469514	89	0.000469514		89.19	0.00158982	89.19	0.00158982
66.31	1.14108e-05	66.31	1.03734e-05		75.05	3.07234e-05	75.05	3.07234e-05		89.19	0.000123719	89.19	0.000123719		89.19	0.000470188	89.19	0.000470188		89.38	0.00159292	89.38	0.00159292
66.42	1.13968e-05	66.42	1.03608e-05		75.19	3.07156e-05	75.19	3.07156e-05		89.38	0.000123854	89.38	0.000123854		89.38	0.000471343	89.38	0.000471343		89.57	0.00159615	89.57	0.00159615
66.53	1.14392e-05	66.53	1.03992e-05		75.33	3.07495e-05	75.33	3.07495e-05		89.57	0.000124062	89.57	0.000124062		89.57	0.000471758	89.57	0.000471758		89.76	0.00159917	89.76	0.00159917
66.64	1.13902e-05	66.64	1.03547e-05		75.47	3.07354e-05	75.47	3.07354e-05		89.76	0.000124541	89.76	0.000124541		89.76	0.000472262	89.76	0.000472262		89.95	0.00160227	89.95	0.00160227
66.75	1.1427e-05	66.75	1.03882e-05		75.6	3.06998e-05	75.6	3.06998e-05		89.95	0.00012462	89.95	0.00012462		89.95	0.000473715	89.95	0.000473715		90.14	0.00160544	90.14	0.00160544
66.86	1.14722e-05	66.86	1.04293e-05		75.74	3.07445e-05	75.74	3.07445e-05		90.14	0.00012461	90.14	0.00012461		90.14	0.000474395	90.14	0.000474395		90.33	0.00160844	90.33	0.00160844
66.96	1.14217e-05	66.96	1.03834e-05		75.88	3.08688e-05	75.88	3.08688e-05		90.33	0.000124967	90.33	0.000124967		90.33	0.000474968	90.33	0.000474968		90.52	0.00161163	90.52	0.00161163
67.07	1.14689e-05	67.07	1.04263e-05		76.02	3.09125e-05	76.02	3.09125e-05		90.52	0.000125122	90.52	0.000125122		90.52	0.000476027	90.52	0.000476027		90.71	0.00161483	90.71	0.00161483
67.18	1.14331e-05	67.18	1.03937e-05		76.16	3.08993e-05	76.16	3.08993e-05		90.71	0.000125186	90.71	0.000125186		90.71	0.000477172	90.71	0.000477172		90.9	0.00161787	90.9	0.00161787
67.29	1.14161e-05	67.29	1.03783e-05		76.3	3.09389e-05	76.3	3.09389e-05		90.9	0.000125364	90.9	0.000125364		90.9	0.000477963	90.9	0.000477963		91.09	0.00162102	91.09	0.00162102
67.4	1.14539e-05	67.4	1.04126e-05		76.43	3.09278e-05	76.43	3.09278e-05		91.09	0.000125614	91.09	0.000125614		91.09	0.000479061	91.09	0.000479061		91.28	0.00162406	91.28	0.00162406
67.51	1.14264e-05	67.51	1.03876e-05		76.57	3.09971e-05	76.57	3.09971e-05		91.28	0.000125731	91.28	0.000125731		91.28	0.000479961	91.28	0.000479961		91.47	0.00162706	91.47	0.00162706
67.61	1.14652e-05	67.61	1.04229e-05		76.71	3.10922e-05	76.71	3.10922e-05		91.48	0.000125939	91.48	0.000125939		91.48	0.000480733	91.48	0.000480733		91.67	0.0016302	91.67	0.0016302
67.72	1.14617e-05	67.72	1.04198e-05		76.85	3.11361e-05	76.85	3.11361e-05		91.67	0.00012628	91.67	0.00012628		91.67	0.000481813	91.67	0.000481813		91.86	0.0016333	91.86	0.0016333
67.83	1.14798e-05	67.83	1.04362e-05		76.99	3.11347e-05	76.99	3.11347e-05		91.86	0.000126382	91.86	0.000126382		91.86	0.000482364	91.86	0.000482364		92.05	0.0016363	92.05	0.0016363
67.94	1.1507e-05	67.94	1.04609e-05		77.13	3.11386e-05	77.13	3.11386e-05		92.05	0.000126721	92.05	0.000126721		92.05	0.000483067	92.05	0.000483067		92.24	0.00163946	92.24	0.00163946
68.05	1.14974e-05	68.05	1.04521e-05		77.27	3.11743e-05	77.27	3.11743e-05		92.24	0.000126881	92.24	0.000126881		92.24	0.00048431	92.24	0.00048431		92.44	0.00164266	92.44	0.00164266
68.16	1.15186e-05	68.16	1.04715e-05		77.4	3.12122e-05	77.4	3.12122e-05		92.44	0.000127094	92.44	0.000127094		92.44	0.0004848	92.44	0.0004848		92.63	0.00164582	92.63	0.00164582
68.27	1.14808e-05	68.27	1.04371e-05		77.54	3.12631e-05	77.54	3.12631e-05		92.63	0.000127418	92.63	0.000127418		92.63	0.000485489	92.63	0.000485489		92.82	0.0016492	92.82	0.0016492
68.37	1.15058e-05	68.37	1.04598e-05		77.68	3.12721e-05	77.68	3.12721e-05		92.82	0.000127482	92.82	0.000127482		92.82	0.000486753	92.82	0.000486753		93.02	0.00165257	93.02	0.00165257
68.48	1.14887e-05	68.48	1.04443e-05		77.82	3.12702e-05	77.82	3.12702e-05		93.02	0.000127963	93.02	0.000127963		93.02	0.000487017	93.02	0.000487017		93.21	0.00165575	93.21	0.00165575
68.59	1.14944e-05	68.59	1.04494e-05		77.96	3.1379e-05	77.96	3.1379e-05		93.21	0.000128071	93.21	0.000128071		93.21	0.000487941	93.21	0.000487941		93.4	0.00165896	93.4	0.00165896
68.7	1.14948e-05	68.7	1.04498e-05		78.1	3.143e-05	78.1	3.143e-05		93.4	0.000128471	93.4	0.000128471		93.4	0.000488654	93.4	0.000488654		93.6	0.0016622	93.6	0.0016622
68.81	1.14827e-05	68.81	1.04388e-05		78.24	3.1396e-05	78.24	3.1396e-05		93.6	0.000128678	93.6	0.000128678		93.6	0.000489717	93.6	0.000489717		93.79	0.0016654	93.79	0.0016654
68.92	1.15057e-05	68.92	1.04598e-05		78.38	3.14316e-05	78.38	3.14316e-05		93.79	0.000128963	93.79	0.000128963		93.79	0.000490046	93.79	0.000490046		93.99	0.0016685	93.99	0.0016685
69.03	1.15254e-05	69.03	1.04777e-05		78.52	3.14952e-05	78.52	3.14952e-05		93.99	0.000129083	93.99	0.000129083		93.99	0.000491044	93.99	0.000491044		94.18	0.00167168	94.18	0.00167168
69.13	1.15325e-05	69.13	1.04841e-05		78.66	3.16065e-05	78.66	3.16065e-05		94.18	0.000129455	94.18	0.000129455		94.18	0.000491865	94.18	0.000491865		94.38	0.0016749	94.38	0.0016749
69.24	1.15116e-05	69.24	1.04651e-05		78.8	3.15713e-05	78.8	3.15713e-05		94.38	0.000129578	94.38	0.000129578		94.38	0.000493111	94.38	0.000493111		94.57	0.00167803	94.57	0.00167803
69.35	1.15319e-05	69.35	1.04836e-05		78.94	3.15454e-05	78.94	3.15454e-05		94.57	0.000129989	94.57	0.000129989		94.57	0.000493251	94.57	0.000493251		94.76	0.00168119	94.76	0.00168119
69.46	1.15557e-05	69.46	1.05052e-05		79.08	3.15417e-05	79.08	3.15417e-05		94.77	0.000129901	94.77	0.000129901		94.77	0.000494386	94.77	0.000494386		94.96	0.00168445	94.96	0.00168445
69.57	1.15698e-05	69.57	1.0518e-05		79.22	3.16321e-05	79.22	3.16321e-05		94.96	0.000130351	94.96	0.000130351		94.96	0.000495104	94.96	0.000495104		95.16	0.00168769	95.16	0.00168769
69.68	1.15866e-05	69.68	1.05333e-05		79.36	3.15623e-05	79.36	3.15623e-05		95.16	0.000130449	95.16	0.000130449		95.16	0.000496003	95.16	0.000496003		95.35	0.00169071	95.35	0.00169071
69.79	1.15756e-05	69.79	1.05233e-05		79.49	3.15334e-05	79.49	3.15334e-05		95.35	0.000130839	95.35	0.000130839		95.35	0.000496549	95.35	0.000496549		95.55	0.00169375	95.55	0.00169375
69.9	1.16027e-05	69.9	1.05479e-05		79.63	3.16621e-05	79.63	3.16621e-05		95.55	0.000130829	95.55	0.000130829		95.55	0.000497353	95.55	0.000497353		95.74	0.00169678	95.74	0.00169678
70	1.16435e-05	70	1.0585e-05		79.77	3.16281e-05	79.77	3.16281e-05		95.74	0.000130995	95.74	0.000130995		95.74	0.00049851	95.74	0.00049851		95.94	0.00169983	95.94	0.00169983
70.11	1.16397e-05	70.11	1.05816e-05		79.91	3.16013e-05	79.91	3.16013e-05		95.94	0.000131373	95.94	0.000131373		95.94	0.000498913	95.94	0.000498913		96.14	0.00170274	96.14	0.00170274
70.22	1.16718e-05	70.22	1.06107e-05		80.06	3.16556e-05	80.06	3.16556e-05		96.14	0.000131297	96.14	0.000131297		96.14	0.00049946	96.14	0.00049946		96.33	0.0017056	96.33	0.0017056
70.33	1.16285e-05	70.33	1.05714e-05		80.2	3.17102e-05	80.2	3.17102e-05		96.33	0.000131474	96.33	0.000131474		96.33	0.000500313	96.33	0.000500313		96.53	0.00170857	96.53	0.00170857
70.44	1.16907e-05	70.44	1.06279e-05		80.34	3.16701e-05	80.34	3.16701e-05		96.53	0.000131592	96.53	0.000131592		96.53	0.000501019	96.53	0.000501019		96.73	0.00171158	96.73	0.00171158
70.55	1.16812e-05	70.55	1.06193e-05		80.48	3.17536e-05	80.48	3.17536e-05		96.73	0.000131468	96.73	0.000131468		96.73	0.000502299	96.73	0.000502299		96.92	0.00171457	96.92	0.00171457
70.66	1.17052e-05	70.66	1.06411e-05		80.62	3.17747e-05	80.62	3.17747e-05		96.92	0.000131661	96.92	0.000131661		96.92	0.000503106	96.92	0.000503106		97.12	0.00171747	97.12	0.00171747
70.77	1.17063e-05	70.77	1.06421e-05		80.76	3.18253e-05	80.76	3.18253e-05		97.12	0.000131729	97.12	0.000131729		97.12	0.000503359	97.12	0.000503359		97.32	0.00172043	97.32	0.00172043
70.88	1.17807e-05	70.88	1.07097e-05		80.9	3.17949e-05	80.9	3.17949e-05		97.32	0.000131687	97.32	0.000131687		97.32	0.00050431	97.32	0.00050431		97.52	0.00172343	97.52	0.00172343
70.98	1.18217e-05	70.98	1.0747e-05		81.04	3.18935e-05	81.04	3.18935e-05		97.52	0.000131823	97.52	0.000131823		97.52	0.000505485	97.52	0.000505485		97.71	0.00172644	97.71	0.00172644
71.09	1.17771e-05	71.09	1.07065e-05		81.18	3.1905e-05	81.18	3.1905e-05		97.72	0.000132099	97.72	0.000132099		97.72	0.000506273	97.72	0.000506273		97.91	0.00172949	97.91	0.00172949
71.2	1.1828e-05	71.2	1.07527e-05		81.32	3.18909e-05	81.32	3.18909e-05		97.91	0.000132034	97.91	0.000132034		97.91	0.000507149	97.91	0.000507149		98.11	0.00173259	98.11	0.00173259
71.31	1.17713e-05	71.31	1.07012e-05		81.46	3.19991e-05	81.46	3.19991e-05		98.11	0.000131904	98.11	0.000131904		98.11	0.000508266	98.11	0.000508266		98.31	0.00173568	98.31	0.00173568
71.42	1.18149e-05	71.42	1.07409e-05		81.6	3.20664e-05	81.6	3.20664e-05		98.31	0.000132123	98.31	0.000132123		98.31	0.000509161	98.31	0.000509161		98.51	0.00173878	98.51	0.00173878
71.53	1.17822e-05	71.53	1.07111e-05		81.74	3.20825e-05	81.74	3.20825e-05		98.51	0.000132399	98.51	0.000132399		98.51	0.000509542	98.51	0.000509542		98.71	0.00174195	98.71	0.00174195
71.64	1.17969e-05	71.64	1.07244e-05		81.88	3.22042e-05	81.88	3.22042e-05		98.71	0.000132558	98.71	0.000132558		98.71	0.000510308	98.71	0.000510308		98.91	0.00174518	98.91	0.00174518
71.75	1.17475e-05	71.75	1.06796e-05		82.02	3.22142e-05	82.02	3.22142e-05		98.91	0.000132392	98.91	0.000132392		98.91	0.000511704	98.91	0.000511704		99.11	0.00174846	99.11	0.00174846
71.86	1.1747e-05	71.86	1.06791e-05		82.17	3.21886e-05	82.17	3.21886e-05		99.11	0.000132416	99.11	0.000132416		99.11	0.000512423	99.11	0.000512423		99.31	0.00175176	99.31	0.00175176
71.96	1.17154e-05	71.96	1.06504e-05		82.31	3.23942e-05	82.31	3.23942e-05		99.31	0.000132625	99.31	0.000132625		99.31	0.000513324	99.31	0.000513324		99.51	0.00175504	99.51	0.00175504
72.07	1.16748e-05	72.07	1.06135e-05		82.45	3.23415e-05	82.45	3.23415e-05		99.51	0.000132747	99.51	0.000132747		99.51	0.000513934	99.51	0.000513934		99.71	0.0017583	99.71	0.0017583
72.18	1.16837e-05	72.18	1.06215e-05		82.59	3.23855e-05	82.59	3.23855e-05		99.71	0.000132904	99.71	0.000132904		99.71	0.000514571	99.71	0.000514571		99.91	0.00176155	99.91	0.00176155
72.29	1.16524e-05	72.29	1.05931e-05		82.73	3.2427e-05	82.73	3.2427e-05		99.91	0.000133029	99.91	0.000133029		99.91	0.000515327	99.91	0.000515327		100.1	0.00176487	100.1	0.00176487
72.4	1.16719e-05	72.4	1.06108e-05		82.87	3.23407e-05	82.87	3.23407e-05		100.1	0.000133009	100.1	0.000133009		100.1	0.000516602	100.1	0.000516602		100.3	0.00176825	100.3	0.00176825
72.51	1.16298e-05	72.51	1.05725e-05		83.01	3.2477e-05	83.01	3.2477e-05		100.3	0.000133095	100.3	0.000133095		100.3	0.000517743	100.3	0.000517743		100.5	0.00177163	100.5	0.00177163
72.62	1.1644e-05	72.62	1.05854e-05		83.16	3.24483e-05	83.16	3.24483e-05		100.5	0.000133178	100.5	0.000133178		100.5	0.000518721	100.5	0.000518721		100.7	0.00177505	100.7	0.00177505
72.73	1.15946e-05	72.73	1.05405e-05		83.3	3.24748e-05	83.3	3.24748e-05		100.7	0.000133319	100.7	0.000133319		100.7	0.000519741	100.7	0.000519741		100.9	0.00177848	100.9	0.00177848
72.84	1.16478e-05	72.84	1.05889e-05		83.44	3.2576e-05	83.44	3.2576e-05		100.9	0.00013353	100.9	0.00013353		100.9	0.000520592	100.9	0.000520592		101.1	0.00178188	101.1	0.00178188
72.95	1.16147e-05	72.95	1.05588e-05		83.58	3.25055e-05	83.58	3.25055e-05		101.1	0.000133821	101.1	0.000133821		101.1	0.000521462	101.1	0.000521462		101.3	0.00178534	101.3	0.00178534
73.06	1.15879e-05	73.06	1.05344e-05		83.72	3.25894e-05	83.72	3.25894e-05		101.3	0.000133997	101.3	0.000133997		101.3	0.000522398	101.3	0.000522398		101.5	0.00178868	101.5	0.00178868
73.17	1.15945e-05	73.17	1.05405e-05		83.87	3.25981e-05	83.87	3.25981e-05		101.5	0.000134248	101.5	0.000134248		101.5	0.000522935	101.5	0.000522935		101.7	0.00179203	101.7	0.00179203
73.27	1.16358e-05	73.27	1.0578e-05		84.01	3.26141e-05	84.01	3.26141e-05		101.7	0.000134293	101.7	0.000134293		101.7	0.000523651	101.7	0.000523651		101.9	0.00179545	101.9	0.00179545
73.38	1.16098e-05	73.38	1.05544e-05		84.15	3.26776e-05	84.15	3.26776e-05		101.9	0.000134408	101.9	0.000134408		101.9	0.000524596	101.9	0.000524596		102.1	0.00179887	102.1	0.00179887
73.49	1.16006e-05	73.49	1.0546e-05		84.29	3.2566e-05	84.29	3.2566e-05		102.1	0.00013464	102.1	0.00013464		102.1	0.000525436	102.1	0.000525436		102.3	0.00180229	102.3	0.00180229
73.6	1.16052e-05	73.6	1.05501e-05		84.43	3.26799e-05	84.43	3.26799e-05		102.3	0.000134733	102.3	0.000134733		102.3	0.000526243	102.3	0.000526243		102.5	0.00180572	102.5	0.00180572
73.71	1.15876e-05	73.71	1.05342e-05		84.58	3.25698e-05	84.58	3.25698e-05		102.5	0.000135058	102.5	0.000135058		102.5	0.000527069	102.5	0.000527069		102.7	0.00180914	102.7	0.00180914
73.82	1.16335e-05	73.82	1.05759e-05		84.72	3.26505e-05	84.72	3.26505e-05		102.7	0.00013517	102.7	0.00013517		102.7	0.000528165	102.7	0.000528165		102.9	0.00181256	102.9	0.00181256
73.93	1.16285e-05	73.93	1.05714e-05		84.86	3.26208e-05	84.86	3.26208e-05		102.9	0.000135327	102.9	0.000135327		102.9	0.00052904	102.9	0.00052904		103.1	0.00181595	103.1	0.00181595
74.04	1.16435e-05	74.04	1.0585e-05		85.01	3.26195e-05	85.01	3.26195e-05		103.1	0.000135478	103.1	0.000135478		103.1	0.000530013	103.1	0.000530013		103.3	0.00181928	103.3	0.00181928
74.15	1.16361e-05	74.15	1.05782e-05		85.15	3.26731e-05	85.15	3.26731e-05		103.3	0.000135682	103.3	0.000135682		103.3	0.000530928	103.3	0.000530928		103.5	0.00182261	103.5	0.00182261
74.26	1.16478e-05	74.26	1.05889e-05		85.29	3.25888e-05	85.29	3.25888e-05		103.5	0.000135971	103.5	0.000135971		103.5	0.000531982	103.5	0.000531982		103.7	0.00182592	103.7	0.00182592
74.37	1.16505e-05	74.37	1.05914e-05		85.43	3.26914e-05	85.43	3.26914e-05		103.7	0.000136343	103.7	0.000136343		103.7	0.000533188	103.7	0.000533188		104	0.00182921	104	0.00182921
74.48	1.16393e-05	74.48	1.05812e-05		85.58	3.25937e-05	85.58	3.25937e-05		104	0.000136598	104	0.000136598		104	0.000533964	104	0.000533964		104.2	0.00183249	104.2	0.00183249
74.59	1.16645e-05	74.59	1.06041e-05		85.72	3.27071e-05	85.72	3.27071e-05		104.2	0.00013684	104.2	0.00013684		104.2	0.000535032	104.2	0.000535032		104.4	0.00183578	104.4	0.00183578
74.69	1.16454e-05	74.69	1.05867e-05		85.86	3.26714e-05	85.86	3.26714e-05		104.4	0.000137188	104.4	0.000137188		104.4	0.000535745	104.4	0.000535745		104.6	0.00183899	104.6	0.00183899
74.8	1.16649e-05	74.8	1.06045e-05		86.01	3.27351e-05	86.01	3.27351e-05		104.6	0.000137466	104.6	0.000137466		104.6	0.000536683	104.6	0.000536683		104.8	0.00184222	104.8	0.00184222
74.91	1.16436e-05	74.91	1.05851e-05		86.15	3.27234e-05	86.15	3.27234e-05		104.8	0.000137858	104.8	0.000137858		104.8	0.000537398	104.8	0.000537398		105	0.00184538	105	0.00184538
75.02	1.16893e-05	75.02	1.06266e-05		86.29	3.27749e-05	86.29	3.27749e-05		105	0.00013812	105	0.00013812		105	0.000538613	105	0.000538613		105.2	0.00184849	105.2	0.00184849
75.13	1.16876e-05	75.13	1.06251e-05		86.44	3.27709e-05	86.44	3.27709e-05		105.2	0.000138313	105.2	0.000138313		105.2	0.000539652	105.2	0.000539652		105.4	0.00185158	105.4	0.00185158
75.24	1.1706e-05	75.24	1.06418e-05		86.58	3.27132e-05	86.58	3.27132e-05		105.4	0.000138441	105.4	0.000138441		105.4	0.000540661	105.4	0.000540661		105.6	0.00185471	105.6	0.00185471
75.35	1.17127e-05	75.35	1.06479e-05		86.72	3.27362e-05	86.72	3.27362e-05		105.6	0.000138733	105.6	0.000138733		105.6	0.000541471	105.6	0.000541471		105.8	0.0018578	105.8	0.0018578
75.46	1.17367e-05	75.46	1.06697e-05		86.87	3.27328e-05	86.87	3.27328e-05		105.8	0.000139033	105.8	0.000139033		105.8	0.000542179	105.8	0.000542179		106	0.00186097	106	0.00186097
75.57	1.17556e-05	75.57	1.06869e-05		87.01	3.27336e-05	87.01	3.27336e-05		106	0.000139424	106	0.000139424		106	0.000543023	106	0.000543023		106.2	0.00186416	106.2	0.00186416
75.68	1.17712e-05	75.68	1.07011e-05		87.15	3.27688e-05	87.15	3.27688e-05		106.2	0.000139674	106.2	0.000139674		106.2	0.000543936	106.2	0.000543936		106.4	0.00186747	106.4	0.00186747
75.79	1.17389e-05	75.79	1.06717e-05		87.3	3.27242e-05	87.3	3.27242e-05		106.4	0.000139723	106.4	0.000139723		106.4	0.000545033	106.4	0.000545033		106.6	0.00187074	106.6	0.00187074
75.9	1.17694e-05	75.9	1.06995e-05		87.44	3.27739e-05	87.44	3.27739e-05		106.6	0.000140108	106.6	0.000140108		106.6	0.000545375	106.6	0.000545375		106.8	0.00187409	106.8	0.00187409
76.01	1.17617e-05	76.01	1.06925e-05		87.58	3.27301e-05	87.58	3.27301e-05		106.8	0.000140289	106.8	0.000140289		106.8	0.00054616	106.8	0.00054616		107	0.00187752	107	0.00187752
76.12	1.17606e-05	76.12	1.06914e-05		87.73	3.27754e-05	87.73	3.27754e-05		107	0.000140365	107	0.000140365		107	0.000547218	107	0.000547218		107.3	0.00188092	107.3	0.00188092
76.23	1.17693e-05	76.23	1.06994e-05		87.87	3.27182e-05	87.87	3.27182e-05		107.3	0.000140443	107.3	0.000140443		107.3	0.000547997	107.3	0.000547997		107.5	0.00188442	107.5	0.00188442
76.34	1.17515e-05	76.34	1.06831e-05		88.02	3.28342e-05	88.02	3.28342e-05		107.5	0.000140702	107.5	0.000140702		107.5	0.000548704	107.5	0.000548704		107.7	0.00188801	107.7	0.00188801
76.45	1.1761e-05	76.45	1.06918e-05		88.16	3.27278e-05	88.16	3.27278e-05		107.7	0.000141018	107.7	0.000141018		107.7	0.000549523	107.7	0.000549523		107.9	0.00189162	107.9	0.00189162
76.56	1.17643e-05	76.56	1.06948e-05		88.31	3.28091e-05	88.31	3.28091e-05		107.9	0.000140946	107.9	0.000140946		107.9	0.000550603	107.9	0.000550603		108.1	0.00189522	108.1	0.00189522
76.67	1.17816e-05	76.67	1.07105e-05		88.45	3.27708e-05	88.45	3.27708e-05		108.1	0.000141334	108.1	0.000141334		108.1	0.000550976	108.1	0.000550976		108.3	0.00189881	108.3	0.00189881
76.78	1.17892e-05	76.78	1.07175e-05		88.59	3.28807e-05	88.59	3.28807e-05		108.3	0.000141454	108.3	0.000141454		108.3	0.000551916	108.3	0.000551916		108.5	0.0019024	108.5	0.0019024
76.89	1.18204e-05	76.89	1.07459e-05		88.74	3.28406e-05	88.74	3.28406e-05		108.5	0.000141373	108.5	0.000141373		108.5	0.000553052	108.5	0.000553052		108.7	0.00190603	108.7	0.00190603
76.99	1.18414e-05	76.99	1.07649e-05		88.88	3.28956e-05	88.88	3.28956e-05		108.7	0.000141753	108.7	0.000141753		108.7	0.00055384	108.7	0.00055384		108.9	0.00190968	108.9	0.00190968
77.1	1.18512e-05	77.1	1.07738e-05		89.03	3.28736e-05	89.03	3.28736e-05		108.9	0.000141714	108.9	0.000141714		108.9	0.000555213	108.9	0.000555213		109.1	0.0019133	109.1	0.0019133
77.21	1.1886e-05	77.21	1.08055e-05		89.17	3.2865e-05	89.17	3.2865e-05		109.1	0.000141954	109.1	0.000141954		109.1	0.000556002	109.1	0.000556002		109.3	0.00191695	109.3	0.00191695
77.32	1.19214e-05	77.32	1.08377e-05		89.32	3.28601e-05	89.32	3.28601e-05		109.3	0.000142337	109.3	0.000142337		109.3	0.000556749	109.3	0.000556749		109.5	0.0019206	109.5	0.0019206
77.43	1.19143e-05	77.43	1.08312e-05		89.46	3.27924e-05	89.46	3.27924e-05		109.5	0.000142451	109.5	0.000142451		109.5	0.000557247	109.5	0.000557247		109.8	0.00192432	109.8	0.00192432
77.54	1.19327e-05	77.54	1.08479e-05		89.61	3.29143e-05	89.61	3.29143e-05		109.8	0.000142894	109.8	0.000142894		109.8	0.000557898	109.8	0.000557898		110	0.00192792	110	0.00192792
77.65	1.19266e-05	77.65	1.08423e-05		89.75	3.27983e-05	89.75	3.27983e-05		110	0.000143067	110	0.000143067		110	0.000558585	110	0.000558585		110.2	0.00193152	110.2	0.00193152
77.76	1.19408e-05	77.76	1.08552e-05		89.9	3.2906e-05	89.9	3.2906e-05		110.2	0.000143438	110.2	0.000143438		110.2	0.000558892	110.2	0.000558892		110.4	0.00193516	110.4	0.00193516
77.87	1.18895e-05	77.87	1.08086e-05		90.04	3.28498e-05	90.04	3.28498e-05		110.4	0.000143316	110.4	0.000143316		110.4	0.000560237	110.4	0.000560237		110.6	0.00193877	110.6	0.00193877
77.98	1.19366e-05	77.98	1.08514e-05		90.19	3.28714e-05	90.19	3.28714e-05		110.6	0.00014369	110.6	0.00014369		110.6	0.000561101	110.6	0.000561101		110.8	0.0019424	110.8	0.0019424
78.09	1.18932e-05	78.09	1.0812e-05		90.33	3.29133e-05	90.33	3.29133e-05		110.8	0.000143767	110.8	0.000143767		110.8	0.000562297	110.8	0.000562297		111	0.00194598	111	0.00194598
78.2	1.19242e-05	78.2	1.08401e-05		90.48	3.2913e-05	90.48	3.2913e-05		111	0.000144069	111	0.000144069		111	0.000562619	111	0.000562619		111.2	0.00194944	111.2	0.00194944
78.31	1.19129e-05	78.31	1.08299e-05		90.62	3.29192e-05	90.62	3.29192e-05		111.2	0.000144087	111.2	0.000144087		111.2	0.000563843	111.2	0.000563843		111.4	0.00195281	111.4	0.00195281
78.42	1.19474e-05	78.42	1.08612e-05		90.77	3.29214e-05	90.77	3.29214e-05		111.4	0.000144563	111.4	0.000144563		111.4	0.000564106	111.4	0.000564106		111.7	0.00195622	111.7	0.00195622
78.53	1.18953e-05	78.53	1.08139e-05		90.92	3.2893e-05	90.92	3.2893e-05		111.7	0.000144692	111.7	0.000144692		111.7	0.000564968	111.7	0.000564968		111.9	0.00195958	111.9	0.00195958
78.64	1.18929e-05	78.64	1.08117e-05		91.06	3.29932e-05	91.06	3.29932e-05		111.9	0.000145001	111.9	0.000145001		111.9	0.000565614	111.9	0.000565614		112.1	0.00196296	112.1	0.00196296
78.75	1.18804e-05	78.75	1.08003e-05		91.21	3.28764e-05	91.21	3.28764e-05		112.1	0.000144989	112.1	0.000144989		112.1	0.000566793	112.1	0.000566793		112.3	0.0019663	112.3	0.0019663
78.86	1.18936e-05	78.86	1.08123e-05		91.35	3.30177e-05	91.35	3.30177e-05		112.3	0.000145127	112.3	0.000145127		112.3	0.000567769	112.3	0.000567769		112.5	0.00196955	112.5	0.00196955
78.97	1.18886e-05	78.97	1.08079e-05		91.5	3.30366e-05	91.5	3.30366e-05		112.5	0.000145227	112.5	0.000145227		112.5	0.000568254	112.5	0.000568254		112.7	0.00197269	112.7	0.00197269
79.08	1.18946e-05	79.08	1.08133e-05		91.64	3.3046e-05	91.64	3.3046e-05		112.7	0.000145138	112.7	0.000145138		112.7	0.000569124	112.7	0.000569124		112.9	0.00197585	112.9	0.00197585
79.19	1.18411e-05	79.19	1.07646e-05		91.79	3.30913e-05	91.79	3.30913e-05		112.9	0.000145564	112.9	0.000145564		112.9	0.000569854	112.9	0.000569854		113.1	0.00197908	113.1	0.00197908
79.3	1.18716e-05	79.3	1.07924e-05		91.94	3.31491e-05	91.94	3.31491e-05		113.1	0.000145645	113.1	0.000145645		113.1	0.000571004	113.1	0.000571004		113.4	0.00198229	113.4	0.00198229
79.41	1.18974e-05	79.41	1.08158e-05		92.08	3.30723e-05	92.08	3.30723e-05		113.4	0.000145556	113.4	0.000145556		113.4	0.000572075	113.4	0.000572075		113.6	0.00198536	113.6	0.00198536
79.52	1.19027e-05	79.52	1.08206e-05		92.23	3.32184e-05	92.23	3.32184e-05		113.6	0.000145757	113.6	0.000145757		113.6	0.000572573	113.6	0.000572573		113.8	0.00198838	113.8	0.00198838
79.63	1.19058e-05	79.63	1.08234e-05		92.38	3.32283e-05	92.38	3.32283e-05		113.8	0.000145851	113.8	0.000145851		113.8	0.000573151	113.8	0.000573151		114	0.00199142	114	0.00199142
79.74	1.19606e-05	79.74	1.08733e-05		92.52	3.32395e-05	92.52	3.32395e-05		114	0.000145948	114	0.000145948		114	0.000574341	114	0.000574341		114.2	0.00199466	114.2	0.00199466
79.85	1.1943e-05	79.85	1.08573e-05		92.67	3.3316e-05	92.67	3.3316e-05		114.2	0.00014637	114.2	0.00014637		114.2	0.000575392	114.2	0.000575392		114.4	0.00199799	114.4	0.00199799
79.96	1.19742e-05	79.96	1.08857e-05		92.82	3.33902e-05	92.82	3.33902e-05		114.4	0.000146469	114.4	0.000146469		114.4	0.000576005	114.4	0.000576005		114.6	0.0020012	114.6	0.0020012
80.07	1.19453e-05	80.07	1.08593e-05		92.96	3.33885e-05	92.96	3.33885e-05		114.7	0.000146398	114.7	0.000146398		114.7	0.000576762	114.7	0.000576762		114.9	0.00200453	114.9	0.00200453
80.18	1.19677e-05	80.18	1.08797e-05		93.11	3.35e-05	93.11	3.35e-05		114.9	0.000146642	114.9	0.000146642		114.9	0.000577728	114.9	0.000577728		115.1	0.002008	115.1	0.002008
80.29	1.1962e-05	80.29	1.08746e-05		93.26	3.35561e-05	93.26	3.35561e-05		115.1	0.000147151	115.1	0.000147151		115.1	0.000578416	115.1	0.000578416		115.3	0.00201144	115.3	0.00201144
80.4	1.20111e-05	80.4	1.09192e-05		93.4	3.35481e-05	93.4	3.35481e-05		115.3	0.000147468	115.3	0.000147468		115.3	0.000579104	115.3	0.000579104		115.5	0.00201461	115.5	0.00201461
80.51	1.20162e-05	80.51	1.09238e-05		93.55	3.36201e-05	93.55	3.36201e-05		115.5	0.000147672	115.5	0.000147672		115.5	0.000579819	115.5	0.000579819		115.7	0.0020179	115.7	0.0020179
80.62	1.20634e-05	80.62	1.09667e-05		93.7	3.3731e-05	93.7	3.3731e-05		115.7	0.000147938	115.7	0.000147938		115.7	0.000580992	115.7	0.000580992		115.9	0.00202143	115.9	0.00202143
80.73	1.20064e-05	80.73	1.09149e-05		93.84	3.37858e-05	93.84	3.37858e-05		115.9	0.000148301	115.9	0.000148301		115.9	0.000582192	115.9	0.000582192		116.2	0.00202489	116.2	0.00202489
80.84	1.20518e-05	80.84	1.09562e-05		93.99	3.38632e-05	93.99	3.38632e-05		116.2	0.000148677	116.2	0.000148677		116.2	0.000582942	116.2	0.000582942		116.4	0.00202832	116.4	0.00202832
80.95	1.20444e-05	80.95	1.09495e-05		94.14	3.40185e-05	94.14	3.40185e-05		116.4	0.000148864	116.4	0.000148864		116.4	0.000583563	116.4	0.000583563		116.6	0.00203177	116.6	0.00203177
81.06	1.20682e-05	81.06	1.09711e-05		94.28	3.4049e-05	94.28	3.4049e-05		116.6	0.000148949	116.6	0.000148949		116.6	0.00058475	116.6	0.00058475		116.8	0.00203516	116.8	0.00203516
81.17	1.20531e-05	81.17	1.09573e-05		94.43	3.41592e-05	94.43	3.41592e-05		116.8	0.000149137	116.8	0.000149137		116.8	0.000586252	116.8	0.000586252		117	0.00203845	117	0.00203845
81.28	1.20802e-05	81.28	1.0982e-05		94.58	3.42908e-05	94.58	3.42908e-05		117	0.000149436	117	0.000149436		117	0.000587111	117	0.000587111		117.2	0.00204171	117.2	0.00204171
81.39	1.2097e-05	81.39	1.09973e-05		94.73	3.44348e-05	94.73	3.44348e-05		117.2	0.000149706	117.2	0.000149706		117.2	0.000588218	117.2	0.000588218		117.5	0.0020451	117.5	0.0020451
81.5	1.21029e-05	81.5	1.10026e-05		94.87	3.44938e-05	94.87	3.44938e-05		117.5	0.000150046	117.5	0.000150046		117.5	0.000589491	117.5	0.000589491		117.7	0.00204846	117.7	0.00204846
81.61	1.21052e-05	81.61	1.10047e-05		95.02	3.46076e-05	95.02	3.46076e-05		117.7	0.000150514	117.7	0.000150514		117.7	0.000590439	117.7	0.000590439		117.9	0.0020518	117.9	0.0020518
81.72	1.21067e-05	81.72	1.10061e-05		95.17	3.46772e-05	95.17	3.46772e-05		117.9	0.000150742	117.9	0.000150742		117.9	0.000591152	117.9	0.000591152		118.1	0.00205521	118.1	0.00205521
81.83	1.21311e-05	81.83	1.10282e-05		95.32	3.48509e-05	95.32	3.48509e-05		118.1	0.000150948	118.1	0.000150948		118.1	0.00059239	118.1	0.00059239		118.3	0.00205871	118.3	0.00205871
81.94	1.21273e-05	81.94	1.10249e-05		95.47	3.49081e-05	95.47	3.49081e-05		118.3	0.000151158	118.3	0.000151158		118.3	0.000593416	118.3	0.000593416		118.6	0.00206211	118.6	0.00206211
82.05	1.21375e-05	82.05	1.10341e-05		95.61	3.49377e-05	95.61	3.49377e-05		118.6	0.000151474	118.6	0.000151474		118.6	0.00059404	118.6	0.00059404		118.8	0.00206557	118.8	0.00206557
82.16	1.21171e-05	82.16	1.10155e-05		95.76	3.50977e-05	95.76	3.50977e-05		118.8	0.000151551	118.8	0.000151551		118.8	0.000595403	118.8	0.000595403		119	0.00206911	119	0.00206911
82.27	1.2149e-05	82.27	1.10445e-05		95.91	3.51366e-05	95.91	3.51366e-05		119	0.000151819	119	0.000151819		119	0.000596487	119	0.000596487		119.2	0.00207255	119.2	0.00207255
82.38	1.21253e-05	82.38	1.1023e-05		96.06	3.51937e-05	96.06	3.51937e-05		119.2	0.000151998	119.2	0.000151998		119.2	0.000597275	119.2	0.000597275		119.4	0.00207611	119.4	0.00207611
82.5	1.2112e-05	82.5	1.10109e-05		96.21	3.52122e-05	96.21	3.52122e-05		119.4	0.000152086	119.4	0.000152086		119.4	0.000598645	119.4	0.000598645		119.7	0.00207967	119.7	0.00207967
82.61	1.21059e-05	82.61	1.10053e-05		96.35	3.53419e-05	96.35	3.53419e-05		119.7	0.000152269	119.7	0.000152269		119.7	0.000599422	119.7	0.000599422		119.9	0.00208317	119.9	0.00208317
82.72	1.2122e-05	82.72	1.102e-05		96.5	3.54228e-05	96.5	3.54228e-05		119.9	0.000152439	119.9	0.000152439		119.9	0.00060019	119.9	0.00060019		120.1	0.00208688	120.1	0.00208688
82.83	1.20905e-05	82.83	1.09914e-05		96.65	3.55421e-05	96.65	3.55421e-05		120.1	0.000152532	120.1	0.000152532		120.1	0.000601547	120.1	0.000601547		120.3	0.00209055	120.3	0.00209055
82.94	1.21263e-05	82.94	1.10239e-05		96.8	3.55407e-05	96.8	3.55407e-05		120.3	0.000152605	120.3	0.000152605		120.3	0.000602172	120.3	0.000602172		120.5	0.0020941	120.5	0.0020941
83.05	1.21193e-05	83.05	1.10175e-05		96.95	3.55747e-05	96.95	3.55747e-05		120.5	0.000152692	120.5	0.000152692		120.5	0.000603481	120.5	0.000603481		120.8	0.00209789	120.8	0.00209789
83.16	1.21471e-05	83.16	1.10428e-05		97.1	3.56679e-05	97.1	3.56679e-05		120.8	0.000152532	120.8	0.000152532		120.8	0.000604721	120.8	0.000604721		121	0.00210157	121	0.00210157
83.27	1.21124e-05	83.27	1.10113e-05		97.25	3.56894e-05	97.25	3.56894e-05		121	0.0001527	121	0.0001527		121	0.000605546	121	0.000605546		121.2	0.00210536	121.2	0.00210536
83.38	1.20937e-05	83.38	1.09943e-05		97.4	3.57705e-05	97.4	3.57705e-05		121.2	0.000152767	121.2	0.000152767		121.2	0.000606907	121.2	0.000606907		121.4	0.00210905	121.4	0.00210905
83.49	1.20837e-05	83.49	1.09852e-05		97.54	3.57498e-05	97.54	3.57498e-05		121.4	0.000152881	121.4	0.000152881		121.4	0.000607411	121.4	0.000607411		121.6	0.00211267	121.6	0.00211267
83.6	1.20853e-05	83.6	1.09867e-05		97.69	3.58366e-05	97.69	3.58366e-05		121.6	0.000153272	121.6	0.000153272		121.6	0.000608277	121.6	0.000608277		121.9	0.00211643	121.9	0.00211643
83.71	1.20839e-05	83.71	1.09853e-05		97.84	3.58914e-05	97.84	3.58914e-05		121.9	0.000153391	121.9	0.000153391		121.9	0.000609451	121.9	0.000609451		122.1	0.00212009	122.1	0.00212009
83.82	1.21044e-05	83.82	1.1004e-05		97.99	3.59545e-05	97.99	3.59545e-05		122.1	0.000153704	122.1	0.000153704		122.1	0.000610096	122.1	0.000610096		122.3	0.00212384	122.3	0.00212384
83.93	1.20989e-05	83.93	1.0999e-05		98.14	3.60453e-05	98.14	3.60453e-05		122.3	0.00015375	122.3	0.00015375		122.3	0.000611624	122.3	0.000611624		122.5	0.00212747	122.5	0.00212747
84.04	1.2107e-05	84.04	1.10063e-05		98.29	3.60725e-05	98.29	3.60725e-05		122.5	0.000153637	122.5	0.000153637		122.5	0.000612435	122.5	0.000612435		122.8	0.00213118	122.8	0.00213118
84.15	1.2143e-05	84.15	1.10391e-05		98.44	3.6103e-05	98.44	3.6103e-05		122.8	0.000153828	122.8	0.000153828		122.8	0.00061357	122.8	0.00061357		123	0.00213493	123	0.00213493
84.26	1.21519e-05	84.26	1.10472e-05		98.59	3.61257e-05	98.59	3.61257e-05		123	0.000153965	123	0.000153965		123	0.000614356	123	0.000614356		123.2	0.00213862	123.2	0.00213862
84.37	1.21826e-05	84.37	1.10751e-05		98.74	3.62111e-05	98.74	3.62111e-05		123.2	0.000154229	123.2	0.000154229		123.2	0.000615328	123.2	0.000615328		123.4	0.00214233	123.4	0.00214233
84.48	1.21708e-05	84.48	1.10644e-05		98.89	3.62819e-05	98.89	3.62819e-05		123.4	0.000154363	123.4	0.000154363		123.4	0.000616461	123.4	0.000616461		123.7	0.00214589	123.7	0.00214589
84.59	1.22101e-05	84.59	1.11001e-05		99.04	3.62697e-05	99.04	3.62697e-05		123.7	0.000154507	123.7	0.000154507		123.7	0.000617051	123.7	0.000617051		123.9	0.00214949	123.9	0.00214949
84.7	1.21687e-05	84.7	1.10624e-05		99.19	3.63072e-05	99.19	3.63072e-05		123.9	0.000155005	123.9	0.000155005		123.9	0.000618113	123.9	0.000618113		124.1	0.00215295	124.1	0.00215295
84.82	1.21712e-05	84.82	1.10648e-05		99.34	3.62738e-05	99.34	3.62738e-05		124.1	0.000155196	124.1	0.000155196		124.1	0.000618997	124.1	0.000618997		124.3	0.00215653	124.3	0.00215653
84.93	1.21781e-05	84.93	1.1071e-05		99.49	3.62676e-05	99.49	3.62676e-05		124.3	0.000155387	124.3	0.000155387		124.3	0.000619991	124.3	0.000619991		124.6	0.00215986	124.6	0.00215986
85.04	1.21821e-05	85.04	1.10746e-05		99.64	3.62737e-05	99.64	3.62737e-05		124.6	0.000155724	124.6	0.000155724		124.6	0.000620398	124.6	0.000620398		124.8	0.00216324	124.8	0.00216324
85.15	1.2173e-05	85.15	1.10664e-05		99.79	3.61919e-05	99.79	3.61919e-05		124.8	0.000155974	124.8	0.000155974		124.8	0.000622021	124.8	0.000622021		125	0.00216657	125	0.00216657
85.26	1.21843e-05	85.26	1.10766e-05		99.94	3.62395e-05	99.94	3.62395e-05		125	0.000156051	125	0.000156051		125	0.000622693	125	0.000622693		125.2	0.00217003	125.2	0.00217003
85.37	1.2205e-05	85.37	1.10955e-05		100.1	3.62326e-05	100.1	3.62326e-05		125.2	0.000156646	125.2	0.000156646		125.2	0.000623641	125.2	0.000623641		125.5	0.00217342	125.5	0.00217342
85.48	1.21762e-05	85.48	1.10693e-05		100.2	3.62356e-05	100.2	3.62356e-05		125.5	0.000156885	125.5	0.000156885		125.5	0.000624485	125.5	0.000624485		125.7	0.0021769	125.7	0.0021769
85.59	1.22148e-05	85.59	1.11043e-05		100.4	3.61683e-05	100.4	3.61683e-05		125.7	0.000157046	125.7	0.000157046		125.7	0.000625711	125.7	0.000625711		125.9	0.00218036	125.9	0.00218036
85.7	1.22159e-05	85.7	1.11054e-05		100.5	3.60694e-05	100.5	3.60694e-05		125.9	0.000157468	125.9	0.000157468		125.9	0.000626327	125.9	0.000626327		126.1	0.00218384	126.1	0.00218384
85.81	1.22521e-05	85.81	1.11383e-05		100.7	3.60749e-05	100.7	3.60749e-05		126.1	0.0001576	126.1	0.0001576		126.1	0.000627839	126.1	0.000627839		126.4	0.00218723	126.4	0.00218723
85.92	1.21962e-05	85.92	1.10874e-05		100.8	3.59719e-05	100.8	3.59719e-05		126.4	0.000157935	126.4	0.000157935		126.4	0.000628253	126.4	0.000628253		126.6	0.00219073	126.6	0.00219073
86.03	1.22514e-05	86.03	1.11377e-05		101	3.59161e-05	101	3.59161e-05		126.6	0.000158023	126.6	0.000158023		126.6	0.000629877	126.6	0.000629877		126.8	0.0021942	126.8	0.0021942
86.14	1.22675e-05	86.14	1.11522e-05		101.1	3.59218e-05	101.1	3.59218e-05		126.8	0.000158129	126.8	0.000158129		126.8	0.000630243	126.8	0.000630243		127	0.0021978	127	0.0021978
86.26	1.22308e-05	86.26	1.11189e-05		101.3	3.58028e-05	101.3	3.58028e-05		127	0.000158392	127	0.000158392		127	0.000632178	127	0.000632178		127.3	0.00220132	127.3	0.00220132
86.37	1.22543e-05	86.37	1.11403e-05		101.4	3.57893e-05	101.4	3.57893e-05		127.3	0.000158409	127.3	0.000158409		127.3	0.000632681	127.3	0.000632681		127.5	0.00220488	127.5	0.00220488
86.48	1.22679e-05	86.48	1.11526e-05		101.6	3.57444e-05	101.6	3.57444e-05		127.5	0.000158822	127.5	0.000158822		127.5	0.000633983	127.5	0.000633983		127.7	0.00220833	127.7	0.00220833
86.59	1.22975e-05	86.59	1.11796e-05		101.7	3.57438e-05	101.7	3.57438e-05		127.7	0.000158551	127.7	0.000158551		127.7	0.000634417	127.7	0.000634417		128	0.00221171	128	0.00221171
86.7	1.22559e-05	86.7	1.11417e-05		101.9	3.58636e-05	101.9	3.58636e-05		128	0.000158618	128	0.000158618		128	0.000635899	128	0.000635899		128.2	0.00221522	128.2	0.00221522
86.81	1.22642e-05	86.81	1.11493e-05		102	3.58237e-05	102	3.58237e-05		128.2	0.000158766	128.2	0.000158766		128.2	0.000636642	128.2	0.000636642		128.4	0.00221874	128.4	0.00221874
86.92	1.22678e-05	86.92	1.11525e-05		102.2	3.58272e-05	102.2	3.58272e-05		128.4	0.000158883	128.4	0.000158883		128.4	0.000637702	128.4	0.000637702		128.6	0.00222231	128.6	0.00222231
87.03	1.22389e-05	87.03	1.11263e-05		102.3	3.58559e-05	102.3	3.58559e-05		128.6	0.000158954	128.6	0.000158954		128.6	0.000638713	128.6	0.000638713		128.9	0.0022259	128.9	0.0022259
87.14	1.22654e-05	87.14	1.11504e-05		102.5	3.58176e-05	102.5	3.58176e-05		128.9	0.000158967	128.9	0.000158967		128.9	0.000639488	128.9	0.000639488		129.1	0.00222943	129.1	0.00222943
87.25	1.22672e-05	87.25	1.1152e-05		102.7	3.58672e-05	102.7	3.58672e-05		129.1	0.000159245	129.1	0.000159245		129.1	0.000640622	129.1	0.000640622		129.3	0.00223309	129.3	0.00223309
87.36	1.2276e-05	87.36	1.116e-05		102.8	3.58866e-05	102.8	3.58866e-05		129.3	0.000159273	129.3	0.000159273		129.3	0.000641109	129.3	0.000641109		129.6	0.00223665	129.6	0.00223665
87.48	1.22707e-05	87.48	1.11552e-05		103	3.58509e-05	103	3.58509e-05		129.6	0.000159605	129.6	0.000159605		129.6	0.000642277	129.6	0.000642277		129.8	0.00224023	129.8	0.00224023
87.59	1.22948e-05	87.59	1.11771e-05		103.1	3.58668e-05	103.1	3.58668e-05		129.8	0.000159746	129.8	0.000159746		129.8	0.000642957	129.8	0.000642957		130	0.00224378	130	0.00224378
87.7	1.22985e-05	87.7	1.11805e-05		103.3	3.58715e-05	103.3	3.58715e-05		130	0.000159858	130	0.000159858		130	0.000643735	130	0.000643735		130.3	0.00224724	130.3	0.00224724
87.81	1.2309e-05	87.81	1.119e-05		103.4	3.58458e-05	103.4	3.58458e-05		130.3	0.000160089	130.3	0.000160089		130.3	0.000644968	130.3	0.000644968		130.5	0.00225082	130.5	0.00225082
87.92	1.22972e-05	87.92	1.11793e-05		103.6	3.59162e-05	103.6	3.59162e-05		130.5	0.000160488	130.5	0.000160488		130.5	0.000645666	130.5	0.000645666		130.7	0.00225431	130.7	0.00225431
88.03	1.23107e-05	88.03	1.11916e-05		103.7	3.5887e-05	103.7	3.5887e-05		130.7	0.000160581	130.7	0.000160581		130.7	0.00064645	130.7	0.00064645		130.9	0.00225782	130.9	0.00225782
88.14	1.23152e-05	88.14	1.11956e-05		103.9	3.58998e-05	103.9	3.58998e-05		130.9	0.000160841	130.9	0.000160841		130.9	0.000647477	130.9	0.000647477		131.2	0.00226126	131.2	0.00226126
88.25	1.22942e-05	88.25	1.11766e-05		104	3.59007e-05	104	3.59007e-05		131.2	0.000161119	131.2	0.000161119		131.2	0.000648241	131.2	0.000648241		131.4	0.00226471	131.4	0.00226471
88.36	1.2289e-05	88.36	1.11718e-05		104.2	3.58571e-05	104.2	3.58571e-05		131.4	0.00016124	131.4	0.00016124		131.4	0.000648725	131.4	0.000648725		131.6	0.00226818	131.6	0.00226818
88.47	1.22812e-05	88.47	1.11647e-05		104.3	3.58745e-05	104.3	3.58745e-05		131.6	0.000161366	131.6	0.000161366		131.6	0.000650458	131.6	0.000650458		131.9	0.00227167	131.9	0.00227167
88.59	1.22789e-05	88.59	1.11626e-05		104.5	3.5953e-05	104.5	3.5953e-05		131.9	0.000161843	131.9	0.000161843		131.9	0.000651047	131.9	0.000651047		132.1	0.00227511	132.1	0.00227511
88.7	1.22561e-05	88.7	1.11419e-05		104.6	3.59786e-05	104.6	3.59786e-05		132.1	0.000161974	132.1	0.000161974		132.1	0.000652152	132.1	0.000652152		132.3	0.0022786	132.3	0.0022786
88.81	1.22979e-05	88.81	1.11799e-05		104.8	3.60212e-05	104.8	3.60212e-05		132.3	0.000162179	132.3	0.000162179		132.3	0.000653136	132.3	0.000653136		132.6	0.00228206	132.6	0.00228206
88.92	1.23014e-05	88.92	1.11831e-05		104.9	3.61011e-05	104.9	3.61011e-05		132.6	0.000162339	132.6	0.000162339		132.6	0.000654108	132.6	0.000654108		132.8	0.00228557	132.8	0.00228557
89.03	1.22523e-05	89.03	1.11385e-05		105.1	3.61244e-05	105.1	3.61244e-05		132.8	0.000162692	132.8	0.000162692		132.8	0.000654927	132.8	0.000654927		133	0.00228916	133	0.00228916
89.14	1.22679e-05	89.14	1.11526e-05		105.2	3.61555e-05	105.2	3.61555e-05		133	0.000163102	133	0.000163102		133	0.000656256	133	0.000656256		133.3	0.00229279	133.3	0.00229279
89.25	1.22456e-05	89.25	1.11323e-05		105.4	3.61904e-05	105.4	3.61904e-05		133.3	0.000163277	133.3	0.000163277		133.3	0.000657131	133.3	0.000657131		133.5	0.00229642	133.5	0.00229642
89.36	1.22641e-05	89.36	1.11492e-05		105.5	3.61541e-05	105.5	3.61541e-05		133.5	0.00016341	133.5	0.00016341		133.5	0.000658036	133.5	0.000658036		133.7	0.00230008	133.7	0.00230008
89.47	1.22063e-05	89.47	1.10966e-05		105.7	3.62174e-05	105.7	3.62174e-05		133.7	0.000163474	133.7	0.000163474		133.7	0.000659569	133.7	0.000659569		134	0.0023037	134	0.0023037
89.59	1.22261e-05	89.59	1.11147e-05		105.9	3.62558e-05	105.9	3.62558e-05		134	0.000163788	134	0.000163788		134	0.000660651	134	0.000660651		134.2	0.00230731	134.2	0.00230731
89.7	1.22308e-05	89.7	1.11189e-05		106	3.62071e-05	106	3.62071e-05		134.2	0.000163866	134.2	0.000163866		134.2	0.000661779	134.2	0.000661779		134.4	0.00231084	134.4	0.00231084
89.81	1.22138e-05	89.81	1.11035e-05		106.2	3.62566e-05	106.2	3.62566e-05		134.4	0.000164079	134.4	0.000164079		134.4	0.000663047	134.4	0.000663047		134.7	0.00231443	134.7	0.00231443
89.92	1.22729e-05	89.92	1.11572e-05		106.3	3.62722e-05	106.3	3.62722e-05		134.7	0.000164462	134.7	0.000164462		134.7	0.000664493	134.7	0.000664493		134.9	0.00231815	134.9	0.00231815
90.03	1.22385e-05	90.03	1.11259e-05		106.5	3.63127e-05	106.5	3.63127e-05		134.9	0.000164608	134.9	0.000164608		134.9	0.00066519	134.9	0.00066519		135.2	0.00232194	135.2	0.00232194
90.14	1.22638e-05	90.14	1.11489e-05		106.6	3.63088e-05	106.6	3.63088e-05		135.2	0.000164832	135.2	0.000164832		135.2	0.000665974	135.2	0.000665974		135.4	0.00232573	135.4	0.00232573
90.25	1.22625e-05	90.25	1.11478e-05		106.8	3.63939e-05	106.8	3.63939e-05		135.4	0.000165052	135.4	0.000165052		135.4	0.000667325	135.4	0.000667325		135.6	0.00232952	135.6	0.00232952
90.37	1.22594e-05	90.37	1.11449e-05		106.9	3.63925e-05	106.9	3.63925e-05		135.6	0.000165221	135.6	0.000165221		135.6	0.000668528	135.6	0.000668528		135.9	0.00233336	135.9	0.00233336
90.48	1.23119e-05	90.48	1.11926e-05		107.1	3.64034e-05	107.1	3.64034e-05		135.9	0.000165507	135.9	0.000165507		135.9	0.000669357	135.9	0.000669357		136.1	0.00233724	136.1	0.00233724
90.59	1.22728e-05	90.59	1.11571e-05		107.2	3.64341e-05	107.2	3.64341e-05		136.1	0.000165709	136.1	0.000165709		136.1	0.000670349	136.1	0.000670349		136.3	0.00234117	136.3	0.00234117
90.7	1.23158e-05	90.7	1.11962e-05		107.4	3.65008e-05	107.4	3.65008e-05		136.3	0.000165957	136.3	0.000165957		136.3	0.000671513	136.3	0.000671513		136.6	0.0023451	136.6	0.0023451
90.81	1.23251e-05	90.81	1.12047e-05		107.5	3.65106e-05	107.5	3.65106e-05		136.6	0.000166274	136.6	0.000166274		136.6	0.00067262	136.6	0.00067262		136.8	0.00234908	136.8	0.00234908
90.92	1.2308e-05	90.92	1.11891e-05		107.7	3.66314e-05	107.7	3.66314e-05		136.8	0.000166472	136.8	0.000166472		136.8	0.000673418	136.8	0.000673418		137	0.002353	137	0.002353
91.03	1.23492e-05	91.03	1.12266e-05		107.8	3.6749e-05	107.8	3.6749e-05		137	0.000166694	137	0.000166694		137	0.000674275	137	0.000674275		137.3	0.00235693	137.3	0.00235693
91.14	1.23524e-05	91.14	1.12294e-05		108	3.68189e-05	108	3.68189e-05		137.3	0.000167044	137.3	0.000167044		137.3	0.000674927	137.3	0.000674927		137.5	0.00236073	137.5	0.00236073
91.26	1.2386e-05	91.26	1.126e-05		108.2	3.69248e-05	108.2	3.69248e-05		137.5	0.000167278	137.5	0.000167278		137.5	0.000676045	137.5	0.000676045		137.8	0.00236456	137.8	0.00236456
91.37	1.23912e-05	91.37	1.12647e-05		108.3	3.70576e-05	108.3	3.70576e-05		137.8	0.000167319	137.8	0.000167319		137.8	0.000676855	137.8	0.000676855		138	0.00236836	138	0.00236836
91.48	1.23749e-05	91.48	1.12499e-05		108.5	3.70924e-05	108.5	3.70924e-05		138	0.000167519	138	0.000167519		138	0.000677526	138	0.000677526		138.2	0.00237205	138.2	0.00237205
91.59	1.24008e-05	91.59	1.12735e-05		108.6	3.70956e-05	108.6	3.70956e-05		138.2	0.000167881	138.2	0.000167881		138.2	0.000678378	138.2	0.000678378		138.5	0.00237575	138.5	0.00237575
91.7	1.2405e-05	91.7	1.12773e-05		108.8	3.71615e-05	108.8	3.71615e-05		138.5	0.000168246	138.5	0.000168246		138.5	0.000679674	138.5	0.000679674		138.7	0.0023795	138.7	0.0023795
91.81	1.24286e-05	91.81	1.12987e-05		108.9	3.72245e-05	108.9	3.72245e-05		138.7	0.000168512	138.7	0.000168512		138.7	0.000680972	138.7	0.000680972		139	0.00238328	139	0.00238328
91.93	1.23966e-05	91.93	1.12697e-05		109.1	3.72572e-05	109.1	3.72572e-05		139	0.000168665	139	0.000168665		139	0.000681823	139	0.000681823		139.2	0.00238705	139.2	0.00238705
92.04	1.24209e-05	92.04	1.12917e-05		109.2	3.73537e-05	109.2	3.73537e-05		139.2	0.000168823	139.2	0.000168823		139.2	0.000682393	139.2	0.000682393		139.4	0.00239086	139.4	0.00239086
92.15	1.24219e-05	92.15	1.12926e-05		109.4	3.73853e-05	109.4	3.73853e-05		139.4	0.000169088	139.4	0.000169088		139.4	0.000683366	139.4	0.000683366		139.7	0.0023947	139.7	0.0023947
92.26	1.24017e-05	92.26	1.12743e-05		109.5	3.73882e-05	109.5	3.73882e-05		139.7	0.000169359	139.7	0.000169359		139.7	0.000684656	139.7	0.000684656		139.9	0.00239867	139.9	0.00239867
92.37	1.24227e-05	92.37	1.12933e-05		109.7	3.74229e-05	109.7	3.74229e-05		139.9	0.000169693	139.9	0.000169693		139.9	0.000685682	139.9	0.000685682		140.2	0.0024027	140.2	0.0024027
92.48	1.24299e-05	92.48	1.12999e-05		109.9	3.75326e-05	109.9	3.75326e-05		140.2	0.000169842	140.2	0.000169842		140.2	0.000686606	140.2	0.000686606		140.4	0.00240676	140.4	0.00240676
92.59	1.24518e-05	92.59	1.13198e-05		110	3.76338e-05	110	3.76338e-05		140.4	0.000170045	140.4	0.000170045		140.4	0.000687492	140.4	0.000687492		140.6	0.00241075	140.6	0.00241075
92.71	1.24385e-05	92.71	1.13078e-05		110.2	3.76151e-05	110.2	3.76151e-05		140.6	0.000170419	140.6	0.000170419		140.6	0.000688675	140.6	0.000688675		140.9	0.00241466	140.9	0.00241466
92.82	1.24648e-05	92.82	1.13316e-05		110.3	3.76122e-05	110.3	3.76122e-05		140.9	0.000170613	140.9	0.000170613		140.9	0.000689866	140.9	0.000689866		141.1	0.00241862	141.1	0.00241862
92.93	1.25069e-05	92.93	1.13699e-05		110.5	3.75935e-05	110.5	3.75935e-05		141.1	0.000170611	141.1	0.000170611		141.1	0.000690503	141.1	0.000690503		141.4	0.00242245	141.4	0.00242245
93.04	1.24681e-05	93.04	1.13346e-05		110.6	3.76542e-05	110.6	3.76542e-05		141.4	0.000170952	141.4	0.000170952		141.4	0.000691759	141.4	0.000691759		141.6	0.00242627	141.6	0.00242627
93.15	1.25073e-05	93.15	1.13702e-05		110.8	3.7685e-05	110.8	3.7685e-05		141.6	0.000171081	141.6	0.000171081		141.6	0.000693194	141.6	0.000693194		141.8	0.00243011	141.8	0.00243011
93.26	1.25081e-05	93.26	1.1371e-05		110.9	3.77285e-05	110.9	3.77285e-05		141.8	0.000170875	141.8	0.000170875		141.8	0.000693946	141.8	0.000693946		142.1	0.00243399	142.1	0.00243399
93.38	1.24945e-05	93.38	1.13586e-05		111.1	3.77619e-05	111.1	3.77619e-05		142.1	0.000171163	142.1	0.000171163		142.1	0.000695281	142.1	0.000695281		142.3	0.00243779	142.3	0.00243779
93.49	1.25191e-05	93.49	1.1381e-05		111.3	3.77207e-05	111.3	3.77207e-05		142.3	0.000171377	142.3	0.000171377		142.3	0.000696677	142.3	0.000696677		142.6	0.00244159	142.6	0.00244159
93.6	1.25014e-05	93.6	1.13649e-05		111.4	3.77536e-05	111.4	3.77536e-05		142.6	0.000171464	142.6	0.000171464		142.6	0.000697732	142.6	0.000697732		142.8	0.00244528	142.8	0.00244528
93.71	1.25614e-05	93.71	1.14195e-05		111.6	3.7888e-05	111.6	3.7888e-05		142.8	0.000171645	142.8	0.000171645		142.8	0.000699239	142.8	0.000699239		143.1	0.00244902	143.1	0.00244902
93.82	1.25304e-05	93.82	1.13913e-05		111.7	3.79152e-05	111.7	3.79152e-05		143.1	0.00017166	143.1	0.00017166		143.1	0.000700241	143.1	0.000700241		143.3	0.00245275	143.3	0.00245275
93.94	1.25272e-05	93.94	1.13884e-05		111.9	3.78564e-05	111.9	3.78564e-05		143.3	0.000171987	143.3	0.000171987		143.3	0.000701456	143.3	0.000701456		143.6	0.00245655	143.6	0.00245655
94.05	1.25519e-05	94.05	1.14108e-05		112	3.79148e-05	112	3.79148e-05		143.6	0.00017214	143.6	0.00017214		143.6	0.00070255	143.6	0.00070255		143.8	0.00246041	143.8	0.00246041
94.16	1.2555e-05	94.16	1.14137e-05		112.2	3.8039e-05	112.2	3.8039e-05		143.8	0.00017235	143.8	0.00017235		143.8	0.000703603	143.8	0.000703603		144	0.00246423	144	0.00246423
94.27	1.25786e-05	94.27	1.14351e-05		112.4	3.80848e-05	112.4	3.80848e-05		144	0.000172476	144	0.000172476		144	0.000704654	144	0.000704654		144.3	0.00246806	144.3	0.00246806
94.38	1.25543e-05	94.38	1.1413e-05		112.5	3.80148e-05	112.5	3.80148e-05		144.3	0.000172568	144.3	0.000172568		144.3	0.000705389	144.3	0.000705389		144.5	0.00247193	144.5	0.00247193
94.49	1.2539e-05	94.49	1.13991e-05		112.7	3.8072e-05	112.7	3.8072e-05		144.5	0.000172818	144.5	0.000172818		144.5	0.000706488	144.5	0.000706488		144.8	0.00247587	144.8	0.00247587
94.61	1.25629e-05	94.61	1.14208e-05		112.8	3.81993e-05	112.8	3.81993e-05		144.8	0.000172952	144.8	0.000172952		144.8	0.000707324	144.8	0.000707324		145	0.0024797	145	0.0024797
94.72	1.25581e-05	94.72	1.14165e-05		113	3.82599e-05	113	3.82599e-05		145	0.000173158	145	0.000173158		145	0.000708144	145	0.000708144		145.3	0.00248351	145.3	0.00248351
94.83	1.25569e-05	94.83	1.14154e-05		113.1	3.81952e-05	113.1	3.81952e-05		145.3	0.000173505	145.3	0.000173505		145.3	0.000709356	145.3	0.000709356		145.5	0.00248734	145.5	0.00248734
94.94	1.26193e-05	94.94	1.14721e-05		113.3	3.82553e-05	113.3	3.82553e-05		145.5	0.000173584	145.5	0.000173584		145.5	0.000709969	145.5	0.000709969		145.8	0.00249115	145.8	0.00249115
95.05	1.25952e-05	95.05	1.14502e-05		113.4	3.82178e-05	113.4	3.82178e-05		145.8	0.000174033	145.8	0.000174033		145.8	0.000711107	145.8	0.000711107		146	0.00249497	146	0.00249497
95.17	1.26359e-05	95.17	1.14872e-05		113.6	3.8114e-05	113.6	3.8114e-05		146	0.000174041	146	0.000174041		146	0.000711576	146	0.000711576		146.3	0.00249879	146.3	0.00249879
95.28	1.26366e-05	95.28	1.14878e-05		113.8	3.80367e-05	113.8	3.80367e-05		146.3	0.000174383	146.3	0.000174383		146.3	0.000712648	146.3	0.000712648		146.5	0.00250264	146.5	0.00250264
95.39	1.26441e-05	95.39	1.14946e-05		113.9	3.80309e-05	113.9	3.80309e-05		146.5	0.000174618	146.5	0.000174618		146.5	0.000713679	146.5	0.000713679		146.7	0.00250659	146.7	0.00250659
95.5	1.26585e-05	95.5	1.15077e-05		114.1	3.80029e-05	114.1	3.80029e-05		146.7	0.000174716	146.7	0.000174716		146.7	0.000714551	146.7	0.000714551		147	0.00251056	147	0.00251056
95.61	1.26374e-05	95.61	1.14886e-05		114.2	3.79915e-05	114.2	3.79915e-05		147	0.000175039	147	0.000175039		147	0.000715837	147	0.000715837		147.2	0.00251447	147.2	0.00251447
95.73	1.26176e-05	95.73	1.14706e-05		114.4	3.80858e-05	114.4	3.80858e-05		147.2	0.000175016	147.2	0.000175016		147.2	0.000716588	147.2	0.000716588		147.5	0.00251832	147.5	0.00251832
95.84	1.26433e-05	95.84	1.1494e-05		114.5	3.80037e-05	114.5	3.80037e-05		147.5	0.000175123	147.5	0.000175123		147.5	0.000717163	147.5	0.000717163		147.7	0.00252226	147.7	0.00252226
95.95	1.26255e-05	95.95	1.14777e-05		114.7	3.80213e-05	114.7	3.80213e-05		147.7	0.00017537	147.7	0.00017537		147.7	0.000718279	147.7	0.000718279		148	0.00252607	148	0.00252607
96.06	1.26301e-05	96.06	1.14819e-05		114.9	3.82021e-05	114.9	3.82021e-05		148	0.000175483	148	0.000175483		148	0.000719161	148	0.000719161		148.2	0.00252981	148.2	0.00252981
96.17	1.26133e-05	96.17	1.14667e-05		115	3.82069e-05	115	3.82069e-05		148.2	0.000175649	148.2	0.000175649		148.2	0.000719834	148.2	0.000719834		148.5	0.00253347	148.5	0.00253347
96.29	1.26176e-05	96.29	1.14706e-05		115.2	3.81893e-05	115.2	3.81893e-05		148.5	0.000175911	148.5	0.000175911		148.5	0.000720615	148.5	0.000720615		148.7	0.0025371	148.7	0.0025371
96.4	1.26152e-05	96.4	1.14683e-05		115.3	3.82596e-05	115.3	3.82596e-05		148.7	0.000176321	148.7	0.000176321		148.7	0.000721898	148.7	0.000721898		149	0.00254073	149	0.00254073
96.51	1.25972e-05	96.51	1.1452e-05		115.5	3.82058e-05	115.5	3.82058e-05		149	0.00017658	149	0.00017658		149	0.000722994	149	0.000722994		149.2	0.00254441	149.2	0.00254441
96.62	1.25907e-05	96.62	1.14461e-05		115.7	3.82208e-05	115.7	3.82208e-05		149.2	0.000176872	149.2	0.000176872		149.2	0.000723696	149.2	0.000723696		149.5	0.00254806	149.5	0.00254806
96.73	1.2625e-05	96.73	1.14772e-05		115.8	3.83202e-05	115.8	3.83202e-05		149.5	0.000177279	149.5	0.000177279		149.5	0.000724571	149.5	0.000724571		149.7	0.00255174	149.7	0.00255174
96.85	1.26513e-05	96.85	1.15012e-05		116	3.8313e-05	116	3.8313e-05		149.7	0.000177687	149.7	0.000177687		149.7	0.000725702	149.7	0.000725702		150	0.00255546	150	0.00255546
96.96	1.26481e-05	96.96	1.14983e-05		116.1	3.83715e-05	116.1	3.83715e-05		150	0.000178103	150	0.000178103		150	0.000726782	150	0.000726782		150.2	0.00255918	150.2	0.00255918
97.07	1.26647e-05	97.07	1.15133e-05		116.3	3.84533e-05	116.3	3.84533e-05		150.2	0.00017825	150.2	0.00017825		150.2	0.000727921	150.2	0.000727921		150.5	0.00256293	150.5	0.00256293
97.18	1.26516e-05	97.18	1.15014e-05		116.4	3.84672e-05	116.4	3.84672e-05		150.5	0.000178506	150.5	0.000178506		150.5	0.000728926	150.5	0.000728926		150.7	0.00256678	150.7	0.00256678
97.3	1.26795e-05	97.3	1.15269e-05		116.6	3.85846e-05	116.6	3.85846e-05		150.7	0.000178793	150.7	0.000178793		150.7	0.00072978	150.7	0.00072978		151	0.00257067	151	0.00257067
97.41	1.26602e-05	97.41	1.15093e-05		116.8	3.8571e-05	116.8	3.8571e-05		151	0.000178978	151	0.000178978		151	0.000730797	151	0.000730797		151.2	0.00257461	151.2	0.00257461
97.52	1.26522e-05	97.52	1.1502e-05		116.9	3.8566e-05	116.9	3.8566e-05		151.2	0.000179284	151.2	0.000179284		151.2	0.000731546	151.2	0.000731546		151.5	0.00257856	151.5	0.00257856
97.63	1.26753e-05	97.63	1.1523e-05		117.1	3.86538e-05	117.1	3.86538e-05		151.5	0.000179467	151.5	0.000179467		151.5	0.000732857	151.5	0.000732857		151.7	0.00258244	151.7	0.00258244
97.74	1.26893e-05	97.74	1.15357e-05		117.2	3.86686e-05	117.2	3.86686e-05		151.7	0.000179735	151.7	0.000179735		151.7	0.000733798	151.7	0.000733798		152	0.00258625	152	0.00258625
97.86	1.26662e-05	97.86	1.15147e-05		117.4	3.87948e-05	117.4	3.87948e-05		152	0.000179983	152	0.000179983		152	0.000734688	152	0.000734688		152.2	0.00259008	152.2	0.00259008
97.97	1.27089e-05	97.97	1.15536e-05		117.6	3.88115e-05	117.6	3.88115e-05		152.2	0.000180119	152.2	0.000180119		152.2	0.000735167	152.2	0.000735167		152.5	0.00259392	152.5	0.00259392
98.08	1.2702e-05	98.08	1.15473e-05		117.7	3.87913e-05	117.7	3.87913e-05		152.5	0.000180285	152.5	0.000180285		152.5	0.00073602	152.5	0.00073602		152.8	0.00259782	152.8	0.00259782
98.19	1.2689e-05	98.19	1.15355e-05		117.9	3.88368e-05	117.9	3.88368e-05		152.8	0.000180345	152.8	0.000180345		152.8	0.000737057	152.8	0.000737057		153	0.00260172	153	0.00260172
98.31	1.26877e-05	98.31	1.15342e-05		118	3.87792e-05	118	3.87792e-05		153	0.000180582	153	0.000180582		153	0.000738046	153	0.000738046		153.3	0.00260568	153.3	0.00260568
98.42	1.26253e-05	98.42	1.14776e-05		118.2	3.88118e-05	118.2	3.88118e-05		153.3	0.000180813	153.3	0.000180813		153.3	0.000739069	153.3	0.000739069		153.5	0.00260958	153.5	0.00260958
98.53	1.26581e-05	98.53	1.15074e-05		118.4	3.87246e-05	118.4	3.87246e-05		153.5	0.000180932	153.5	0.000180932		153.5	0.000740152	153.5	0.000740152		153.8	0.0026135	153.8	0.0026135
98.64	1.26233e-05	98.64	1.14757e-05		118.5	3.87542e-05	118.5	3.87542e-05		153.8	0.000181269	153.8	0.000181269		153.8	0.000740803	153.8	0.000740803		154	0.00261742	154	0.00261742
98.76	1.26253e-05	98.76	1.14775e-05		118.7	3.87323e-05	118.7	3.87323e-05		154	0.000181494	154	0.000181494		154	0.000741605	154	0.000741605		154.3	0.00262134	154.3	0.00262134
98.87	1.26549e-05	98.87	1.15044e-05		118.8	3.87495e-05	118.8	3.87495e-05		154.3	0.000181539	154.3	0.000181539		154.3	0.00074311	154.3	0.00074311		154.5	0.00262533	154.5	0.00262533
98.98	1.26384e-05	98.98	1.14895e-05		119	3.88061e-05	119	3.88061e-05		154.5	0.000181712	154.5	0.000181712		154.5	0.000744537	154.5	0.000744537		154.8	0.00262928	154.8	0.00262928
99.09	1.25968e-05	99.09	1.14516e-05		119.2	3.87468e-05	119.2	3.87468e-05		154.8	0.000181974	154.8	0.000181974		154.8	0.000745714	154.8	0.000745714		155	0.00263322	155	0.00263322
99.2	1.26353e-05	99.2	1.14866e-05		119.3	3.87862e-05	119.3	3.87862e-05		155	0.00018208	155	0.00018208		155	0.000746813	155	0.000746813		155.3	0.0026372	155.3	0.0026372
99.32	1.25993e-05	99.32	1.14539e-05		119.5	3.86979e-05	119.5	3.86979e-05		155.3	0.000182345	155.3	0.000182345		155.3	0.00074772	155.3	0.00074772		155.6	0.0026412	155.6	0.0026412
99.43	1.2616e-05	99.43	1.14691e-05		119.6	3.8749e-05	119.6	3.8749e-05		155.6	0.000182467	155.6	0.000182467		155.6	0.000748774	155.6	0.000748774		155.8	0.00264536	155.8	0.00264536
99.54	1.26367e-05	99.54	1.14879e-05		119.8	3.86863e-05	119.8	3.86863e-05		155.8	0.000182375	155.8	0.000182375		155.8	0.000749976	155.8	0.000749976		156.1	0.00264954	156.1	0.00264954
99.65	1.26251e-05	99.65	1.14773e-05		120	3.87691e-05	120	3.87691e-05		156.1	0.00018248	156.1	0.00018248		156.1	0.000750809	156.1	0.000750809		156.3	0.00265378	156.3	0.00265378
99.77	1.26023e-05	99.77	1.14566e-05		120.1	3.87105e-05	120.1	3.87105e-05		156.3	0.000182643	156.3	0.000182643		156.3	0.000752305	156.3	0.000752305		156.6	0.00265808	156.6	0.00265808
99.88	1.26645e-05	99.88	1.15132e-05		120.3	3.88218e-05	120.3	3.88218e-05		156.6	0.000183012	156.6	0.000183012		156.6	0.000753754	156.6	0.000753754		156.8	0.00266244	156.8	0.00266244
99.99	1.26216e-05	99.99	1.14742e-05		120.4	3.86884e-05	120.4	3.86884e-05		156.8	0.00018307	156.8	0.00018307		156.8	0.000754605	156.8	0.000754605		157.1	0.00266695	157.1	0.00266695
100.1	1.26016e-05	100.1	1.1456e-05		120.6	3.87348e-05	120.6	3.87348e-05		157.1	0.000183107	157.1	0.000183107		157.1	0.0007556	157.1	0.0007556		157.4	0.00267137	157.4	0.00267137
100.2	1.26146e-05	100.2	1.14678e-05		120.8	3.8674e-05	120.8	3.8674e-05		157.4	0.00018351	157.4	0.00018351		157.4	0.00075678	157.4	0.00075678		157.6	0.00267575	157.6	0.00267575
100.3	1.2609e-05	100.3	1.14627e-05		120.9	3.8774e-05	120.9	3.8774e-05		157.6	0.000183803	157.6	0.000183803		157.6	0.000758293	157.6	0.000758293		157.9	0.00268016	157.9	0.00268016
100.4	1.26027e-05	100.4	1.1457e-05		121.1	3.87493e-05	121.1	3.87493e-05		157.9	0.000183897	157.9	0.000183897		157.9	0.000758958	157.9	0.000758958		158.1	0.00268445	158.1	0.00268445
100.6	1.2623e-05	100.6	1.14755e-05		121.2	3.88465e-05	121.2	3.88465e-05		158.1	0.000184045	158.1	0.000184045		158.1	0.000760314	158.1	0.000760314		158.4	0.00268882	158.4	0.00268882
100.7	1.25845e-05	100.7	1.14405e-05		121.4	3.87886e-05	121.4	3.87886e-05		158.4	0.000184606	158.4	0.000184606		158.4	0.000761556	158.4	0.000761556		158.7	0.00269312	158.7	0.00269312
100.8	1.26434e-05	100.8	1.1494e-05		121.6	3.88448e-05	121.6	3.88448e-05		158.7	0.000184753	158.7	0.000184753		158.7	0.000762755	158.7	0.000762755		158.9	0.00269733	158.9	0.00269733
100.9	1.26419e-05	100.9	1.14926e-05		121.7	3.88107e-05	121.7	3.88107e-05		158.9	0.000185023	158.9	0.000185023		158.9	0.000763806	158.9	0.000763806		159.2	0.00270166	159.2	0.00270166
101	1.26146e-05	101	1.14678e-05		121.9	3.8809e-05	121.9	3.8809e-05		159.2	0.00018552	159.2	0.00018552		159.2	0.000765197	159.2	0.000765197		159.4	0.00270594	159.4	0.00270594
101.1	1.26158e-05	101.1	1.14689e-05		122	3.87848e-05	122	3.87848e-05		159.4	0.000185718	159.4	0.000185718		159.4	0.000766332	159.4	0.000766332		159.7	0.0027101	159.7	0.0027101
101.2	1.26301e-05	101.2	1.14819e-05		122.2	3.88065e-05	122.2	3.88065e-05		159.7	0.000185997	159.7	0.000185997		159.7	0.000767526	159.7	0.000767526		160	0.00271435	160	0.00271435
101.3	1.26255e-05	101.3	1.14778e-05		122.4	3.89072e-05	122.4	3.89072e-05		160	0.000186274	160	0.000186274		160	0.000768087	160	0.000768087		160.2	0.00271859	160.2	0.00271859
101.5	1.26313e-05	101.5	1.1483e-05		122.5	3.88797e-05	122.5	3.88797e-05		160.2	0.000186402	160.2	0.000186402		160.2	0.000769942	160.2	0.000769942		160.5	0.00272274	160.5	0.00272274
101.6	1.26461e-05	101.6	1.14965e-05		122.7	3.90029e-05	122.7	3.90029e-05		160.5	0.000186819	160.5	0.000186819		160.5	0.000770324	160.5	0.000770324		160.7	0.00272692	160.7	0.00272692
101.7	1.26371e-05	101.7	1.14882e-05		122.8	3.89408e-05	122.8	3.89408e-05		160.7	0.000186886	160.7	0.000186886		160.7	0.000771666	160.7	0.000771666		161	0.00273115	161	0.00273115
101.8	1.26303e-05	101.8	1.14821e-05		123	3.90129e-05	123	3.90129e-05		161	0.000187307	161	0.000187307		161	0.000772636	161	0.000772636		161.3	0.0027353	161.3	0.0027353
101.9	1.263e-05	101.9	1.14818e-05		123.2	3.90135e-05	123.2	3.90135e-05		161.3	0.00018737	161.3	0.00018737		161.3	0.000773379	161.3	0.000773379		161.5	0.00273949	161.5	0.00273949
102	1.26179e-05	102	1.14708e-05		123.3	3.90163e-05	123.3	3.90163e-05		161.5	0.000187732	161.5	0.000187732		161.5	0.000774897	161.5	0.000774897		161.8	0.0027436	161.8	0.0027436
102.1	1.26641e-05	102.1	1.15128e-05		123.5	3.90951e-05	123.5	3.90951e-05		161.8	0.000187832	161.8	0.000187832		161.8	0.000775925	161.8	0.000775925		162	0.00274763	162	0.00274763
102.2	1.27114e-05	102.2	1.15558e-05		123.7	3.91079e-05	123.7	3.91079e-05		162	0.000188243	162	0.000188243		162	0.000776719	162	0.000776719		162.3	0.00275171	162.3	0.00275171
102.4	1.26684e-05	102.4	1.15167e-05		123.8	3.9212e-05	123.8	3.9212e-05		162.3	0.000188373	162.3	0.000188373		162.3	0.000778482	162.3	0.000778482		162.6	0.00275574	162.6	0.00275574
102.5	1.26936e-05	102.5	1.15396e-05		124	3.92564e-05	124	3.92564e-05		162.6	0.000188743	162.6	0.000188743		162.6	0.000778892	162.6	0.000778892		162.8	0.00275988	162.8	0.00275988
102.6	1.26876e-05	102.6	1.15342e-05		124.1	3.93238e-05	124.1	3.93238e-05		162.8	0.000188921	162.8	0.000188921		162.8	0.000780675	162.8	0.000780675		163.1	0.00276391	163.1	0.00276391
102.7	1.26919e-05	102.7	1.15381e-05		124.3	3.94318e-05	124.3	3.94318e-05		163.1	0.000188907	163.1	0.000188907		163.1	0.000781678	163.1	0.000781678		163.4	0.00276808	163.4	0.00276808
102.8	1.27037e-05	102.8	1.15488e-05		124.5	3.93881e-05	124.5	3.93881e-05		163.4	0.000189138	163.4	0.000189138		163.4	0.000782305	163.4	0.000782305		163.6	0.00277221	163.6	0.00277221
102.9	1.2724e-05	102.9	1.15673e-05		124.6	3.95117e-05	124.6	3.95117e-05		163.6	0.000189057	163.6	0.000189057		163.6	0.000784026	163.6	0.000784026		163.9	0.00277628	163.9	0.00277628
103	1.27236e-05	103	1.15669e-05		124.8	3.95228e-05	124.8	3.95228e-05		163.9	0.000188915	163.9	0.000188915		163.9	0.00078422	163.9	0.00078422		164.2	0.0027804	164.2	0.0027804
103.1	1.27203e-05	103.1	1.15639e-05		125	3.95129e-05	125	3.95129e-05		164.2	0.000189073	164.2	0.000189073		164.2	0.000785579	164.2	0.000785579		164.4	0.00278446	164.4	0.00278446
103.3	1.2761e-05	103.3	1.16009e-05		125.1	3.96613e-05	125.1	3.96613e-05		164.4	0.000189047	164.4	0.000189047		164.4	0.000786797	164.4	0.000786797		164.7	0.00278845	164.7	0.00278845
103.4	1.27124e-05	103.4	1.15567e-05		125.3	3.96496e-05	125.3	3.96496e-05		164.7	0.00018887	164.7	0.00018887		164.7	0.000787958	164.7	0.000787958		165	0.0027924	165	0.0027924
103.5	1.27277e-05	103.5	1.15706e-05		125.4	3.9716e-05	125.4	3.9716e-05		165	0.0001893	165	0.0001893		165	0.000788726	165	0.000788726		165.2	0.00279647	165.2	0.00279647
103.6	1.27758e-05	103.6	1.16144e-05		125.6	3.98539e-05	125.6	3.98539e-05		165.2	0.000189487	165.2	0.000189487		165.2	0.000790446	165.2	0.000790446		165.5	0.0028005	165.5	0.0028005
103.7	1.27471e-05	103.7	1.15882e-05		125.8	3.98651e-05	125.8	3.98651e-05		165.5	0.000189597	165.5	0.000189597		165.5	0.00079162	165.5	0.00079162		165.8	0.00280468	165.8	0.00280468
103.8	1.27438e-05	103.8	1.15853e-05		125.9	3.99522e-05	125.9	3.99522e-05		165.8	0.000189793	165.8	0.000189793		165.8	0.000792625	165.8	0.000792625		166	0.0028088	166	0.0028088
103.9	1.28005e-05	103.9	1.16368e-05		126.1	4.00247e-05	126.1	4.00247e-05		166	0.000190327	166	0.000190327		166	0.000793517	166	0.000793517		166.3	0.00281303	166.3	0.00281303
104.1	1.27897e-05	104.1	1.1627e-05		126.3	4.00191e-05	126.3	4.00191e-05		166.3	0.000190728	166.3	0.000190728		166.3	0.000794365	166.3	0.000794365		166.6	0.00281723	166.6	0.00281723
104.2	1.27461e-05	104.2	1.15874e-05		126.4	4.00931e-05	126.4	4.00931e-05		166.6	0.000191014	166.6	0.000191014		166.6	0.000795857	166.6	0.000795857		166.8	0.00282158	166.8	0.00282158
104.3	1.27827e-05	104.3	1.16206e-05		126.6	4.02794e-05	126.6	4.02794e-05		166.8	0.000191062	166.8	0.000191062		166.8	0.000796903	166.8	0.000796903		167.1	0.00282594	167.1	0.00282594
104.4	1.27816e-05	104.4	1.16197e-05		126.8	4.02334e-05	126.8	4.02334e-05		167.1	0.000191307	167.1	0.000191307		167.1	0.000798079	167.1	0.000798079		167.4	0.00283042	167.4	0.00283042
104.5	1.2794e-05	104.5	1.16309e-05		126.9	4.03085e-05	126.9	4.03085e-05		167.4	0.00019172	167.4	0.00019172		167.4	0.000799076	167.4	0.000799076		167.6	0.00283469	167.6	0.00283469
104.6	1.28715e-05	104.6	1.17014e-05		127.1	4.04712e-05	127.1	4.04712e-05		167.6	0.000192014	167.6	0.000192014		167.6	0.000800358	167.6	0.000800358		167.9	0.00283909	167.9	0.00283909
104.7	1.28591e-05	104.7	1.169e-05		127.2	4.04367e-05	127.2	4.04367e-05		167.9	0.000192295	167.9	0.000192295		167.9	0.000801686	167.9	0.000801686		168.2	0.00284353	168.2	0.00284353
104.8	1.28376e-05	104.8	1.16706e-05		127.4	4.04475e-05	127.4	4.04475e-05		168.2	0.000192431	168.2	0.000192431		168.2	0.000802598	168.2	0.000802598		168.4	0.00284806	168.4	0.00284806
105	1.28368e-05	105	1.16698e-05		127.6	4.05225e-05	127.6	4.05225e-05		168.4	0.00019268	168.4	0.00019268		168.4	0.000803894	168.4	0.000803894		168.7	0.00285257	168.7	0.00285257
105.1	1.29196e-05	105.1	1.17451e-05		127.7	4.05335e-05	127.7	4.05335e-05		168.7	0.000192849	168.7	0.000192849		168.7	0.000804607	168.7	0.000804607		169	0.00285712	169	0.00285712
105.2	1.29178e-05	105.2	1.17435e-05		127.9	4.0521e-05	127.9	4.0521e-05		169	0.000193232	169	0.000193232		169	0.000806145	169	0.000806145		169.2	0.00286171	169.2	0.00286171
105.3	1.2919e-05	105.3	1.17445e-05		128.1	4.05756e-05	128.1	4.05756e-05		169.2	0.000193526	169.2	0.000193526		169.2	0.000806835	169.2	0.000806835		169.5	0.00286616	169.5	0.00286616
105.4	1.29764e-05	105.4	1.17967e-05		128.2	4.06241e-05	128.2	4.06241e-05		169.5	0.000193718	169.5	0.000193718		169.5	0.000808348	169.5	0.000808348		169.8	0.00287062	169.8	0.00287062
105.5	1.29903e-05	105.5	1.18094e-05		128.4	4.06486e-05	128.4	4.06486e-05		169.8	0.000194065	169.8	0.000194065		169.8	0.000809273	169.8	0.000809273		170	0.00287493	170	0.00287493
105.6	1.29853e-05	105.6	1.18048e-05		128.6	4.06269e-05	128.6	4.06269e-05		170	0.000194231	170	0.000194231		170	0.000810319	170	0.000810319		170.3	0.00287929	170.3	0.00287929
105.8	1.29954e-05	105.8	1.1814e-05		128.7	4.06771e-05	128.7	4.06771e-05		170.3	0.000194526	170.3	0.000194526		170.3	0.000811659	170.3	0.000811659		170.6	0.00288362	170.6	0.00288362
105.9	1.30286e-05	105.9	1.18442e-05		128.9	4.06979e-05	128.9	4.06979e-05		170.6	0.00019472	170.6	0.00019472		170.6	0.000812142	170.6	0.000812142		170.9	0.00288776	170.9	0.00288776
106	1.31072e-05	106	1.19157e-05		129.1	4.06823e-05	129.1	4.06823e-05		170.9	0.000195064	170.9	0.000195064		170.9	0.000813452	170.9	0.000813452		171.1	0.00289198	171.1	0.00289198
106.1	1.31525e-05	106.1	1.19569e-05		129.2	4.06598e-05	129.2	4.06598e-05		171.1	0.000195092	171.1	0.000195092		171.1	0.000814183	171.1	0.000814183		171.4	0.00289619	171.4	0.00289619
106.2	1.31846e-05	106.2	1.1986e-05		129.4	4.06619e-05	129.4	4.06619e-05		171.4	0.000195208	171.4	0.000195208		171.4	0.000815178	171.4	0.000815178		171.7	0.00290051	171.7	0.00290051
106.3	1.3187e-05	106.3	1.19882e-05		129.5	4.07227e-05	129.5	4.07227e-05		171.7	0.000195464	171.7	0.000195464		171.7	0.000816403	171.7	0.000816403		172	0.00290481	172	0.00290481
106.4	1.32276e-05	106.4	1.20251e-05		129.7	4.06831e-05	129.7	4.06831e-05		172	0.000195522	172	0.000195522		172	0.000817447	172	0.000817447		172.2	0.00290891	172.2	0.00290891
106.5	1.3292e-05	106.5	1.20836e-05		129.9	4.06083e-05	129.9	4.06083e-05		172.2	0.000195804	172.2	0.000195804		172.2	0.000818503	172.2	0.000818503		172.5	0.00291306	172.5	0.00291306
106.7	1.33153e-05	106.7	1.21048e-05		130	4.06179e-05	130	4.06179e-05		172.5	0.000196135	172.5	0.000196135		172.5	0.000819501	172.5	0.000819501		172.8	0.00291707	172.8	0.00291707
106.8	1.33392e-05	106.8	1.21265e-05		130.2	4.06793e-05	130.2	4.06793e-05		172.8	0.000196295	172.8	0.000196295		172.8	0.000820031	172.8	0.000820031		173	0.00292098	173	0.00292098
106.9	1.33755e-05	106.9	1.21595e-05		130.4	4.06969e-05	130.4	4.06969e-05		173	0.000196685	173	0.000196685		173	0.00082138	173	0.00082138		173.3	0.00292501	173.3	0.00292501
107	1.33708e-05	107	1.21553e-05		130.5	4.07172e-05	130.5	4.07172e-05		173.3	0.000196984	173.3	0.000196984		173.3	0.000822739	173.3	0.000822739		173.6	0.00292912	173.6	0.00292912
107.1	1.33489e-05	107.1	1.21353e-05		130.7	4.06236e-05	130.7	4.06236e-05		173.6	0.000197187	173.6	0.000197187		173.6	0.000823712	173.6	0.000823712		173.9	0.00293325	173.9	0.00293325
107.2	1.33395e-05	107.2	1.21268e-05		130.9	4.06502e-05	130.9	4.06502e-05		173.9	0.000197668	173.9	0.000197668		173.9	0.00082515	173.9	0.00082515		174.1	0.00293752	174.1	0.00293752
107.3	1.33585e-05	107.3	1.2144e-05		131	4.07078e-05	131	4.07078e-05		174.1	0.000197869	174.1	0.000197869		174.1	0.000826293	174.1	0.000826293		174.4	0.00294176	174.4	0.00294176
107.5	1.3356e-05	107.5	1.21418e-05		131.2	4.07596e-05	131.2	4.07596e-05		174.4	0.000197944	174.4	0.000197944		174.4	0.000827412	174.4	0.000827412		174.7	0.00294592	174.7	0.00294592
107.6	1.33644e-05	107.6	1.21495e-05		131.4	4.07486e-05	131.4	4.07486e-05		174.7	0.000198484	174.7	0.000198484		174.7	0.00082857	174.7	0.00082857		175	0.00295021	175	0.00295021
107.7	1.33932e-05	107.7	1.21756e-05		131.5	4.07402e-05	131.5	4.07402e-05		175	0.000198864	175	0.000198864		175	0.000829654	175	0.000829654		175.2	0.00295459	175.2	0.00295459
107.8	1.33634e-05	107.8	1.21485e-05		131.7	4.07301e-05	131.7	4.07301e-05		175.2	0.00019878	175.2	0.00019878		175.2	0.000830833	175.2	0.000830833		175.5	0.00295897	175.5	0.00295897
107.9	1.33282e-05	107.9	1.21166e-05		131.9	4.07645e-05	131.9	4.07645e-05		175.5	0.000199044	175.5	0.000199044		175.5	0.000831659	175.5	0.000831659		175.8	0.00296332	175.8	0.00296332
108	1.33558e-05	108	1.21416e-05		132	4.08057e-05	132	4.08057e-05		175.8	0.000199209	175.8	0.000199209		175.8	0.000832803	175.8	0.000832803		176.1	0.00296777	176.1	0.00296777
108.1	1.33508e-05	108.1	1.21371e-05		132.2	4.08553e-05	132.2	4.08553e-05		176.1	0.000199183	176.1	0.000199183		176.1	0.000833993	176.1	0.000833993		176.3	0.00297229	176.3	0.00297229
108.2	1.33164e-05	108.2	1.21058e-05		132.4	4.08801e-05	132.4	4.08801e-05		176.4	0.000199684	176.4	0.000199684		176.4	0.000834644	176.4	0.000834644		176.6	0.00297672	176.6	0.00297672
108.4	1.32911e-05	108.4	1.20828e-05		132.5	4.08087e-05	132.5	4.08087e-05		176.6	0.000199918	176.6	0.000199918		176.6	0.000836057	176.6	0.000836057		176.9	0.00298106	176.9	0.00298106
108.5	1.33143e-05	108.5	1.21039e-05		132.7	4.08102e-05	132.7	4.08102e-05		176.9	0.000200404	176.9	0.000200404		176.9	0.00083772	176.9	0.00083772		177.2	0.00298544	177.2	0.00298544
108.6	1.3321e-05	108.6	1.211e-05		132.9	4.0849e-05	132.9	4.0849e-05		177.2	0.00020063	177.2	0.00020063		177.2	0.000838503	177.2	0.000838503		177.5	0.00298981	177.5	0.00298981
108.7	1.32822e-05	108.7	1.20747e-05		133	4.0887e-05	133	4.0887e-05		177.5	0.000200714	177.5	0.000200714		177.5	0.000839393	177.5	0.000839393		177.7	0.00299418	177.7	0.00299418
108.8	1.32877e-05	108.8	1.20797e-05		133.2	4.09679e-05	133.2	4.09679e-05		177.7	0.000201183	177.7	0.000201183		177.7	0.000840157	177.7	0.000840157		178	0.00299843	178	0.00299843
108.9	1.33047e-05	108.9	1.20951e-05		133.4	4.10144e-05	133.4	4.10144e-05		178	0.000201486	178	0.000201486		178	0.00084168	178	0.00084168		178.3	0.00300268	178.3	0.00300268
109	1.32888e-05	109	1.20808e-05		133.5	4.10127e-05	133.5	4.10127e-05		178.3	0.000201916	178.3	0.000201916		178.3	0.000842829	178.3	0.000842829		178.6	0.00300699	178.6	0.00300699
109.2	1.32674e-05	109.2	1.20612e-05		133.7	4.09879e-05	133.7	4.09879e-05		178.6	0.0002022	178.6	0.0002022		178.6	0.000844151	178.6	0.000844151		178.9	0.0030113	178.9	0.0030113
109.3	1.3279e-05	109.3	1.20718e-05		133.9	4.09729e-05	133.9	4.09729e-05		178.9	0.000202426	178.9	0.000202426		178.9	0.000844871	178.9	0.000844871		179.1	0.00301565	179.1	0.00301565
109.4	1.32702e-05	109.4	1.20639e-05		134	4.09955e-05	134	4.09955e-05		179.1	0.000202652	179.1	0.000202652		179.1	0.0008462	179.1	0.0008462		179.4	0.00301997	179.4	0.00301997
109.5	1.32705e-05	109.5	1.20641e-05		134.2	4.09769e-05	134.2	4.09769e-05		179.4	0.000202754	179.4	0.000202754		179.4	0.000847812	179.4	0.000847812		179.7	0.00302421	179.7	0.00302421
109.6	1.32555e-05	109.6	1.20505e-05		134.4	4.09811e-05	134.4	4.09811e-05		179.7	0.000203204	179.7	0.000203204		179.7	0.000849079	179.7	0.000849079		180	0.0030285	180	0.0030285
109.7	1.32729e-05	109.7	1.20663e-05		134.5	4.10196e-05	134.5	4.10196e-05		180	0.000203206	180	0.000203206		180	0.000850376	180	0.000850376		180.3	0.00303278	180.3	0.00303278
109.8	1.32411e-05	109.8	1.20373e-05		134.7	4.10589e-05	134.7	4.10589e-05		180.3	0.000203564	180.3	0.000203564		180.3	0.000851533	180.3	0.000851533		180.5	0.00303708	180.5	0.00303708
110	1.3233e-05	110	1.203e-05		134.9	4.10739e-05	134.9	4.10739e-05		180.5	0.000203785	180.5	0.000203785		180.5	0.000852815	180.5	0.000852815		180.8	0.00304133	180.8	0.00304133
110.1	1.32603e-05	110.1	1.20548e-05		135	4.11199e-05	135	4.11199e-05		180.8	0.000203796	180.8	0.000203796		180.8	0.000854252	180.8	0.000854252		181.1	0.00304564	181.1	0.00304564
110.2	1.32772e-05	110.2	1.20702e-05		135.2	4.11312e-05	135.2	4.11312e-05		181.1	0.000203942	181.1	0.000203942		181.1	0.000855203	181.1	0.000855203		181.4	0.00305006	181.4	0.00305006
110.3	1.32674e-05	110.3	1.20613e-05		135.4	4.11559e-05	135.4	4.11559e-05		181.4	0.000204193	181.4	0.000204193		181.4	0.000857001	181.4	0.000857001		181.7	0.00305444	181.7	0.00305444
110.4	1.32331e-05	110.4	1.20301e-05		135.5	4.1215e-05	135.5	4.1215e-05		181.7	0.000204049	181.7	0.000204049		181.7	0.000858548	181.7	0.000858548		181.9	0.00305887	181.9	0.00305887
110.5	1.32526e-05	110.5	1.20478e-05		135.7	4.12218e-05	135.7	4.12218e-05		181.9	0.000204232	181.9	0.000204232		181.9	0.000859414	181.9	0.000859414		182.2	0.0030633	182.2	0.0030633
110.6	1.3247e-05	110.6	1.20427e-05		135.9	4.12909e-05	135.9	4.12909e-05		182.2	0.000204515	182.2	0.000204515		182.2	0.000860357	182.2	0.000860357		182.5	0.0030678	182.5	0.0030678
110.7	1.32225e-05	110.7	1.20204e-05		136	4.13442e-05	136	4.13442e-05		182.5	0.000204447	182.5	0.000204447		182.5	0.00086137	182.5	0.00086137		182.8	0.00307216	182.8	0.00307216
110.9	1.31828e-05	110.9	1.19844e-05		136.2	4.13462e-05	136.2	4.13462e-05		182.8	0.000204347	182.8	0.000204347		182.8	0.000862563	182.8	0.000862563		183.1	0.00307656	183.1	0.00307656
111	1.31831e-05	111	1.19847e-05		136.4	4.13375e-05	136.4	4.13375e-05		183.1	0.000204604	183.1	0.000204604		183.1	0.000863632	183.1	0.000863632		183.4	0.00308104	183.4	0.00308104
111.1	1.31646e-05	111.1	1.19678e-05		136.6	4.13183e-05	136.6	4.13183e-05		183.4	0.000204799	183.4	0.000204799		183.4	0.000864073	183.4	0.000864073		183.7	0.00308556	183.7	0.00308556
111.2	1.32026e-05	111.2	1.20024e-05		136.7	4.12656e-05	136.7	4.12656e-05		183.7	0.000205238	183.7	0.000205238		183.7	0.000864899	183.7	0.000864899		183.9	0.00309003	183.9	0.00309003
111.3	1.32116e-05	111.3	1.20105e-05		136.9	4.12318e-05	136.9	4.12318e-05		183.9	0.000205442	183.9	0.000205442		183.9	0.000865491	183.9	0.000865491		184.2	0.00309439	184.2	0.00309439
111.4	1.32053e-05	111.4	1.20048e-05		137.1	4.12144e-05	137.1	4.12144e-05		184.2	0.000205625	184.2	0.000205625		184.2	0.000866631	184.2	0.000866631		184.5	0.00309862	184.5	0.00309862
111.5	1.31863e-05	111.5	1.19875e-05		137.2	4.1117e-05	137.2	4.1117e-05		184.5	0.000206053	184.5	0.000206053		184.5	0.000867696	184.5	0.000867696		184.8	0.00310277	184.8	0.00310277
111.7	1.31982e-05	111.7	1.19984e-05		137.4	4.11444e-05	137.4	4.11444e-05		184.8	0.000206173	184.8	0.000206173		184.8	0.000868576	184.8	0.000868576		185.1	0.00310698	185.1	0.00310698
111.8	1.31947e-05	111.8	1.19951e-05		137.6	4.11559e-05	137.6	4.11559e-05		185.1	0.000206308	185.1	0.000206308		185.1	0.000869596	185.1	0.000869596		185.4	0.00311131	185.4	0.00311131
111.9	1.32293e-05	111.9	1.20266e-05		137.7	4.11619e-05	137.7	4.11619e-05		185.4	0.000206406	185.4	0.000206406		185.4	0.000870642	185.4	0.000870642		185.6	0.00311588	185.6	0.00311588
112	1.31995e-05	112	1.19996e-05		137.9	4.11026e-05	137.9	4.11026e-05		185.6	0.000206588	185.6	0.000206588		185.6	0.000871446	185.6	0.000871446		185.9	0.00312068	185.9	0.00312068
112.1	1.3186e-05	112.1	1.19873e-05		138.1	4.11215e-05	138.1	4.11215e-05		185.9	0.000206718	185.9	0.000206718		185.9	0.000872444	185.9	0.000872444		186.2	0.00312553	186.2	0.00312553
112.2	1.32183e-05	112.2	1.20166e-05		138.2	4.11233e-05	138.2	4.11233e-05		186.2	0.000206999	186.2	0.000206999		186.2	0.000873827	186.2	0.000873827		186.5	0.00313048	186.5	0.00313048
112.3	1.32263e-05	112.3	1.20239e-05		138.4	4.11618e-05	138.4	4.11618e-05		186.5	0.000207164	186.5	0.000207164		186.5	0.000874819	186.5	0.000874819		186.8	0.00313541	186.8	0.00313541
112.5	1.31922e-05	112.5	1.19929e-05		138.6	4.11703e-05	138.6	4.11703e-05		186.8	0.000207504	186.8	0.000207504		186.8	0.000876149	186.8	0.000876149		187.1	0.00314036	187.1	0.00314036
112.6	1.31856e-05	112.6	1.19869e-05		138.8	4.12301e-05	138.8	4.12301e-05		187.1	0.000207837	187.1	0.000207837		187.1	0.000877406	187.1	0.000877406		187.4	0.00314519	187.4	0.00314519
112.7	1.31801e-05	112.7	1.19819e-05		138.9	4.12136e-05	138.9	4.12136e-05		187.4	0.000208255	187.4	0.000208255		187.4	0.000878808	187.4	0.000878808		187.7	0.00315012	187.7	0.00315012
112.8	1.32101e-05	112.8	1.20092e-05		139.1	4.12439e-05	139.1	4.12439e-05		187.7	0.000208592	187.7	0.000208592		187.7	0.000880545	187.7	0.000880545		187.9	0.00315501	187.9	0.00315501
112.9	1.31724e-05	112.9	1.19749e-05		139.3	4.12157e-05	139.3	4.12157e-05		188	0.000208746	188	0.000208746		188	0.000881708	188	0.000881708		188.2	0.00315971	188.2	0.00315971
113	1.31447e-05	113	1.19497e-05		139.4	4.13024e-05	139.4	4.13024e-05		188.2	0.000209062	188.2	0.000209062		188.2	0.000883161	188.2	0.000883161		188.5	0.00316431	188.5	0.00316431
113.1	1.3191e-05	113.1	1.19918e-05		139.6	4.12962e-05	139.6	4.12962e-05		188.5	0.000209384	188.5	0.000209384		188.5	0.000884318	188.5	0.000884318		188.8	0.0031689	188.8	0.0031689
113.3	1.31815e-05	113.3	1.19831e-05		139.8	4.13107e-05	139.8	4.13107e-05		188.8	0.00020995	188.8	0.00020995		188.8	0.000885686	188.8	0.000885686		189.1	0.0031735	189.1	0.0031735
113.4	1.32228e-05	113.4	1.20208e-05		139.9	4.12842e-05	139.9	4.12842e-05		189.1	0.000210182	189.1	0.000210182		189.1	0.00088697	189.1	0.00088697		189.4	0.00317794	189.4	0.00317794
113.5	1.32037e-05	113.5	1.20034e-05		140.1	4.13319e-05	140.1	4.13319e-05		189.4	0.000210331	189.4	0.000210331		189.4	0.00088826	189.4	0.00088826		189.7	0.00318244	189.7	0.00318244
113.6	1.31849e-05	113.6	1.19863e-05		140.3	4.13915e-05	140.3	4.13915e-05		189.7	0.000210583	189.7	0.000210583		189.7	0.00088991	189.7	0.00088991		190	0.00318685	190	0.00318685
113.7	1.32229e-05	113.7	1.20208e-05		140.5	4.1415e-05	140.5	4.1415e-05		190	0.000210894	190	0.000210894		190	0.000890875	190	0.000890875		190.3	0.00319117	190.3	0.00319117
113.8	1.32026e-05	113.8	1.20024e-05		140.6	4.14014e-05	140.6	4.14014e-05		190.3	0.000211119	190.3	0.000211119		190.3	0.000891894	190.3	0.000891894		190.6	0.0031954	190.6	0.0031954
113.9	1.31774e-05	113.9	1.19795e-05		140.8	4.13991e-05	140.8	4.13991e-05		190.6	0.000211477	190.6	0.000211477		190.6	0.000893086	190.6	0.000893086		190.9	0.00319965	190.9	0.00319965
114.1	1.31844e-05	114.1	1.19858e-05		141	4.14458e-05	141	4.14458e-05		190.9	0.000211408	190.9	0.000211408		190.9	0.000894368	190.9	0.000894368		191.1	0.00320401	191.1	0.00320401
114.2	1.31994e-05	114.2	1.19995e-05		141.1	4.14162e-05	141.1	4.14162e-05		191.1	0.000211617	191.1	0.000211617		191.1	0.000895724	191.1	0.000895724		191.4	0.00320849	191.4	0.00320849
114.3	1.32241e-05	114.3	1.20219e-05		141.3	4.13971e-05	141.3	4.13971e-05		191.4	0.000211888	191.4	0.000211888		191.4	0.000896931	191.4	0.000896931		191.7	0.00321291	191.7	0.00321291
114.4	1.31941e-05	114.4	1.19946e-05		141.5	4.14279e-05	141.5	4.14279e-05		191.7	0.000212016	191.7	0.000212016		191.7	0.000898552	191.7	0.000898552		192	0.00321739	192	0.00321739
114.5	1.31859e-05	114.5	1.19872e-05		141.6	4.14411e-05	141.6	4.14411e-05		192	0.000212525	192	0.000212525		192	0.000900438	192	0.000900438		192.3	0.00322181	192.3	0.00322181
114.6	1.32341e-05	114.6	1.2031e-05		141.8	4.14196e-05	141.8	4.14196e-05		192.3	0.000213209	192.3	0.000213209		192.3	0.000901823	192.3	0.000901823		192.6	0.00322623	192.6	0.00322623
114.7	1.32392e-05	114.7	1.20356e-05		142	4.147e-05	142	4.147e-05		192.6	0.000213537	192.6	0.000213537		192.6	0.000903482	192.6	0.000903482		192.9	0.00323072	192.9	0.00323072
114.9	1.32419e-05	114.9	1.20381e-05		142.2	4.15356e-05	142.2	4.15356e-05		192.9	0.0002138	192.9	0.0002138		192.9	0.000904556	192.9	0.000904556		193.2	0.00323533	193.2	0.00323533
115	1.32444e-05	115	1.20403e-05		142.3	4.15991e-05	142.3	4.15991e-05		193.2	0.000214016	193.2	0.000214016		193.2	0.000905302	193.2	0.000905302		193.5	0.00323987	193.5	0.00323987
115.1	1.32694e-05	115.1	1.20631e-05		142.5	4.15873e-05	142.5	4.15873e-05		193.5	0.00021398	193.5	0.00021398		193.5	0.000906947	193.5	0.000906947		193.8	0.00324442	193.8	0.00324442
115.2	1.32853e-05	115.2	1.20776e-05		142.7	4.15688e-05	142.7	4.15688e-05		193.8	0.000214543	193.8	0.000214543		193.8	0.000908188	193.8	0.000908188		194.1	0.00324909	194.1	0.00324909
115.3	1.32844e-05	115.3	1.20767e-05		142.8	4.16247e-05	142.8	4.16247e-05		194.1	0.000214588	194.1	0.000214588		194.1	0.000909714	194.1	0.000909714		194.4	0.0032539	194.4	0.0032539
115.4	1.32813e-05	115.4	1.20739e-05		143	4.16896e-05	143	4.16896e-05		194.4	0.000214957	194.4	0.000214957		194.4	0.000910339	194.4	0.000910339		194.7	0.00325872	194.7	0.00325872
115.5	1.32649e-05	115.5	1.2059e-05		143.2	4.1752e-05	143.2	4.1752e-05		194.7	0.000215063	194.7	0.000215063		194.7	0.000911508	194.7	0.000911508		195	0.00326357	195	0.00326357
115.7	1.32841e-05	115.7	1.20764e-05		143.4	4.17976e-05	143.4	4.17976e-05		195	0.000215672	195	0.000215672		195	0.000912797	195	0.000912797		195.3	0.00326827	195.3	0.00326827
115.8	1.32623e-05	115.8	1.20566e-05		143.5	4.18045e-05	143.5	4.18045e-05		195.3	0.000215846	195.3	0.000215846		195.3	0.000914277	195.3	0.000914277		195.6	0.0032729	195.6	0.0032729
115.9	1.32419e-05	115.9	1.20381e-05		143.7	4.18281e-05	143.7	4.18281e-05		195.6	0.000216365	195.6	0.000216365		195.6	0.000915375	195.6	0.000915375		195.9	0.00327755	195.9	0.00327755
116	1.3279e-05	116	1.20718e-05		143.9	4.18757e-05	143.9	4.18757e-05		195.9	0.00021639	195.9	0.00021639		195.9	0.00091666	195.9	0.00091666		196.2	0.00328228	196.2	0.00328228
116.1	1.3323e-05	116.1	1.21118e-05		144.1	4.18883e-05	144.1	4.18883e-05		196.2	0.000216869	196.2	0.000216869		196.2	0.000916879	196.2	0.000916879		196.4	0.00328693	196.4	0.00328693
116.2	1.33047e-05	116.2	1.20952e-05		144.2	4.19786e-05	144.2	4.19786e-05		196.4	0.000217124	196.4	0.000217124		196.4	0.000918006	196.4	0.000918006		196.7	0.00329153	196.7	0.00329153
116.3	1.3329e-05	116.3	1.21172e-05		144.4	4.19977e-05	144.4	4.19977e-05		196.7	0.000217408	196.7	0.000217408		196.7	0.000919366	196.7	0.000919366		197	0.00329626	197	0.00329626
116.5	1.33106e-05	116.5	1.21005e-05		144.6	4.19953e-05	144.6	4.19953e-05		197	0.000217623	197	0.000217623		197	0.000920689	197	0.000920689		197.3	0.00330093	197.3	0.00330093
116.6	1.3342e-05	116.6	1.21291e-05		144.7	4.20375e-05	144.7	4.20375e-05		197.3	0.000217621	197.3	0.000217621		197.3	0.00092189	197.3	0.00092189		197.6	0.00330558	197.6	0.00330558
116.7	1.33408e-05	116.7	1.2128e-05		144.9	4.21363e-05	144.9	4.21363e-05		197.6	0.000217859	197.6	0.000217859		197.6	0.000922946	197.6	0.000922946		197.9	0.00331021	197.9	0.00331021
116.8	1.33445e-05	116.8	1.21314e-05		145.1	4.215e-05	145.1	4.215e-05		197.9	0.000218052	197.9	0.000218052		197.9	0.00092437	197.9	0.00092437		198.2	0.00331477	198.2	0.00331477
116.9	1.33059e-05	116.9	1.20963e-05		145.3	4.20835e-05	145.3	4.20835e-05		198.2	0.000217944	198.2	0.000217944		198.2	0.000925967	198.2	0.000925967		198.5	0.00331942	198.5	0.00331942
117	1.33179e-05	117	1.21072e-05		145.4	4.2127e-05	145.4	4.2127e-05		198.5	0.00021793	198.5	0.00021793		198.5	0.000926738	198.5	0.000926738		198.8	0.00332398	198.8	0.00332398
117.1	1.33242e-05	117.1	1.21129e-05		145.6	4.22697e-05	145.6	4.22697e-05		198.8	0.000218278	198.8	0.000218278		198.8	0.000927727	198.8	0.000927727		199.1	0.00332861	199.1	0.00332861
117.3	1.33094e-05	117.3	1.20994e-05		145.8	4.22313e-05	145.8	4.22313e-05		199.1	0.000218496	199.1	0.000218496		199.1	0.000929496	199.1	0.000929496		199.4	0.00333318	199.4	0.00333318
117.4	1.33044e-05	117.4	1.20949e-05		146	4.21319e-05	146	4.21319e-05		199.4	0.000218599	199.4	0.000218599		199.4	0.000930628	199.4	0.000930628		199.7	0.00333768	199.7	0.00333768
117.5	1.32956e-05	117.5	1.20869e-05		146.1	4.21445e-05	146.1	4.21445e-05		199.7	0.000218791	199.7	0.000218791		199.7	0.000931462	199.7	0.000931462		200	0.00334216	200	0.00334216
117.6	1.32938e-05	117.6	1.20853e-05		146.3	4.21764e-05	146.3	4.21764e-05		200	0.000219313	200	0.000219313		200	0.000932647	200	0.000932647		200.3	0.00334678	200.3	0.00334678
117.7	1.3339e-05	117.7	1.21264e-05		146.5	4.21685e-05	146.5	4.21685e-05		200.3	0.000219631	200.3	0.000219631		200.3	0.000933719	200.3	0.000933719		200.6	0.00335156	200.6	0.00335156
117.8	1.33191e-05	117.8	1.21083e-05		146.6	4.21616e-05	146.6	4.21616e-05		200.6	0.000219719	200.6	0.000219719		200.6	0.000934488	200.6	0.000934488		200.9	0.0033566	200.9	0.0033566
118	1.33162e-05	118	1.21056e-05		146.8	4.2235e-05	146.8	4.2235e-05		200.9	0.000219933	200.9	0.000219933		200.9	0.000935913	200.9	0.000935913		201.2	0.00336151	201.2	0.00336151
118.1	1.33174e-05	118.1	1.21067e-05		147	4.23034e-05	147	4.23034e-05		201.2	0.000219926	201.2	0.000219926		201.2	0.000936931	201.2	0.000936931		201.5	0.00336642	201.5	0.00336642
118.2	1.3353e-05	118.2	1.21391e-05		147.2	4.23148e-05	147.2	4.23148e-05		201.5	0.000219889	201.5	0.000219889		201.5	0.000937392	201.5	0.000937392		201.8	0.00337141	201.8	0.00337141
118.3	1.3389e-05	118.3	1.21718e-05		147.3	4.23809e-05	147.3	4.23809e-05		201.9	0.000220011	201.9	0.000220011		201.9	0.000938652	201.9	0.000938652		202.2	0.00337624	202.2	0.00337624
118.4	1.33518e-05	118.4	1.2138e-05		147.5	4.25599e-05	147.5	4.25599e-05		202.2	0.000220277	202.2	0.000220277		202.2	0.000939727	202.2	0.000939727		202.5	0.00338096	202.5	0.00338096
118.5	1.33592e-05	118.5	1.21447e-05		147.7	4.26214e-05	147.7	4.26214e-05		202.5	0.000220445	202.5	0.000220445		202.5	0.000940659	202.5	0.000940659		202.8	0.00338573	202.8	0.00338573
118.6	1.33415e-05	118.6	1.21286e-05		147.9	4.26647e-05	147.9	4.26647e-05		202.8	0.00022074	202.8	0.00022074		202.8	0.000942067	202.8	0.000942067		203.1	0.00339037	203.1	0.00339037
118.8	1.33641e-05	118.8	1.21491e-05		148	4.28317e-05	148	4.28317e-05		203.1	0.000220993	203.1	0.000220993		203.1	0.000943387	203.1	0.000943387		203.4	0.00339507	203.4	0.00339507
118.9	1.33468e-05	118.9	1.21335e-05		148.2	4.2868e-05	148.2	4.2868e-05		203.4	0.000221179	203.4	0.000221179		203.4	0.000944928	203.4	0.000944928		203.7	0.00339974	203.7	0.00339974
119	1.33189e-05	119	1.21081e-05		148.4	4.28779e-05	148.4	4.28779e-05		203.7	0.000221482	203.7	0.000221482		203.7	0.000946225	203.7	0.000946225		204	0.00340458	204	0.00340458
119.1	1.33357e-05	119.1	1.21233e-05		148.6	4.30669e-05	148.6	4.30669e-05		204	0.000221685	204	0.000221685		204	0.00094717	204	0.00094717		204.3	0.00340931	204.3	0.00340931
119.2	1.3352e-05	119.2	1.21381e-05		148.7	4.30609e-05	148.7	4.30609e-05		204.3	0.000221987	204.3	0.000221987		204.3	0.00094891	204.3	0.00094891		204.6	0.00341407	204.6	0.00341407
119.3	1.33546e-05	119.3	1.21406e-05		148.9	4.30867e-05	148.9	4.30867e-05		204.6	0.000222468	204.6	0.000222468		204.6	0.000949865	204.6	0.000949865		204.9	0.00341898	204.9	0.00341898
119.4	1.33424e-05	119.4	1.21295e-05		149.1	4.3182e-05	149.1	4.3182e-05		204.9	0.000222815	204.9	0.000222815		204.9	0.000951479	204.9	0.000951479		205.2	0.00342384	205.2	0.00342384
119.6	1.33281e-05	119.6	1.21165e-05		149.3	4.32086e-05	149.3	4.32086e-05		205.2	0.000223286	205.2	0.000223286		205.2	0.000952849	205.2	0.000952849		205.5	0.00342874	205.5	0.00342874
119.7	1.33565e-05	119.7	1.21423e-05		149.4	4.32782e-05	149.4	4.32782e-05		205.5	0.000223396	205.5	0.000223396		205.5	0.000954473	205.5	0.000954473		205.8	0.00343346	205.8	0.00343346
119.8	1.3383e-05	119.8	1.21664e-05		149.6	4.33829e-05	149.6	4.33829e-05		205.8	0.000223497	205.8	0.000223497		205.8	0.000955565	205.8	0.000955565		206.1	0.00343827	206.1	0.00343827
119.9	1.33931e-05	119.9	1.21756e-05		149.8	4.34058e-05	149.8	4.34058e-05		206.1	0.000223658	206.1	0.000223658		206.1	0.00095667	206.1	0.00095667		206.4	0.0034429	206.4	0.0034429
120	1.33661e-05	120	1.2151e-05		150	4.34064e-05	150	4.34064e-05		206.4	0.000223625	206.4	0.000223625		206.4	0.00095801	206.4	0.00095801		206.7	0.00344771	206.7	0.00344771
120.1	1.33711e-05	120.1	1.21556e-05		150.1	4.34857e-05	150.1	4.34857e-05		206.7	0.000223726	206.7	0.000223726		206.7	0.00095941	206.7	0.00095941		207	0.00345277	207	0.00345277
120.3	1.337e-05	120.3	1.21546e-05		150.3	4.34502e-05	150.3	4.34502e-05		207	0.000223692	207	0.000223692		207	0.000961022	207	0.000961022		207.3	0.00345795	207.3	0.00345795
120.4	1.33902e-05	120.4	1.21729e-05		150.5	4.35858e-05	150.5	4.35858e-05		207.3	0.000223957	207.3	0.000223957		207.3	0.000961809	207.3	0.000961809		207.7	0.003463	207.7	0.003463
120.5	1.33874e-05	120.5	1.21704e-05		150.7	4.3602e-05	150.7	4.3602e-05		207.7	0.000223811	207.7	0.000223811		207.7	0.000962931	207.7	0.000962931		208	0.00346804	208	0.00346804
120.6	1.33815e-05	120.6	1.2165e-05		150.8	4.34806e-05	150.8	4.34806e-05		208	0.000223834	208	0.000223834		208	0.000964156	208	0.000964156		208.3	0.00347301	208.3	0.00347301
120.7	1.34009e-05	120.7	1.21826e-05		151	4.35222e-05	151	4.35222e-05		208.3	0.000224142	208.3	0.000224142		208.3	0.000965259	208.3	0.000965259		208.6	0.00347805	208.6	0.00347805
120.8	1.33667e-05	120.8	1.21515e-05		151.2	4.3508e-05	151.2	4.3508e-05		208.6	0.000224559	208.6	0.000224559		208.6	0.000966274	208.6	0.000966274		208.9	0.00348299	208.9	0.00348299
120.9	1.33869e-05	120.9	1.21699e-05		151.4	4.35352e-05	151.4	4.35352e-05		208.9	0.000224668	208.9	0.000224668		208.9	0.00096766	208.9	0.00096766		209.2	0.00348816	209.2	0.00348816
121.1	1.34165e-05	121.1	1.21968e-05		151.5	4.3466e-05	151.5	4.3466e-05		209.2	0.000225046	209.2	0.000225046		209.2	0.000969076	209.2	0.000969076		209.5	0.00349332	209.5	0.00349332
121.2	1.34395e-05	121.2	1.22177e-05		151.7	4.35602e-05	151.7	4.35602e-05		209.5	0.000225312	209.5	0.000225312		209.5	0.000970248	209.5	0.000970248		209.8	0.0034984	209.8	0.0034984
121.3	1.33908e-05	121.3	1.21735e-05		151.9	4.36052e-05	151.9	4.36052e-05		209.8	0.000225488	209.8	0.000225488		209.8	0.000972329	209.8	0.000972329		210.1	0.00350336	210.1	0.00350336
121.4	1.33956e-05	121.4	1.21778e-05		152.1	4.36259e-05	152.1	4.36259e-05		210.1	0.000226087	210.1	0.000226087		210.1	0.00097326	210.1	0.00097326		210.4	0.00350826	210.4	0.00350826
121.5	1.33702e-05	121.5	1.21548e-05		152.2	4.37132e-05	152.2	4.37132e-05		210.4	0.000226268	210.4	0.000226268		210.4	0.000974807	210.4	0.000974807		210.8	0.00351302	210.8	0.00351302
121.6	1.34095e-05	121.6	1.21905e-05		152.4	4.3648e-05	152.4	4.3648e-05		210.8	0.000226802	210.8	0.000226802		210.8	0.00097621	210.8	0.00097621		211.1	0.00351768	211.1	0.00351768
121.7	1.34751e-05	121.7	1.22501e-05		152.6	4.38384e-05	152.6	4.38384e-05		211.1	0.000226937	211.1	0.000226937		211.1	0.000977325	211.1	0.000977325		211.4	0.00352227	211.4	0.00352227
121.9	1.34859e-05	121.9	1.226e-05		152.8	4.38502e-05	152.8	4.38502e-05		211.4	0.000227382	211.4	0.000227382		211.4	0.00097901	211.4	0.00097901		211.7	0.0035268	211.7	0.0035268
122	1.34195e-05	122	1.21995e-05		153	4.39864e-05	153	4.39864e-05		211.7	0.000227456	211.7	0.000227456		211.7	0.000979335	211.7	0.000979335		212	0.00353134	212	0.00353134
122.1	1.34134e-05	122.1	1.2194e-05		153.1	4.39505e-05	153.1	4.39505e-05		212	0.000227805	212	0.000227805		212	0.000981163	212	0.000981163		212.3	0.00353599	212.3	0.00353599
122.2	1.3444e-05	122.2	1.22218e-05		153.3	4.40928e-05	153.3	4.40928e-05		212.3	0.000227887	212.3	0.000227887		212.3	0.000981674	212.3	0.000981674		212.6	0.00354062	212.6	0.00354062
122.3	1.3438e-05	122.3	1.22164e-05		153.5	4.41436e-05	153.5	4.41436e-05		212.6	0.00022825	212.6	0.00022825		212.6	0.000983201	212.6	0.000983201		212.9	0.00354537	212.9	0.00354537
122.4	1.34664e-05	122.4	1.22421e-05		153.7	4.42303e-05	153.7	4.42303e-05		212.9	0.000228382	212.9	0.000228382		212.9	0.000984061	212.9	0.000984061		213.3	0.00355017	213.3	0.00355017
122.6	1.34189e-05	122.6	1.2199e-05		153.8	4.42063e-05	153.8	4.42063e-05		213.3	0.00022881	213.3	0.00022881		213.3	0.000985463	213.3	0.000985463		213.6	0.00355507	213.6	0.00355507
122.7	1.34098e-05	122.7	1.21907e-05		154	4.43384e-05	154	4.43384e-05		213.6	0.000228926	213.6	0.000228926		213.6	0.000986705	213.6	0.000986705		213.9	0.00356001	213.9	0.00356001
122.8	1.33561e-05	122.8	1.21419e-05		154.2	4.435e-05	154.2	4.435e-05		213.9	0.000229148	213.9	0.000229148		213.9	0.00098809	213.9	0.00098809		214.2	0.00356489	214.2	0.00356489
122.9	1.3386e-05	122.9	1.21691e-05		154.4	4.44329e-05	154.4	4.44329e-05		214.2	0.000229393	214.2	0.000229393		214.2	0.000989187	214.2	0.000989187		214.5	0.00356987	214.5	0.00356987
123	1.33975e-05	123	1.21795e-05		154.5	4.44826e-05	154.5	4.44826e-05		214.5	0.00022953	214.5	0.00022953		214.5	0.000990562	214.5	0.000990562		214.8	0.00357472	214.8	0.00357472
123.1	1.33922e-05	123.1	1.21747e-05		154.7	4.46054e-05	154.7	4.46054e-05		214.8	0.000229843	214.8	0.000229843		214.8	0.0009917	214.8	0.0009917		215.2	0.0035794	215.2	0.0035794
123.2	1.3399e-05	123.2	1.2181e-05		154.9	4.46626e-05	154.9	4.46626e-05		215.2	0.00023012	215.2	0.00023012		215.2	0.000993342	215.2	0.000993342		215.5	0.00358403	215.5	0.00358403
123.4	1.33732e-05	123.4	1.21574e-05		155.1	4.47007e-05	155.1	4.47007e-05		215.5	0.000230447	215.5	0.000230447		215.5	0.000994813	215.5	0.000994813		215.8	0.00358862	215.8	0.00358862
123.5	1.3341e-05	123.5	1.21282e-05		155.3	4.46753e-05	155.3	4.46753e-05		215.8	0.000230558	215.8	0.000230558		215.8	0.000996221	215.8	0.000996221		216.1	0.00359322	216.1	0.00359322
123.6	1.33682e-05	123.6	1.21529e-05		155.4	4.48532e-05	155.4	4.48532e-05		216.1	0.000230833	216.1	0.000230833		216.1	0.000997679	216.1	0.000997679		216.4	0.00359786	216.4	0.00359786
123.7	1.33756e-05	123.7	1.21596e-05		155.6	4.47432e-05	155.6	4.47432e-05		216.4	0.000231313	216.4	0.000231313		216.4	0.000998565	216.4	0.000998565		216.7	0.00360256	216.7	0.00360256
123.8	1.33907e-05	123.8	1.21734e-05		155.8	4.47984e-05	155.8	4.47984e-05		216.7	0.00023153	216.7	0.00023153		216.7	0.00100033	216.7	0.00100033		217.1	0.00360729	217.1	0.00360729
123.9	1.33864e-05	123.9	1.21694e-05		156	4.47038e-05	156	4.47038e-05		217.1	0.000231727	217.1	0.000231727		217.1	0.00100162	217.1	0.00100162		217.4	0.00361202	217.4	0.00361202
124.1	1.33979e-05	124.1	1.21799e-05		156.2	4.48175e-05	156.2	4.48175e-05		217.4	0.000231941	217.4	0.000231941		217.4	0.00100236	217.4	0.00100236		217.7	0.00361674	217.7	0.00361674
124.2	1.34185e-05	124.2	1.21986e-05		156.3	4.47517e-05	156.3	4.47517e-05		217.7	0.000232145	217.7	0.000232145		217.7	0.00100381	217.7	0.00100381		218	0.00362158	218	0.00362158
124.3	1.34669e-05	124.3	1.22426e-05		156.5	4.47857e-05	156.5	4.47857e-05		218	0.000232432	218	0.000232432		218	0.0010052	218	0.0010052		218.3	0.00362648	218.3	0.00362648
124.4	1.34648e-05	124.4	1.22407e-05		156.7	4.48992e-05	156.7	4.48992e-05		218.3	0.000232777	218.3	0.000232777		218.3	0.00100682	218.3	0.00100682		218.7	0.00363136	218.7	0.00363136
124.5	1.34691e-05	124.5	1.22446e-05		156.9	4.48591e-05	156.9	4.48591e-05		218.7	0.000233095	218.7	0.000233095		218.7	0.001008	218.7	0.001008		219	0.0036362	219	0.0036362
124.6	1.34981e-05	124.6	1.2271e-05		157	4.49265e-05	157	4.49265e-05		219	0.000233402	219	0.000233402		219	0.00100919	219	0.00100919		219.3	0.00364098	219.3	0.00364098
124.8	1.34857e-05	124.8	1.22598e-05		157.2	4.48743e-05	157.2	4.48743e-05		219.3	0.000233594	219.3	0.000233594		219.3	0.00101038	219.3	0.00101038		219.6	0.0036459	219.6	0.0036459
124.9	1.34968e-05	124.9	1.22698e-05		157.4	4.50014e-05	157.4	4.50014e-05		219.6	0.000233748	219.6	0.000233748		219.6	0.00101207	219.6	0.00101207		219.9	0.00365096	219.9	0.00365096
125	1.35316e-05	125	1.23014e-05		157.6	4.49902e-05	157.6	4.49902e-05		219.9	0.000233997	219.9	0.000233997		219.9	0.00101357	219.9	0.00101357		220.3	0.003656	220.3	0.003656
125.1	1.35886e-05	125.1	1.23533e-05		157.8	4.4989e-05	157.8	4.4989e-05		220.3	0.000234383	220.3	0.000234383		220.3	0.00101477	220.3	0.00101477		220.6	0.00366106	220.6	0.00366106
125.2	1.3567e-05	125.2	1.23336e-05		157.9	4.51575e-05	157.9	4.51575e-05		220.6	0.000234675	220.6	0.000234675		220.6	0.00101615	220.6	0.00101615		220.9	0.00366612	220.9	0.00366612
125.3	1.35713e-05	125.3	1.23376e-05		158.1	4.51309e-05	158.1	4.51309e-05		220.9	0.000234938	220.9	0.000234938		220.9	0.00101729	220.9	0.00101729		221.2	0.00367116	221.2	0.00367116
125.4	1.35568e-05	125.4	1.23243e-05		158.3	4.51614e-05	158.3	4.51614e-05		221.2	0.000235151	221.2	0.000235151		221.2	0.00101908	221.2	0.00101908		221.5	0.0036762	221.5	0.0036762
125.6	1.35573e-05	125.6	1.23248e-05		158.5	4.52001e-05	158.5	4.52001e-05		221.5	0.000235562	221.5	0.000235562		221.5	0.00102045	221.5	0.00102045		221.9	0.00368123	221.9	0.00368123
125.7	1.35946e-05	125.7	1.23587e-05		158.7	4.5041e-05	158.7	4.5041e-05		221.9	0.000235943	221.9	0.000235943		221.9	0.00102181	221.9	0.00102181		222.2	0.00368634	222.2	0.00368634
125.8	1.35766e-05	125.8	1.23423e-05		158.8	4.50225e-05	158.8	4.50225e-05		222.2	0.000236189	222.2	0.000236189		222.2	0.00102287	222.2	0.00102287		222.5	0.0036915	222.5	0.0036915
125.9	1.36006e-05	125.9	1.23641e-05		159	4.49762e-05	159	4.49762e-05		222.5	0.000236404	222.5	0.000236404		222.5	0.00102417	222.5	0.00102417		222.8	0.00369654	222.8	0.00369654
126	1.35697e-05	126	1.23361e-05		159.2	4.48938e-05	159.2	4.48938e-05		222.8	0.000236628	222.8	0.000236628		222.8	0.00102584	222.8	0.00102584		223.2	0.00370185	223.2	0.00370185
126.1	1.35582e-05	126.1	1.23256e-05		159.4	4.49542e-05	159.4	4.49542e-05		223.2	0.000236739	223.2	0.000236739		223.2	0.00102758	223.2	0.00102758		223.5	0.00370735	223.5	0.00370735
126.3	1.3553e-05	126.3	1.23209e-05		159.6	4.49156e-05	159.6	4.49156e-05		223.5	0.000237069	223.5	0.000237069		223.5	0.0010292	223.5	0.0010292		223.8	0.00371284	223.8	0.00371284
126.4	1.35803e-05	126.4	1.23457e-05		159.7	4.4937e-05	159.7	4.4937e-05		223.8	0.00023752	223.8	0.00023752		223.8	0.00103064	223.8	0.00103064		224.1	0.00371852	224.1	0.00371852
126.5	1.3629e-05	126.5	1.239e-05		159.9	4.49308e-05	159.9	4.49308e-05		224.1	0.000237945	224.1	0.000237945		224.1	0.00103181	224.1	0.00103181		224.5	0.00372423	224.5	0.00372423
126.6	1.36001e-05	126.6	1.23637e-05		160.1	4.48583e-05	160.1	4.48583e-05		224.5	0.000238538	224.5	0.000238538		224.5	0.00103309	224.5	0.00103309		224.8	0.00372995	224.8	0.00372995
126.7	1.36104e-05	126.7	1.23731e-05		160.3	4.48748e-05	160.3	4.48748e-05		224.8	0.000238999	224.8	0.000238999		224.8	0.00103455	224.8	0.00103455		225.1	0.00373553	225.1	0.00373553
126.8	1.35869e-05	126.8	1.23517e-05		160.5	4.48659e-05	160.5	4.48659e-05		225.1	0.000239153	225.1	0.000239153		225.1	0.00103557	225.1	0.00103557		225.4	0.00374102	225.4	0.00374102
127	1.35658e-05	127	1.23325e-05		160.6	4.49142e-05	160.6	4.49142e-05		225.4	0.000239489	225.4	0.000239489		225.4	0.00103643	225.4	0.00103643		225.8	0.00374648	225.8	0.00374648
127.1	1.35694e-05	127.1	1.23358e-05		160.8	4.489e-05	160.8	4.489e-05		225.8	0.00023998	225.8	0.00023998		225.8	0.00103785	225.8	0.00103785		226.1	0.00375194	226.1	0.00375194
127.2	1.35869e-05	127.2	1.23517e-05		161	4.48939e-05	161	4.48939e-05		226.1	0.00024003	226.1	0.00024003		226.1	0.00103874	226.1	0.00103874		226.4	0.00375729	226.4	0.00375729
127.3	1.36304e-05	127.3	1.23912e-05		161.2	4.49535e-05	161.2	4.49535e-05		226.4	0.000240508	226.4	0.000240508		226.4	0.00103954	226.4	0.00103954		226.7	0.00376255	226.7	0.00376255
127.4	1.36682e-05	127.4	1.24256e-05		161.4	4.49186e-05	161.4	4.49186e-05		226.7	0.000241032	226.7	0.000241032		226.7	0.00104107	226.7	0.00104107		227.1	0.0037678	227.1	0.0037678
127.5	1.37139e-05	127.5	1.24672e-05		161.5	4.48734e-05	161.5	4.48734e-05		227.1	0.000241312	227.1	0.000241312		227.1	0.00104216	227.1	0.00104216		227.4	0.00377309	227.4	0.00377309
127.6	1.36856e-05	127.6	1.24414e-05		161.7	4.50172e-05	161.7	4.50172e-05		227.4	0.000241819	227.4	0.000241819		227.4	0.00104378	227.4	0.00104378		227.7	0.00377839	227.7	0.00377839
127.8	1.36737e-05	127.8	1.24307e-05		161.9	4.50343e-05	161.9	4.50343e-05		227.7	0.000241916	227.7	0.000241916		227.7	0.00104505	227.7	0.00104505		228.1	0.00378361	228.1	0.00378361
127.9	1.36734e-05	127.9	1.24303e-05		162.1	4.49444e-05	162.1	4.49444e-05		228.1	0.000242364	228.1	0.000242364		228.1	0.0010464	228.1	0.0010464		228.4	0.00378879	228.4	0.00378879
128	1.37278e-05	128	1.24798e-05		162.3	4.5062e-05	162.3	4.5062e-05		228.4	0.000242451	228.4	0.000242451		228.4	0.00104763	228.4	0.00104763		228.7	0.00379391	228.7	0.00379391
128.1	1.37891e-05	128.1	1.25356e-05		162.5	4.51101e-05	162.5	4.51101e-05		228.7	0.000242929	228.7	0.000242929		228.7	0.00104873	228.7	0.00104873		229	0.00379906	229	0.00379906
128.2	1.38197e-05	128.2	1.25634e-05		162.6	4.50909e-05	162.6	4.50909e-05		229	0.000243004	229	0.000243004		229	0.00105007	229	0.00105007		229.4	0.00380416	229.4	0.00380416
128.3	1.38744e-05	128.3	1.26131e-05		162.8	4.51876e-05	162.8	4.51876e-05		229.4	0.000243352	229.4	0.000243352		229.4	0.00105133	229.4	0.00105133		229.7	0.00380934	229.7	0.00380934
128.5	1.38696e-05	128.5	1.26088e-05		163	4.52317e-05	163	4.52317e-05		229.7	0.000243567	229.7	0.000243567		229.7	0.00105242	229.7	0.00105242		230	0.0038144	230	0.0038144
[truncated: 27,609 more rows]
