# Supplementary material for: A tutorial review of linear rheology for polymer chemists: basics and best practices for covalent adaptable networks
Source: Royal Society of Chemistry journal article supplement (doi:10.1039/d3py01367g), 2024-01-01
Supplement: d3py01367g2.xlsx [file d3py01367g2.xlsx]

## Sheet: Instructions
Before Calculation 1. Perform a stress relaxation or SAOS experiment on a sample; extend the range by time-temperature superposition if possible 2. If the data do not contain information from the terminal relaxation regime (see paper for experimental signatures), then STOP. - In such a case, the worksheet will produce numbers. But they likely will be meaningless since the relevant information is …
To Do The Calculation 1. Sum up the corresponding DRS elements in columns B,D, E, J, and K - These quantities are shown in blue - Eight DRS modes are used by default. If your DRS has fewer or more modes, delete or add rows as needed 2. The relaxation times based on the 1st and 2nd moments are computed using - tau_term(1) = sum(Giτi)/sum(Gi) - tau_term(2) = sum(Giτi^2)/sum(Giτi) - ensure that cell…

## Sheet: Calculations and Plot
This sheet demonstrates how relaxation times based on different moments of the discrete relaxation spectrum (DRS) are computed, following section 4.2 of the review. The DRS {Gi, τi}, shaded in gray, is obtained using a program like pyReSpect. Important: These calculations are meaningful only if the DRS is extracted from observations that include the terminal relaxation regime Here, we use the DRS…
Relaxation time based on 1st moment	tau_term(1) [s]	5.59423
Relaxation time based on 2nd moment	tau_term(2) [s]	297.931					Helper for tau_cross calculation
Relaxtion based on G' and G" cross-over	tau_cross [s]	15.9851										Goal: use solver to find ω that minimizes fobj
Longest relaxation time*	tau_term(max) [s]	1013.08					ω = ωcross [rad/s]	0.0625583
							fobj	1.32349e-23
	Discrete Relaxation Spectrum								G'	G"
	Gi [Pa]	τi [s]	Giτi2 [Pa s2]	Giτi [Pa s]			ωτi	(ωτi)2	G'i [Pa]	G"i [Pa]
	332.895	1013.08	3.41657e+08	337248			63.3762	4016.55	332.812	5.25137
	2153.54	198.973	8.52591e+07	428496			12.4474	154.938	2139.73	171.902
	6356.97	57.1415	2.07565e+07	363247			3.57468	12.7783	5895.59	1649.27
	13954	17.4389	4.24365e+06	243343			1.09095	1.19017	7582.82	6950.66
	31833	3.60869	414549	114875			0.225753	0.0509646	1543.68	6837.92
	44026.4	0.59759	15722.4	26309.7			0.0373842	0.00139758	61.4445	1643.6
	52844.8	0.0777057	319.086	4106.34			0.00486114	2.36306e-05	1.24873	256.88
	119902	0.00558289	3.73718	669.4			0.000349256	1.2198e-07	0.0146256	41.8765
sum	271404		4.52347e+08	1.51829e+06					17557.3	17557.3
Caveats 1. Experiments probe relaxation timescales over a finite window. Thus, the relaxation spectrum is not completely known 2. The discrete relaxation spectrum is not unique. Thus, individual weights and timescales should not be over-interpreted 3. From (2) it follows that the longest relaxation time obtained from experimental data is noisy; we caution against using it. 4. In contrast, if the …
Arbitrary modulus value for plotting terminal relaxation times [Pa]	1000000
